# Supplementary material
Source: publisher figshare collection journal article supplement (https://acs.figshare.com/ndownloader/files/5844996)
Supplement: Supplementary file 1 [file 5844996]

 
data_SD-45
 
_audit_creation_method            'SHELXL-2014/7'
_shelx_SHELXL_version_number      '2014/7'
_chemical_name_systematic         ?
_chemical_name_common             ?
_chemical_melting_point           ?
_chemical_formula_moiety          ?
_chemical_formula_sum
 'C21 H20 N3 O4 V' 
_chemical_formula_weight          429.34

loop_
 _atom_type_symbol
 _atom_type_description
 _atom_type_scat_dispersion_real
 _atom_type_scat_dispersion_imag
 _atom_type_scat_source
 'C'  'C'   0.0033   0.0016
 'International Tables Vol C Tables 4.2.6.8 and 6.1.1.4'
 'H'  'H'   0.0000   0.0000
 'International Tables Vol C Tables 4.2.6.8 and 6.1.1.4'
 'N'  'N'   0.0061   0.0033
 'International Tables Vol C Tables 4.2.6.8 and 6.1.1.4'
 'O'  'O'   0.0106   0.0060
 'International Tables Vol C Tables 4.2.6.8 and 6.1.1.4'
 'V'  'V'   0.3005   0.5294
 'International Tables Vol C Tables 4.2.6.8 and 6.1.1.4'
 
_space_group_crystal_system       monoclinic
_space_group_IT_number            14
_space_group_name_H-M_alt         'P 21/n'
_space_group_name_Hall            '-P 2yn'
 
_shelx_space_group_comment
;
The symmetry employed for this shelxl refinement is uniquely defined
by the following loop, which should always be used as a source of
symmetry information in preference to the above space-group names.
They are only intended as comments.
;
 
loop_
 _space_group_symop_operation_xyz
 'x, y, z'
 '-x+1/2, y+1/2, -z+1/2'
 '-x, -y, -z'
 'x-1/2, -y-1/2, z-1/2'
 
_cell_length_a                    10.305(2)
_cell_length_b                    10.502(2)
_cell_length_c                    18.603(3)
_cell_angle_alpha                 90
_cell_angle_beta                  92.716(16)
_cell_angle_gamma                 90
_cell_volume                      2011.0(6)
_cell_formula_units_Z             4
_cell_measurement_temperature     200(2)
_cell_measurement_reflns_used    6846
_cell_measurement_theta_min      2.19
_cell_measurement_theta_max      23.71
 
_exptl_crystal_description       needle
_exptl_crystal_colour            black
_exptl_crystal_density_meas       ?
_exptl_crystal_density_method     ?
_exptl_crystal_density_diffrn     1.418          
_exptl_crystal_F_000              888
_exptl_transmission_factor_min    ?
_exptl_transmission_factor_max    ?
_exptl_crystal_size_max           0.370
_exptl_crystal_size_mid           0.180
_exptl_crystal_size_min           0.060
_exptl_absorpt_coefficient_mu     0.526
_shelx_estimated_absorpt_T_min    0.829
_shelx_estimated_absorpt_T_max    0.969
_exptl_absorpt_correction_type   integration
_exptl_absorpt_correction_T_min  0.6689
_exptl_absorpt_correction_T_max  0.8610
_exptl_absorpt_process_details  
;
Stoe & Cie (2002). X-SHAPE. Stoe & Cie, Darmstadt, Germany
;
_diffrn_ambient_temperature       200(2)
_diffrn_radiation_wavelength      0.71073
_diffrn_radiation_probe          x-ray
_diffrn_radiation_type           MoK\a
_diffrn_source                   'fine-focus sealed tube'
_diffrn_radiation_monochromator  graphite
_diffrn_measurement_device_type  'STOE IPDS 2'
_diffrn_measurement_method       'rotation method'
_diffrn_detector_area_resol_mean 6.67
_diffrn_reflns_number             25250
_diffrn_reflns_av_unetI/netI      0.0741
_diffrn_reflns_av_R_equivalents   0.1342
_diffrn_reflns_limit_h_min        -12
_diffrn_reflns_limit_h_max        12
_diffrn_reflns_limit_k_min        -12
_diffrn_reflns_limit_k_max        12
_diffrn_reflns_limit_l_min        -22
_diffrn_reflns_limit_l_max        22
_diffrn_reflns_theta_min          2.192
_diffrn_reflns_theta_max          24.995
_diffrn_reflns_theta_full         24.995
_diffrn_measured_fraction_theta_max   1.000
_diffrn_measured_fraction_theta_full  1.000
_diffrn_reflns_Laue_measured_fraction_max    1.000
_diffrn_reflns_Laue_measured_fraction_full   1.000
_diffrn_reflns_point_group_measured_fraction_max   1.000
_diffrn_reflns_point_group_measured_fraction_full  1.000
_reflns_number_total              3549
_reflns_number_gt                 1625
_reflns_threshold_expression      'I > 2\s(I)'
_reflns_Friedel_coverage          0.000
_reflns_Friedel_fraction_max      .
_reflns_Friedel_fraction_full     .
 
_reflns_special_details
;
 Reflections were merged by SHELXL according to the crystal
 class for the calculation of statistics and refinement.
 
 _reflns_Friedel_fraction is defined as the number of unique
 Friedel pairs measured divided by the number that would be
 possible theoretically, ignoring centric projections and
 systematic absences.
;
 
_computing_data_collection        ?
_computing_cell_refinement        ?
_computing_data_reduction         ?
_computing_structure_solution     ?
_computing_structure_refinement 'SHELXL-2014/7 (Sheldrick, 2014)'
_computing_molecular_graphics     ?
_computing_publication_material   ?
_refine_special_details           ?
_refine_ls_structure_factor_coef  Fsqd
_refine_ls_matrix_type            full
_refine_ls_weighting_scheme       calc
_refine_ls_weighting_details
'w=1/[\s^2^(Fo^2^)+(0.0730P)^2^] where P=(Fo^2^+2Fc^2^)/3'
_atom_sites_solution_primary      ?
_atom_sites_solution_secondary    ?
_atom_sites_solution_hydrogens    mixed
_refine_ls_hydrogen_treatment     constr
_refine_ls_extinction_method      'SHELXL-2014/7 (Sheldrick 2014'
_refine_ls_extinction_coef        0.0070(12)
_refine_ls_extinction_expression
 'Fc^*^=kFc[1+0.001xFc^2^\l^3^/sin(2\q)]^-1/4^'
_refine_ls_number_reflns          3549
_refine_ls_number_parameters      265
_refine_ls_number_restraints      0
_refine_ls_R_factor_all           0.1224
_refine_ls_R_factor_gt            0.0497
_refine_ls_wR_factor_ref          0.1521
_refine_ls_wR_factor_gt           0.1164
_refine_ls_goodness_of_fit_ref    0.920
_refine_ls_restrained_S_all       0.920
_refine_ls_shift/su_max           0.000
_refine_ls_shift/su_mean          0.000
 
loop_
 _atom_site_label
 _atom_site_type_symbol
 _atom_site_fract_x
 _atom_site_fract_y
 _atom_site_fract_z
 _atom_site_U_iso_or_equiv
 _atom_site_adp_type
 _atom_site_occupancy
 _atom_site_site_symmetry_order  
 _atom_site_calc_flag
 _atom_site_refinement_flags_posn
 _atom_site_refinement_flags_adp
 _atom_site_refinement_flags_occupancy
 _atom_site_disorder_assembly
 _atom_site_disorder_group
V1 V 0.07403(8) 0.76109(7) 0.44422(4) 0.0823(3) Uani 1 1 d . . . . .
O1 O 0.0508(3) 0.8528(3) 0.52501(15) 0.0736(8) Uani 1 1 d . . . . .
O2 O 0.0449(3) 0.7711(3) 0.34293(16) 0.0863(9) Uani 1 1 d . . . . .
O3 O 0.1981(4) 0.6759(3) 0.4587(2) 0.1198(13) Uani 1 1 d . . . . .
O4 O -0.0625(5) 0.6691(4) 0.4485(2) 0.1497(19) Uani 1 1 d . . . . .
N1 N 0.1697(3) 0.9266(3) 0.41416(19) 0.0662(9) Uani 1 1 d . . . . .
N2 N 0.1656(3) 0.9529(3) 0.34055(19) 0.0695(9) Uani 1 1 d . . . . .
N3 N 0.2307(4) 1.0364(4) 0.2080(2) 0.0953(12) Uani 1 1 d . . . . .
H3A H 0.2851 1.0900 0.1814 0.114 Uiso 1 1 d R U . . .
H3B H 0.2421 1.0320 0.2590 0.114 Uiso 1 1 d R U . . .
C1 C 0.1374(4) 0.9215(4) 0.5650(2) 0.0683(11) Uani 1 1 d . . . . .
C2 C 0.1239(5) 0.9193(5) 0.6402(3) 0.0813(12) Uani 1 1 d . . . . .
H2 H 0.0596 0.8698 0.6598 0.098 Uiso 1 1 calc R U . . .
C3 C 0.2051(5) 0.9897(5) 0.6835(3) 0.0881(14) Uani 1 1 d . . . . .
H3 H 0.1941 0.9899 0.7328 0.106 Uiso 1 1 calc R U . . .
C4 C 0.3062(5) 1.0629(4) 0.6555(3) 0.0806(13) Uani 1 1 d . . . . .
C5 C 0.3933(6) 1.1304(6) 0.7021(3) 0.1068(17) Uani 1 1 d . . . . .
H5 H 0.3793 1.1325 0.7511 0.128 Uiso 1 1 calc R U . . .
C6 C 0.4967(6) 1.1920(6) 0.6768(4) 0.1147(19) Uani 1 1 d . . . . .
H6 H 0.5526 1.2372 0.7081 0.138 Uiso 1 1 calc R U . . .
C7 C 0.5190(5) 1.1875(5) 0.6043(3) 0.0925(15) Uani 1 1 d . . . . .
H7 H 0.5917 1.2278 0.5872 0.111 Uiso 1 1 calc R U . . .
C8 C 0.4348(4) 1.1239(4) 0.5566(3) 0.0797(12) Uani 1 1 d . . . . .
H8 H 0.4522 1.1216 0.5080 0.096 Uiso 1 1 calc R U . . .
C9 C 0.3229(4) 1.0623(4) 0.5804(2) 0.0709(11) Uani 1 1 d . . . . .
C10 C 0.2298(4) 0.9967(4) 0.5334(2) 0.0641(10) Uani 1 1 d . . . . .
C21 C 0.2609(5) 1.1393(4) 0.4220(3) 0.0833(13) Uani 1 1 d . . . . .
H21A H 0.3369 1.1260 0.3950 0.125 Uiso 1 1 calc R U . . .
H21B H 0.2793 1.2017 0.4588 0.125 Uiso 1 1 calc R U . . .
H21C H 0.1910 1.1688 0.3903 0.125 Uiso 1 1 calc R U . . .
C11 C 0.2225(4) 1.0159(4) 0.4563(2) 0.0649(10) Uani 1 1 d . . . . .
C12 C 0.0984(4) 0.8648(4) 0.3059(2) 0.0725(11) Uani 1 1 d . . . . .
C13 C 0.0721(4) 0.8692(4) 0.2285(2) 0.0690(11) Uani 1 1 d . . . . .
C14 C 0.1363(4) 0.9532(4) 0.1834(2) 0.0740(12) Uani 1 1 d . . . . .
C15 C 0.0991(5) 0.9527(4) 0.1095(3) 0.0840(13) Uani 1 1 d . . . . .
H15 H 0.1412 1.0068 0.0785 0.101 Uiso 1 1 calc R U . . .
C16 C 0.0034(5) 0.8752(5) 0.0824(3) 0.0895(14) Uani 1 1 d . . . . .
H16 H -0.0205 0.8786 0.0336 0.107 Uiso 1 1 calc R U . . .
C17 C -0.0587(5) 0.7915(5) 0.1264(3) 0.0885(14) Uani 1 1 d . . . . .
H17 H -0.1238 0.7380 0.1076 0.106 Uiso 1 1 calc R U . . .
C18 C -0.0230(4) 0.7884(4) 0.1981(3) 0.0804(12) Uani 1 1 d . . . . .
H18 H -0.0634 0.7306 0.2276 0.096 Uiso 1 1 calc R U . . .
C19 C -0.1630(11) 0.5956(9) 0.4242(6) 0.187(4) Uani 1 1 d . . . . .
H19A H -0.2107 0.5668 0.4649 0.224 Uiso 1 1 calc R U . . .
H19B H -0.2214 0.6466 0.3936 0.224 Uiso 1 1 calc R U . . .
C20 C -0.1265(16) 0.4986(12) 0.3887(5) 0.281(8) Uani 1 1 d . . . . .
H20A H -0.0795 0.5264 0.3482 0.337 Uiso 1 1 calc R U . . .
H20B H -0.2012 0.4506 0.3721 0.337 Uiso 1 1 calc R U . . .
H20C H -0.0712 0.4460 0.4193 0.337 Uiso 1 1 calc R U . . .
 
loop_
 _atom_site_aniso_label
 _atom_site_aniso_U_11
 _atom_site_aniso_U_22
 _atom_site_aniso_U_33
 _atom_site_aniso_U_23
 _atom_site_aniso_U_13
 _atom_site_aniso_U_12
V1 0.0993(6) 0.0674(5) 0.0814(6) 0.0014(4) 0.0170(4) -0.0153(4)
O1 0.0653(17) 0.0808(18) 0.0756(19) 0.0020(14) 0.0114(14) -0.0083(15)
O2 0.107(2) 0.0775(18) 0.0756(19) 0.0009(15) 0.0120(16) -0.0302(17)
O3 0.155(3) 0.080(2) 0.129(3) 0.025(2) 0.049(2) 0.038(2)
O4 0.204(4) 0.150(3) 0.099(3) -0.023(2) 0.040(3) -0.130(4)
N1 0.062(2) 0.0655(19) 0.071(2) 0.0009(17) 0.0047(16) -0.0003(17)
N2 0.069(2) 0.071(2) 0.069(2) 0.0017(17) 0.0084(17) -0.0076(18)
N3 0.099(3) 0.101(3) 0.086(3) 0.016(2) 0.004(2) -0.032(2)
C1 0.060(2) 0.071(2) 0.075(3) 0.004(2) 0.006(2) 0.006(2)
C2 0.076(3) 0.092(3) 0.076(3) 0.003(3) 0.013(2) 0.001(3)
C3 0.093(4) 0.102(3) 0.069(3) 0.003(3) 0.001(3) 0.008(3)
C4 0.075(3) 0.084(3) 0.083(4) -0.004(2) -0.002(3) 0.002(2)
C5 0.109(4) 0.119(4) 0.090(4) -0.008(3) -0.019(3) -0.010(4)
C6 0.108(5) 0.125(5) 0.108(5) -0.003(4) -0.027(4) -0.022(4)
C7 0.074(3) 0.086(3) 0.116(5) -0.003(3) -0.010(3) -0.007(3)
C8 0.065(3) 0.077(3) 0.097(3) -0.004(3) 0.000(2) -0.003(2)
C9 0.067(3) 0.070(2) 0.076(3) -0.005(2) 0.002(2) 0.003(2)
C10 0.064(2) 0.057(2) 0.072(3) 0.0007(19) 0.001(2) 0.006(2)
C21 0.089(3) 0.073(3) 0.088(3) 0.008(2) -0.002(2) -0.017(2)
C11 0.060(2) 0.063(2) 0.072(3) 0.001(2) 0.005(2) -0.001(2)
C12 0.068(3) 0.069(3) 0.081(3) 0.000(2) 0.012(2) -0.010(2)
C13 0.067(3) 0.068(2) 0.072(3) 0.000(2) 0.004(2) 0.000(2)
C14 0.077(3) 0.064(2) 0.081(3) -0.003(2) 0.002(2) 0.002(2)
C15 0.102(4) 0.075(3) 0.076(3) 0.005(2) 0.004(3) 0.005(3)
C16 0.103(4) 0.077(3) 0.087(3) -0.004(3) -0.009(3) 0.009(3)
C17 0.086(3) 0.089(3) 0.090(4) -0.015(3) -0.007(3) 0.001(3)
C18 0.081(3) 0.079(3) 0.082(3) -0.008(2) 0.005(2) -0.009(2)
C19 0.237(11) 0.127(7) 0.199(10) -0.016(6) 0.035(8) -0.017(7)
C20 0.49(2) 0.225(12) 0.135(8) -0.027(8) 0.065(10) -0.196(14)
 
_geom_special_details
;
 All esds (except the esd in the dihedral angle between two l.s. planes)
 are estimated using the full covariance matrix.  The cell esds are taken
 into account individually in the estimation of esds in distances, angles
 and torsion angles; correlations between esds in cell parameters are only
 used when they are defined by crystal symmetry.  An approximate (isotropic)
 treatment of cell esds is used for estimating esds involving l.s. planes.
;
 
loop_
 _geom_bond_atom_site_label_1
 _geom_bond_atom_site_label_2
 _geom_bond_distance
 _geom_bond_site_symmetry_2
 _geom_bond_publ_flag
V1 O3 1.573(4) . ?
V1 O4 1.712(4) . ?
V1 O1 1.810(3) . ?
V1 O2 1.897(3) . ?
V1 N1 2.088(3) . ?
O1 C1 1.345(5) . ?
O2 C12 1.335(5) . ?
O4 C19 1.351(11) . ?
N1 C11 1.322(5) . ?
N1 N2 1.396(4) . ?
N2 C12 1.308(5) . ?
N3 C14 1.371(5) . ?
N3 H3A 0.9500 . ?
N3 H3B 0.9500 . ?
C1 C10 1.389(6) . ?
C1 C2 1.412(6) . ?
C2 C3 1.354(6) . ?
C2 H2 0.9300 . ?
C3 C4 1.413(7) . ?
C3 H3 0.9300 . ?
C4 C5 1.408(7) . ?
C4 C9 1.416(6) . ?
C5 C6 1.350(8) . ?
C5 H5 0.9300 . ?
C6 C7 1.381(8) . ?
C6 H6 0.9300 . ?
C7 C8 1.383(6) . ?
C7 H7 0.9300 . ?
C8 C9 1.412(6) . ?
C8 H8 0.9300 . ?
C9 C10 1.442(6) . ?
C10 C11 1.448(5) . ?
C21 C11 1.506(6) . ?
C21 H21A 0.9600 . ?
C21 H21B 0.9600 . ?
C21 H21C 0.9600 . ?
C12 C13 1.453(6) . ?
C13 C18 1.396(6) . ?
C13 C14 1.404(6) . ?
C14 C15 1.410(6) . ?
C15 C16 1.357(6) . ?
C15 H15 0.9300 . ?
C16 C17 1.379(7) . ?
C16 H16 0.9300 . ?
C17 C18 1.367(6) . ?
C17 H17 0.9300 . ?
C18 H18 0.9300 . ?
C19 C20 1.281(13) . ?
C19 H19A 0.9700 . ?
C19 H19B 0.9700 . ?
C20 H20A 0.9600 . ?
C20 H20B 0.9600 . ?
C20 H20C 0.9600 . ?
 
loop_
 _geom_angle_atom_site_label_1
 _geom_angle_atom_site_label_2
 _geom_angle_atom_site_label_3
 _geom_angle
 _geom_angle_site_symmetry_1
 _geom_angle_site_symmetry_3
 _geom_angle_publ_flag
O3 V1 O4 109.5(2) . . ?
O3 V1 O1 107.37(18) . . ?
O4 V1 O1 96.89(17) . . ?
O3 V1 O2 106.93(18) . . ?
O4 V1 O2 89.20(16) . . ?
O1 V1 O2 140.73(14) . . ?
O3 V1 N1 97.45(17) . . ?
O4 V1 N1 151.9(2) . . ?
O1 V1 N1 82.08(13) . . ?
O2 V1 N1 75.06(13) . . ?
C1 O1 V1 129.4(3) . . ?
C12 O2 V1 120.3(3) . . ?
C19 O4 V1 157.6(5) . . ?
C11 N1 N2 115.7(3) . . ?
C11 N1 V1 128.2(3) . . ?
N2 N1 V1 115.8(2) . . ?
C12 N2 N1 109.6(3) . . ?
C14 N3 H3A 129.1 . . ?
C14 N3 H3B 110.8 . . ?
H3A N3 H3B 120.1 . . ?
O1 C1 C10 121.5(4) . . ?
O1 C1 C2 116.4(4) . . ?
C10 C1 C2 122.0(4) . . ?
C3 C2 C1 119.5(5) . . ?
C3 C2 H2 120.2 . . ?
C1 C2 H2 120.2 . . ?
C2 C3 C4 121.6(5) . . ?
C2 C3 H3 119.2 . . ?
C4 C3 H3 119.2 . . ?
C5 C4 C3 120.5(5) . . ?
C5 C4 C9 120.3(5) . . ?
C3 C4 C9 119.1(4) . . ?
C6 C5 C4 121.2(6) . . ?
C6 C5 H5 119.4 . . ?
C4 C5 H5 119.4 . . ?
C5 C6 C7 119.6(5) . . ?
C5 C6 H6 120.2 . . ?
C7 C6 H6 120.2 . . ?
C6 C7 C8 121.0(5) . . ?
C6 C7 H7 119.5 . . ?
C8 C7 H7 119.5 . . ?
C7 C8 C9 121.1(5) . . ?
C7 C8 H8 119.4 . . ?
C9 C8 H8 119.4 . . ?
C8 C9 C4 116.6(4) . . ?
C8 C9 C10 123.9(4) . . ?
C4 C9 C10 119.5(4) . . ?
C1 C10 C9 117.7(4) . . ?
C1 C10 C11 119.6(4) . . ?
C9 C10 C11 122.5(4) . . ?
C11 C21 H21A 109.5 . . ?
C11 C21 H21B 109.5 . . ?
H21A C21 H21B 109.5 . . ?
C11 C21 H21C 109.5 . . ?
H21A C21 H21C 109.5 . . ?
H21B C21 H21C 109.5 . . ?
N1 C11 C10 119.3(4) . . ?
N1 C11 C21 117.9(4) . . ?
C10 C11 C21 122.5(4) . . ?
N2 C12 O2 119.2(4) . . ?
N2 C12 C13 122.4(4) . . ?
O2 C12 C13 118.2(4) . . ?
C18 C13 C14 118.8(4) . . ?
C18 C13 C12 118.4(4) . . ?
C14 C13 C12 122.8(4) . . ?
N3 C14 C13 123.2(4) . . ?
N3 C14 C15 119.0(4) . . ?
C13 C14 C15 117.8(4) . . ?
C16 C15 C14 121.5(5) . . ?
C16 C15 H15 119.2 . . ?
C14 C15 H15 119.2 . . ?
C15 C16 C17 120.8(5) . . ?
C15 C16 H16 119.6 . . ?
C17 C16 H16 119.6 . . ?
C18 C17 C16 118.9(5) . . ?
C18 C17 H17 120.6 . . ?
C16 C17 H17 120.6 . . ?
C17 C18 C13 122.1(4) . . ?
C17 C18 H18 118.9 . . ?
C13 C18 H18 118.9 . . ?
C20 C19 O4 112.8(11) . . ?
C20 C19 H19A 109.0 . . ?
O4 C19 H19A 109.0 . . ?
C20 C19 H19B 109.0 . . ?
O4 C19 H19B 109.0 . . ?
H19A C19 H19B 107.8 . . ?
C19 C20 H20A 109.5 . . ?
C19 C20 H20B 109.5 . . ?
H20A C20 H20B 109.5 . . ?
C19 C20 H20C 109.5 . . ?
H20A C20 H20C 109.5 . . ?
H20B C20 H20C 109.5 . . ?
 
loop_
 _geom_hbond_atom_site_label_D 
 _geom_hbond_atom_site_label_H 
 _geom_hbond_atom_site_label_A 
 _geom_hbond_distance_DH 
 _geom_hbond_distance_HA 
 _geom_hbond_distance_DA 
 _geom_hbond_angle_DHA 
 _geom_hbond_site_symmetry_A 
N3 H3B N2  0.95 1.93 2.730(5) 140.3 .
 
_refine_diff_density_max    0.257
_refine_diff_density_min   -0.365
_refine_diff_density_rms    0.051

_shelx_res_file
;

    SD-45.res created by SHELXL-2014/7


TITL SD-45
CELL 0.71073 10.305 10.502 18.603 90 92.716 90
ZERR 4        0.002  0.002  0.003  0  0.016  0
LATT 1
SYMM 1/2-x,1/2+y,1/2-z
SFAC C H N O V
UNIT 84 80 12 16 4
LIST 6 ! automatically inserted. Change 6 to 4 for CHECKCIF!!
L.S. 10
OMIT -3 50
BOND $H
ACTA
rem DFIX 0.95 0.0001 N3 H3A N3 H3B
rem DFIX 1.646  0.0001 H3a H3b
FMAP 2
PLAN 5
SIZE 0.37  0.18  0.06
HTAB N3 N2
WGHT    0.073000
EXTI    0.007013
FVAR       0.48764
V1    5    0.074029    0.761088    0.444223    11.00000    0.09926    0.06739 =
         0.08140    0.00140    0.01702   -0.01527
O1    4    0.050779    0.852762    0.525014    11.00000    0.06529    0.08083 =
         0.07555    0.00202    0.01136   -0.00827
O2    4    0.044883    0.771142    0.342929    11.00000    0.10653    0.07751 =
         0.07561    0.00086    0.01201   -0.03020
O3    4    0.198074    0.675855    0.458731    11.00000    0.15466    0.08008 =
         0.12867    0.02491    0.04869    0.03770
O4    4   -0.062531    0.669078    0.448529    11.00000    0.20376    0.14969 =
         0.09860   -0.02325    0.03964   -0.12980
N1    3    0.169697    0.926647    0.414161    11.00000    0.06179    0.06548 =
         0.07140    0.00092    0.00467   -0.00033
N2    3    0.165617    0.952926    0.340546    11.00000    0.06873    0.07120 =
         0.06913    0.00165    0.00835   -0.00763
N3    3    0.230747    1.036375    0.208039    11.00000    0.09874    0.10106 =
         0.08593    0.01617    0.00369   -0.03169

AFIX   3
H3A   2    0.285094    1.090010    0.181416    11.00000   -1.20000
H3B   2    0.242081    1.031970    0.258955    11.00000   -1.20000
AFIX   0
C1    1    0.137404    0.921496    0.564989    11.00000    0.06008    0.07058 =
         0.07456    0.00428    0.00590    0.00600
C2    1    0.123894    0.919266    0.640154    11.00000    0.07635    0.09211 =
         0.07639    0.00350    0.01265    0.00138
AFIX  43
H2    2    0.059629    0.869773    0.659777    11.00000   -1.20000
AFIX   0
C3    1    0.205126    0.989663    0.683457    11.00000    0.09256    0.10220 =
         0.06912    0.00339    0.00052    0.00827
AFIX  43
H3    2    0.194149    0.989853    0.732790    11.00000   -1.20000
AFIX   0
C4    1    0.306182    1.062860    0.655546    11.00000    0.07466    0.08376 =
         0.08290   -0.00365   -0.00221    0.00181
C5    1    0.393269    1.130357    0.702072    11.00000    0.10942    0.11878 =
         0.08994   -0.00767   -0.01890   -0.00969
AFIX  43
H5    2    0.379285    1.132522    0.751079    11.00000   -1.20000
AFIX   0
C6    1    0.496668    1.191963    0.676822    11.00000    0.10823    0.12478 =
         0.10813   -0.00341   -0.02705   -0.02227
AFIX  43
H6    2    0.552574    1.237195    0.708127    11.00000   -1.20000
AFIX   0
C7    1    0.518988    1.187462    0.604254    11.00000    0.07437    0.08582 =
         0.11587   -0.00280   -0.00987   -0.00677
AFIX  43
H7    2    0.591733    1.227811    0.587185    11.00000   -1.20000
AFIX   0
C8    1    0.434801    1.123861    0.556586    11.00000    0.06477    0.07715 =
         0.09674   -0.00435   -0.00006   -0.00340
AFIX  43
H8    2    0.452203    1.121589    0.508004    11.00000   -1.20000
AFIX   0
C9    1    0.322884    1.062325    0.580426    11.00000    0.06698    0.06953 =
         0.07586   -0.00484    0.00150    0.00292
C10   1    0.229788    0.996747    0.533405    11.00000    0.06355    0.05703 =
         0.07159    0.00069    0.00087    0.00589
C21   1    0.260918    1.139286    0.421991    11.00000    0.08876    0.07253 =
         0.08818    0.00774   -0.00172   -0.01708
AFIX 137
H21A  2    0.336917    1.125963    0.395036    11.00000   -1.50000
H21B  2    0.279310    1.201731    0.458760    11.00000   -1.50000
H21C  2    0.191047    1.168845    0.390325    11.00000   -1.50000
AFIX   0
C11   1    0.222458    1.015880    0.456261    11.00000    0.05994    0.06337 =
         0.07159    0.00096    0.00543   -0.00133
C12   1    0.098435    0.864771    0.305862    11.00000    0.06819    0.06917 =
         0.08107    0.00011    0.01220   -0.00999
C13   1    0.072143    0.869229    0.228498    11.00000    0.06736    0.06799 =
         0.07162   -0.00016    0.00428   -0.00002
C14   1    0.136274    0.953194    0.183389    11.00000    0.07725    0.06401 =
         0.08063   -0.00298    0.00225    0.00204
C15   1    0.099136    0.952722    0.109471    11.00000    0.10175    0.07460 =
         0.07559    0.00547    0.00432    0.00452
AFIX  43
H15   2    0.141182    1.006783    0.078535    11.00000   -1.20000
AFIX   0
C16   1    0.003443    0.875192    0.082425    11.00000    0.10343    0.07714 =
         0.08654   -0.00388   -0.00914    0.00892
AFIX  43
H16   2   -0.020526    0.878557    0.033633    11.00000   -1.20000
AFIX   0
C17   1   -0.058714    0.791461    0.126400    11.00000    0.08610    0.08875 =
         0.08966   -0.01541   -0.00669    0.00140
AFIX  43
H17   2   -0.123791    0.738012    0.107599    11.00000   -1.20000
AFIX   0
C18   1   -0.023007    0.788394    0.198111    11.00000    0.08061    0.07880 =
         0.08182   -0.00796    0.00515   -0.00948
AFIX  43
H18   2   -0.063422    0.730574    0.227606    11.00000   -1.20000
AFIX   0
C19   1   -0.162978    0.595639    0.424233    11.00000    0.23694    0.12730 =
         0.19884   -0.01590    0.03523   -0.01694
AFIX  23
H19A  2   -0.210727    0.566829    0.464887    11.00000   -1.20000
H19B  2   -0.221442    0.646591    0.393631    11.00000   -1.20000
AFIX   0
C20   1   -0.126451    0.498584    0.388743    11.00000    0.48679    0.22530 =
         0.13547   -0.02688    0.06479   -0.19610
AFIX 137
H20A  2   -0.079538    0.526443    0.348238    11.00000   -1.20000
H20B  2   -0.201240    0.450564    0.372095    11.00000   -1.20000
H20C  2   -0.071193    0.445991    0.419290    11.00000   -1.20000
AFIX   0
HKLF 4

REM  SD-45
REM R1 =  0.0497 for    1625 Fo > 4sig(Fo)  and  0.1224 for all    3549 data
REM    265 parameters refined using      0 restraints

END

WGHT      0.0720      0.0000

REM Highest difference peak  0.257,  deepest hole -0.365,  1-sigma level  0.051
Q1    1  -0.1415  0.6636  0.4410  11.00000  0.05    0.26
Q2    1  -0.2607  0.5430  0.4180  11.00000  0.05    0.25
Q3    1   0.2156  0.9565  0.4399  11.00000  0.05    0.20
Q4    1   0.0762  0.7672  0.5274  11.00000  0.05    0.19
Q5    1   0.0354  0.6186  0.4445  11.00000  0.05    0.17
;
_shelx_res_checksum   92949

_shelx_hkl_file
;
 -12  -3   2   -4.49    8.91   0-0.46974-0.35690-0.21611 0.00766-0.87603 0.91820
 -12  -2   2   -0.33   10.66   0-0.47088-0.35379-0.21933 0.07909-0.87464 0.91633
 -12   1   1    2.62    8.34   0-0.47267-0.35174-0.22441 0.28948-0.87244 0.87508
 -11  -4   3   -2.74    6.94   0-0.47799-0.27586-0.23973-0.03574-0.86558 0.94794
 -11  -3   3    2.19    7.19   0-0.47799-0.27582-0.23973 0.03207-0.86558 0.94822
 -11   0   2    1.47    9.33   0-0.46886-0.28746-0.21364 0.21167-0.87708 0.92157
 -10  -6   3   -2.78    7.14   0-0.47630-0.20815-0.23483-0.17584-0.86780 0.95208
 -10  -5   3   -7.78    9.83   0-0.47088-0.21331-0.21933-0.12348-0.87464 0.95897
 -10  -2   3    2.27    9.48   0-0.46804-0.21798-0.21136 0.07412-0.87804 0.96322
 -10  -1   3    2.59    6.60   0-0.47513-0.21064-0.23144 0.16198-0.86933 0.95466
 -10   1   2   -0.89    9.40   0-0.46736-0.21965-0.20946 0.27546-0.87884 0.92639
  -9  -8   2    7.35    8.65   0-0.46967-0.15010-0.21592-0.32797-0.87611 0.92468
  -9  -7   3    5.34    7.17   0-0.47721-0.14066-0.23747-0.23842-0.86661 0.95350
  -9  -6   3   -7.80    9.38   0-0.47007-0.14764-0.21705-0.19110-0.87562 0.96280
  -9   0   3    1.67    7.22   0-0.47656-0.13994-0.23559 0.23411-0.86746 0.95591
  -9   5  -1    0.92   13.22   0-0.46405-0.16112-0.20028 0.53959-0.88263 0.82013
  -9   7  -4    2.62   10.44   0-0.46622-0.16749-0.20629 0.68383-0.88016 0.70401
  -8  -9   2  -11.46    7.68   0-0.47656-0.07147-0.23559-0.37781-0.86746 0.91822
  -8  -7   3   -5.01    7.35   0-0.47368-0.07248-0.22728-0.25047-0.87118 0.96078
  -8  -4   4    8.46    7.54   0-0.47864-0.06795-0.24162-0.03062-0.86471 0.99337
  -8  -3   4    4.19    7.61   0-0.47902-0.06756-0.24275 0.03822-0.86419 0.99334
  -8   2   2    0.72    9.86   0-0.47128-0.07806-0.22047 0.35504-0.87415 0.92843
  -8   6  -2    1.23   12.13   0-0.46518-0.09240-0.20340 0.61052-0.88135 0.78360
  -7 -10   1    5.72    7.21   0-0.47275-0.01093-0.22463-0.45452-0.87234 0.88806
  -7  -9   2   -1.05    6.78   0-0.47539-0.00351-0.23219-0.38078-0.86899 0.92254
  -7  -7   3  -14.24    8.46   0-0.47155-0.00431-0.22122-0.25478-0.87383 0.96518
  -7  -4   4   -0.37    6.91   0-0.47708 0.00193-0.23710-0.03695-0.86678 0.99839
  -7  -3   4   -4.19    6.52   0-0.47708 0.00192-0.23710 0.03076-0.86678 0.99880
  -7   6  -2   -1.55    9.27   0-0.47208-0.01459-0.22274 0.62710-0.87317 0.77933
  -7   9  -8   -2.73    6.88   0-0.47499-0.02100-0.23106 0.83742-0.86950 0.54719
  -6 -11   0    3.15    7.30   0-0.47328 0.05988-0.22614-0.52202-0.87168 0.85092
  -6 -10   1  -10.11    6.92   0-0.47341 0.06182-0.22652-0.45383-0.87151 0.88930
  -6  -9   2   -3.72    7.34   0-0.47630 0.06645-0.23483-0.37780-0.86780 0.92426
  -6  -7   3   18.14    7.56   0-0.47315 0.06234-0.22577-0.24896-0.87184 0.96747
  -6  -4   4   -1.38    6.93   0-0.47889 0.07275-0.24237-0.03138-0.86437 0.99893
  -6  -3   4    0.78    7.16   0-0.47915 0.07303-0.24312 0.03710-0.86402 0.99895
  -6   2   2    1.39   11.66   0-0.46361 0.05160-0.19909 0.33459-0.88311 0.94334
  -6   6  -2  -11.18    9.99   0-0.47115 0.05460-0.22009 0.62380-0.87432 0.78328
  -6   9  -8    2.51    7.14   0-0.47447 0.04775-0.22955 0.83611-0.87017 0.55072
  -5 -11   0    0.99    7.21   0-0.47591 0.13151-0.23370-0.51419-0.86831 0.85055
  -5 -10   1   -1.62    6.90   0-0.47617 0.13361-0.23446-0.44545-0.86797 0.88860
  -5  -9   2    6.37    7.44   0-0.47928 0.13551-0.24350-0.36730-0.86384 0.92381
  -5  -7   3    5.08    7.29   0-0.47682 0.13510-0.23634-0.23871-0.86712 0.96568
  -5   0   3   -1.56    8.42   0-0.47552 0.13694-0.23257 0.22996-0.86882 0.96923
  -5   5  -1    6.12    8.54   0-0.47630 0.13043-0.23483 0.57271-0.86780 0.81609
  -5   7  -4   -7.95    7.38   0-0.47656 0.12591-0.23559 0.70703-0.86746 0.70308
  -5   8  -6    1.89    7.07   0-0.47682 0.12276-0.23634 0.77553-0.86712 0.62667
  -5   9  -8   -1.75    9.60   0-0.47088 0.11328-0.21933 0.82683-0.87464 0.55819
  -4  -8   2   78.32    7.36   0-0.47368 0.19850-0.22728-0.31369-0.87118 0.93496
  -4  -6   3    7.81    7.61   0-0.47552 0.20301-0.23257-0.17455-0.86882 0.97057
  -4  -1   3  309.20   15.02   0-0.47275 0.20065-0.22463 0.15820-0.87234 0.97499
  -4   8  -6   -3.03   10.12   0-0.47034 0.18550-0.21781 0.75641-0.87530 0.63745
  -4   9  -9    1.26    6.65   0-0.47669 0.18671-0.23596 0.84299-0.86729 0.51536
  -3 -12  -2    1.17    7.58   0-0.47656 0.26663-0.23559-0.57916-0.86746 0.77862
  -3 -11  -1    1.31    7.52   0-0.47381 0.26574-0.22766-0.51930-0.87101 0.82066
  -3 -10   0   -4.14    7.71   0-0.47341 0.26717-0.22652-0.45249-0.87151 0.85955
  -3  -9   1   54.92    7.58   0-0.47604 0.26794-0.23408-0.37529-0.86814 0.89640
  -3  -7   2   54.51    9.78   0-0.47188 0.26600-0.22215-0.25095-0.87342 0.94018
  -3  -4   3  982.01   14.37   0-0.47734 0.27354-0.23785-0.03192-0.86644 0.97190
  -3  -3   3   -5.48    8.84   0-0.47734 0.27676-0.23785 0.03289-0.86644 0.97134
  -3   7  -5   -4.46    7.20   0-0.47604 0.26193-0.23408 0.70616-0.86814 0.67125
  -3   8  -7   -3.76    7.73   0-0.47486 0.25739-0.23068 0.77058-0.86967 0.59672
  -3   9 -10   -3.46    6.95   0-0.47838 0.25588-0.24086 0.84836-0.86506 0.47780
  -2 -12  -3    4.74    7.47   0-0.47288 0.32758-0.22501-0.58930-0.87217 0.74916
  -2  -9   0   80.46    9.78   0-0.46946 0.32818-0.21532-0.39373-0.87636 0.87011
  -2  -8   1  110.80    8.36   0-0.47473 0.33522-0.23030-0.31059-0.86983 0.90156
  -2  -6   2   24.51    7.86   0-0.47630 0.33980-0.23483-0.17186-0.86780 0.93749
  -2  -1   2  967.25   22.25   0-0.47421 0.33802-0.22879 0.16216-0.87051 0.94118
  -2   6  -4  266.69    9.53   0-0.47499 0.32644-0.23106 0.63830-0.86950 0.71311
  -2   7  -6  -34.69    8.71   0-0.47889 0.33221-0.24237 0.71483-0.86437 0.63212
  -2   8  -8   -8.52    7.64   0-0.47604 0.32599-0.23408 0.77401-0.86814 0.55978
  -2   9 -11    2.42    6.68   0-0.47734 0.32226-0.23785 0.84532-0.86644 0.44378
  -1 -12  -4    3.89    9.89   0-0.47112 0.39304-0.22000-0.59343-0.87435 0.71561
  -1  -8   0   19.86    9.76   0-0.46981 0.39900-0.21630-0.32587-0.87595 0.87176
  -1  -7   1   85.18    8.57   0-0.47941 0.40997-0.24387-0.22941-0.86367 0.89831
  -1   6  -5   -7.86    8.29   0-0.47617 0.40011-0.23446 0.63904-0.86797 0.67630
  -1   7  -7   -1.12    7.55   0-0.47786 0.39854-0.23936 0.71195-0.86575 0.59809
  -1   8  -9    1.29    7.53   0-0.47381 0.39117-0.22766 0.76797-0.87101 0.52728
  -1   9 -12    2.05    7.25   0-0.47354 0.38592-0.22690 0.83490-0.87134 0.41330
   0 -12  -5   -2.55    7.81   0-0.47288 0.46475-0.22501-0.58861-0.87217 0.67753
   0  -7   0   -2.19    6.88   0-0.47734 0.47830-0.23785-0.23687-0.86644 0.86399
   0   6  -6  -10.40    8.25   0-0.47275 0.46403-0.22463 0.62973-0.87234 0.64531
   0   7  -8    6.01    7.53   0-0.47368 0.46207-0.22728 0.70053-0.87118 0.56673
   0   8 -11    4.72    7.28   0-0.47773 0.46151-0.23898 0.77978-0.86592 0.44698
   0   9 -15    5.34    7.48   0-0.47825 0.45584-0.24049 0.84884-0.86523 0.29353
   0   9 -14    1.83    7.93   0-0.47341 0.45153-0.22652 0.83478-0.87151 0.33986
   1 -12  -6   -1.96    7.99   0-0.47734 0.53636-0.23785-0.57523-0.86644 0.63650
   1 -11  -5    0.88    9.84   0-0.47061 0.52910-0.21857-0.52687-0.87497 0.68411
   1  -8  -2   88.21   10.48   0-0.47011 0.53293-0.21716-0.32421-0.87558 0.80178
   1  -7  -1   98.50    7.75   0-0.47928 0.54387-0.24350-0.23012-0.86384 0.82811
   1   5  -6   93.12    7.94   0-0.47734 0.53407-0.23785 0.57826-0.86644 0.64197
   1   7 -10   -7.67    7.24   0-0.47682 0.53052-0.23634 0.70942-0.86712 0.49049
   1   8 -13    8.99    7.61   0-0.47643 0.52611-0.23521 0.77621-0.86763 0.37512
   1   8 -12   -5.60    9.25   0-0.47075 0.52106-0.21895 0.75657-0.87481 0.42196
   1   9 -16   -2.88    9.21   0-0.47001 0.51327-0.21686 0.82326-0.87570 0.27148
   2 -11  -6    4.34    7.64   0-0.47876 0.60494-0.24199-0.50389-0.86454 0.63859
   2 -10  -5    0.19    7.77   0-0.47447 0.60431-0.22955-0.44734-0.87017 0.68171
   2  -9  -4   41.06    7.96   0-0.47368 0.60241-0.22728-0.38289-0.87118 0.72306
   2  -8  -3   11.89    7.56   0-0.47734 0.60899-0.23785-0.30437-0.86644 0.75587
   2  -6  -2   13.27    7.91   0-0.47473 0.60738-0.23030-0.17642-0.86983 0.79861
   2   1  -3    1.62   13.24   0-0.47656 0.60999-0.23559 0.30341-0.86746 0.75879
   2   4  -6   13.11   10.08   0-0.47513 0.60424-0.23144 0.50215-0.86933 0.64659
   2   6  -9   10.64    9.62   0-0.46940 0.59423-0.21516 0.62132-0.87643 0.53938
   2   7 -12   -5.86    6.99   0-0.47473 0.59413-0.23030 0.70372-0.86983 0.41962
   2   8 -17   -4.12    7.49   0-0.47928 0.59052-0.24350 0.78467-0.86384 0.22287
   2   8 -16    7.85    7.33   0-0.47565 0.58955-0.23295 0.77383-0.86865 0.26432
   2   8 -15    3.11    9.52   0-0.47075 0.58678-0.21895 0.76086-0.87481 0.30862
   3 -11  -8   10.27    7.54   0-0.47747 0.66944-0.23823-0.50767-0.86626 0.56675
   3 -10  -7   -1.10   10.81   0-0.47101 0.66525-0.21971-0.45887-0.87448 0.61363
   3  -7  -4   11.24    7.84   0-0.47513 0.67401-0.23144-0.24304-0.86933 0.72403
   3  -4  -3 1175.94   25.04   0-0.47081 0.66951-0.21913-0.05163-0.87473 0.76834
   3  -3  -3   -0.33   13.43   0-0.47142 0.67381-0.22084 0.01844-0.87399 0.76659
   3   4  -8   -0.91    7.71   0-0.47682 0.67160-0.23634 0.50714-0.86712 0.57142
   3   5 -10    1.85    7.48   0-0.47941 0.67069-0.24387 0.58200-0.86367 0.49201
   3   6 -12  -10.25    7.50   0-0.47578 0.66398-0.23332 0.63925-0.86848 0.42077
   3   7 -16   -4.36    7.30   0-0.47864 0.66038-0.24162 0.71527-0.86471 0.26450
   3   7 -15   -3.41    7.35   0-0.47407 0.65736-0.22841 0.70194-0.87067 0.30870
   4 -10  -9   -3.83    9.60   0-0.47222 0.73178-0.22312-0.45110-0.87300 0.53809
   4  -7  -6    0.08   10.22   0-0.47021 0.73517-0.21743-0.25685-0.87546 0.65618
   4  -5  -5   20.55   10.93   0-0.47051 0.73584-0.21829-0.12242-0.87509 0.69573
   4   4 -10  -18.01    9.43   0-0.47142 0.73248-0.22084 0.49258-0.87399 0.50419
   4   5 -12    7.31    9.67   0-0.47182 0.72960-0.22198 0.56028-0.87350 0.42735
   4   6 -16    5.72    7.38   0-0.47786 0.72934-0.23936 0.64492-0.86575 0.26686
   4   6 -15   -7.13    7.82   0-0.47288 0.72502-0.22501 0.63118-0.87217 0.31273
   5  -8  -9   -1.18    8.07   0-0.47552 0.80574-0.23257-0.30795-0.86882 0.53713
   5  -2  -7   -2.41   11.08   0-0.47182 0.80593-0.22198 0.08763-0.87350 0.61964
   5   0  -8   -2.47    7.98   0-0.47499 0.80720-0.23106 0.23197-0.86950 0.57812
   5   1  -9   -2.06    7.25   0-0.47851 0.80903-0.24124 0.30972-0.86489 0.53568
   5   2 -10    1.77    6.56   0-0.47565 0.80522-0.23295 0.36839-0.86865 0.50126
   5   3 -11   -0.09    9.81   0-0.47075 0.79713-0.21895 0.42107-0.87481 0.46959
   5   4 -14    0.64    7.08   0-0.47889 0.80149-0.24237 0.51366-0.86437 0.34530
   5   4 -13    3.37   10.03   0-0.47092 0.79612-0.21943 0.49016-0.87460 0.39289
   5   5 -17  -11.45    7.75   0-0.47708 0.79476-0.23710 0.57595-0.86678 0.23347
   5   5 -16  -10.30    9.13   0-0.47162 0.79262-0.22141 0.56174-0.87374 0.27749
   6  -1 -10   -7.64   10.69   0-0.47061 0.86817-0.21857 0.15219-0.87497 0.50990
   6   0 -11    1.57    7.29   0-0.47708 0.87363-0.23710 0.23701-0.86678 0.46364
   6   1 -12    9.02    7.23   0-0.47604 0.87106-0.23408 0.30164-0.86814 0.42699
   6   2 -13    6.13   10.17   0-0.47115 0.86460-0.22009 0.35525-0.87432 0.39516
   6   3 -16   -1.60    6.92   0-0.47786 0.86621-0.23936 0.44348-0.86575 0.27282
   6   3 -15   -0.28   10.03   0-0.47115 0.86163-0.22009 0.42446-0.87432 0.31952
   6   4 -18    1.64   10.26   0-0.47088 0.85614-0.21933 0.49115-0.87464 0.20563
   7  -4 -13   -1.64   10.63   0-0.47014 0.93165-0.21724-0.05172-0.87554 0.39814
   7  -3 -13   -1.51   11.24   0-0.47168 0.93384-0.22160 0.02022-0.87366 0.39647
   7  -2 -13   -2.85   10.36   0-0.46899 0.92907-0.21402 0.08058-0.87692 0.40081
   7  -1 -14    1.91    7.50   0-0.47499 0.93560-0.23106 0.16304-0.86950 0.35434
   7   0 -15    3.95    8.43   0-0.47460 0.93374-0.22992 0.22957-0.87000 0.31682
   7   1 -17    2.07    7.30   0-0.47695 0.93215-0.23672 0.30585-0.86695 0.23820
   7   1 -16    4.11   10.41   0-0.47007 0.92783-0.21705 0.28438-0.87562 0.28440
   7   2 -18  -11.77    8.78   0-0.46967 0.92130-0.21592 0.35198-0.87611 0.21079
 -12   2   0    0.42    4.55   0-0.45506-0.37838-0.18763 0.31839-0.89530 0.83978
 -11  -6   2    7.22    7.59   0-0.46241-0.29194-0.20823-0.20163-0.88689 0.91620
 -11  -5   2   -5.01    7.93   0-0.45589-0.29660-0.18992-0.15444-0.89439 0.92289
 -11  -1   2    1.80    7.02   0-0.45506-0.30509-0.18763 0.12244-0.89530 0.92146
 -11   3   0    0.38    5.34   0-0.45616-0.30780-0.19069 0.39212-0.89408 0.84119
 -10  -7   2   -6.04    7.09   0-0.46148-0.22097-0.20557-0.27410-0.88800 0.92265
 -10  -6   2   -0.22    8.76   0-0.45478-0.23343-0.18686-0.22367-0.89560 0.93160
 -10  -4   3    3.18    7.41   0-0.46268-0.22179-0.20899-0.06487-0.88656 0.95724
 -10  -3   3    1.94    6.99   0-0.46107-0.22184-0.20443-0.00401-0.88848 0.95872
 -10   7  -4   -2.11   10.95   0-0.45276-0.24569-0.18130 0.65169-0.89777 0.69353
  -9  -7   2   -4.49   10.21   0-0.45520-0.16066-0.18801-0.28856-0.89515 0.93467
  -9  -5   3   12.97    7.91   0-0.45904-0.15595-0.19871-0.14262-0.89084 0.96683
  -9  -4   3    7.34   10.17   0-0.45506-0.16181-0.18763-0.08540-0.89530 0.97152
  -9  -1   3   -3.15    7.30   0-0.45768-0.15742-0.19489 0.12233-0.89240 0.96632
  -9   6  -2   -0.69    4.84   0-0.45506-0.16899-0.18763 0.58659-0.89530 0.77312
  -8  -9   1   -5.78    7.15   0-0.45699-0.08754-0.19298-0.42130-0.89317 0.89986
  -8  -8   2  -11.63    7.72   0-0.46107-0.08235-0.20443-0.34193-0.88848 0.93267
  -8  -6   3    8.06    7.19   0-0.46107-0.08457-0.20443-0.20446-0.88848 0.96998
  -8  -5   3    3.53    9.88   0-0.45492-0.09356-0.18725-0.15254-0.89545 0.97744
  -8   0   3   -2.97    6.56   0-0.46134-0.08510-0.20519 0.20078-0.88816 0.96607
  -8   8  -5   -6.71   10.41   0-0.45178-0.11763-0.17863 0.71974-0.89880 0.66724
  -7 -10   0   -6.10    8.76   0-0.45464-0.02607-0.18648-0.49443-0.89575 0.87101
  -7  -9   1    2.65    9.31   0-0.45534-0.02311-0.18839-0.42379-0.89500 0.90695
  -7  -8   2   -5.78    7.54   0-0.45958-0.01484-0.20023-0.34584-0.89022 0.93923
  -7  -6   3   -0.23    6.72   0-0.45918-0.01472-0.19909-0.21143-0.89069 0.97670
  -7   0   3   -1.74   10.24   0-0.45561-0.02179-0.18916 0.18631-0.89469 0.97657
  -7   2   2    1.42   10.01   0-0.45431-0.02925-0.18556 0.32122-0.89611 0.93891
  -7   7  -3   -3.95   10.83   0-0.45506-0.03287-0.18763 0.65647-0.89530 0.74232
  -7   8  -5   -0.34   10.82   0-0.45325-0.05041-0.18265 0.72908-0.89725 0.66953
  -7   9  -7   -0.56   10.35   0-0.45346-0.05113-0.18322 0.79304-0.89703 0.59340
  -6 -11  -1    0.48    9.81   0-0.45534 0.04353-0.18839-0.55772-0.89500 0.83657
  -6 -10   0   -4.91    9.27   0-0.45506 0.04421-0.18763-0.49346-0.89530 0.87552
  -6  -9   1    1.50   10.35   0-0.45506 0.04135-0.18763-0.41966-0.89530 0.91246
  -6  -8   2   -0.10    7.21   0-0.46013 0.05482-0.20176-0.34374-0.88959 0.94310
  -6  -6   3  194.14    8.63   0-0.45972 0.05106-0.20061-0.20507-0.89006 0.98105
  -6   0   3    0.37    7.17   0-0.45836 0.05020-0.19680 0.19316-0.89162 0.97870
  -6   8  -5   -1.31   10.60   0-0.45623 0.02605-0.19088 0.73250-0.89401 0.67177
  -6   9  -7   -5.75   10.46   0-0.45171 0.01274-0.17843 0.79319-0.89888 0.59896
  -5 -11  -1    4.57    7.28   0-0.45781 0.11531-0.19527-0.55187-0.89224 0.83838
  -5 -10   0    0.95    8.87   0-0.45582 0.11570-0.18973-0.48689-0.89446 0.87735
  -5  -9   1    3.62    7.04   0-0.45822 0.11793-0.19642-0.41499-0.89178 0.91291
  -5  -8   2   -0.46    6.86   0-0.46308 0.12686-0.21014-0.33471-0.88608 0.94403
  -5  -6   3    4.55    7.74   0-0.46348 0.12509-0.21128-0.19653-0.88560 0.98087
  -5  -5   3  177.35   10.81   0-0.45588 0.11614-0.18990-0.14825-0.89440 0.98929
  -5   6  -2   39.18   10.54   0-0.45506 0.09981-0.18763 0.59499-0.89530 0.79493
  -5   8  -5    7.24   10.23   0-0.45438 0.09741-0.18576 0.72665-0.89603 0.67591
  -5   9  -7    9.14    8.93   0-0.45250 0.08932-0.18058 0.78959-0.89805 0.60178
  -4 -11  -1   -7.23    6.94   0-0.46215 0.19166-0.20747-0.54004-0.88721 0.83699
  -4 -10   0    6.07    7.60   0-0.46134 0.18899-0.20519-0.47376-0.88816 0.87647
  -4  -9   1    6.97    6.67   0-0.46335 0.19210-0.21090-0.40022-0.88576 0.91158
  -4  -7   2    4.04    7.30   0-0.45781 0.18725-0.19527-0.28037-0.89224 0.95502
  -4  -5   3    6.06    7.32   0-0.46388 0.19403-0.21242-0.12757-0.88511 0.98469
  -4  -4   3   19.58    7.87   0-0.45863 0.18845-0.19756-0.07438-0.89131 0.99024
  -4  -3   3   93.77   12.27   0-0.45572 0.18408-0.18946-0.01295-0.89457 0.99274
  -4  -2   3  730.01   14.75   0-0.45754 0.18554-0.19451 0.05968-0.89255 0.98992
  -4   4   0   13.78   11.22   0-0.45492 0.17404-0.18724 0.45761-0.89545 0.87553
  -4   5  -1  271.39   13.99   0-0.45395 0.17070-0.18456 0.52247-0.89650 0.83801
  -4   7  -4   -0.48    7.54   0-0.46295 0.17790-0.20976 0.68134-0.88624 0.71122
  -4   9  -8    0.37    7.17   0-0.46067 0.16819-0.20328 0.81061-0.88896 0.55997
  -4  10 -11    0.23    7.20   0-0.46107 0.16332-0.20443 0.87977-0.88848 0.44430
  -3 -12  -3    3.57    7.66   0-0.45945 0.25526-0.19985-0.61492-0.89037 0.76910
  -3 -11  -2   -2.76   10.38   0-0.45499 0.24931-0.18744-0.55830-0.89537 0.81296
  -3  -9   0   15.14    8.99   0-0.45367 0.24672-0.18380-0.42491-0.89680 0.89049
  -3  -8   1    7.54    7.08   0-0.45836 0.25576-0.19680-0.34642-0.89162 0.92157
  -3  -6   2  159.41    8.47   0-0.45685 0.25393-0.19260-0.21308-0.89332 0.96054
  -3   6  -3   -2.77   10.11   0-0.46362 0.24981-0.21166 0.61567-0.88544 0.75373
  -3   8  -6   19.07   10.54   0-0.45396 0.22899-0.18459 0.72920-0.89649 0.64854
  -3   9  -9   -1.80    7.08   0-0.46388 0.23903-0.21242 0.82031-0.88511 0.52259
  -3  10 -12    1.21    7.93   0-0.46215 0.23204-0.20747 0.88304-0.88721 0.40943
  -3  10 -11   -3.20   10.21   0-0.45360 0.21879-0.18361 0.86195-0.89688 0.45855
  -2 -12  -4   20.26   10.47   0-0.45486 0.31031-0.18707-0.62427-0.89552 0.74388
  -2 -11  -2  -12.95    7.72   0-0.46415 0.33002-0.21318-0.53330-0.88479 0.80572
  -2 -10  -1   11.60    7.30   0-0.46282 0.32707-0.20938-0.46916-0.88640 0.84594
  -2  -7   1   24.63    7.52   0-0.45754 0.32364-0.19451-0.27971-0.89255 0.92652
  -2  -5   2   51.83    7.83   0-0.46362 0.32943-0.21166-0.12578-0.88544 0.95665
  -2  -4   2  138.84    9.76   0-0.45713 0.32256-0.19336-0.07671-0.89301 0.96321
  -2  -2   2 1371.22   24.03   0-0.45506 0.31955-0.18763 0.05304-0.89530 0.96395
  -2   4  -1  682.66   18.32   0-0.45312 0.30908-0.18229 0.45377-0.89739 0.84787
  -2   7  -5   -3.32   10.10   0-0.45603 0.30463-0.19030 0.66507-0.89424 0.69089
  -2   8  -7  -10.04    8.38   0-0.45836 0.30626-0.19680 0.73703-0.89162 0.61065
  -2   9 -10   -3.33    7.44   0-0.46401 0.30672-0.21280 0.82074-0.88495 0.48880
  -2   9  -9   -4.64    9.00   0-0.45374 0.29331-0.18399 0.79320-0.89673 0.54022
  -2  10 -13   -0.53    7.74   0-0.46053 0.29802-0.20290 0.87878-0.88911 0.37775
  -2  10 -12   -3.34    9.43   0-0.45339 0.28627-0.18303 0.86065-0.89710 0.42598
  -1 -12  -5   -8.93    8.79   0-0.45395 0.38122-0.18456-0.62896-0.89650 0.70957
  -1 -11  -3   -1.06    7.25   0-0.46174 0.39497-0.20633-0.53948-0.88769 0.77503
  -1 -10  -2    2.55    7.14   0-0.45945 0.39383-0.19985-0.47830-0.89037 0.81527
  -1  -9  -1   30.57    7.11   0-0.46026 0.39258-0.20214-0.40770-0.88943 0.85356
  -1  -6   1   99.30    8.19   0-0.46401 0.39746-0.21280-0.19276-0.88495 0.92346
  -1  -5   1  520.39   13.79   0-0.45464 0.38807-0.18648-0.15138-0.89575 0.93422
  -1   3  -1   30.23   10.70   0-0.46148 0.38804-0.20557 0.40877-0.88800 0.84364
  -1   4  -2   14.65    9.44   0-0.46308 0.38854-0.21014 0.48140-0.88608 0.80234
  -1   5  -3  435.64   12.16   0-0.45809 0.37882-0.19604 0.53605-0.89193 0.76975
  -1   7  -6   -9.42    7.50   0-0.45809 0.37711-0.19604 0.66860-0.89193 0.65428
  -1   8  -8  -17.93    9.59   0-0.45630 0.36787-0.19107 0.73614-0.89393 0.57990
  -1   9 -11   -1.76    7.51   0-0.46107 0.37138-0.20443 0.81310-0.88848 0.45876
   0 -12  -6    6.62   10.55   0-0.45519 0.44958-0.18798-0.62512-0.89516 0.67488
   0 -11  -4    8.04    7.00   0-0.46228 0.46056-0.20785-0.53804-0.88705 0.74196
   0 -10  -3   -0.54    7.11   0-0.45904 0.46077-0.19871-0.47887-0.89084 0.78222
   0  -9  -2   13.96    6.85   0-0.45904 0.45954-0.19871-0.41156-0.89084 0.82083
   0  -8  -1   24.25    7.40   0-0.46295 0.46426-0.20976-0.33164-0.88624 0.85412
   0  -6   0  103.19    8.75   0-0.46026 0.46110-0.20214-0.20327-0.88943 0.89446
   0   3  -2  280.79   14.65   0-0.46415 0.45714-0.21318 0.41800-0.88479 0.80686
   0   4  -3  273.77   11.58   0-0.46335 0.45404-0.21090 0.48359-0.88576 0.76903
   0   5  -4  344.25   10.68   0-0.45754 0.44581-0.19451 0.53520-0.89255 0.73697
   0   7  -7   -5.35   10.95   0-0.45478 0.43558-0.18686 0.66428-0.89560 0.62436
   0   8 -10   -2.16    7.68   0-0.46401 0.44546-0.21280 0.75396-0.88495 0.49862
   0   8  -9   -1.42    9.44   0-0.45409 0.43274-0.18495 0.72644-0.89635 0.54952
   0   9 -13    0.03    7.59   0-0.46268 0.43902-0.20899 0.81814-0.88656 0.38504
   0   9 -12    3.57   10.26   0-0.45541 0.42787-0.18858 0.80077-0.89492 0.43287
   1 -12  -7   -5.96    7.80   0-0.46026 0.52564-0.20214-0.61067-0.88943 0.63437
   1 -10  -4    9.51    7.31   0-0.46228 0.52926-0.20785-0.47004-0.88705 0.74598
   1  -9  -3    2.28    7.45   0-0.46161 0.53180-0.20595-0.40342-0.88785 0.78326
   1  -6  -1  131.94    8.98   0-0.46161 0.52975-0.20595-0.19934-0.88785 0.85966
   1   3  -3  954.02   17.80   0-0.45822 0.51882-0.19642 0.40167-0.89178 0.78054
   1   4  -4  155.50   10.21   0-0.45768 0.51578-0.19489 0.46773-0.89240 0.74252
   1   6  -7  -31.36    9.34   0-0.46121 0.51722-0.20481 0.61063-0.88832 0.62227
   1   7  -9   -3.66    7.65   0-0.46134 0.51393-0.20519 0.67914-0.88816 0.54519
   1   8 -11    9.99    9.04   0-0.45520 0.49764-0.18800 0.73805-0.89515 0.47458
   1   9 -15   -6.34    7.69   0-0.45999 0.50231-0.20138 0.81092-0.88975 0.31641
   1   9 -14  -15.65   10.12   0-0.45471 0.49239-0.18667 0.79890-0.89568 0.36203
   2 -11  -7   -4.91    7.46   0-0.45958 0.59330-0.20023-0.54397-0.89022 0.63906
   2 -10  -6    0.57    9.15   0-0.45311 0.58645-0.18227-0.49530-0.89740 0.68508
   2  -7  -3   30.83   10.13   0-0.45494 0.58860-0.18731-0.28586-0.89543 0.79682
   2  -5  -2   77.78   11.51   0-0.45518 0.59002-0.18796-0.14948-0.89517 0.83198
   2   5  -7  -10.50    8.52   0-0.46161 0.58705-0.20595 0.54447-0.88785 0.62694
   2   7 -11    0.98    6.94   0-0.46161 0.57997-0.20595 0.68006-0.88785 0.47310
   2   8 -14   -0.46    7.37   0-0.46094 0.57431-0.20404 0.74616-0.88864 0.35872
   2   8 -13   -8.48   10.07   0-0.45492 0.56440-0.18724 0.73139-0.89545 0.40503
   3 -11  -9   -2.13   10.22   0-0.45685 0.65267-0.19260-0.54929-0.89332 0.57216
   3  -9  -6   -1.45    7.61   0-0.46188 0.66505-0.20671-0.40140-0.88753 0.67780
   3  -8  -5   95.10    8.16   0-0.46295 0.66279-0.20976-0.33206-0.88624 0.71773
   3   2  -5  494.87   13.55   0-0.45713 0.65337-0.19336 0.33230-0.89301 0.71557
   3   3  -6  129.68    9.49   0-0.45863 0.65234-0.19756 0.40460-0.89131 0.67502
   3   4  -7  704.04   15.13   0-0.45506 0.64614-0.18763 0.46250-0.89530 0.63990
   3   5  -9  -16.86    8.29   0-0.46241 0.65372-0.20823 0.54726-0.88689 0.55424
   3   6 -11   -6.34    7.25   0-0.46188 0.64992-0.20671 0.61384-0.88753 0.47795
   3   7 -14   -1.91    7.39   0-0.46348 0.64638-0.21128 0.68612-0.88560 0.36088
   3   7 -13   -0.86    7.91   0-0.45685 0.64116-0.19260 0.66725-0.89332 0.40681
   3   8 -17    2.02    7.61   0-0.45768 0.63531-0.19489 0.73728-0.89240 0.25252
   4 -10 -10   -9.51   10.16   0-0.45157 0.71586-0.17805-0.49789-0.89903 0.54360
   4  -9  -8   -6.06    8.06   0-0.46255 0.73167-0.20861-0.39912-0.88673 0.60551
   4  -8  -7    1.19    9.31   0-0.46053 0.72935-0.20290-0.33859-0.88911 0.64596
   4  -1  -5    0.07   12.81   0-0.45506 0.72267-0.18763 0.12085-0.89530 0.72368
   4   1  -6  294.46   14.36   0-0.45506 0.71928-0.18763 0.25970-0.89530 0.68501
   4   2  -7   -1.72    8.27   0-0.45999 0.72506-0.20138 0.33807-0.88975 0.63969
   4   3  -8  -27.86   12.06   0-0.45863 0.72129-0.19756 0.40170-0.89131 0.60258
   4   5 -11   -8.56    7.11   0-0.45699 0.71441-0.19298 0.53276-0.89317 0.48878
   4   6 -14  -14.38    7.25   0-0.46188 0.71418-0.20671 0.61423-0.88753 0.36803
   4   6 -13    7.07    9.69   0-0.45506 0.70685-0.18763 0.59612-0.89530 0.41369
   4   7 -17   -2.31    7.73   0-0.45781 0.70523-0.19527 0.67078-0.89224 0.25753
   4   7 -16    2.16    8.79   0-0.45506 0.70219-0.18763 0.65870-0.89530 0.29967
   5  -9 -11   -5.38   12.18   0-0.44878 0.77708-0.17050-0.43388-0.90188 0.51332
   5  -4  -7    1.34   17.32   0-0.42792 0.76169-0.11617-0.15309-0.92037 0.67992
   5   2  -9  -27.04   10.20   0-0.45499 0.78225-0.18744 0.32482-0.89537 0.57495
   5   4 -12    5.37    7.82   0-0.45658 0.78260-0.19183 0.46379-0.89363 0.45555
   5   5 -15  -10.15    7.38   0-0.46201 0.78211-0.20709 0.54732-0.88737 0.33493
   5   5 -14    5.42    6.74   0-0.45534 0.77759-0.18839 0.52770-0.89500 0.37981
   5   6 -18   -6.82    7.64   0-0.45809 0.77321-0.19604 0.60412-0.89193 0.22433
   5   6 -17   -2.58    7.49   0-0.45506 0.76597-0.18763 0.59862-0.89530 0.26756
   6   1 -11  -23.07    8.17   0-0.45589 0.85285-0.18992 0.25993-0.89439 0.50166
   6   2 -12   -4.82    8.51   0-0.45506 0.84795-0.18763 0.32698-0.89530 0.46421
   6   3 -14   -3.91    7.00   0-0.45877 0.85038-0.19794 0.40339-0.89115 0.38273
   6   4 -17    4.57    7.34   0-0.46188 0.84939-0.20671 0.47857-0.88753 0.26303
   6   4 -16   -4.82    7.41   0-0.45644 0.84447-0.19145 0.46459-0.89378 0.30842
   7  -1 -13    0.66    7.25   0-0.45506 0.91815-0.18763 0.12296-0.89530 0.43226
   7   0 -14    4.70    7.72   0-0.45850 0.92101-0.19718 0.19839-0.89147 0.38916
   7   1 -15   -2.57    7.76   0-0.45672 0.91667-0.19222 0.26292-0.89347 0.35281
   7   2 -17   -0.31    7.15   0-0.45836 0.91476-0.19680 0.33521-0.89162 0.27400
 -12  -3   1    3.91    9.97   0-0.44329-0.39100-0.15769-0.04221-0.90596 0.89359
 -12  -2   1   -2.46   10.69   0-0.44302-0.39071-0.15700 0.02228-0.90621 0.89375
 -12  -1   1   -5.76    9.94   0-0.44491-0.38695-0.16200 0.09510-0.90440 0.89016
 -12   0   1    2.08    4.84   0-0.45440-0.37787-0.18771 0.19083-0.89462 0.87853
 -11  -4   2   -6.07    7.02   0-0.45314-0.30786-0.18426-0.08667-0.89598 0.92728
 -11  -3   2    2.21    7.46   0-0.45062-0.31079-0.17737-0.02579-0.89866 0.92908
 -11  -2   2    6.34    7.44   0-0.45118-0.31194-0.17890 0.04599-0.89807 0.92708
 -11   1   1   -0.27    9.94   0-0.44368-0.32136-0.15873 0.22692-0.90559 0.89497
 -10  -7   1   -2.69    6.80   0-0.44534-0.24673-0.16315-0.31095-0.90398 0.90407
 -10  -5   2   -2.42    7.19   0-0.44664-0.24383-0.16662-0.17237-0.90271 0.93916
 -10   0   2   -6.09    8.51   0-0.44455-0.24600-0.16104 0.16069-0.90475 0.93674
 -10   2   1   -0.58   10.42   0-0.43793-0.25674-0.14362 0.27911-0.91089 0.90427
 -10   6  -3    1.52    4.88   0-0.45440-0.25689-0.18771 0.60175-0.89462 0.73209
  -9  -8   1    4.29    6.81   0-0.44906-0.17495-0.17315-0.36639-0.90026 0.90533
  -9  -6   2    8.11    7.19   0-0.44606-0.17618-0.16508-0.23948-0.90328 0.94463
  -9  -3   3    5.64    7.13   0-0.45273-0.16814-0.18311-0.01868-0.89643 0.97331
  -9  -2   3    0.10    6.50   0-0.45356-0.16584-0.18541 0.04905-0.89553 0.97201
  -9   1   2    4.61   10.34   0-0.44347-0.18002-0.15817 0.22773-0.90579 0.94111
  -8  -9   0   -5.66    8.72   0-0.44237-0.11185-0.15526-0.45562-0.90683 0.87975
  -8  -8   1    2.68    8.76   0-0.44448-0.10983-0.16085-0.37923-0.90482 0.91456
  -8  -7   2    6.48    7.25   0-0.45076-0.10145-0.17775-0.29503-0.89851 0.94535
  -8  -4   3    1.24    7.06   0-0.44849-0.09973-0.17161-0.10038-0.90084 0.98291
  -8  -3   3   97.24   10.51   0-0.44480-0.10308-0.16172-0.04012-0.90450 0.98589
  -8  -2   3   -3.67    8.67   0-0.44382-0.10368-0.15911 0.02275-0.90545 0.98559
  -8  -1   3   -2.61    7.07   0-0.44935-0.10040-0.17391 0.10507-0.89997 0.97985
  -7  -8   1   12.48    9.19   0-0.44197-0.04182-0.15422-0.38638-0.90720 0.92164
  -7  -7   2   59.01    7.67   0-0.44821-0.03260-0.17084-0.30309-0.90113 0.95216
  -7  -5   3   18.89    7.28   0-0.45132-0.02782-0.17928-0.15767-0.89792 0.98530
  -7  -4   3   52.72    7.54   0-0.44520-0.03344-0.16277-0.10687-0.90412 0.99092
  -7  -1   3  130.67   11.91   0-0.44346-0.03591-0.15815 0.09206-0.90580 0.98971
  -6 -11  -2   -8.61    8.58   0-0.44237 0.02414-0.15526-0.59063-0.90683 0.81387
  -6  -8   1    0.69    9.02   0-0.44156 0.02786-0.15314-0.38742-0.90758 0.92622
  -6  -7   2   61.59    7.93   0-0.44835 0.03809-0.17123-0.30164-0.90099 0.95691
  -6  -5   3    1.81    7.18   0-0.45189 0.04388-0.18082-0.15932-0.89732 0.98900
  -6  -4   3    0.09    6.54   0-0.44505 0.03674-0.16238-0.10992-0.90426 0.99492
  -6  -1   3  308.76   13.88   0-0.44331 0.03287-0.15775 0.09137-0.90594 0.99415
  -6   7  -3    0.20    8.55   0-0.44302 0.01302-0.15700 0.63838-0.90621 0.76087
  -5 -11  -2    7.31    9.75   0-0.44325 0.09268-0.15760-0.58490-0.90600 0.81751
  -5  -8   1   36.72    9.09   0-0.44390 0.10115-0.15931-0.38151-0.90538 0.92819
  -5  -7   2  105.47    8.39   0-0.45118 0.11059-0.17890-0.29357-0.89807 0.95830
  -5  -4   3  327.26    9.87   0-0.44906 0.10895-0.17315-0.09681-0.90026 0.99537
  -5  -3   3  412.14   11.31   0-0.44491 0.10428-0.16200-0.04036-0.90440 0.99874
  -5  -2   3  226.02   12.56   0-0.44419 0.10305-0.16008 0.02552-0.90510 0.99843
  -5  -1   3    1.33    7.99   0-0.45048 0.10869-0.17698 0.10947-0.89880 0.99139
  -5   7  -3    6.89    9.60   0-0.44283 0.08461-0.15649 0.63364-0.90639 0.76451
  -5  10  -9   -0.50    9.37   0-0.44230 0.06770-0.15507 0.83573-0.90690 0.53720
  -4 -11  -2   -9.96    7.14   0-0.44750 0.16934-0.16892-0.57504-0.90185 0.81704
  -4 -10  -1   17.02    8.18   0-0.44505 0.16605-0.16238-0.51343-0.90426 0.85740
  -4  -9   0  162.01    8.32   0-0.44549 0.17063-0.16354-0.44509-0.90384 0.89386
  -4  -8   1  101.70    8.05   0-0.44920 0.17583-0.17353-0.36737-0.90012 0.92731
  -4  -6   2  312.30   10.00   0-0.44592 0.17369-0.16469-0.24068-0.90342 0.96703
  -4   6  -2   -2.19    9.66   0-0.44426 0.15774-0.16027 0.56871-0.90503 0.80791
  -4   8  -5   -4.87    9.86   0-0.44368 0.14929-0.15873 0.70358-0.90559 0.69323
  -4   9  -7   10.29   10.08   0-0.44390 0.14491-0.15931 0.77355-0.90538 0.61430
  -4  10 -10    0.76    7.57   0-0.44849 0.14044-0.17161 0.85395-0.90084 0.49710
  -3 -12  -4   -8.64    7.50   0-0.44549 0.23249-0.16354-0.64692-0.90384 0.74826
  -3 -10  -1   39.72    8.24   0-0.45203 0.24343-0.18120-0.49456-0.89718 0.85465
  -3  -7   1  342.71   11.65   0-0.44390 0.23942-0.15931-0.31380-0.90538 0.93615
  -3  -5   2  307.16    9.59   0-0.44621 0.24258-0.16546-0.17243-0.90313 0.97023
  -3   0   2   -0.25   15.14   0-0.44288 0.23966-0.15661 0.15492-0.90635 0.96933
  -3   7  -4   72.66    7.60   0-0.44878 0.22836-0.17238 0.64764-0.90055 0.73073
  -3   9  -8   -1.05    6.72   0-0.44977 0.21723-0.17506 0.78840-0.89953 0.57678
  -3  10 -10   -0.84    9.59   0-0.44244 0.20470-0.15545 0.83701-0.90676 0.50728
  -2 -12  -5    1.40    9.02   0-0.44302 0.29466-0.15700-0.65842-0.90621 0.71899
  -2 -11  -3    4.74    7.75   0-0.44878 0.30500-0.17238-0.57117-0.90055 0.78767
  -2 -10  -2   53.63    7.69   0-0.44563 0.30550-0.16392-0.51194-0.90370 0.82753
  -2  -9  -1   -6.68    7.50   0-0.44549 0.30870-0.16354-0.44569-0.90384 0.86411
  -2  -8   0   72.93    8.02   0-0.44906 0.31229-0.17315-0.36796-0.90026 0.89871
  -2  -6   1  107.10    9.86   0-0.44404 0.30846-0.15969-0.24564-0.90524 0.93978
  -2  -3   2   44.51   11.29   0-0.45300 0.31952-0.18388-0.01788-0.89613 0.96568
  -2   3   0 1421.17   26.50   0-0.44144 0.29987-0.15282 0.35651-0.90770 0.89681
  -2   5  -2  252.32   10.87   0-0.45048 0.30407-0.17698 0.51644-0.89880 0.81057
  -2   6  -3    0.80   10.15   0-0.44302 0.29456-0.15700 0.56623-0.90621 0.77863
  -2  10 -11   -1.06   10.25   0-0.44302 0.27278-0.15700 0.83957-0.90621 0.47324
  -1 -11  -4    8.36    7.25   0-0.44577 0.36941-0.16431-0.57887-0.90356 0.75702
  -1 -10  -3   14.40    8.66   0-0.44196 0.36810-0.15418-0.52282-0.90722 0.79790
  -1  -8  -1   78.90   10.05   0-0.44288 0.37350-0.15663-0.38430-0.90634 0.87141
  -1  -7   0  101.30    8.53   0-0.45020 0.38206-0.17622-0.29677-0.89910 0.90153
  -1  -4   1  217.85   14.79   0-0.44374 0.37656-0.15890-0.11075-0.90553 0.94296
  -1   6  -4  397.17   10.77   0-0.44864 0.36719-0.17199 0.58018-0.90070 0.73994
  -1   8  -7   11.59    9.81   0-0.44259 0.35359-0.15584 0.70105-0.90662 0.62958
  -1   9 -10   14.91    8.00   0-0.45048 0.35382-0.17698 0.79144-0.89880 0.50715
  -1  10 -13    2.34    7.56   0-0.44835 0.34287-0.17123 0.85461-0.90099 0.39659
   0 -11  -5    5.86    7.09   0-0.44592 0.43705-0.16469-0.57849-0.90342 0.72342
   0  -7  -1   30.14    7.24   0-0.44635 0.44567-0.16585-0.30748-0.90299 0.87139
   0  -5   0    2.65    8.15   0-0.44778 0.44925-0.16969-0.16917-0.90156 0.90599
   0   2  -1 2025.10   29.92   0-0.45104 0.44678-0.17852 0.31535-0.89821 0.85874
   0   6  -5  183.14    8.91   0-0.44835 0.43430-0.17123 0.57980-0.90099 0.70622
   0   9 -11    5.84    7.91   0-0.44635 0.41716-0.16585 0.78052-0.90299 0.47783
   1 -12  -8   -4.85    9.59   0-0.44302 0.49651-0.15700-0.64837-0.90621 0.61749
   1 -11  -6   -3.97    6.94   0-0.44963 0.51047-0.17468-0.56774-0.89968 0.68542
   1 -10  -5   -4.41    9.75   0-0.44317 0.50607-0.15738-0.51726-0.90607 0.72847
   1  -8  -3   26.03    9.11   0-0.44097 0.50587-0.15157-0.38973-0.90814 0.80554
   1  -7  -2    9.17    6.87   0-0.44764 0.51481-0.16931-0.30464-0.90171 0.83651
   1  -5  -1  534.34   13.15   0-0.44764 0.51545-0.16931-0.16838-0.90171 0.87323
   1   0  -1   -1.65   15.26   0-0.44678 0.51498-0.16700 0.16677-0.90257 0.86873
   1   2  -2 2768.77   30.67   0-0.44750 0.51054-0.16892 0.30595-0.90185 0.82914
   1   5  -5   10.02    7.46   0-0.45175 0.50810-0.18043 0.52116-0.89747 0.70785
   1   6  -6   73.09   10.89   0-0.44346 0.49676-0.15815 0.56719-0.90580 0.67760
   1   7  -8   60.18    7.82   0-0.44821 0.49662-0.17084 0.64874-0.90113 0.59589
   1   8 -10   -2.28    7.38   0-0.44621 0.48885-0.16546 0.71126-0.90313 0.52267
   1   9 -13    0.24    7.18   0-0.44735 0.48213-0.16854 0.78359-0.90199 0.40705
   2 -11  -8   12.25   10.24   0-0.44186 0.56577-0.15391-0.58822-0.90731 0.62184
   2  -9  -5   84.61    8.28   0-0.44707 0.57744-0.16777-0.44150-0.90228 0.72855
   2  -8  -4    7.98    7.51   0-0.44778 0.58017-0.16969-0.37120-0.90156 0.76567
   2  -4  -2  130.93   14.05   0-0.44130 0.57610-0.15246-0.11738-0.90783 0.84505
   2   3  -4  911.58   16.11   0-0.44649 0.57453-0.16623 0.37186-0.90285 0.75758
   2   4  -5   -2.17    7.94   0-0.44721 0.57343-0.16815 0.44000-0.90214 0.71835
   2   5  -6   36.01   10.33   0-0.44301 0.56652-0.15695 0.49855-0.90623 0.68203
   2   6  -8  111.45    8.50   0-0.45118 0.56965-0.17890 0.58910-0.89807 0.59756
   2   7 -10   33.92    7.56   0-0.45132 0.56495-0.17928 0.65822-0.89792 0.52029
   2   8 -12    6.33    7.69   0-0.44635 0.55490-0.16585 0.71286-0.90299 0.44961
   2   9 -15  -28.16   10.61   0-0.44353 0.54379-0.15834 0.77527-0.90573 0.33906
   3 -11 -10    4.74    9.04   0-0.43980 0.62867-0.14851-0.59287-0.90921 0.55213
   3 -10  -8   -0.96    9.70   0-0.44426 0.63836-0.16027-0.51135-0.90503 0.62289
   3  -6  -4   79.20    8.68   0-0.45034 0.65121-0.17660-0.23000-0.89895 0.76616
   3   1  -4  406.80   16.01   0-0.44331 0.64177-0.15776 0.22828-0.90594 0.76697
   3   5  -8    9.65    7.90   0-0.44792 0.63669-0.17007 0.51141-0.90142 0.60683
   3   6 -10   17.16    7.67   0-0.45160 0.63524-0.18005 0.59001-0.89762 0.52628
   3   7 -12    7.17    7.81   0-0.44892 0.62750-0.17276 0.65146-0.90041 0.45232
   3   8 -16    3.31    7.53   0-0.45342 0.62116-0.18503 0.73391-0.89568 0.29643
   3   8 -15    8.22    7.71   0-0.44835 0.61933-0.17123 0.71894-0.90099 0.33823
   3   8 -14   -5.60    8.82   0-0.44244 0.61439-0.15545 0.70186-0.90676 0.38394
   4  -4  -5   -0.58   11.06   0-0.44142 0.71102-0.15276-0.11631-0.90772 0.73843
   4   4  -9    0.91    7.59   0-0.45356 0.70969-0.18541 0.45938-0.89553 0.56891
   4   5 -10  106.26    8.45   0-0.44563 0.69943-0.16392 0.50737-0.90370 0.53653
   4   6 -12   82.61    8.48   0-0.44635 0.69552-0.16585 0.57739-0.90299 0.45879
   4   7 -15   10.40    7.43   0-0.44864 0.68981-0.17199 0.65170-0.90070 0.34323
   4   7 -14   -6.52    9.32   0-0.44244 0.68425-0.15545 0.63399-0.90676 0.38903
   5  -6  -8   -0.94   12.61   0-0.44208 0.77582-0.15451-0.25176-0.90710 0.63042
   5  -1  -7   -1.44    7.66   0-0.45217 0.78490-0.18158 0.11632-0.89703 0.65424
   5   1  -8    0.89    7.45   0-0.45132 0.78072-0.17928 0.24970-0.89792 0.61577
   5   3 -10   -4.57    7.22   0-0.45203 0.77566-0.18120 0.38783-0.89718 0.53781
   5   4 -11   87.69    8.49   0-0.44621 0.76795-0.16546 0.44142-0.90313 0.50234
   5   5 -13   21.62    7.56   0-0.44792 0.76462-0.17007 0.51338-0.90142 0.42563
   5   6 -16   11.76    7.91   0-0.45048 0.75934-0.17698 0.58903-0.89880 0.30870
   5   6 -15   19.01    9.57   0-0.44315 0.75635-0.15733 0.57132-0.90609 0.35199
   6  -3  -9   -1.19   13.16   0-0.43709 0.83542-0.14144-0.05775-0.91164 0.59871
   6  -2  -9    1.22   10.05   0-0.44262 0.83986-0.15592 0.02276-0.90659 0.59320
   6   0 -10    6.28    8.01   0-0.45342 0.84859-0.18503 0.18763-0.89568 0.54284
   6   2 -11   -3.09    9.64   0-0.44222 0.83212-0.15488 0.29408-0.90697 0.51519
   6   3 -13   -0.78    7.44   0-0.45104 0.83720-0.17852 0.38671-0.89821 0.42961
   6   4 -15   -4.07    7.01   0-0.45175 0.83268-0.18043 0.45737-0.89747 0.35234
   6   4 -14    5.68    9.91   0-0.44302 0.82781-0.15700 0.43329-0.90621 0.39738
   6   5 -18   -1.21    7.17   0-0.45203 0.82509-0.18120 0.52732-0.89718 0.23761
   6   5 -17   -6.31    7.43   0-0.44707 0.82272-0.16777 0.51343-0.90228 0.28059
   6   5 -16  -15.12    9.08   0-0.44208 0.81831-0.15449 0.49849-0.90711 0.32399
   7  -3 -12    4.36   11.32   0-0.44258 0.90254-0.15583-0.04400-0.90663 0.48477
   7  -2 -12    3.03   11.46   0-0.44289 0.90319-0.15663 0.02449-0.90634 0.48350
   7   0 -13   -3.56    8.04   0-0.44764 0.90489-0.16931 0.17461-0.90171 0.43987
   7   1 -14   -1.08    8.05   0-0.44935 0.90361-0.17391 0.24734-0.89997 0.39948
   7   2 -16    1.57    6.92   0-0.45440 0.90429-0.18771 0.33016-0.89462 0.31745
   7   2 -15    2.70    7.13   0-0.44621 0.89839-0.16546 0.30545-0.90313 0.36330
   7   3 -18   -4.93    8.29   0-0.45300 0.89677-0.18388 0.39475-0.89613 0.24251
   7   3 -17    2.91    7.85   0-0.44735 0.89328-0.16854 0.37873-0.90199 0.28632
   8  -3 -17   -2.37    7.31   0-0.45398 0.97361-0.18656-0.00901-0.89507 0.28858
   8  -3 -16   -2.01   11.93   0-0.43704 0.95793-0.14131-0.05420-0.91168 0.34252
   8  -2 -17   -0.91    8.92   0-0.45328 0.97148-0.18465 0.05682-0.89583 0.28859
   8  -2 -16    2.88   10.04   0-0.44113 0.95977-0.15200 0.02168-0.90799 0.33866
   8  -1 -18    6.35    5.93   0-0.45440 0.97377-0.18771 0.12543-0.89462 0.24576
   8  -1 -17   -3.84    8.95   0-0.44750 0.96531-0.16892 0.10872-0.90185 0.29380
   8   0 -18   -1.04    8.98   0-0.44849 0.96309-0.17161 0.17955-0.90084 0.25413
 -12   1   0   -0.98    8.72   0-0.43108-0.40548-0.12733 0.19612-0.91600 0.86413
 -11  -5   1    5.17    8.27   0-0.43710-0.32635-0.14280-0.19295-0.91086 0.90578
 -11  -4   1    7.20    9.81   0-0.43029-0.33350-0.12531-0.14297-0.91665 0.91126
 -11   0   1   -2.38    8.18   0-0.42902-0.33681-0.12210 0.12251-0.91767 0.90976
 -10  -6   1    4.44    7.07   0-0.43456-0.25910-0.13623-0.26774-0.91308 0.91347
 -10  -4   2    8.39    7.29   0-0.43992-0.25172-0.15014-0.11867-0.90832 0.94462
 -10  -3   2    2.31    7.06   0-0.43546-0.25645-0.13855-0.06251-0.91230 0.94770
 -10  -2   2    2.21    7.52   0-0.43396-0.25844-0.13469 0.00133-0.91359 0.94832
 -10  -1   2    0.07    7.18   0-0.43636-0.25498-0.14087 0.07281-0.91152 0.94587
  -9  -8   0   -9.34    8.43   0-0.43154-0.18957-0.12850-0.41142-0.91562 0.88311
  -9  -7   1    5.52    7.34   0-0.43710-0.18646-0.14280-0.32922-0.91086 0.91640
  -9  -5   2   12.43    7.16   0-0.43695-0.18469-0.14242-0.19446-0.91099 0.95254
  -9  -4   2    3.75    8.63   0-0.43062-0.19413-0.12617-0.14426-0.91637 0.95828
  -9   6  -2   -3.44    9.86   0-0.43252-0.20269-0.13101 0.53962-0.91480 0.79677
  -8  -7   1    0.48   10.35   0-0.43123-0.12253-0.12772-0.34456-0.91587 0.92566
  -8  -6   2   -2.61    6.86   0-0.44006-0.10907-0.15052-0.25661-0.90819 0.95497
  -8  -5   2  115.53   10.86   0-0.43061-0.11831-0.12613-0.21133-0.91638 0.96371
  -8   7  -3   -1.08    6.76   0-0.43695-0.13093-0.14242 0.61845-0.91099 0.75780
  -7 -10  -1   -3.71    7.16   0-0.43888-0.04596-0.14744-0.52916-0.90926 0.84949
  -7  -9   0    6.81    6.98   0-0.43859-0.04717-0.14667-0.46091-0.90953 0.88740
  -7  -6   2   12.71    6.77   0-0.43695-0.04513-0.14242-0.26308-0.91099 0.96240
  -7  -3   3    2.59    6.47   0-0.44065-0.03984-0.15207-0.05049-0.90764 0.99418
  -7  -2   3   -1.45    6.73   0-0.43933-0.03936-0.14859 0.01167-0.90886 0.99465
  -7   8  -4    5.96    8.99   0-0.42820-0.07077-0.12003 0.66510-0.91832 0.72932
  -7   9  -6   -5.72   10.16   0-0.43116-0.07527-0.12753 0.74110-0.91593 0.65207
  -6 -10  -1    2.02    7.26   0-0.43844 0.02339-0.14628-0.53035-0.90967 0.85410
  -6  -9   0    0.92    7.02   0-0.43814 0.02517-0.14551-0.46379-0.90993 0.89141
  -6  -6   2  111.11    7.79   0-0.43636 0.02576-0.14087-0.26469-0.91152 0.96711
  -6  -3   3    4.65    6.61   0-0.44021 0.02959-0.15091-0.05190-0.90805 0.99874
  -6  -2   3   -2.72    7.29   0-0.43873 0.02999-0.14705 0.00999-0.90940 0.99925
  -6   8  -4    1.32    9.90   0-0.43062 0.00072-0.12617 0.67126-0.91637 0.73119
  -6   9  -6   -1.43    7.56   0-0.43366-0.00285-0.13391 0.74683-0.91385 0.65395
  -5 -11  -3   -0.60    8.61   0-0.42986 0.07961-0.12424-0.62132-0.91699 0.79109
  -5 -10  -1    8.95    7.17   0-0.44036 0.09200-0.15129-0.52434-0.90792 0.85746
  -5  -9   0   19.20    7.24   0-0.44036 0.09407-0.15129-0.45706-0.90792 0.89454
  -5  -7   1   15.85    9.45   0-0.42980 0.08463-0.12409-0.35068-0.91704 0.94065
  -5  -6   2   41.93    7.60   0-0.43933 0.09855-0.14859-0.25692-0.90886 0.96895
  -5   9  -6    4.85   10.32   0-0.43184 0.06641-0.12927 0.74372-0.91537 0.65808
  -5  10  -8    4.86    9.37   0-0.42894 0.05925-0.12191 0.80374-0.91773 0.58381
  -4 -11  -3    1.85    6.97   0-0.43275 0.15274-0.13159-0.61168-0.91461 0.79239
  -4  -7   1    4.10    7.18   0-0.43456 0.15980-0.13623-0.33744-0.91308 0.94021
  -4  -5   2  358.22    9.93   0-0.43426 0.16173-0.13546-0.20243-0.91333 0.97659
  -4   1   2   -0.23   13.11   0-0.43267 0.16006-0.13140 0.19723-0.91468 0.97243
  -4   3   1   41.38   13.08   0-0.42986 0.15405-0.12424 0.32499-0.91699 0.93628
  -4   7  -3    5.92    7.20   0-0.43426 0.14623-0.13546 0.61242-0.91333 0.77595
  -4  10  -9    3.35    7.66   0-0.43725 0.13430-0.14319 0.82617-0.91073 0.54286
  -3 -12  -5    0.18    9.40   0-0.43146 0.21703-0.12830-0.67932-0.91568 0.72250
  -3 -11  -3    0.76    7.38   0-0.43918 0.22883-0.14821-0.59525-0.90900 0.79113
  -3 -10  -2    2.06    7.63   0-0.43531 0.22704-0.13817-0.53801-0.91243 0.83161
  -3  -9  -1   50.33    7.78   0-0.43426 0.22671-0.13546-0.47284-0.91333 0.87027
  -3  -8   0    6.92    6.95   0-0.43665 0.22963-0.14165-0.39936-0.91125 0.90543
  -3  -6   1   13.75   10.07   0-0.43010 0.22425-0.12485-0.28324-0.91679 0.94827
  -3  -4   2   32.40    8.04   0-0.43651 0.23284-0.14126-0.12907-0.91139 0.97805
  -3   5  -1  180.46   12.86   0-0.43132 0.21822-0.12793 0.46737-0.91580 0.86187
  -3   6  -2   -0.31   10.15   0-0.43017 0.21465-0.12501 0.53135-0.91674 0.82362
  -3   8  -5   37.80    7.79   0-0.43426 0.21157-0.13546 0.67944-0.91333 0.70454
  -3   9  -7    0.85    7.19   0-0.43561 0.20639-0.13894 0.75163-0.91217 0.62716
  -3  10  -9  -10.29    9.30   0-0.43062 0.19622-0.12617 0.80803-0.91637 0.55483
  -2 -11  -4   -3.35    7.40   0-0.43335 0.29029-0.13314-0.60982-0.91410 0.76259
  -2  -7   0   90.13   10.21   0-0.43214 0.29477-0.13004-0.34321-0.91512 0.91296
  -2  -5   1   99.94   11.11   0-0.43055 0.29492-0.12598-0.21185-0.91643 0.95095
  -2   7  -4    2.28    6.77   0-0.43335 0.28249-0.13314 0.60996-0.91410 0.74738
  -2   8  -6   15.32    7.26   0-0.44036 0.28514-0.15129 0.69610-0.90792 0.66483
  -2   9  -8   42.85    7.31   0-0.43918 0.28034-0.14821 0.76085-0.90900 0.58995
  -2  10 -10   37.95    8.50   0-0.43305 0.26809-0.13237 0.81520-0.91436 0.51654
  -1 -12  -6    3.23    7.11   0-0.43859 0.36054-0.14667-0.66265-0.90953 0.68720
  -1 -11  -5   14.93    9.96   0-0.43035 0.35214-0.12547-0.61764-0.91660 0.73257
  -1  -9  -2   32.72    7.64   0-0.43962 0.36817-0.14937-0.45808-0.90859 0.83675
  -1  -6   0   10.85    7.24   0-0.43396 0.36589-0.13469-0.27162-0.91359 0.91471
  -1  -3   1 1446.10   21.18   0-0.43501 0.36709-0.13739-0.06470-0.91269 0.94949
  -1  -2   1  255.73   19.38   0-0.43062 0.36231-0.12616-0.00821-0.91637 0.95246
  -1  -1   1 3066.60   40.64   0-0.43606 0.36713-0.14010 0.07351-0.91178 0.94683
  -1   2   0   66.70   14.44   0-0.43531 0.36416-0.13817 0.27417-0.91243 0.90660
  -1   7  -5  183.27    8.99   0-0.43755 0.35417-0.14396 0.62041-0.91046 0.71076
  -1   9  -9    6.24    6.97   0-0.43918 0.34576-0.14821 0.76260-0.90900 0.55497
  -1  10 -12   -0.24    7.27   0-0.44050 0.33845-0.15168 0.83469-0.90778 0.44085
  -1  10 -11    9.83    9.19   0-0.43184 0.33350-0.12927 0.81264-0.91537 0.48456
   0 -12  -7   27.43    7.87   0-0.43962 0.42741-0.14937-0.65994-0.90859 0.65318
   0 -11  -6   15.99    9.30   0-0.43016 0.41942-0.12499-0.61784-0.91675 0.69899
   0 -10  -4    2.23    6.82   0-0.44006 0.43591-0.15052-0.52478-0.90819 0.76441
   0  -9  -3   24.31    7.15   0-0.43755 0.43324-0.14396-0.46430-0.91046 0.80450
   0  -8  -2   48.71    7.56   0-0.43918 0.43705-0.14821-0.39302-0.90900 0.84009
   0  -4   0  263.01   12.08   0-0.43426 0.43421-0.13546-0.13423-0.91333 0.91755
   0   7  -6   65.46    8.18   0-0.43695 0.42066-0.14242 0.61876-0.91099 0.67830
   0   8  -8   49.63    7.37   0-0.43962 0.41887-0.14937 0.69466-0.90859 0.59827
   0   9 -10   -3.95    7.81   0-0.43606 0.40907-0.14010 0.75402-0.91178 0.52574
   0  10 -13   -2.38    8.14   0-0.43591 0.40131-0.13971 0.82324-0.91191 0.41128
   1 -11  -7   -1.08    7.21   0-0.43335 0.49185-0.13314-0.60813-0.91410 0.66174
   1  -9  -4    7.94    7.09   0-0.43962 0.50256-0.14937-0.45893-0.90859 0.76916
   1  -4  -1  209.05   14.57   0-0.43093 0.49795-0.12695-0.14272-0.91612 0.88632
   1   7  -7    6.09    7.33   0-0.43275 0.48412-0.13159 0.60895-0.91461 0.64693
   1   8  -9   10.73    7.58   0-0.43426 0.48067-0.13546 0.68156-0.91333 0.56884
   1   9 -12    7.17    7.25   0-0.43918 0.47814-0.14821 0.76321-0.90900 0.44969
   1   9 -11   11.87   10.50   0-0.43062 0.47165-0.12617 0.73995-0.91637 0.49496
   2 -10  -7    7.90    9.84   0-0.43117 0.55673-0.12755-0.54651-0.91593 0.66744
   2  -6  -3    0.70    9.73   0-0.43062 0.56322-0.12617-0.27653-0.91637 0.81595
   2   2  -3   17.23   12.27   0-0.43516 0.56606-0.13778 0.27416-0.91256 0.80617
   2   6  -7   64.80    8.30   0-0.43456 0.55522-0.13623 0.54637-0.91308 0.65075
   2   7  -9   25.22    7.32   0-0.43903 0.55529-0.14782 0.62593-0.90913 0.56979
   2   8 -11   16.91    7.30   0-0.43680 0.54821-0.14203 0.68865-0.91112 0.49500
   2   9 -14    2.59    8.24   0-0.43710 0.54020-0.14280 0.75888-0.91086 0.38155
   2   9 -13   22.13   10.44   0-0.43037 0.53652-0.12553 0.74024-0.91658 0.42361
   3  -9  -7   17.11    7.82   0-0.43755 0.63279-0.14396-0.46401-0.91046 0.66527
   3  -8  -6    7.19    6.67   0-0.43456 0.63206-0.13623-0.40396-0.91308 0.70543
   3  -7  -5   -1.65    7.47   0-0.43740 0.63850-0.14358-0.32823-0.91060 0.73925
   3   3  -5   17.24   11.83   0-0.43062 0.62646-0.12617 0.33088-0.91637 0.73718
   3   4  -6   10.70    7.70   0-0.43275 0.62679-0.13159 0.40453-0.91461 0.69619
   3   5  -7   11.06   10.43   0-0.43018 0.62102-0.12504 0.46560-0.91673 0.65936
   3   6  -9   24.49    7.75   0-0.43814 0.62442-0.14551 0.55573-0.90993 0.57620
   3   7 -11   33.90    7.58   0-0.43873 0.62051-0.14705 0.62632-0.90940 0.49744
   3   8 -13   13.65    6.97   0-0.43396 0.61054-0.13469 0.68214-0.91359 0.42585
   4 -10 -11    5.52    9.74   0-0.43027 0.68769-0.12527-0.55080-0.91666 0.52445
   4  -9  -9   -1.45    7.48   0-0.43636 0.69831-0.14087-0.46433-0.91152 0.59479
   4  -8  -8   12.14   10.31   0-0.42975 0.69271-0.12395-0.41584-0.91708 0.63782
   4  -7  -7    2.00    9.23   0-0.42741 0.69194-0.11803-0.35388-0.91895 0.67649
   4  -6  -6   19.28    7.92   0-0.43606 0.70311-0.14010-0.26767-0.91178 0.70509
   4   0  -5    2.93   12.25   0-0.43078 0.69807-0.12656 0.12771-0.91625 0.74367
   4   2  -6   26.12   12.33   0-0.43184 0.69553-0.12927 0.26872-0.91537 0.70295
   4   3  -7   38.46    7.80   0-0.43755 0.69826-0.14396 0.35108-0.91046 0.65916
   4   4  -8  104.73    8.55   0-0.43636 0.69507-0.14087 0.41574-0.91152 0.62051
   4   5  -9   38.71   10.56   0-0.43092 0.68696-0.12692 0.46980-0.91613 0.58687
   4   6 -11   25.21    7.85   0-0.43561 0.68701-0.13894 0.54957-0.91217 0.50608
   4   7 -13   -6.44    7.30   0-0.43335 0.67906-0.13314 0.61276-0.91410 0.43279
   4   8 -16   -6.70    7.92   0-0.43290 0.67099-0.13198 0.68093-0.91448 0.31859
   5  -8 -10    0.70    9.29   0-0.43591 0.76349-0.13971-0.39912-0.91191 0.56100
   5  -7  -9   -3.40   13.72   0-0.43078 0.76139-0.12656-0.34299-0.91625 0.60195
   5   0  -7    1.70    8.33   0-0.43561 0.76801-0.13894 0.14074-0.91217 0.66798
   5   2  -8    0.99    9.71   0-0.43184 0.76125-0.12927 0.26705-0.91537 0.63143
   5   3  -9  163.74    8.81   0-0.43426 0.76098-0.13546 0.34332-0.91333 0.58954
   5   4 -10   51.52   10.04   0-0.43143 0.75565-0.12823 0.40383-0.91571 0.55321
   5   5 -12   -1.42    6.93   0-0.43755 0.75583-0.14396 0.48732-0.91046 0.47288
   5   6 -14    2.95    7.31   0-0.43636 0.74944-0.14087 0.55296-0.91152 0.39734
   5   7 -17   -4.05    8.07   0-0.43576 0.74151-0.13933 0.62098-0.91204 0.28327
   5   7 -16  -10.36   10.72   0-0.43032 0.73828-0.12540 0.60640-0.91662 0.32573
   6  -8 -13   -1.97   11.10   0-0.43123 0.82235-0.12772-0.40742-0.91587 0.45536
   6  -1  -9   -1.67    9.81   0-0.43267 0.83196-0.13140 0.06741-0.91468 0.59920
   6   1 -10   -0.42    7.25   0-0.43799 0.83236-0.14512 0.21686-0.91006 0.55568
   6   3 -12    1.25    7.63   0-0.43873 0.82732-0.14705 0.35502-0.90940 0.47766
   6   4 -13  -12.56    7.46   0-0.43290 0.81888-0.13198 0.40820-0.91448 0.44406
   6   5 -15   -2.96    7.06   0-0.43351 0.81420-0.13353 0.47842-0.91398 0.36696
   7  -1 -12    0.05    8.21   0-0.43695 0.89710-0.14242 0.07999-0.91099 0.48679
   7   0 -12    0.27    9.32   0-0.42948 0.88769-0.12327 0.12855-0.91730 0.49279
   7   1 -13    5.21    8.17   0-0.43516 0.89260-0.13778 0.20957-0.91256 0.44832
   7   2 -14   -1.25    7.31   0-0.43486 0.88911-0.13701 0.27857-0.91282 0.41038
   7   3 -16    4.37    7.09   0-0.43947 0.88949-0.14898 0.35779-0.90873 0.32879
   7   3 -15   10.42   10.59   0-0.43088 0.88291-0.12683 0.33512-0.91616 0.37415
   7   4 -18    4.03    7.59   0-0.43695 0.88207-0.14242 0.41999-0.91099 0.25421
   7   4 -17   11.75   10.63   0-0.43108 0.87833-0.12733 0.40432-0.91600 0.29722
   8  -4 -16    0.32   13.11   0-0.41690 0.93947-0.09200-0.17356-0.92664 0.35675
   8  -1 -16   -1.06   10.33   0-0.43275 0.95551-0.13159 0.07154-0.91461 0.34207
   8   0 -17   -2.35    8.42   0-0.43933 0.95673-0.14859 0.15656-0.90886 0.29871
   8   0 -16    4.18    9.65   0-0.42943 0.94796-0.12314 0.12840-0.91734 0.34532
   8   1 -18    0.44    7.72   0-0.43770 0.95236-0.14435 0.22051-0.91033 0.26144
   8   1 -17   -5.10   10.61   0-0.43001 0.94619-0.12462 0.20026-0.91687 0.30584
 -12  -3   0   -4.84    9.82   0-0.41817-0.41594-0.09596-0.10634-0.92551 0.87735
 -12  -2   0    1.00    9.62   0-0.41626-0.42120-0.09129-0.04367-0.92683 0.87912
 -12   0   0   -0.36   10.71   0-0.41849-0.41838-0.09673 0.10038-0.92529 0.87454
 -11  -5   0   -2.14    9.56   0-0.41706-0.34812-0.09323-0.24567-0.92628 0.88456
 -11  -3   1    0.41    7.55   0-0.42415-0.33808-0.11072-0.09225-0.92118 0.91532
 -11  -2   1   -3.07    9.75   0-0.41936-0.34109-0.09887-0.03613-0.92467 0.91726
 -11  -1   1    4.99    9.20   0-0.42020-0.34284-0.10094 0.03601-0.92408 0.91572
 -10  -7   0   -3.50    7.13   0-0.42725-0.26576-0.11848-0.35525-0.91879 0.88241
 -10  -5   1    3.93    7.26   0-0.42446-0.26919-0.11150-0.22484-0.92094 0.92093
  -9  -7   0   -4.36   10.10   0-0.41801-0.20464-0.09557-0.37812-0.92562 0.89312
  -9  -6   1   -1.38    6.78   0-0.42508-0.19604-0.11305-0.29355-0.92047 0.92539
  -9  -3   2    8.14    7.53   0-0.42274-0.19929-0.10723-0.09432-0.92222 0.96255
  -9  -2   2   -0.53    9.43   0-0.41785-0.20343-0.09518-0.03864-0.92573 0.96457
  -9  -1   2   -3.50    9.70   0-0.41817-0.20258-0.09596 0.02740-0.92551 0.96440
  -9   0   2   -0.54    7.36   0-0.42493-0.19673-0.11266 0.11196-0.92059 0.95893
  -9   7  -3    0.48    9.91   0-0.41833-0.21898-0.09634 0.57263-0.92540 0.76868
  -8  -9  -1   -0.32    7.23   0-0.42539-0.12937-0.11383-0.49499-0.92023 0.85564
  -8  -8   0    1.06    7.46   0-0.42648-0.12632-0.11654-0.42508-0.91939 0.89202
  -8  -6   1    6.57    9.20   0-0.41817-0.13587-0.09596-0.30887-0.92551 0.93501
  -8  -4   2   13.63    7.17   0-0.42054-0.13145-0.10179-0.16778-0.92383 0.96920
  -8   1   2    2.48    8.70   0-0.41854-0.13233-0.09687 0.16549-0.92525 0.96541
  -8   3   1   -0.76   14.29   0-0.37926-0.17276-0.00545 0.20912-0.94640 0.94771
  -8   8  -4   -4.29   10.61   0-0.41825-0.15217-0.09615 0.64070-0.92545 0.73436
  -7 -10  -2   -3.86    7.25   0-0.42399-0.06298-0.11033-0.56575-0.92129 0.82371
  -7  -9  -1   -6.46    6.74   0-0.42196-0.06299-0.10528-0.50356-0.92280 0.86236
  -7  -8   0    8.35    7.47   0-0.42290-0.06297-0.10761-0.43225-0.92211 0.89932
  -7  -7   1   26.41    7.59   0-0.42756-0.05533-0.11926-0.35296-0.91855 0.93321
  -7  -5   2   61.87    7.73   0-0.42570-0.05415-0.11460-0.22302-0.91999 0.97091
  -6 -11  -3    6.50    7.24   0-0.42741 0.00510-0.11887-0.62301-0.91867 0.78884
  -6 -10  -2   -5.54    6.93   0-0.42306 0.00577-0.10800-0.56830-0.92199 0.82872
  -6  -9  -1   14.53    7.38   0-0.42086 0.00263-0.10256-0.50491-0.92360 0.86802
  -6  -8   0  153.60    8.88   0-0.42196 0.00839-0.10528-0.43539-0.92280 0.90447
  -6  -7   1    3.54    6.93   0-0.42663 0.01251-0.11693-0.35601-0.91927 0.93785
  -6  -5   2    2.51    7.19   0-0.42446 0.01215-0.11150-0.22640-0.92094 0.97568
  -6   6  -1   28.81    9.68   0-0.41530-0.00507-0.08895 0.49576-0.92747 0.86025
  -5 -10  -2    4.64    7.00   0-0.42431 0.07373-0.11111-0.56397-0.92106 0.83267
  -5  -9  -1   17.76    7.44   0-0.42243 0.07386-0.10645-0.50152-0.92246 0.87128
  -5  -8   0    2.05    6.80   0-0.42353 0.08001-0.10917-0.43262-0.92164 0.90673
  -5  -5   2   46.84    8.19   0-0.42694 0.08556-0.11770-0.21932-0.91903 0.97804
  -5   8  -4    4.27    7.86   0-0.42725 0.06738-0.11848 0.66406-0.91879 0.73870
  -4 -11  -4   -4.31    9.73   0-0.41793 0.13584-0.09537-0.64724-0.92568 0.76547
  -4 -10  -2   -8.29    7.45   0-0.42818 0.15032-0.12081-0.55519-0.91806 0.83294
  -4  -9  -1   46.76    7.28   0-0.42663 0.14978-0.11693-0.49105-0.91927 0.87210
  -4  -8   0   -1.66    6.97   0-0.42818 0.15437-0.12081-0.42079-0.91806 0.90714
  -4  -6   1   13.97   10.34   0-0.41791 0.14350-0.09533-0.30946-0.92569 0.95099
  -4  -4   2  872.95   13.74   0-0.42290 0.14977-0.10761-0.16245-0.92211 0.98463
  -4   8  -4   48.40    8.06   0-0.42133 0.13172-0.10373 0.64671-0.92326 0.74923
  -4   9  -6   -1.51    6.71   0-0.42663 0.13054-0.11693 0.72947-0.91927 0.66832
  -4  10  -8    0.62    7.18   0-0.42415 0.12277-0.11072 0.79214-0.92118 0.59355
  -3 -11  -4    1.10    7.38   0-0.42415 0.21153-0.11072-0.63223-0.92118 0.76538
  -3 -10  -3   22.07    9.85   0-0.41804 0.20467-0.09563-0.57943-0.92560 0.80767
  -3  -7   0    6.64    9.77   0-0.41833 0.21120-0.09634-0.37630-0.92540 0.91825
  -3  -3   2    1.88    8.99   0-0.42818 0.22446-0.12081-0.08251-0.91806 0.98383
  -3  -2   2   17.70   10.31   0-0.42274 0.21900-0.10723-0.02768-0.92222 0.98710
  -3  -1   2   94.62   11.08   0-0.42368 0.21974-0.10956 0.04309-0.92153 0.98547
  -3   4   0    5.86    8.80   0-0.42399 0.21382-0.11033 0.38226-0.92129 0.90504
  -3   7  -3   -1.26    6.41   0-0.42212 0.20392-0.10567 0.58061-0.92269 0.79118
  -3   9  -6   -2.30    9.66   0-0.41785 0.19251-0.09518 0.71006-0.92573 0.67794
  -3  10  -8   -3.39    9.53   0-0.41769 0.18615-0.09479 0.77568-0.92584 0.60246
  -2 -12  -6   -6.87    7.54   0-0.42725 0.27976-0.11848-0.69091-0.91879 0.69212
  -2 -11  -5    4.74   10.36   0-0.41795 0.26995-0.09541-0.64709-0.92567 0.73712
  -2 -10  -3    5.51    6.90   0-0.42771 0.28397-0.11964-0.55579-0.91843 0.80481
  -2  -9  -2    3.39    6.99   0-0.42508 0.28338-0.11305-0.49501-0.92047 0.84387
  -2  -8  -1   35.34    7.31   0-0.42632 0.28725-0.11615-0.42540-0.91951 0.87988
  -2   8  -5   27.59    7.10   0-0.42133 0.26831-0.10373 0.64809-0.92326 0.71850
  -2   9  -7    2.77    7.09   0-0.42462 0.26577-0.11189 0.72466-0.92082 0.64036
  -2  10  -9  -12.26    7.39   0-0.42133 0.25727-0.10373 0.78543-0.92326 0.56615
  -1 -12  -7   -1.22    7.08   0-0.42524 0.34501-0.11344-0.69560-0.92035 0.66011
  -1 -10  -4    7.80    6.74   0-0.42306 0.34673-0.10800-0.56731-0.92199 0.77470
  -1  -9  -3   14.32    9.85   0-0.41870 0.34434-0.09724-0.51033-0.92514 0.81468
  -1  -8  -2    4.90    9.57   0-0.41791 0.34564-0.09532-0.44460-0.92569 0.85204
  -1  -7  -1    1.01    7.52   0-0.42259 0.35483-0.10684-0.36648-0.92234 0.88516
  -1   5  -2   12.56    8.62   0-0.42243 0.34628-0.10645 0.44697-0.92246 0.83784
  -1   6  -3    7.34    7.52   0-0.42086 0.34269-0.10256 0.51101-0.92360 0.80025
  -1   8  -6  128.71    8.51   0-0.42508 0.33952-0.11305 0.65760-0.92047 0.68222
  -1   9  -8   -2.40    7.01   0-0.42632 0.33486-0.11615 0.72908-0.91951 0.60527
  -1  10 -10    4.66    7.50   0-0.42165 0.32625-0.10451 0.78712-0.92303 0.53037
   0 -10  -5   -2.22    7.16   0-0.42149 0.41492-0.10412-0.57032-0.92315 0.74120
   0  -9  -4    2.90    8.64   0-0.41626 0.40953-0.09129-0.51666-0.92683 0.78288
   0  -7  -2   26.04    9.92   0-0.41761 0.41443-0.09457-0.37874-0.92590 0.85656
   0  -6  -1  116.14    9.02   0-0.42756 0.42629-0.11926-0.28578-0.91855 0.88660
   0  -3   0   -3.19   12.54   0-0.42054 0.42318-0.10179-0.10179-0.92383 0.92570
   0   4  -2    2.37    9.47   0-0.42415 0.41852-0.11072 0.38284-0.92118 0.84177
   0   5  -3   32.97    8.12   0-0.42756 0.41804-0.11926 0.45891-0.91855 0.80108
   0   6  -4  197.61    9.04   0-0.42399 0.41244-0.11033 0.51869-0.92129 0.76480
   0   7  -5  189.17   11.35   0-0.41757 0.40350-0.09449 0.57081-0.92593 0.72972
   0   8  -7   56.53    7.47   0-0.42446 0.40646-0.11150 0.65625-0.92094 0.64919
   0   9  -9   27.64    7.42   0-0.42431 0.40163-0.11111 0.72518-0.92106 0.57135
   0  10 -12    6.62    7.44   0-0.42771 0.39745-0.11964 0.80313-0.91843 0.45412
   0  10 -11    5.19    9.99   0-0.41816 0.39048-0.09593 0.78000-0.92552 0.49943
   1 -11  -8    2.04   10.23   0-0.41738 0.47158-0.09401-0.64755-0.92606 0.63616
   1 -10  -6    7.86    7.34   0-0.42399 0.48241-0.11033-0.56442-0.92129 0.70651
   1  -9  -5   38.03   10.49   0-0.41738 0.47687-0.09401-0.51410-0.92606 0.74830
   1  -7  -3   98.83   10.38   0-0.41658 0.48004-0.09207-0.38148-0.92661 0.82325
   1  -6  -2   29.09    7.92   0-0.42663 0.49323-0.11693-0.28911-0.91927 0.85309
   1   4  -3   24.84    9.04   0-0.42399 0.48432-0.11033 0.38320-0.92129 0.80859
   1   5  -4   -6.72    7.36   0-0.42570 0.48468-0.11460 0.45395-0.91999 0.76873
   1   6  -5   98.27    8.13   0-0.42180 0.47771-0.10490 0.51390-0.92292 0.73228
   1   8  -8   -1.31    7.37   0-0.42054 0.46894-0.10179 0.64667-0.92383 0.61871
   1   9 -10    1.38    9.38   0-0.41857 0.46229-0.09693 0.71270-0.92523 0.54314
   1  10 -13   -5.36    7.71   0-0.42149 0.45731-0.10412 0.78742-0.92315 0.42685
   2 -11  -9    4.63    7.34   0-0.42539 0.54684-0.11383-0.62749-0.92023 0.59669
   2  -9  -6   12.52    7.05   0-0.42415 0.55204-0.11072-0.49665-0.92118 0.70980
   2  -8  -5   20.91    7.66   0-0.42070 0.55066-0.10218-0.43851-0.92372 0.74913
   2  -7  -4   55.29    7.57   0-0.42259 0.55447-0.10684-0.36662-0.92234 0.78495
   2  -3  -2   92.23   12.82   0-0.42196 0.55825-0.10528-0.09872-0.92280 0.85753
   2   0  -2  129.59   20.52   0-0.41801 0.55189-0.09557 0.09721-0.92562 0.85861
   2   4  -4 1606.94   20.02   0-0.41784 0.54535-0.09514 0.36831-0.92574 0.77886
   2   5  -5   60.98   10.40   0-0.41881 0.54421-0.09751 0.43843-0.92507 0.74004
   2   7  -8    6.96    7.72   0-0.42462 0.54380-0.11189 0.58954-0.92082 0.61951
   2   8 -10    8.21    6.66   0-0.42570 0.53996-0.11460 0.66090-0.91999 0.54187
   2   9 -12   27.31    7.47   0-0.42118 0.53133-0.10334 0.71788-0.92337 0.46872
   3 -10  -9    9.70    7.76   0-0.42586 0.61688-0.11499-0.55909-0.91987 0.59978
   3  -5  -4   35.39    8.45   0-0.42384 0.62480-0.10994-0.22885-0.92141 0.78656
   3   2  -4   10.61   13.49   0-0.41785 0.61601-0.09518 0.23139-0.92573 0.78521
   3   6  -8    3.98    7.55   0-0.42259 0.61192-0.10684 0.51666-0.92234 0.62618
   3   7 -10    3.84    7.51   0-0.42710 0.61135-0.11809 0.59638-0.91891 0.54592
   3   8 -12   -2.31    7.12   0-0.42493 0.60331-0.11266 0.65958-0.92059 0.47215
   3   9 -15  -10.42    7.70   0-0.42493 0.59595-0.11266 0.72913-0.92059 0.35758
   3   9 -14    7.24   10.38   0-0.41817 0.59265-0.09595 0.71169-0.92551 0.39892
   4   6 -10    5.46    7.20   0-0.42259 0.67695-0.10684 0.51723-0.92234 0.55449
   4   7 -12    7.38    7.88   0-0.42368 0.67305-0.10956 0.58856-0.92153 0.47686
   4   8 -15    1.63    7.70   0-0.42648 0.66741-0.11654 0.66495-0.91939 0.36137
   4   8 -14   -1.14    8.99   0-0.41857 0.66288-0.09693 0.64652-0.92523 0.40438
   5  -9 -12    2.43   10.07   0-0.42259 0.74575-0.10684-0.49848-0.92234 0.49595
   5   1  -7   13.12   10.45   0-0.41914 0.75124-0.09832 0.16820-0.92483 0.67963
   5   5 -11    0.46    7.06   0-0.42508 0.74621-0.11305 0.45613-0.92047 0.52063
   5   6 -13    1.07    7.71   0-0.42694 0.74313-0.11770 0.52969-0.91903 0.44260
   5   6 -12   -7.54    8.89   0-0.41730 0.73460-0.09382 0.50403-0.92612 0.48826
   5   7 -15  -12.49    7.26   0-0.42321 0.73420-0.10839 0.58906-0.92188 0.36884
   6  -7 -12    1.01   11.95   0-0.41339 0.80585-0.08434-0.38581-0.92874 0.50473
   6  -5 -10   -0.04   15.75   0-0.41160 0.81014-0.08002-0.25679-0.92989 0.57987
   6   0  -9   -3.68    7.93   0-0.42446 0.82155-0.11150 0.11526-0.92094 0.60494
   6   2 -10  152.80    8.78   0-0.42196 0.81679-0.10528 0.24615-0.92280 0.56565
   6   3 -11   -0.82    7.44   0-0.42353 0.81495-0.10917 0.31688-0.92164 0.52756
   6   4 -12   14.12    7.56   0-0.42039 0.80996-0.10140 0.37653-0.92394 0.49042
   6   5 -14   16.38    7.47   0-0.42431 0.80902-0.11111 0.45499-0.92106 0.41073
   6   6 -17   12.55    7.16   0-0.42787 0.80555-0.12003 0.53326-0.91831 0.29319
   6   6 -16    4.55    7.55   0-0.42165 0.80158-0.10451 0.51720-0.92303 0.33589
   7  -4 -12    0.50   14.81   0-0.40485 0.86687-0.06395-0.20370-0.93401 0.51078
   7   1 -12    4.80   10.52   0-0.41801 0.87723-0.09557 0.16698-0.92562 0.49899
   7   2 -13    7.53    7.15   0-0.42118 0.87880-0.10334 0.24319-0.92337 0.45789
   7   3 -14   -2.01    8.94   0-0.41881 0.87441-0.09751 0.30761-0.92507 0.42072
   7   4 -16    4.62    7.62   0-0.42321 0.87344-0.10839 0.38527-0.92188 0.34074
   8  -2 -15   -3.11   11.47   0-0.41793 0.94150-0.09537-0.03275-0.92568 0.39258
   8  -1 -15   -1.79   10.80   0-0.41801 0.94115-0.09557 0.03509-0.92562 0.39169
   8   1 -16    6.15   10.79   0-0.41769 0.93919-0.09479 0.16828-0.92584 0.35144
   8   2 -17   -2.82   10.00   0-0.41777 0.93460-0.09498 0.23847-0.92579 0.31363
 -12  -1   0   -3.91    8.48   0-0.41302-0.42218-0.08520 0.01801-0.92837 0.87935
 -12   2  -1   -0.33    9.56   0-0.39771-0.44069-0.04893 0.18562-0.93746 0.84842
 -11  -4   0   16.68    9.00   0-0.40520-0.35899-0.06650-0.20122-0.93325 0.89060
 -11   2   0    1.75    8.79   0-0.40832-0.35887-0.07390 0.21232-0.93137 0.88351
 -10  -7  -1   13.99    7.09   0-0.40881-0.28844-0.07507-0.39621-0.93107 0.85743
 -10  -6   0    6.91    6.81   0-0.41399-0.28127-0.08754-0.31646-0.92773 0.89118
 -10  -4   1   -6.11    7.55   0-0.41431-0.27714-0.08832-0.18300-0.92752 0.92712
 -10  -3   1    3.85    8.91   0-0.40619-0.28750-0.06883-0.13229-0.93266 0.93127
 -10   1   1   -2.53    9.11   0-0.40602-0.28616-0.06844 0.13564-0.93276 0.92819
  -9  -8  -1   -6.75    6.95   0-0.41463-0.20974-0.08910-0.45216-0.92730 0.85817
  -9  -6   0   10.02    9.14   0-0.40338-0.22171-0.06220-0.34193-0.93431 0.90234
  -9  -5   1   12.43    6.98   0-0.41286-0.21070-0.08482-0.25216-0.92848 0.93317
  -9   8  -4   -1.15    8.83   0-0.40247-0.23599-0.06006 0.60296-0.93483 0.73968
  -8  -9  -2    1.65    7.45   0-0.40881-0.14770-0.07507-0.53348-0.93107 0.82890
  -8  -8  -1   -3.20    7.40   0-0.40816-0.14662-0.07351-0.46811-0.93147 0.86673
  -8  -7   0    0.10    6.90   0-0.41044-0.14223-0.07897-0.39513-0.93004 0.90219
  -8  -5   1   -1.73    9.52   0-0.40421-0.14709-0.06415-0.27526-0.93383 0.94287
  -8  -3   2    5.34    7.79   0-0.41189-0.14023-0.08248-0.11969-0.92911 0.97415
  -8  -2   2   10.93    9.60   0-0.40476-0.14663-0.06545-0.06868-0.93351 0.97709
  -8  -1   2   55.49   10.41   0-0.40421-0.14586-0.06415-0.00121-0.93383 0.97881
  -8   0   2   68.02   10.31   0-0.40570-0.14432-0.06766 0.07114-0.93296 0.97569
  -7 -10  -3    2.05    7.54   0-0.40865-0.08016-0.07468-0.60133-0.93117 0.79614
  -7  -9  -2   -4.65    9.17   0-0.40446-0.08204-0.06474-0.54355-0.93369 0.83563
  -7  -8  -1   13.98   10.41   0-0.40421-0.08346-0.06415-0.47608-0.93383 0.87472
  -7  -7   0   -4.58    8.74   0-0.40504-0.07656-0.06610-0.40665-0.93335 0.90917
  -7  -6   1   -1.84    7.32   0-0.41270-0.06846-0.08443-0.32272-0.92858 0.94221
  -7  -4   2   -5.07    6.85   0-0.41447-0.06528-0.08871-0.18353-0.92741 0.97743
  -7  -3   2   15.64    9.53   0-0.40487-0.07612-0.06571-0.13567-0.93345 0.98315
  -7   1   2    1.77    9.86   0-0.40406-0.07923-0.06381 0.13247-0.93392 0.97983
  -7   5   0  -15.17   14.61   0-0.39799-0.09148-0.04958 0.38839-0.93731 0.90501
  -7   6  -1   -2.48    9.62   0-0.40668-0.08638-0.07000 0.47793-0.93237 0.86148
  -7   7  -2    6.09    9.90   0-0.40406-0.09002-0.06380 0.54096-0.93392 0.82265
  -7   9  -5    1.41    7.39   0-0.40832-0.09502-0.07390 0.68613-0.93137 0.70587
  -6 -10  -3    1.68    7.54   0-0.40685-0.01217-0.07039-0.60543-0.93227 0.80127
  -6  -9  -2   10.57    8.91   0-0.40272-0.01710-0.06064-0.54640-0.93469 0.84169
  -6  -7   0   14.86   10.13   0-0.40421-0.01162-0.06415-0.40833-0.93383 0.91555
  -6  -6   1   72.83    7.62   0-0.41108-0.00206-0.08053-0.32370-0.92963 0.94840
  -6  -4   2  436.42   10.36   0-0.41238 0.00087-0.08365-0.18501-0.92879 0.98332
  -6   5   0    2.97    8.73   0-0.40772-0.01249-0.07248 0.41371-0.93174 0.90265
  -6   7  -2   59.28    8.09   0-0.40930-0.01279-0.07624 0.55062-0.93076 0.82537
  -6   9  -5    1.61    7.83   0-0.41189-0.02152-0.08248 0.69447-0.92911 0.70782
  -6  10  -7   -1.42    7.08   0-0.41270-0.02603-0.08443 0.76539-0.92858 0.63067
  -5 -11  -4    0.38    7.18   0-0.41415 0.06278-0.08793-0.65521-0.92762 0.76373
  -5 -10  -3    7.33    6.74   0-0.40766 0.05524-0.07234-0.60254-0.93177 0.80581
  -5  -9  -2    7.52    9.12   0-0.40402 0.05343-0.06371-0.54468-0.93394 0.84563
  -5  -7   0   27.13   10.40   0-0.40501 0.05951-0.06604-0.40651-0.93336 0.91883
  -5  -6   1  209.23    9.36   0-0.41238 0.06820-0.08365-0.32076-0.92879 0.95118
  -5  -4   2    1.00    7.33   0-0.41495 0.07462-0.08988-0.18257-0.92709 0.98536
  -5  -3   2  144.63   12.27   0-0.40421 0.06147-0.06414-0.13701-0.93384 0.99226
  -5   1   2    0.86   10.53   0-0.40163 0.05639-0.05808 0.12652-0.93531 0.99024
  -5   5   0   19.72   10.46   0-0.40421 0.05407-0.06415 0.40287-0.93383 0.90996
  -5   6  -1   39.79    7.83   0-0.41173 0.06096-0.08209 0.48892-0.92921 0.86585
  -5   7  -2    3.87    8.46   0-0.40591 0.05026-0.06817 0.54648-0.93283 0.83032
  -5   9  -5   -3.93    7.50   0-0.41076 0.04711-0.07975 0.69194-0.92984 0.71289
  -5  10  -7   -1.88    7.77   0-0.41222 0.04338-0.08326 0.76402-0.92890 0.63518
  -4 -11  -5   -7.87    9.02   0-0.40355 0.11911-0.06259-0.68180-0.93422 0.73664
  -4 -10  -3  -13.56    7.12   0-0.41108 0.13136-0.08053-0.59533-0.92963 0.80698
  -4  -9  -2   83.57    8.01   0-0.40717 0.12748-0.07117-0.53647-0.93207 0.84742
  -4  -8  -1   30.83    7.36   0-0.40635 0.12766-0.06922-0.47125-0.93257 0.88495
  -4  -7   0  337.01    9.95   0-0.40979 0.13334-0.07741-0.39506-0.93045 0.92043
  -4  -3   2  122.72    9.39   0-0.41173 0.13805-0.08209-0.11951-0.92921 0.99116
  -4  -2   2 1508.90   21.49   0-0.40421 0.13049-0.06414-0.06955-0.93383 0.99586
  -4   6  -1   18.60   10.37   0-0.40255 0.11964-0.06024 0.46790-0.93479 0.87493
  -4   9  -5    2.11    8.60   0-0.40652 0.11384-0.06961 0.68283-0.93247 0.71796
  -4  10  -7   -1.84    6.99   0-0.40848 0.10948-0.07429 0.75497-0.93127 0.64175
  -3 -11  -5    2.86    6.90   0-0.40848 0.19407-0.07429-0.66812-0.93127 0.73772
  -3  -9  -2   11.99    7.25   0-0.41415 0.20311-0.08793-0.52026-0.92762 0.84717
  -3  -8  -1   63.49    7.55   0-0.41399 0.20465-0.08754-0.45261-0.92773 0.88465
  -3  -5   1  417.48   10.21   0-0.41238 0.20605-0.08365-0.25364-0.92879 0.95905
  -3   8  -4    8.77    7.40   0-0.41108 0.19065-0.08053 0.62523-0.92963 0.75815
  -3  10  -7    3.54    8.53   0-0.40421 0.17711-0.06415 0.74104-0.93383 0.64678
  -2 -10  -4   51.78    8.19   0-0.40946 0.26396-0.07663-0.59908-0.93066 0.77867
  -2  -9  -3    0.10    9.70   0-0.40405 0.26040-0.06376-0.54371-0.93393 0.81948
  -2  -7  -1   52.83   10.38   0-0.40449 0.26453-0.06481-0.40796-0.93367 0.89363
  -2  -6   0  125.40    8.11   0-0.41302 0.27447-0.08520-0.31979-0.92837 0.92596
  -2  -4   1   94.18    9.66   0-0.41479 0.27738-0.08949-0.17950-0.92719 0.96108
  -2   5  -1   -0.96   10.72   0-0.40545 0.26230-0.06708 0.40655-0.93311 0.88349
  -2   6  -2  345.14   10.93   0-0.40946 0.26426-0.07663 0.48434-0.93066 0.84142
  -2   7  -3  152.87   10.38   0-0.40577 0.25836-0.06784 0.54361-0.93291 0.80485
  -2   9  -6   13.35    7.37   0-0.40734 0.25175-0.07156 0.68475-0.93197 0.68791
  -2  10  -8   -3.74    7.72   0-0.40766 0.24596-0.07234 0.75329-0.93177 0.61266
  -2  11 -10    2.61    9.01   0-0.40421 0.23922-0.06415 0.81001-0.93383 0.53689
  -1 -11  -6    0.15    7.22   0-0.41351 0.33585-0.08637-0.65530-0.92805 0.70493
  -1 -10  -5    1.52    9.28   0-0.40421 0.32858-0.06415-0.61041-0.93383 0.74778
  -1  -5   0    6.80    7.88   0-0.41543 0.34718-0.09104-0.24755-0.92676 0.92703
  -1   4  -1  583.58   14.67   0-0.41415 0.34055-0.08793 0.36002-0.92762 0.88207
  -1   7  -4   26.11    7.39   0-0.41431 0.33369-0.08832 0.56459-0.92752 0.76518
  -1   8  -5   13.63   10.00   0-0.40520 0.32184-0.06649 0.61103-0.93325 0.73218
  -1   9  -7    0.21    7.05   0-0.41092 0.32181-0.08014 0.69248-0.92973 0.65345
  -1  10  -9    9.65    7.93   0-0.40946 0.31642-0.07663 0.75859-0.93066 0.57601
  -1  11 -11    2.16    9.20   0-0.40421 0.30634-0.06415 0.81098-0.93383 0.50345
   0 -11  -7    5.97    7.14   0-0.41335 0.40060-0.08598-0.65604-0.92816 0.67223
   0 -10  -6   -4.46    8.45   0-0.40330 0.39515-0.06201-0.61406-0.93436 0.71467
   0  -8  -3   73.70    7.56   0-0.41367 0.40835-0.08676-0.45441-0.92795 0.82121
   0  -5  -1   11.60   11.65   0-0.40456 0.40351-0.06498-0.27262-0.93363 0.89976
   0  -2   0   23.40   21.88   0-0.40547 0.40533-0.06713-0.06670-0.93309 0.93512
   0   3  -1    1.31   10.74   0-0.40619 0.40339-0.06883 0.27117-0.93266 0.89235
   0   8  -6    8.08    7.21   0-0.40652 0.39068-0.06961 0.61490-0.93247 0.69778
   0   9  -8    5.26    7.01   0-0.41044 0.38967-0.07897 0.69261-0.93004 0.61847
   0  10 -10    8.40    7.09   0-0.40766 0.38205-0.07234 0.75466-0.93177 0.54340
   1 -10  -7   -0.43    9.72   0-0.40438 0.46297-0.06454-0.60864-0.93374 0.68018
   1  -8  -4   63.67    7.55   0-0.41399 0.47600-0.08754-0.45360-0.92773 0.78725
   1  -3  -1 1401.35   23.79   0-0.41286 0.47913-0.08482-0.11752-0.92848 0.89847
   1   3  -2  397.84   14.82   0-0.41060 0.47394-0.07936 0.28376-0.92994 0.85598
   1   7  -6   30.61    7.76   0-0.41367 0.46770-0.08676 0.56381-0.92795 0.69856
   1   8  -7   -1.80   10.41   0-0.40421 0.45504-0.06415 0.60854-0.93383 0.66652
   1   9  -9    8.94    7.41   0-0.40652 0.45320-0.06961 0.68359-0.93247 0.58716
   1  10 -12   -0.91    7.61   0-0.41254 0.45080-0.08404 0.76671-0.92869 0.47029
   1  10 -11  -10.68    8.80   0-0.40355 0.44393-0.06259 0.74306-0.93422 0.51419
   2 -11 -10    0.63    7.23   0-0.40946 0.53120-0.07663-0.66325-0.93066 0.56886
   2 -10  -8   -0.81    7.43   0-0.41206 0.53813-0.08287-0.59033-0.92900 0.64208
   2  -5  -3  121.18   12.44   0-0.40428 0.53715-0.06431-0.27329-0.93379 0.83265
   2   3  -3  701.32   18.39   0-0.40537 0.53608-0.06688 0.27163-0.93315 0.82550
   2   6  -6   32.20    7.42   0-0.41447 0.53858-0.08871 0.49780-0.92741 0.70267
   2   7  -7   57.49    8.11   0-0.40750 0.52942-0.07195 0.54869-0.93187 0.66856
   2   8  -9  -11.26    6.73   0-0.41254 0.52836-0.08404 0.62949-0.92869 0.58975
   2   9 -11   -3.78    7.39   0-0.41092 0.52162-0.08014 0.69433-0.92973 0.51417
   2  10 -13   -6.53   10.43   0-0.40429 0.51016-0.06435 0.74773-0.93378 0.44149
   3 -10 -10   -5.01    9.04   0-0.40537 0.59549-0.06688-0.60356-0.93315 0.57496
   3  -9  -8   10.78    8.11   0-0.41367 0.60700-0.08676-0.51979-0.92795 0.64480
   3  -8  -7   18.71    9.69   0-0.40421 0.59856-0.06415-0.47578-0.93383 0.68667
   3  -7  -6   11.44    9.18   0-0.40254 0.60060-0.06023-0.41321-0.93479 0.72563
   3  -6  -5  153.31   12.67   0-0.40433 0.60268-0.06444-0.34117-0.93376 0.76134
   3   4  -5 1012.70   16.77   0-0.40486 0.60090-0.06569 0.33879-0.93345 0.75295
   3   5  -6  111.01    8.85   0-0.40717 0.60083-0.07117 0.41203-0.93207 0.71280
   3   6  -7  100.16   11.13   0-0.40438 0.59618-0.06454 0.47349-0.93374 0.67487
   3   7  -9   64.37    7.55   0-0.41318 0.60071-0.08559 0.56320-0.92826 0.59256
   3   8 -11    8.85    7.32   0-0.41415 0.59590-0.08793 0.63450-0.92762 0.51566
   3   8 -10   14.55    9.30   0-0.40331 0.58645-0.06203 0.60636-0.93435 0.56057
   3   9 -13    2.98    7.23   0-0.40962 0.58541-0.07702 0.69232-0.93056 0.44329
   4 -10 -12   -8.04    8.62   0-0.40913 0.66491-0.07585-0.59518-0.93086 0.50099
   4  -9 -10   -0.88    7.30   0-0.41222 0.67237-0.08326-0.52119-0.92890 0.57389
   4   1  -5    7.95    8.37   0-0.41141 0.67791-0.08131 0.15028-0.92942 0.75613
   4   3  -6   58.62    8.89   0-0.40962 0.67355-0.07702 0.28258-0.93056 0.71708
   4   4  -7    4.02    7.60   0-0.41431 0.67589-0.08832 0.36160-0.92752 0.67509
   4   5  -8  110.68    8.62   0-0.41302 0.67251-0.08520 0.42741-0.92837 0.63575
   4   6  -9    3.39    7.09   0-0.40750 0.66409-0.07195 0.48182-0.93187 0.60178
   4   7 -11    7.62    7.59   0-0.41222 0.66391-0.08326 0.56178-0.92890 0.52201
   4   8 -13    3.96    7.07   0-0.41027 0.65717-0.07858 0.62587-0.93015 0.44647
   5  -9 -13   -6.16    9.99   0-0.40156 0.72576-0.05791-0.54699-0.93535 0.47030
   5  -8 -11   -0.95   10.55   0-0.40421 0.73099-0.06415-0.47198-0.93383 0.54415
   5   2  -7    3.39    9.24   0-0.40303 0.73455-0.06137 0.19885-0.93452 0.68783
   5   3  -8    5.55    6.91   0-0.41206 0.74139-0.08287 0.28868-0.92900 0.64371
   5   4  -9   -0.54    7.21   0-0.41367 0.73966-0.08676 0.36103-0.92795 0.60442
   5   5 -10   -3.06    7.14   0-0.41044 0.73377-0.07897 0.42145-0.93004 0.56787
   5   6 -11  109.67   10.66   0-0.40421 0.72659-0.06415 0.47433-0.93383 0.53058
   5   7 -14  -10.25    7.79   0-0.41463 0.72837-0.08910 0.56953-0.92730 0.41197
   5   7 -13    1.49    9.26   0-0.40495 0.72201-0.06591 0.54704-0.93340 0.45510
   6  -8 -14    3.56    9.16   0-0.40204 0.79185-0.05904-0.47926-0.93508 0.43493
   6  -6 -11   -3.82   12.21   0-0.39771 0.79313-0.04893-0.35179-0.93746 0.55010
   6   1  -9   -2.79    7.57   0-0.41173 0.80859-0.08209 0.15360-0.92921 0.61219
   6   3 -10    4.17    9.69   0-0.40520 0.79968-0.06649 0.27301-0.93325 0.57625
   6   4 -11   -2.66    9.41   0-0.40479 0.79720-0.06552 0.34181-0.93349 0.53760
   6   5 -13    5.40    6.79   0-0.41351 0.80065-0.08637 0.42989-0.92805 0.45542
   6   6 -15    7.99    7.52   0-0.41367 0.79594-0.08676 0.49897-0.92795 0.37852
   6   6 -14   -0.96   10.42   0-0.40454 0.78866-0.06493 0.47792-0.93364 0.42304
   6   7 -16   -5.53    9.56   0-0.40322 0.77979-0.06181 0.54127-0.93441 0.34812
   7  -2 -11    0.64   12.11   0-0.40189 0.86502-0.05869-0.07335-0.93516 0.54831
   7  -1 -11    0.06   11.48   0-0.40421 0.86866-0.06415-0.00021-0.93383 0.54615
   7   0 -11   43.65   11.30   0-0.40413 0.86690-0.06396 0.06835-0.93388 0.54306
   7   2 -12   -4.89   10.00   0-0.40438 0.86388-0.06454 0.20544-0.93374 0.50627
   7   3 -13   10.62    8.42   0-0.40635 0.86402-0.06922 0.27726-0.93257 0.46504
   7   4 -15    3.73    7.17   0-0.41383 0.86656-0.08715 0.36369-0.92784 0.38437
   7   4 -14    7.13    9.62   0-0.40371 0.85838-0.06298 0.33898-0.93412 0.42809
   7   5 -17   -2.28    7.69   0-0.41367 0.86013-0.08676 0.43324-0.92795 0.30883
   7   5 -16    0.40    9.68   0-0.40520 0.85591-0.06649 0.41367-0.93325 0.35083
   8  -3 -15    0.98   11.17   0-0.40516 0.93039-0.06640-0.13196-0.93328 0.39977
   8   0 -15    2.32    7.69   0-0.41270 0.93617-0.08443 0.08960-0.92858 0.39284
   8   1 -15    3.15   11.14   0-0.40472 0.92822-0.06535 0.13835-0.93354 0.39667
   8   2 -16    8.82    9.34   0-0.40624 0.92813-0.06895 0.21047-0.93263 0.35646
   8   3 -17    1.13    9.91   0-0.40438 0.92157-0.06454 0.27594-0.93374 0.32015
 -12  -3  -1    8.69    8.35   0-0.39048-0.44277-0.03378-0.16486-0.94082 0.85545
 -11  -5  -1   -0.07    7.58   0-0.39394-0.37105-0.04170-0.29597-0.93911 0.86002
 -11  -3   0    4.01    7.02   0-0.39631-0.36897-0.04716-0.15296-0.93789 0.89509
 -11  -2   0    6.40   10.29   0-0.38936-0.37624-0.03122-0.10136-0.94136 0.89826
 -11   1   0   -0.74    9.81   0-0.38950-0.37658-0.03153 0.09991-0.94129 0.89602
 -10  -7  -2   -2.14    9.53   0-0.39018-0.30615-0.03310-0.43982-0.94096 0.82971
 -10  -6  -1   -0.50    6.83   0-0.39326-0.30159-0.04013-0.36555-0.93945 0.86539
 -10  -5   0    3.39    6.85   0-0.40067-0.29425-0.05732-0.27851-0.93552 0.89846
 -10  -4   0   12.34    8.99   0-0.38855-0.30659-0.02939-0.23907-0.94173 0.90434
 -10  -2   1    0.15    7.13   0-0.39950-0.29255-0.05458-0.08104-0.93617 0.93479
 -10  -1   1   -1.74    6.95   0-0.39614-0.29649-0.04677-0.02111-0.93798 0.93585
 -10   0   1    0.45    6.66   0-0.39732-0.29568-0.04951 0.04938-0.93735 0.93430
 -10   3   0   -0.73   10.31   0-0.38367-0.31231-0.01837 0.22177-0.94393 0.90113
 -10   6  -2    0.54   12.42   0-0.37250-0.33004 0.00637 0.40466-0.94834 0.82730
  -9  -8  -2    0.89    7.22   0-0.39732-0.22920-0.04951-0.49129-0.93735 0.83101
  -9  -7  -1   -0.90    7.36   0-0.39799-0.22653-0.05107-0.42235-0.93699 0.86769
  -9  -5   0   -2.21    8.30   0-0.38924-0.23556-0.03095-0.30888-0.94141 0.90955
  -9  -4   1   -4.40    6.63   0-0.40101-0.22032-0.05810-0.21319-0.93534 0.93967
  -9  -3   1    1.80   10.23   0-0.39053-0.23336-0.03388-0.16736-0.94080 0.94437
  -9   2   1   -0.44    9.82   0-0.39104-0.23290-0.03505 0.17005-0.94055 0.94006
  -8  -9  -3   10.63    7.40   0-0.39241-0.16907-0.03818-0.56789-0.93988 0.80090
  -8  -8  -2   12.30    9.53   0-0.38967-0.16950-0.03192-0.50717-0.94121 0.83956
  -8  -7  -1   -7.19    9.46   0-0.39001-0.16477-0.03271-0.44118-0.94104 0.87616
  -8  -6   0   10.67    6.87   0-0.39411-0.16140-0.04209-0.36214-0.93902 0.91124
  -8  -4   1    0.38    9.39   0-0.39001-0.16311-0.03271-0.23647-0.94104 0.94936
  -8   6  -1   -0.04    9.96   0-0.38855-0.17243-0.02938 0.43611-0.94173 0.86623
  -8   7  -2   -2.10    9.84   0-0.38889-0.17492-0.03017 0.50512-0.94157 0.82727
  -8   9  -5    0.39    8.12   0-0.39850-0.17379-0.05224 0.66484-0.93672 0.70708
  -7 -10  -4   -5.98    6.91   0-0.39309-0.09762-0.03974-0.63522-0.93954 0.76677
  -7  -5   1    0.51    6.92   0-0.39749-0.08387-0.04990-0.28933-0.93726 0.95046
  -7  -2   2    2.49    7.62   0-0.39631-0.08616-0.04716-0.08730-0.93789 0.98665
  -7  -1   2   23.82   10.10   0-0.39071-0.09076-0.03429-0.03215-0.94071 0.98860
  -7   0   2   -0.71   10.36   0-0.39070-0.09033-0.03427 0.03293-0.94071 0.98783
  -7   8  -3    1.54    8.38   0-0.39292-0.10330-0.03935 0.58510-0.93962 0.78964
  -6 -10  -4   -2.46   10.19   0-0.39087-0.03336-0.03466-0.63931-0.94063 0.77290
  -6  -8  -1   -7.79    7.31   0-0.40117-0.01397-0.05849-0.48310-0.93524 0.87916
  -6  -5   1    7.22    7.20   0-0.39462-0.01966-0.04326-0.29427-0.93876 0.95635
  -6  -3   2    4.50    6.94   0-0.40134-0.01122-0.05888-0.14363-0.93515 0.98893
  -6  -2   2  199.87   11.95   0-0.39168-0.01982-0.03652-0.09777-0.94024 0.99327
  -6   1   2   14.05   10.23   0-0.39377-0.01649-0.04130 0.11018-0.93920 0.98960
  -6   8  -3    1.52    7.01   0-0.39850-0.02894-0.05224 0.59554-0.93672 0.79213
  -6  10  -6    1.22    8.49   0-0.39018-0.04542-0.03310 0.71970-0.94096 0.67987
  -5 -11  -5   -6.47    7.22   0-0.39950 0.04596-0.05458-0.68790-0.93617 0.73467
  -5 -10  -4  -17.40    9.84   0-0.39061 0.03936-0.03407-0.64065-0.94076 0.77603
  -5  -8  -1    5.56    6.70   0-0.40184 0.05346-0.06005-0.48010-0.93487 0.88337
  -5  -5   1    8.68    6.72   0-0.39546 0.05089-0.04521-0.29251-0.93833 0.95996
  -5  -2   2    1.14    8.13   0-0.39292 0.05197-0.03935-0.09751-0.93962 0.99639
  -5   8  -3    0.73    6.96   0-0.39799 0.04032-0.05107 0.59417-0.93699 0.79655
  -5  10  -6    5.08    7.36   0-0.39343 0.02935-0.04052 0.72251-0.93937 0.68187
  -4 -10  -4    0.63    7.35   0-0.39377 0.11182-0.04130-0.63392-0.93920 0.77890
  -4  -6   0  295.40   12.29   0-0.39005 0.11445-0.03280-0.37282-0.94102 0.93081
  -4  -5   1   75.28    7.97   0-0.40117 0.12695-0.05849-0.27849-0.93524 0.96145
  -4  -1   2   35.49    9.83   0-0.39665 0.12300-0.04795-0.01919-0.93771 0.99791
  -4   0   2   -0.42    9.44   0-0.39984 0.12746-0.05537 0.05364-0.93599 0.99538
  -4   5   0   -2.04   10.66   0-0.39138 0.11166-0.03583 0.37416-0.94038 0.92057
  -4   7  -2  131.16    8.52   0-0.39984 0.11504-0.05537 0.52996-0.93599 0.83839
  -4   8  -3   42.37    9.69   0-0.39272 0.10562-0.03890 0.58187-0.93972 0.80343
  -4  10  -6  -10.01    9.97   0-0.39010 0.09417-0.03290 0.71317-0.94100 0.68945
  -4  11  -8   -7.90   10.09   0-0.38967 0.08866-0.03192 0.78036-0.94121 0.61272
  -3 -11  -6    8.50    7.30   0-0.39292 0.17337-0.03935-0.70212-0.93962 0.70922
  -3 -10  -4   -2.65    7.49   0-0.39967 0.18725-0.05498-0.62022-0.93608 0.77988
  -3  -9  -3    4.66    7.90   0-0.39377 0.18042-0.04130-0.56637-0.93920 0.82103
  -3  -8  -2    4.51    9.99   0-0.39051 0.17919-0.03385-0.50617-0.94080 0.85950
  -3  -7  -1   58.10    9.62   0-0.39189 0.18396-0.03701-0.43597-0.94013 0.89610
  -3  -6   0  125.33    8.24   0-0.39816 0.19149-0.05146-0.35396-0.93690 0.92985
  -3  -4   1   25.87    8.35   0-0.39479 0.18937-0.04365-0.22521-0.93868 0.96818
  -3   7  -2   45.43    9.94   0-0.38849 0.17273-0.02925 0.50440-0.94176 0.84781
  -3   9  -5    7.96    7.57   0-0.39799 0.17568-0.05107 0.66413-0.93699 0.72661
  -3  11  -9    6.37    7.35   0-0.39766 0.16589-0.05029 0.80078-0.93717 0.57313
  -2 -11  -6    4.26    7.33   0-0.40134 0.25142-0.05888-0.68305-0.93515 0.70896
  -2 -10  -5   -1.66    9.77   0-0.39018 0.24234-0.03310-0.64007-0.94096 0.75102
  -2  -8  -2   57.81    7.68   0-0.40184 0.26085-0.06005-0.48045-0.93487 0.85787
  -2  -5   0  587.83   13.44   0-0.39170 0.25374-0.03656-0.30097-0.94023 0.93668
  -2  -3   1  975.53   17.28   0-0.39883 0.26193-0.05302-0.14896-0.93654 0.96927
  -2   4   0   80.29   12.67   0-0.38763 0.24630-0.02731 0.29865-0.94216 0.93074
  -2   8  -4   53.08    7.36   0-0.39749 0.24723-0.04990 0.59308-0.93726 0.77110
  -2  10  -7    2.74    8.37   0-0.39189 0.23449-0.03701 0.71863-0.94013 0.65711
  -2  11  -9   -3.72    9.81   0-0.38984 0.22596-0.03232 0.78122-0.94113 0.58302
  -1 -11  -7   -2.47    7.33   0-0.39749 0.31754-0.04990-0.69150-0.93726 0.67648
  -1  -9  -4   -1.78    6.81   0-0.39665 0.32294-0.04795-0.55958-0.93771 0.78895
  -1  -8  -3   14.11    6.89   0-0.39258 0.31822-0.03857-0.50162-0.93979 0.82887
  -1  -7  -2    7.79    7.39   0-0.39326 0.32093-0.04013-0.43315-0.93945 0.86577
  -1  -6  -1  134.51    8.30   0-0.39967 0.32945-0.05498-0.35008-0.93608 0.89965
  -1  -4   0  261.56   11.81   0-0.39445 0.32514-0.04287-0.22673-0.93885 0.93875
  -1   9  -6    2.89    6.42   0-0.39326 0.30793-0.04013 0.65297-0.93945 0.69937
  -1  10  -8    4.30    7.20   0-0.39529 0.30530-0.04482 0.72668-0.93842 0.62158
  -1  11 -10    0.13   10.31   0-0.39155 0.29676-0.03622 0.78640-0.94030 0.54654
   0 -11  -8    1.70    7.07   0-0.39698 0.38422-0.04873-0.69214-0.93753 0.64302
   0  -9  -5    6.23    7.24   0-0.39309 0.38416-0.03974-0.56769-0.93954 0.75780
   0  -6  -2   20.31   10.77   0-0.39040 0.38799-0.03360-0.37163-0.94086 0.87013
   0  -1   0    3.93   22.60   0-0.39020 0.39045-0.03314-0.03433-0.94095 0.94179
   0   5  -2  338.96   13.40   0-0.39008 0.38277-0.03287 0.37272-0.94101 0.86090
   0   6  -3  408.46   10.74   0-0.39428 0.38466-0.04248 0.45061-0.93894 0.82019
   0   7  -4   98.65    9.90   0-0.39174 0.38012-0.03665 0.51314-0.94021 0.78299
   0   9  -7    4.88    6.83   0-0.39462 0.37667-0.04326 0.65632-0.93876 0.66487
   0  10  -9    4.55    7.88   0-0.39496 0.37234-0.04404 0.72603-0.93859 0.58791
   0  11 -11    5.58   10.37   0-0.38969 0.36221-0.03197 0.78304-0.94120 0.51385
   1 -11  -9    4.05    7.91   0-0.40067 0.45303-0.05732-0.68425-0.93552 0.60793
   1  -9  -6    9.97    7.17   0-0.39394 0.45241-0.04170-0.56557-0.93911 0.72356
   1  -5  -2   12.63    8.65   0-0.40034 0.46680-0.05654-0.28138-0.93571 0.86856
   1   1  -1 3067.07   40.63   0-0.39428 0.45995-0.04248 0.11151-0.93894 0.90474
   1   5  -3  188.98    9.33   0-0.39309 0.45307-0.03974 0.38029-0.93954 0.82581
   1   6  -4   30.57    8.01   0-0.39529 0.45366-0.04482 0.45336-0.93842 0.78572
   1   7  -5   22.72    7.62   0-0.39224 0.44820-0.03779 0.51417-0.93996 0.74854
   1   9  -8   13.50    9.16   0-0.39206 0.44156-0.03740 0.65082-0.94005 0.63238
   1  10 -10    3.79    9.82   0-0.39138 0.43613-0.03583 0.71791-0.94038 0.55586
   2 -11 -11   -2.50    7.53   0-0.39360 0.51302-0.04091-0.69872-0.93928 0.53959
   2 -10  -9   13.92    9.07   0-0.39192 0.51328-0.03705-0.63603-0.94012 0.61568
   2  -9  -7    5.10    7.02   0-0.40017 0.52604-0.05615-0.55094-0.93580 0.68643
   2  -8  -6  112.55   11.31   0-0.39123 0.51915-0.03549-0.50540-0.94045 0.72647
   2  -7  -5   18.73    9.46   0-0.38759 0.51778-0.02722-0.44533-0.94218 0.76653
   2  -6  -4   29.34   10.76   0-0.39005 0.52153-0.03280-0.37275-0.94103 0.80255
   2  -2  -2  259.72   21.83   0-0.38611 0.52129-0.02386-0.11163-0.94285 0.87688
   2   1  -2  977.85   25.39   0-0.39189 0.52480-0.03699 0.10628-0.94013 0.87231
   2   5  -4   43.94   10.80   0-0.39018 0.51741-0.03310 0.37350-0.94096 0.79324
   2   6  -5    3.22   10.75   0-0.39121 0.51784-0.03544 0.44392-0.94047 0.75355
   2   8  -8   47.68    7.41   0-0.39766 0.51685-0.05029 0.59529-0.93717 0.63498
   2   9 -10   24.70    7.54   0-0.39917 0.51383-0.05380 0.66781-0.93635 0.55678
   2  10 -12    2.89    7.41   0-0.39496 0.50360-0.04404 0.72657-0.93859 0.48389
   3 -10 -11    4.33    9.33   0-0.38691 0.57367-0.02567-0.64732-0.94249 0.54585
   3  -9  -9   38.54   11.08   0-0.38969 0.58077-0.03198-0.57592-0.94120 0.61809
   3   3  -4    7.67    8.59   0-0.39326 0.59237-0.04013 0.24441-0.93945 0.79732
   3   7  -8   20.92    7.27   0-0.39732 0.58645-0.04951 0.52642-0.93735 0.64033
   3   8  -9   -8.83    8.68   0-0.38932 0.57412-0.03114 0.57465-0.94137 0.60643
   3   9 -12    6.43    7.20   0-0.39984 0.57973-0.05537 0.67027-0.93599 0.48475
   3   9 -11   -4.68    9.86   0-0.38975 0.57026-0.03212 0.64584-0.94117 0.52921
   4  -9 -11    6.49    9.80   0-0.38921 0.64610-0.03089-0.57568-0.94142 0.54848
   4  -8  -9    7.93    7.38   0-0.39783 0.65822-0.05068-0.48823-0.93708 0.61916
   4  -7  -8   60.06   11.43   0-0.38764 0.64965-0.02731-0.44646-0.94216 0.65998
   4  -5  -6   78.34   12.20   0-0.39036 0.65533-0.03350-0.30503-0.94088 0.73335
   4   2  -5   83.03    9.44   0-0.39360 0.65903-0.04091 0.17922-0.93928 0.76500
   4   4  -6   33.74   10.37   0-0.39016 0.65189-0.03304 0.30572-0.94097 0.72605
   4   5  -7   75.45   10.49   0-0.39189 0.65263-0.03701 0.37900-0.94013 0.68699
   4   6  -8   14.86   10.36   0-0.39035 0.64884-0.03349 0.44324-0.94088 0.64810
   4   7 -10   66.01    8.10   0-0.39917 0.65316-0.05380 0.53256-0.93635 0.56644
   4   8 -12    4.27    7.69   0-0.40017 0.64976-0.05615 0.60273-0.93580 0.48958
   4   8 -11   -4.22    9.32   0-0.38958 0.63957-0.03173 0.57676-0.94125 0.53476
   4   9 -14    2.53    7.55   0-0.39563 0.63937-0.04560 0.66123-0.93824 0.41665
   5  -7 -10   -0.57   10.87   0-0.38881 0.71800-0.02997-0.43961-0.94161 0.58881
   5   4  -8   21.40    7.46   0-0.39292 0.72176-0.03935 0.31324-0.93962 0.65315
   5   5  -9   52.71    7.68   0-0.39326 0.71923-0.04013 0.38326-0.93945 0.61403
   5   6 -10   33.42   10.38   0-0.39015 0.71368-0.03302 0.44304-0.94098 0.57566
   5   7 -12    0.35    7.09   0-0.39462 0.71326-0.04326 0.52229-0.93876 0.49876
   5   8 -15   -2.22    7.58   0-0.40117 0.71263-0.05849 0.60690-0.93524 0.38063
   5   8 -14    4.22    7.53   0-0.39309 0.70803-0.03974 0.58723-0.93954 0.42155
   6   2  -9    4.13    6.39   0-0.39799 0.79522-0.05107 0.18920-0.93699 0.61837
   6   4 -10    0.22    9.61   0-0.38924 0.78126-0.03095 0.30493-0.94141 0.58405
   6   5 -12    5.91    7.33   0-0.40117 0.79082-0.05849 0.40130-0.93524 0.50002
   6   6 -13   -0.26    7.77   0-0.39428 0.78039-0.04248 0.45417-0.93894 0.46591
   6   7 -15   -1.56    7.28   0-0.39394 0.77516-0.04170 0.52218-0.93911 0.38944
   7   1 -11   33.70    7.21   0-0.39462 0.85778-0.04326 0.11653-0.93876 0.54795
   7   3 -12   -3.99    9.41   0-0.39044 0.84999-0.03368 0.24225-0.94084 0.51216
   7   4 -13   -0.65    9.72   0-0.39044 0.84739-0.03368 0.31053-0.94084 0.47344
   7   5 -15    4.50    7.38   0-0.39698 0.84965-0.04873 0.39275-0.93753 0.39255
   7   6 -16   -5.35    9.22   0-0.38941 0.83668-0.03134 0.44376-0.94133 0.35945
   8  -2 -14   -3.56   11.01   0-0.39001 0.91597-0.03271-0.09598-0.94104 0.44490
   8  -1 -14    2.91    7.76   0-0.39597 0.92207-0.04638-0.01697-0.93806 0.44060
   8   0 -14    2.63    8.06   0-0.39496 0.92046-0.04404 0.04844-0.93859 0.44022
   8   1 -14   10.75   11.57   0-0.39018 0.91441-0.03310 0.10512-0.94096 0.44170
   8   2 -15    6.31    7.84   0-0.39496 0.91791-0.04404 0.18445-0.93859 0.40046
   8   3 -16   -1.50    7.57   0-0.39479 0.91425-0.04365 0.25405-0.93868 0.36269
 -12  -2  -1    2.28    7.48   0-0.38413-0.45166-0.02077-0.11351-0.94338 0.85839
 -12  -1  -1   -4.29    9.72   0-0.37729-0.45659-0.00552-0.06095-0.94622 0.86022
 -12   0  -1    2.85   10.92   0-0.37711-0.46025-0.00512 0.00900-0.94629 0.85946
 -12   1  -1   -1.28    8.93   0-0.37861-0.45599-0.00845 0.07717-0.94569 0.85792
 -11  -4  -1   10.00    7.81   0-0.38081-0.38606-0.01334-0.25420-0.94480 0.86548
 -11  -1   0   -7.47    7.57   0-0.38326-0.38102-0.01881-0.04846-0.94376 0.90013
 -11   0   0   -0.21    6.61   0-0.38238-0.38253-0.01686 0.01737-0.94413 0.89984
 -10  -5  -1   -2.55    8.64   0-0.37658-0.31640-0.00395-0.33340-0.94649 0.87177
 -10  -3   0    8.69    9.73   0-0.37570-0.31895-0.00201-0.19859-0.94683 0.90876
 -10   7  -3    0.76    9.93   0-0.37516-0.32929-0.00082 0.48007-0.94704 0.78760
  -9  -8  -3    1.49    7.08   0-0.37993-0.24862-0.01138-0.52927-0.94516 0.80110
  -9  -7  -2    1.83    7.34   0-0.37852-0.24819-0.00825-0.46514-0.94573 0.83892
  -9  -6  -1    1.74    7.00   0-0.38063-0.24408-0.01295-0.39302-0.94487 0.87515
  -9  -2   1   -1.79    7.00   0-0.38063-0.24152-0.01295-0.12306-0.94487 0.94825
  -9  -1   1   -2.02    8.85   0-0.37569-0.25139-0.00200-0.06411-0.94684 0.95022
  -9   1   1    2.28   10.50   0-0.37569-0.25007-0.00200 0.07203-0.94684 0.94859
  -8  -9  -4  -13.19   10.06   0-0.37587-0.18415-0.00239-0.60519-0.94677 0.76916
  -8  -5   0   18.53    9.92   0-0.37693-0.17824-0.00473-0.33175-0.94636 0.91816
  -8  -3   1   10.67    9.86   0-0.37649-0.17717-0.00376-0.19775-0.94653 0.95439
  -8   8  -3   -5.33   10.21   0-0.37729-0.18972-0.00552 0.54993-0.94622 0.79489
  -7 -10  -5   -2.01    6.91   0-0.37799-0.11470-0.00708-0.66770-0.94594 0.73519
  -7  -9  -3    0.05    6.84   0-0.38690-0.10174-0.02702-0.58125-0.94214 0.80670
  -7  -8  -2    1.55    7.55   0-0.38361-0.10320-0.01959-0.52157-0.94361 0.84548
  -7  -7  -1   -0.29    7.06   0-0.38343-0.10145-0.01920-0.45463-0.94368 0.88269
  -7  -6   0    3.81    7.20   0-0.38759-0.09813-0.02859-0.37611-0.94182 0.91841
  -7  -4   1  135.08    7.99   0-0.38186-0.09969-0.01568-0.25422-0.94436 0.95748
  -7   9  -4    0.19    8.91   0-0.37887-0.11944-0.00904 0.62300-0.94559 0.75770
  -6 -10  -5  -16.06   10.16   0-0.37542-0.04765-0.00141-0.67442-0.94694 0.74065
  -6  -9  -3   -0.03    7.11   0-0.38395-0.03494-0.02038-0.58762-0.94346 0.81186
  -6  -8  -2    4.95    7.28   0-0.38046-0.03960-0.01256-0.52703-0.94494 0.85135
  -6  -7  -1  130.28    8.67   0-0.38028-0.03509-0.01216-0.46068-0.94501 0.88872
  -6  -6   0   -0.56    6.82   0-0.38448-0.02901-0.02155-0.38529-0.94323 0.92360
  -6  -4   1   -0.21    8.54   0-0.37658-0.03399-0.00395-0.26698-0.94649 0.96260
  -6  -1   2   28.92    8.15   0-0.38413-0.02632-0.02077-0.04556-0.94338 0.99588
  -6   0   2  322.68   12.33   0-0.38256-0.02790-0.01725 0.01849-0.94406 0.99586
  -6   9  -4   -4.80    7.70   0-0.38482-0.04521-0.02233 0.63401-0.94307 0.76060
  -5 -11  -6   -2.26    7.15   0-0.38500 0.02948-0.02272-0.71936-0.94300 0.70320
  -5 -10  -5   10.50    8.50   0-0.37486 0.01812-0.00016-0.67515-0.94715 0.74534
  -5  -9  -3   -8.22    7.06   0-0.38395 0.03459-0.02038-0.58778-0.94346 0.81598
  -5  -8  -2    2.02    6.38   0-0.38028 0.03279-0.01216-0.52895-0.94501 0.85482
  -5  -7  -1   -2.28    6.90   0-0.37993 0.03438-0.01138-0.46237-0.94516 0.89205
  -5  -6   0   23.07    7.61   0-0.38448 0.03853-0.02155-0.38348-0.94323 0.92800
  -5  -4   1   20.11    9.74   0-0.37739 0.03277-0.00574-0.26396-0.94618 0.96737
  -5  -1   2    2.54    8.37   0-0.38517 0.04187-0.02311-0.04422-0.94292 0.99936
  -5   0   2    0.94    8.10   0-0.38326 0.03972-0.01881 0.01925-0.94376 0.99934
  -5   9  -4   -0.47    7.43   0-0.38552 0.02528-0.02389 0.63526-0.94276 0.76433
  -4 -11  -6   -8.04    7.38   0-0.38742 0.10143-0.02820-0.71407-0.94190 0.70626
  -4 -10  -5   -7.21    9.85   0-0.37613 0.09245-0.00297-0.67136-0.94667 0.74774
  -4  -9  -3    7.08    6.99   0-0.38690 0.10410-0.02702-0.58035-0.94214 0.81951
  -4  -8  -2  242.69    8.96   0-0.38343 0.10468-0.01920-0.52161-0.94368 0.85778
  -4  -7  -1  145.51    8.48   0-0.38343 0.10636-0.01920-0.45404-0.94368 0.89484
  -4  -4   1 2064.31   19.00   0-0.38256 0.10778-0.01725-0.25264-0.94406 0.96922
  -4   9  -4   19.25    7.02   0-0.38168 0.09284-0.01529 0.62763-0.94443 0.76920
  -3 -11  -7   -5.92    8.95   0-0.37675 0.15859-0.00434-0.73503-0.94643 0.67669
  -3 -10  -5   -0.38    7.55   0-0.38186 0.16738-0.01568-0.65925-0.94436 0.74990
  -3  -5   0    3.01    9.96   0-0.37569 0.16805-0.00200-0.33628-0.94684 0.93900
  -3  -3   1  794.83   17.54   0-0.37569 0.16970-0.00199-0.20010-0.94684 0.97562
  -3   3   1  731.94   23.55   0-0.37213 0.16387 0.00581 0.19735-0.94815 0.97185
  -3   5   0   -1.64   10.16   0-0.37391 0.16469 0.00192 0.33468-0.94750 0.93151
  -3   6  -1   89.92    8.46   0-0.38638 0.17286-0.02585 0.43302-0.94237 0.88762
  -3   8  -3   21.94    7.58   0-0.38291 0.16584-0.01803 0.56150-0.94391 0.81173
  -3   9  -4    2.13    9.65   0-0.37489 0.15413-0.00024 0.61060-0.94714 0.77660
  -3  10  -6    5.64    6.91   0-0.38308 0.15853-0.01842 0.69992-0.94383 0.69539
  -3  11  -8    1.00    7.38   0-0.38308 0.15210-0.01842 0.76765-0.94383 0.62039
  -2 -11  -7   -7.88    7.70   0-0.38552 0.23628-0.02389-0.71757-0.94276 0.67725
  -2  -9  -4    9.98    6.77   0-0.38238 0.23655-0.01686-0.59053-0.94413 0.79164
  -2  -8  -3    7.89    8.99   0-0.37667 0.23302-0.00416-0.53517-0.94646 0.83100
  -2  -7  -2    7.78   10.14   0-0.37556 0.23383-0.00170-0.47125-0.94689 0.86860
  -2  -6  -1   15.88    6.83   0-0.37958 0.24031-0.01060-0.39415-0.94530 0.90454
  -2  -2   1 6508.69   41.85   0-0.38151 0.24406-0.01490-0.11932-0.94450 0.97637
  -2   9  -5    5.92    7.13   0-0.38638 0.23390-0.02585 0.63880-0.94237 0.73681
  -2  10  -6   -5.36    8.29   0-0.37471 0.21871 0.00016 0.67784-0.94720 0.70446
  -2  11  -8   -5.72   10.00   0-0.37534 0.21411-0.00121 0.74978-0.94697 0.62746
  -1 -11  -8    3.47    7.03   0-0.38151 0.29691-0.01490-0.72642-0.94450 0.64589
  -1 -10  -6    5.21    6.77   0-0.38482 0.30440-0.02233-0.65215-0.94307 0.71955
  -1  -9  -5   16.00    9.19   0-0.37500 0.29678-0.00048-0.60753-0.94710 0.76082
  -1   3   0    4.00   10.26   0-0.38256 0.31221-0.01725 0.22093-0.94406 0.93750
  -1   5  -1    4.91   11.91   0-0.37624 0.30320-0.00320 0.34305-0.94662 0.90049
  -1   6  -2    0.24    7.69   0-0.38552 0.30984-0.02389 0.43027-0.94276 0.85857
  -1   7  -3   37.78    7.01   0-0.38586 0.30667-0.02468 0.50038-0.94261 0.81931
  -1   8  -4   49.79    7.56   0-0.38098 0.30005-0.01373 0.55755-0.94472 0.78255
  -1  10  -7    1.73    7.31   0-0.37923 0.29046-0.00982 0.69041-0.94545 0.66880
  -1  11  -9   -5.54    7.90   0-0.37852 0.28471-0.00825 0.75758-0.94573 0.59238
   0 -11  -9    3.31    7.74   0-0.38098 0.36616-0.01373-0.72682-0.94472 0.61165
   0 -10  -7   -0.04    7.04   0-0.38256 0.37193-0.01725-0.65643-0.94406 0.68594
   0  -8  -4  108.37    8.00   0-0.38673 0.38051-0.02663-0.51422-0.94221 0.79640
   0  -7  -3   14.19    6.87   0-0.38517 0.37970-0.02311-0.45022-0.94292 0.83490
   0  -4  -1   69.22   14.01   0-0.37707 0.37526-0.00503-0.26460-0.94630 0.91209
   0   8  -5   94.30    7.87   0-0.38517 0.37160-0.02311 0.56727-0.94292 0.74729
   0   9  -6   11.98    9.32   0-0.37611 0.36067-0.00292 0.61605-0.94667 0.71137
   0  10  -8   23.81    7.86   0-0.38063 0.36043-0.01295 0.69449-0.94487 0.63267
   0  11 -10   -3.70    7.27   0-0.37835 0.35193-0.00786 0.75741-0.94580 0.55850
   1 -11 -10   -7.34    7.88   0-0.38448 0.43680-0.02155-0.71847-0.94323 0.57638
   1 -10  -8   -0.30    7.02   0-0.38448 0.44096-0.02155-0.65151-0.94323 0.65129
   1  -8  -5    0.02    7.30   0-0.38586 0.44850-0.02468-0.51461-0.94261 0.76278
   1  -7  -4   51.42    7.09   0-0.38273 0.44555-0.01764-0.45540-0.94398 0.80164
   1  -6  -3   -2.46    7.61   0-0.38621 0.45270-0.02546-0.37970-0.94245 0.83690
   1  -2  -1  246.53   17.54   0-0.38569 0.45195-0.02429-0.11006-0.94269 0.91136
   1   4  -2   95.94   10.32   0-0.38046 0.44298-0.01256 0.28473-0.94494 0.87030
   1   8  -6   -0.05    7.46   0-0.38500 0.43855-0.02272 0.56654-0.94300 0.71369
   1   9  -7   -1.15   10.12   0-0.37560 0.42645-0.00180 0.61399-0.94687 0.67888
   1  10  -9   10.49    7.43   0-0.37817 0.42540-0.00747 0.68937-0.94587 0.59981
   1  11 -11   -1.49   10.34   0-0.37525 0.41601-0.00102 0.75035-0.94700 0.52563
   2 -10 -10   -0.35    8.86   0-0.37445 0.49673 0.00074-0.67534-0.94730 0.58330
   2  -9  -8   17.13    9.91   0-0.37621 0.49978-0.00315-0.60328-0.94663 0.65837
   2   4  -3  376.50   11.61   0-0.37905 0.50903-0.00943 0.28217-0.94552 0.83718
   2   7  -6    1.59    7.49   0-0.38725 0.51084-0.02780 0.50391-0.94198 0.71743
   2   8  -7    6.02    7.22   0-0.38046 0.50221-0.01256 0.55763-0.94494 0.68057
   2   9  -9   27.49    7.64   0-0.38569 0.50269-0.02429 0.63800-0.94269 0.60168
   2  10 -11    7.29    7.32   0-0.38430 0.49658-0.02116 0.70347-0.94330 0.52531
   3  -8  -8    4.00    9.90   0-0.37587 0.56940-0.00239-0.53750-0.94677 0.66213
   3  -4  -4   84.86   10.03   0-0.38221 0.58286-0.01647-0.25491-0.94421 0.80770
   3  -1  -3    0.05   15.41   0-0.37702 0.58049-0.00493-0.06205-0.94632 0.84498
   3   0  -3    4.78   11.15   0-0.38517 0.58735-0.02311 0.02372-0.94292 0.84121
   3   1  -3   91.16   12.69   0-0.37569 0.57591-0.00200 0.07153-0.94684 0.84523
   3   5  -5   -0.75    7.27   0-0.38063 0.57670-0.01295 0.35290-0.94487 0.76362
   3   6  -6   13.37    7.75   0-0.38238 0.57633-0.01686 0.42546-0.94413 0.72345
   3   7  -7   15.74    7.86   0-0.37905 0.57067-0.00943 0.48645-0.94552 0.68606
   3   9 -10    2.42    8.97   0-0.37569 0.56141-0.00200 0.61920-0.94684 0.57073
   3  10 -13   -1.22    7.61   0-0.38430 0.56062-0.02116 0.70447-0.94330 0.45504
   3  10 -12   -6.54   10.48   0-0.37534 0.55340-0.00121 0.68320-0.94697 0.49644
   4  -6  -7    4.13    7.05   0-0.38291 0.64728-0.01803-0.38636-0.94391 0.69943
   4  -3  -5  240.41   22.22   0-0.34796 0.61476 0.05731-0.26062-0.95502 0.78261
   4   3  -5  377.76   14.36   0-0.37587 0.64106-0.00238 0.20824-0.94677 0.77134
   4   7  -9   18.82    7.69   0-0.38395 0.64082-0.02038 0.49818-0.94346 0.61213
   4   8 -10   28.24   10.26   0-0.37603 0.63032-0.00274 0.54809-0.94671 0.57640
   4   9 -13    6.50    7.58   0-0.38638 0.63384-0.02585 0.64107-0.94237 0.45745
   4   9 -12    0.25   10.15   0-0.37613 0.62508-0.00297 0.61846-0.94667 0.50109
   5  -8 -12   -0.56    9.29   0-0.37569 0.70092-0.00200-0.53831-0.94684 0.51710
   5  -6  -9    5.16   11.14   0-0.37574 0.70540-0.00210-0.40180-0.94682 0.63035
   5  -5  -8   -0.98   10.43   0-0.37338 0.70477 0.00309-0.33968-0.94770 0.66803
   5  -1  -6    1.86   10.89   0-0.37583 0.71230-0.00230-0.06430-0.94678 0.73994
   5   0  -6   -3.46    7.86   0-0.38238 0.71716-0.01686 0.01910-0.94413 0.73663
   5   1  -6   12.85   10.97   0-0.37640 0.71100-0.00356 0.07247-0.94656 0.73823
   5   3  -7    6.11    7.05   0-0.38552 0.71720-0.02389 0.22916-0.94276 0.69478
   5   5  -8    1.32    8.96   0-0.37480 0.70139-0.00004 0.34018-0.94717 0.66035
   5   7 -11    8.64    7.08   0-0.38221 0.70398-0.01647 0.49467-0.94421 0.54096
   5   8 -13   14.58    7.51   0-0.38343 0.70064-0.01920 0.56626-0.94368 0.46366
   6  -1  -8    1.07    7.83   0-0.38273 0.78277-0.01764-0.04795-0.94398 0.66547
   6   0  -8   -3.01    7.90   0-0.38448 0.78409-0.02155 0.02482-0.94323 0.66402
   6   1  -8   58.30    8.49   0-0.37887 0.77834-0.00904 0.08083-0.94559 0.66522
   6   3  -9   18.82    7.09   0-0.38343 0.78012-0.01920 0.22529-0.94368 0.62395
   6   5 -11    6.01    7.30   0-0.38673 0.77880-0.02663 0.36918-0.94221 0.54474
   6   6 -12   19.12    7.93   0-0.38203 0.77147-0.01607 0.42676-0.94428 0.50798
   6   7 -14    9.13    7.43   0-0.38448 0.76944-0.02155 0.50114-0.94323 0.43015
   6   7 -13  -21.81    9.16   0-0.37516 0.75987-0.00082 0.47923-0.94704 0.47358
   7  -3 -11   -1.47   12.61   0-0.36997 0.83362 0.01052-0.21077-0.94891 0.56169
   7   2 -11   -1.18    7.43   0-0.38430 0.84618-0.02116 0.16132-0.94330 0.55303
   7   4 -12    2.97    9.86   0-0.37569 0.83600-0.00200 0.27729-0.94684 0.51589
   7   5 -14    7.89    7.20   0-0.38638 0.84134-0.02585 0.36952-0.94237 0.43504
   7   5 -13   -5.79    9.47   0-0.37525 0.83042-0.00102 0.34472-0.94700 0.47837
   7   6 -15    1.34    7.53   0-0.37923 0.83080-0.00982 0.42295-0.94545 0.40048
   8  -4 -15   -1.97   16.10   0-0.36112 0.88425 0.02959-0.29526-0.95171 0.41861
   8   0 -13   -2.30    9.48   0-0.37569 0.89998-0.00200 0.00600-0.94684 0.48709
   8   2 -14    0.87    7.67   0-0.38046 0.90493-0.01256 0.15433-0.94494 0.44508
   8   3 -15   -0.85    7.20   0-0.38326 0.90511-0.01881 0.22879-0.94376 0.40520
   8   4 -16   12.71    8.23   0-0.38098 0.90137-0.01373 0.29031-0.94472 0.36636
 -11  -5  -2    9.22    7.50   0-0.37232-0.39602 0.00486-0.33994-0.94787 0.83220
 -11  -3  -1    5.12    6.96   0-0.36837-0.39822 0.01347-0.21334-0.94925 0.86992
 -11   3  -1    2.43   10.21   0-0.35055-0.41513 0.05134 0.15458-0.95426 0.86974
 -10  -7  -3    5.49    7.40   0-0.37178-0.32867 0.00604-0.47653-0.94807 0.79997
 -10  -6  -2    2.76    6.91   0-0.37232-0.32380 0.00486-0.41035-0.94787 0.83666
 -10  -4  -1  -13.03    9.33   0-0.36128-0.33309 0.02871-0.29914-0.95147 0.87662
 -10  -2   0    5.18    7.41   0-0.36456-0.33038 0.02168-0.15443-0.95048 0.91220
  -9  -8  -4   -5.80    8.67   0-0.36182-0.26648 0.02754-0.56629-0.95131 0.76915
  -9  -7  -3    3.80    8.74   0-0.35889-0.27142 0.03379-0.50462-0.95215 0.80781
  -9  -6  -2   -1.56    9.01   0-0.35990-0.26824 0.03164-0.43893-0.95186 0.84527
  -9  -5  -1   -4.65    8.50   0-0.36192-0.26115 0.02734-0.36495-0.95128 0.88098
  -9  -4   0    8.90    7.17   0-0.37250-0.25240 0.00447-0.27309-0.94781 0.91512
  -9   0   1   12.29    7.46   0-0.36927-0.25260 0.01151-0.00906-0.94894 0.95152
  -9   7  -2   -1.65    9.78   0-0.35321-0.27955 0.04577 0.42935-0.95363 0.83691
  -8  -9  -5   11.04    9.63   0-0.36035-0.20456 0.03068-0.63671-0.95174 0.73717
  -8  -8  -3   12.00    7.08   0-0.37089-0.19012 0.00799-0.54672-0.94838 0.80898
  -8  -7  -2    7.41    6.91   0-0.36873-0.19032 0.01268-0.48407-0.94913 0.84690
  -8  -6  -1   -4.90    7.20   0-0.37035-0.18417 0.00916-0.41534-0.94857 0.88323
  -8  -4   0   -6.61    8.88   0-0.36027-0.19421 0.03086-0.30300-0.95176 0.92353
  -8  -2   1   -3.58    8.71   0-0.36256-0.18760 0.02598-0.16175-0.95109 0.95819
  -8   5   0    0.48   13.10   0-0.33819-0.22022 0.07681 0.26458-0.95667 0.92187
  -8   9  -4   -0.33    9.13   0-0.36338-0.20706 0.02422 0.58976-0.95084 0.76120
  -7  -9  -4    1.11    6.95   0-0.36999-0.12045 0.00995-0.61796-0.94870 0.77546
  -7  -8  -3    1.34    7.49   0-0.36420-0.12433 0.02246-0.56317-0.95059 0.81458
  -7  -7  -2    1.83    9.65   0-0.36128-0.12513 0.02871-0.50212-0.95147 0.85258
  -7  -6  -1    3.34    9.43   0-0.36256-0.12499 0.02598-0.43030-0.95109 0.89004
  -7  -5   0   86.57    7.89   0-0.36873-0.11484 0.01268-0.35024-0.94913 0.92530
  -7  -3   1   45.42    7.15   0-0.36620-0.11556 0.01816-0.22052-0.94996 0.96269
  -6 -10  -6   -5.62    8.35   0-0.36045-0.06518 0.03047-0.70712-0.95171 0.70704
  -6  -9  -4   10.36    7.16   0-0.36638-0.05753 0.01777-0.62445-0.94990 0.78133
  -6  -8  -3   -7.42    9.50   0-0.36054-0.05853 0.03027-0.57180-0.95168 0.81998
  -6  -5   0   -0.98    7.26   0-0.36365-0.04965 0.02363-0.36251-0.95076 0.93033
  -6  -3   1   34.93    9.82   0-0.36104-0.05185 0.02922-0.23138-0.95154 0.96947
  -6   4   1    0.64   13.30   0-0.34958-0.06649 0.05337 0.21888-0.95448 0.96555
  -6   7  -1  128.63   11.99   0-0.35869-0.06227 0.03421 0.43985-0.95220 0.88587
  -6   8  -2   19.11    9.49   0-0.35960-0.06468 0.03229 0.51196-0.95195 0.84566
  -6  10  -5   -1.06    7.56   0-0.36963-0.06267 0.01073 0.66920-0.94882 0.72810
  -5  -9  -4    7.15    7.20   0-0.36529 0.01098 0.02011-0.62689-0.95025 0.78557
  -5  -5   0   22.42    9.74   0-0.36292 0.01704 0.02519-0.36230-0.95098 0.93548
  -5   4   1   25.70   10.22   0-0.36010 0.01309 0.03122 0.23880-0.95181 0.96731
  -5   7  -1    0.21    9.34   0-0.36128 0.00918 0.02871 0.44568-0.95147 0.88899
  -5   8  -2   -2.07    9.80   0-0.36091 0.00673 0.02949 0.51572-0.95158 0.84970
  -5  10  -5    3.32    6.99   0-0.37107 0.01008 0.00760 0.67396-0.94832 0.73022
  -4 -11  -8   -1.11    9.19   0-0.36008 0.06958 0.03125-0.77530-0.95181 0.63990
  -4 -11  -7   -1.61    7.56   0-0.37286 0.08493 0.00369-0.74544-0.94768 0.67380
  -4 -10  -6    0.95    8.63   0-0.35981 0.07125 0.03184-0.70602-0.95189 0.71586
  -4  -9  -4   -5.71    7.46   0-0.36746 0.08564 0.01542-0.62343-0.94955 0.78818
  -4  -8  -3    8.91   10.10   0-0.36109 0.07817 0.02910-0.56927-0.95152 0.82826
  -4  -5   0    8.09    7.10   0-0.36638 0.08936 0.01777-0.35568-0.94990 0.93807
  -4  -3   1  226.69   12.81   0-0.36252 0.08762 0.02605-0.22804-0.95110 0.97576
  -4   8  -2  245.78   11.27   0-0.35895 0.07438 0.03366 0.50862-0.95213 0.85455
  -4  10  -5   -4.32    7.18   0-0.36873 0.07581 0.01268 0.66686-0.94913 0.73645
  -4  11  -7    8.13    7.44   0-0.37232 0.07625 0.00486 0.74506-0.94787 0.65696
  -3 -11  -8   -9.46    9.27   0-0.36219 0.14205 0.02676-0.76604-0.95120 0.64341
  -3 -10  -6   -4.64    7.34   0-0.36456 0.14805 0.02168-0.69651-0.95048 0.71795
  -3  -9  -4    4.30    7.27   0-0.37303 0.15775 0.00330-0.61087-0.94761 0.79105
  -3  -8  -3   10.70    7.63   0-0.36674 0.15343 0.01698-0.55710-0.94978 0.83034
  -3  -7  -2   23.11    7.47   0-0.36402 0.15338 0.02285-0.49545-0.95065 0.86834
  -3  -6  -1   76.24    8.07   0-0.36638 0.15784 0.01777-0.42297-0.94990 0.90494
  -3  10  -5   13.96    9.47   0-0.36224 0.14028 0.02665 0.65487-0.95118 0.74136
  -3  11  -7    3.93    7.61   0-0.36728 0.14074 0.01581 0.73369-0.94961 0.66264
  -2 -11  -8    8.36    7.27   0-0.37053 0.21648 0.00877-0.75032-0.94851 0.64555
  -2 -10  -6    0.89    7.73   0-0.37268 0.22558 0.00408-0.67879-0.94774 0.71917
  -2  -9  -5   -2.77    9.57   0-0.36109 0.21346 0.02910-0.63604-0.95152 0.76050
  -2  -4   0   73.04    9.25   0-0.36674 0.22868 0.01698-0.28644-0.94979 0.94547
  -2  -1   1 4676.72   45.52   0-0.36218 0.22459 0.02677-0.09316-0.95120 0.98234
  -2   6  -1   11.69    7.44   0-0.36692 0.22367 0.01659 0.39209-0.94973 0.89871
  -2   7  -2    0.38    6.87   0-0.37196 0.22645 0.00565 0.46882-0.94800 0.85941
  -2   8  -3   16.38    6.98   0-0.36981 0.22198 0.01034 0.53384-0.94876 0.82055
  -2   9  -4   13.47    9.13   0-0.36329 0.21310 0.02441 0.58719-0.95087 0.78439
  -2  11  -7    8.64    8.37   0-0.36002 0.20314 0.03139 0.71617-0.95183 0.66913
  -1 -11  -9   -0.02    6.99   0-0.36638 0.28224 0.01777-0.75874-0.94990 0.61230
  -1 -10  -7   -2.58    6.87   0-0.36656 0.28664 0.01737-0.69157-0.94984 0.68735
  -1  -8  -4   33.48    7.33   0-0.36656 0.29118 0.01737-0.55797-0.94984 0.79963
  -1  -7  -3   33.29    9.64   0-0.36256 0.28871 0.02598-0.49911-0.95109 0.83856
  -1  -6  -2    4.76    7.17   0-0.36365 0.29113 0.02363-0.42921-0.95076 0.87568
  -1  -5  -1   -0.27    7.74   0-0.37268 0.30444 0.00408-0.34264-0.94774 0.90906
  -1  -3   0    2.91   12.04   0-0.36891 0.30005 0.01229-0.21554-0.94907 0.94758
  -1   9  -5    4.09    6.59   0-0.37232 0.28973 0.00486 0.60795-0.94787 0.74664
  -1  10  -6    1.76   10.02   0-0.36146 0.27645 0.02832 0.65282-0.95142 0.71140
  -1  11  -8   -5.59    7.13   0-0.36438 0.27317 0.02207 0.72669-0.95053 0.63531
   0 -11 -10   -0.42    7.61   0-0.36583 0.34885 0.01894-0.75950-0.95008 0.57862
   0 -10  -8    8.34    6.86   0-0.36420 0.34903 0.02246-0.69692-0.95059 0.65485
   0  -9  -6   11.40    7.26   0-0.37035 0.35934 0.00916-0.61674-0.94857 0.72801
   0  -8  -5   94.45    9.96   0-0.36063 0.35303 0.03008-0.57136-0.95166 0.76741
   0   4  -1   76.07   10.15   0-0.37196 0.36733 0.00565 0.26647-0.94800 0.90712
   0   6  -2    4.93    9.92   0-0.36088 0.35473 0.02955 0.37533-0.95158 0.87026
   0   7  -3    4.32    7.39   0-0.36365 0.35541 0.02363 0.45219-0.95076 0.83105
   0   8  -4  107.44   10.32   0-0.36164 0.34986 0.02793 0.51604-0.95136 0.79373
   0  10  -7   16.28    8.01   0-0.36474 0.34705 0.02128 0.65980-0.95042 0.67633
   0  11  -9   21.51    7.51   0-0.36547 0.34320 0.01972 0.73025-0.95019 0.59935
   1 -11 -11    1.77    7.89   0-0.36945 0.41959 0.01112-0.75124-0.94888 0.54359
   1 -10  -9   -6.17    7.27   0-0.36583 0.42016 0.01894-0.69208-0.95008 0.61979
   1  -9  -7    5.04    7.11   0-0.37053 0.42683 0.00877-0.61606-0.94851 0.69390
   1  -8  -6    4.29    8.89   0-0.36085 0.42011 0.02961-0.57321-0.95159 0.73423
   1  -4  -2  100.40   10.54   0-0.36601 0.43095 0.01855-0.28851-0.95002 0.88207
   1   2  -1  249.68   14.83   0-0.36855 0.43374 0.01307 0.12371-0.94919 0.91415
   1   6  -3    8.67    7.19   0-0.36493 0.42642 0.02089 0.38679-0.95036 0.83545
   1   7  -4   52.54    8.01   0-0.36692 0.42476 0.01659 0.45965-0.94973 0.79668
   1   8  -5   -0.86    6.98   0-0.36383 0.41982 0.02324 0.52021-0.95070 0.75939
   1  10  -8    5.57    7.47   0-0.36383 0.41350 0.02324 0.65807-0.95070 0.64263
   1  11 -10    0.90    9.55   0-0.36219 0.40627 0.02676 0.72528-0.95120 0.56776
   2  -8  -7   -9.52   10.15   0-0.36192 0.48923 0.02734-0.56537-0.95128 0.69901
   2  -4  -3  233.03   11.76   0-0.36474 0.49782 0.02128-0.29190-0.95042 0.84780
   2   2  -2  652.38   17.77   0-0.37160 0.50437 0.00643 0.13145-0.94813 0.87902
   2   6  -4   36.09    8.47   0-0.36402 0.49179 0.02285 0.38577-0.95065 0.80204
   2   7  -5    3.85    7.38   0-0.36511 0.49154 0.02050 0.45566-0.95031 0.76261
   2   8  -6  108.16   10.82   0-0.36146 0.48426 0.02832 0.51626-0.95142 0.72561
   2   9  -8   -3.76    6.75   0-0.37089 0.48938 0.00799 0.60478-0.94838 0.64649
   2  10 -10    3.93    7.15   0-0.37250 0.48735 0.00447 0.67752-0.94781 0.56775
   2  10  -9    9.71    8.91   0-0.36060 0.47677 0.03016 0.64870-0.95167 0.61002
   3 -10 -12   -3.93    7.52   0-0.36837 0.55478 0.01347-0.68543-0.94925 0.51344
   3  -9 -10   -2.97    7.88   0-0.36601 0.55662 0.01855-0.62371-0.95002 0.58923
   3  -7  -7   12.15    9.77   0-0.36229 0.55686 0.02653-0.49819-0.95117 0.70264
   3  -5  -5   -0.06   10.72   0-0.35852 0.55742 0.03457-0.37208-0.95225 0.77814
   3   2  -3   27.02   14.15   0-0.36274 0.56299 0.02558 0.11092-0.95104 0.84824
   3   4  -4  155.84    9.03   0-0.37142 0.56870 0.00682 0.26683-0.94819 0.80547
   3   8  -8   -3.56    6.66   0-0.37250 0.56076 0.00447 0.54016-0.94781 0.65049
   3   9  -9   52.02    7.66   0-0.36347 0.54983 0.02402 0.58911-0.95082 0.61376
   3  10 -11    1.67    7.80   0-0.36420 0.54504 0.02246 0.65933-0.95059 0.53799
   4  -9 -12    4.13    8.78   0-0.36109 0.61314 0.02910-0.63123-0.95152 0.51956
   4  -8 -10   19.07    8.06   0-0.36710 0.62503 0.01620-0.55585-0.94967 0.59165
   4   5  -6   89.07    8.55   0-0.36801 0.63033 0.01425 0.32698-0.94937 0.73411
   4   6  -7    3.64    7.53   0-0.37017 0.63147 0.00956 0.39913-0.94863 0.69376
   4   7  -8   44.24    7.49   0-0.36728 0.62546 0.01581 0.46163-0.94961 0.65671
   4   8  -9    7.01    9.97   0-0.36146 0.61789 0.02832 0.51682-0.95142 0.61891
   4   9 -11   14.82    7.43   0-0.36529 0.61723 0.02011 0.59389-0.95025 0.54099
   5   2  -6    2.23    7.12   0-0.36692 0.70091 0.01659 0.12026-0.94973 0.74011
   5   4  -7    3.60    7.26   0-0.36873 0.70006 0.01268 0.26019-0.94913 0.69989
   5   6  -9    2.39    7.03   0-0.37303 0.69857 0.00330 0.40608-0.94761 0.62163
   5   7 -10   -4.81    7.03   0-0.36819 0.69147 0.01386 0.46404-0.94931 0.58475
   5   8 -12    2.68    7.54   0-0.37286 0.69122 0.00369 0.54288-0.94768 0.50648
   5   8 -11    5.76   10.46   0-0.36073 0.68243 0.02988 0.51621-0.95163 0.54717
   5   9 -13    7.86   10.57   0-0.36109 0.67867 0.02910 0.58625-0.95152 0.47033
   6  -7 -13   -1.38    9.61   0-0.36356 0.75403 0.02383-0.49105-0.95079 0.48746
   6  -2  -8   19.39   11.82   0-0.36156 0.76352 0.02810-0.16026-0.95139 0.67078
   6   2  -8   19.48    7.26   0-0.36999 0.76967 0.00995 0.12832-0.94870 0.66631
   6   4  -9    6.48    7.37   0-0.36819 0.76480 0.01386 0.25970-0.94931 0.62810
   6   5 -10    0.16    7.39   0-0.37071 0.76402 0.00838 0.33392-0.94845 0.58925
   6   6 -11    2.57    7.09   0-0.36837 0.75922 0.01347 0.39713-0.94925 0.55142
   6   7 -12   12.45    9.42   0-0.36201 0.75245 0.02714 0.45235-0.95125 0.51308
   6   8 -14    1.78    7.82   0-0.36474 0.74790 0.02128 0.52603-0.95042 0.43727
   7  -1 -10    3.56    9.45   0-0.36317 0.82950 0.02466-0.09006-0.95091 0.59926
   7   0 -10   -4.07    7.54   0-0.37053 0.83512 0.00877-0.00479-0.94851 0.59697
   7   1 -10    1.42    6.95   0-0.36801 0.83226 0.01425 0.05738-0.94937 0.59709
   7   2 -10   20.57   10.05   0-0.36143 0.82564 0.02839 0.11014-0.95143 0.59775
   7   3 -11   -2.69    6.88   0-0.37286 0.83402 0.00369 0.20373-0.94768 0.55599
   7   4 -11   32.23    9.52   0-0.36084 0.82074 0.02964 0.24426-0.95160 0.55826
   7   5 -12    0.88    9.58   0-0.36100 0.81914 0.02930 0.31399-0.95155 0.52043
   7   6 -14    1.15    6.85   0-0.36927 0.82303 0.01151 0.40068-0.94894 0.44128
   8  -3 -14    0.41   11.52   0-0.36347 0.88949 0.02402-0.22329-0.95082 0.45332
   8  -1 -13    1.03    8.23   0-0.36837 0.89635 0.01347-0.07564-0.94925 0.48883
   8   1 -13    7.17    7.63   0-0.36999 0.89759 0.00995 0.06144-0.94870 0.48594
   8   2 -13   14.11    9.88   0-0.36365 0.89106 0.02363 0.11597-0.95076 0.48682
   8   3 -14   -1.22    7.34   0-0.37017 0.89423 0.00956 0.19945-0.94863 0.44722
   8   4 -15    4.68    8.07   0-0.37053 0.89299 0.00877 0.26689-0.94851 0.40732
   8   4 -14    1.83    9.28   0-0.35962 0.88106 0.03223 0.24355-0.95194 0.45041
 -12  -2  -2    3.47    7.31   0-0.35490-0.48322 0.04149-0.17274-0.95311 0.83088
 -12  -1  -2    0.89   10.93   0-0.34609-0.49310 0.05983-0.12343-0.95513 0.83275
 -11  -5  -3   -1.88    7.50   0-0.35079-0.41778 0.05008-0.38738-0.95411 0.80018
 -11  -4  -2    8.64    7.66   0-0.35601-0.41211 0.03915-0.30625-0.95283 0.83603
 -11  -2  -1    0.46    7.30   0-0.35620-0.40906 0.03876-0.17339-0.95278 0.87270
 -11  -1  -1    3.98   10.01   0-0.34628-0.42075 0.05944-0.12369-0.95509 0.87439
 -10  -7  -4   -2.25    7.19   0-0.35341-0.34649 0.04461-0.51690-0.95349 0.76655
 -10  -6  -3    4.03    7.02   0-0.35173-0.34875 0.04813-0.45076-0.95389 0.80469
 -10  -5  -2   -9.96    6.96   0-0.35378-0.34256 0.04383-0.38153-0.95339 0.84120
 -10  -3  -1   -1.64    9.93   0-0.34562-0.34957 0.06081-0.26390-0.95523 0.88007
 -10  -1   0    8.94    7.36   0-0.35452-0.34046 0.04227-0.10718-0.95321 0.91421
 -10   0   0    0.92    9.45   0-0.34741-0.34782 0.05710-0.05421-0.95486 0.91514
 -10   1   0   -2.19   10.41   0-0.34590-0.35002 0.06022 0.01051-0.95517 0.91509
 -10   2   0   -3.54    9.30   0-0.34873-0.34462 0.05437 0.08093-0.95457 0.91329
  -9  -8  -5    0.12    9.68   0-0.34553-0.28845 0.06100-0.59874-0.95525 0.73520
  -9  -4  -1    0.43    8.66   0-0.34486-0.28166 0.06237-0.33418-0.95538 0.88515
  -9  -3   0    7.22    7.49   0-0.35694-0.26809 0.03719-0.23798-0.95258 0.91905
  -9   8  -3   -4.82    8.51   0-0.34864-0.28812 0.05457 0.49058-0.95459 0.79989
  -8  -9  -6   -4.92    8.51   0-0.34534-0.21999 0.06139-0.67034-0.95529 0.70151
  -8  -8  -4   -3.88    7.21   0-0.35266-0.20775 0.04617-0.58660-0.95367 0.77544
  -8  -7  -3   -1.71    8.69   0-0.34685-0.20990 0.05827-0.52995-0.95498 0.81357
  -8  -6  -2    0.59    9.22   0-0.34628-0.20991 0.05944-0.46515-0.95509 0.85123
  -8  -5  -1   -4.68    7.12   0-0.34986-0.20512 0.05203-0.39059-0.95432 0.88815
  -8  -1   1   15.71    7.19   0-0.35173-0.20098 0.04813-0.11457-0.95389 0.96095
  -8   0   1    4.27    8.83   0-0.34249-0.21129 0.06724-0.06579-0.95584 0.96220
  -8   2   1    1.29    9.65   0-0.34435-0.21019 0.06342 0.07388-0.95548 0.96052
  -7  -9  -5    3.36    6.83   0-0.35322-0.13951 0.04500-0.65286-0.95353 0.74196
  -7  -8  -4   -7.01    9.80   0-0.34543-0.14546 0.06120-0.60249-0.95527 0.78128
  -7  -4   0    7.90    6.92   0-0.34835-0.13745 0.05515-0.32433-0.95466 0.92985
  -7  -2   1  176.42    8.66   0-0.35004-0.13220 0.05164-0.18607-0.95428 0.96636
  -7   7  -1   -2.54    9.87   0-0.34534-0.14552 0.06139 0.41306-0.95529 0.88498
  -7   8  -2    1.72    9.58   0-0.34839-0.14426 0.05508 0.49035-0.95465 0.84483
  -7   9  -3    4.07    8.44   0-0.34325-0.15176 0.06568 0.54756-0.95569 0.80730
  -6 -10  -7   11.63    8.52   0-0.34552-0.08555 0.06101-0.73641-0.95525 0.67272
  -6  -9  -5    6.42    6.97   0-0.34854-0.07756 0.05476-0.66103-0.95461 0.74757
  -6  -7  -2   62.78    7.77   0-0.35657-0.06132 0.03797-0.51095-0.95268 0.85787
  -6  -6  -1   18.62    7.10   0-0.35749-0.06028 0.03602-0.44092-0.95243 0.89524
  -6   6   0    1.96    9.43   0-0.34495-0.07278 0.06220 0.34548-0.95536 0.92625
  -6   9  -3    4.54    7.36   0-0.35266-0.07275 0.04617 0.56711-0.95367 0.80896
  -6  10  -4    3.56    8.80   0-0.34211-0.08578 0.06802 0.61317-0.95591 0.77269
  -5 -10  -6    8.15    7.01   0-0.35804-0.00049 0.03485-0.70869-0.95228 0.71194
  -5  -9  -5    0.33    9.68   0-0.34638-0.00682 0.05925-0.66652-0.95508 0.75098
  -5  -8  -3    0.74    6.55   0-0.35860 0.00907 0.03368-0.57465-0.95213 0.82371
  -5  -7  -2    4.05    6.81   0-0.35527 0.00467 0.04071-0.51324-0.95302 0.86260
  -5  -6  -1   27.88    7.51   0-0.35601 0.00854 0.03915-0.44415-0.95283 0.89970
  -5  -3   1  191.85    9.69   0-0.35749 0.01450 0.03602-0.23745-0.95243 0.97306
  -5   6   0   10.86    9.64   0-0.34767-0.00107 0.05656 0.35117-0.95480 0.93089
  -5   9  -3    6.11    7.36   0-0.35545-0.00043 0.04032 0.57265-0.95297 0.81222
  -5  10  -4    0.61   10.07   0-0.34609-0.01199 0.05983 0.62072-0.95513 0.77527
  -5  11  -6    4.70    7.22   0-0.35471-0.00808 0.04188 0.70802-0.95316 0.69689
  -4  -9  -5    2.39    8.73   0-0.34779 0.06074 0.05632-0.66305-0.95478 0.75564
  -4  -7  -2  129.37    8.29   0-0.35749 0.07848 0.03602-0.50905-0.95243 0.86582
  -4  -6  -1   -1.47    7.48   0-0.35860 0.08229 0.03368-0.44013-0.95213 0.90222
  -4   4   1 2060.90   31.73   0-0.34654 0.06918 0.05890 0.21199-0.95504 0.97478
  -4   6   0  307.98   13.75   0-0.34386 0.06380 0.06443 0.34219-0.95558 0.93575
  -4   7  -1  150.53    8.96   0-0.35675 0.07471 0.03758 0.43698-0.95263 0.89427
  -4   9  -3   15.85    6.97   0-0.35322 0.06779 0.04500 0.56686-0.95353 0.81722
  -4  10  -4    6.72    8.82   0-0.34541 0.05740 0.06125 0.61729-0.95527 0.77977
  -4  11  -6   -5.62    7.55   0-0.35322 0.05803 0.04500 0.70331-0.95353 0.70283
  -3 -11  -9    1.64    7.73   0-0.34892 0.12596 0.05398-0.79534-0.95453 0.60825
  -3 -10  -7   -3.87    9.16   0-0.34656 0.12835 0.05886-0.73166-0.95504 0.68402
  -3  -9  -5    8.53    7.11   0-0.35248 0.13492 0.04657-0.65362-0.95371 0.75857
  -3  -4   0    4.44    7.82   0-0.34911 0.14137 0.05359-0.32392-0.95449 0.94560
  -3  -2   1    9.12   10.31   0-0.35285 0.14734 0.04578-0.18057-0.95362 0.98125
  -3   7  -1   47.08    9.71   0-0.34678 0.13426 0.05841 0.41672-0.95499 0.90049
  -3   8  -2   -1.66    7.58   0-0.35023 0.13502 0.05125 0.49106-0.95424 0.86128
  -3   9  -3   13.13    9.94   0-0.34666 0.13016 0.05866 0.55301-0.95502 0.82271
  -3  11  -6   -0.50    9.11   0-0.34854 0.12478 0.05476 0.69473-0.95461 0.70637
  -2 -11  -9   -7.50    7.63   0-0.35564 0.20207 0.03993-0.78111-0.95292 0.61062
  -2 -10  -7   -4.88    7.59   0-0.35490 0.20553 0.04149-0.71610-0.95311 0.68609
  -2  -8  -4   38.03    7.19   0-0.35229 0.20746 0.04696-0.58763-0.95376 0.79943
  -2  -7  -3  142.97   10.99   0-0.34624 0.20307 0.05953-0.53265-0.95510 0.83797
  -2  -6  -2  322.55   12.04   0-0.34568 0.20440 0.06068-0.46621-0.95522 0.87632
  -2  -5  -1   -1.97    7.09   0-0.35061 0.21288 0.05047-0.38920-0.95415 0.91134
  -2   2   1 6381.66   71.32   0-0.34776 0.20944 0.05639 0.07995-0.95479 0.98391
  -2   5   0  618.48   16.25   0-0.34772 0.20632 0.05646 0.28320-0.95479 0.94351
  -2  10  -5    2.91    6.60   0-0.35322 0.20136 0.04500 0.63575-0.95353 0.74794
  -1 -11 -10    1.32    6.98   0-0.35154 0.26515 0.04852-0.78930-0.95393 0.57774
  -1 -10  -8    2.31    6.86   0-0.34835 0.26616 0.05515-0.72901-0.95466 0.65362
  -1  -9  -6    7.40    6.82   0-0.35266 0.27197 0.04617-0.65352-0.95367 0.72854
  -1   4   0  260.98   14.58   0-0.34793 0.27603 0.05603 0.21589-0.95475 0.94818
  -1   6  -1  153.08   11.12   0-0.34452 0.26981 0.06308 0.34457-0.95545 0.90893
  -1   7  -2    5.53    6.85   0-0.35304 0.27777 0.04539 0.43021-0.95358 0.86819
  -1   8  -3    5.87    7.04   0-0.35378 0.27614 0.04383 0.49996-0.95339 0.82922
  -1   9  -4   11.82    6.78   0-0.34929 0.26930 0.05320 0.55896-0.95445 0.79158
  -1  11  -7   13.59    9.29   0-0.34779 0.26091 0.05633 0.69384-0.95478 0.67652
   0 -11 -11    3.29    7.57   0-0.35117 0.33197 0.04930-0.78981-0.95402 0.54399
   0 -10  -9    4.94    9.12   0-0.34553 0.32820 0.06100-0.73485-0.95525 0.62050
   0  -9  -7    9.32    8.84   0-0.34731 0.33393 0.05732-0.66342-0.95488 0.69575
   0  -7  -4   82.90    7.44   0-0.35304 0.34641 0.04539-0.51841-0.95358 0.80659
   0  -6  -3  396.91   10.85   0-0.35117 0.34612 0.04930-0.45459-0.95402 0.84456
   0  -5  -2  347.07   11.25   0-0.35749 0.35388 0.03602-0.37365-0.95243 0.88066
   0   1   0    2.33   13.97   0-0.35841 0.35822 0.03407 0.03385-0.95218 0.95143
   0   9  -5   11.75    7.50   0-0.35545 0.34286 0.04032 0.57224-0.95297 0.75617
   0  10  -6   10.80   10.13   0-0.34666 0.33165 0.05866 0.62192-0.95502 0.71937
   0  11  -8   -0.89    7.40   0-0.35117 0.33012 0.04930 0.69912-0.95402 0.64319
   1 -10 -10    2.12    8.42   0-0.34685 0.39884 0.05827-0.72991-0.95498 0.58651
   1  -9  -8   18.34    8.80   0-0.34702 0.40085 0.05791-0.66367-0.95494 0.66187
   1  -7  -5   25.03    6.88   0-0.34892 0.40956 0.05398-0.52721-0.95453 0.77323
   1  -6  -4   30.67   10.60   0-0.34448 0.40710 0.06316-0.46737-0.95546 0.81245
   1  -5  -3  179.51   13.02   0-0.34753 0.41101 0.05686-0.39442-0.95483 0.84882
   1   3  -1 1399.05   22.93   0-0.34741 0.41222 0.05710 0.14743-0.95486 0.91921
   1   5  -2    4.08    7.73   0-0.35378 0.41800 0.04383 0.29585-0.95339 0.87759
   1   9  -6    6.91    7.30   0-0.35675 0.41156 0.03758 0.57520-0.95263 0.72184
   1  10  -7   12.94    9.21   0-0.34760 0.39989 0.05671 0.62388-0.95482 0.68511
   1  11  -9    2.23    7.57   0-0.35023 0.39655 0.05125 0.69747-0.95424 0.60937
   2 -10 -11    7.64    7.28   0-0.35471 0.47196 0.04188-0.71571-0.95316 0.55071
   2  -9  -9   28.13    7.69   0-0.35341 0.47526 0.04461-0.65219-0.95349 0.62542
   2  -7  -6   -1.82    6.27   0-0.35154 0.48094 0.04852-0.52025-0.95393 0.73870
   2  -6  -5    3.70   10.48   0-0.34561 0.47530 0.06083-0.46648-0.95523 0.77781
   2  -5  -4   47.72   11.52   0-0.34613 0.47686 0.05976-0.39672-0.95513 0.81527
   2   3  -2 2805.85   25.27   0-0.35285 0.48492 0.04578 0.15894-0.95362 0.88413
   2   5  -3  116.31    8.52   0-0.35527 0.48493 0.04071 0.29970-0.95302 0.84399
   2   9  -7   -0.69    7.13   0-0.35415 0.47518 0.04305 0.56890-0.95330 0.68965
   2  10  -8   22.32    8.87   0-0.34533 0.46434 0.06141 0.61763-0.95529 0.65193
   2  11 -10   -0.65   10.48   0-0.34590 0.45946 0.06022 0.68902-0.95517 0.57636
   3 -10 -13   -7.87    7.42   0-0.35098 0.53520 0.04969-0.72155-0.95407 0.47967
   3  -9 -11    4.95    9.35   0-0.34397 0.53099 0.06421-0.67137-0.95556 0.55592
   3  -8  -9    8.94    9.44   0-0.34536 0.53606 0.06134-0.60061-0.95528 0.63102
   3  -6  -6   15.81    7.15   0-0.35601 0.55264 0.03915-0.44439-0.95283 0.74128
   3   3  -3   -1.26   11.61   0-0.34685 0.54918 0.05827 0.14615-0.95498 0.85079
   3   5  -4   77.94    7.92   0-0.35023 0.54735 0.05125 0.28957-0.95424 0.81124
   3   6  -5   60.71    8.50   0-0.35749 0.55272 0.03602 0.37399-0.95243 0.76997
   3   7  -6   -1.74    7.21   0-0.35823 0.55178 0.03446 0.44152-0.95223 0.73182
   3   8  -7   27.97    7.20   0-0.35452 0.54590 0.04227 0.50260-0.95321 0.69350
   3   9  -8   -1.93    8.72   0-0.34685 0.53590 0.05827 0.55603-0.95498 0.65718
   3  10 -10   -7.89    7.39   0-0.35173 0.53539 0.04813 0.63315-0.95389 0.57965
   4  -9 -13    8.87    9.33   0-0.34499 0.59804 0.06211-0.67014-0.95536 0.48319
   4  -7  -9   12.80    9.99   0-0.34707 0.60682 0.05781-0.52934-0.95493 0.63399
   4   0  -4  342.97   16.02   0-0.34945 0.61805 0.05288-0.05061-0.95441 0.81905
   4   1  -4   -4.04    8.59   0-0.35229 0.62151 0.04696 0.02166-0.95376 0.81687
   4   2  -4 1153.40   19.59   0-0.34609 0.61349 0.05984 0.07774-0.95513 0.81842
   4   4  -5    9.33    7.66   0-0.35823 0.62449 0.03446 0.23764-0.95223 0.77506
   4   6  -6  100.62   10.60   0-0.34701 0.60989 0.05795 0.35084-0.95494 0.73931
   4   7  -7   12.50    7.31   0-0.34817 0.60973 0.05554 0.42102-0.95470 0.69929
   4   8  -8    7.75   10.02   0-0.34583 0.60386 0.06037 0.48305-0.95519 0.66058
   4   9 -10    0.81    6.84   0-0.35229 0.60580 0.04696 0.56638-0.95376 0.58412
   4  10 -12    0.20    7.97   0-0.35266 0.60145 0.04617 0.63597-0.95367 0.50741
   5  -8 -13    4.05   10.69   0-0.34590 0.66809 0.06022-0.59968-0.95517 0.48728
   5  -7 -11   -5.09   10.91   0-0.34590 0.67238 0.06022-0.52973-0.95517 0.56242
   5  -2  -6   -0.75   12.29   0-0.33657 0.67125 0.07932-0.21225-0.95684 0.75017
   5   3  -6   -0.36    7.30   0-0.35415 0.68784 0.04305 0.16182-0.95330 0.74327
   5   5  -7  316.61    9.94   0-0.35079 0.68105 0.05008 0.29181-0.95411 0.70507
   5   6  -8   16.07    7.82   0-0.35397 0.68320 0.04344 0.36555-0.95335 0.66470
   5   7  -9   86.52    8.36   0-0.35229 0.67820 0.04696 0.43091-0.95376 0.62658
   5   8 -10    7.57   10.43   0-0.34668 0.67122 0.05862 0.48701-0.95501 0.58886
   5   9 -12   -0.73    7.62   0-0.35061 0.66925 0.05047 0.56381-0.95415 0.51253
   6   3  -8    6.31    7.33   0-0.35823 0.75737 0.03446 0.17068-0.95223 0.66980
   6   4  -8    9.55    9.88   0-0.34590 0.74391 0.06022 0.21228-0.95517 0.67181
   6   5  -9   -1.66    7.06   0-0.35173 0.74769 0.04813 0.29360-0.95389 0.63275
   6   6 -10   50.61    7.60   0-0.35266 0.74635 0.04617 0.36374-0.95367 0.59334
   6   7 -11   18.13    7.41   0-0.34929 0.74108 0.05320 0.42440-0.95445 0.55495
   6   8 -13    2.76    7.91   0-0.35415 0.74027 0.04305 0.50377-0.95330 0.47833
   7  -2 -10    0.00   12.66   0-0.33733 0.80271 0.07776-0.21090-0.95672 0.60587
   7   3 -10    9.06    7.17   0-0.35154 0.81587 0.04852 0.15721-0.95393 0.59948
   7   5 -11   18.32    9.97   0-0.34590 0.80651 0.06022 0.28120-0.95517 0.56059
   7   6 -13   -6.16    7.27   0-0.35768 0.81373 0.03563 0.37563-0.95238 0.48274
   7   6 -12    6.61    8.77   0-0.34439 0.80367 0.06334 0.34701-0.95547 0.52266
   7   7 -14    2.61    7.08   0-0.35117 0.80508 0.04930 0.43041-0.95402 0.44577
   8  -2 -13   -1.42   11.14   0-0.34590 0.87613 0.06022-0.19276-0.95517 0.49434
   8   0 -12   -0.81    9.79   0-0.34477 0.87470 0.06256-0.05943-0.95540 0.53098
   8   1 -12  108.41   11.59   0-0.34661 0.87722 0.05877 0.01383-0.95503 0.52876
   8   2 -12   11.56    9.98   0-0.34590 0.87275 0.06022 0.07802-0.95517 0.52943
   8   3 -13   -1.90    7.27   0-0.35415 0.88102 0.04305 0.16527-0.95330 0.48978
   8   4 -13    9.81    8.85   0-0.34489 0.86986 0.06231 0.21149-0.95538 0.49074
   8   5 -15    8.77    7.81   0-0.35601 0.87900 0.03915 0.30423-0.95283 0.41082
   8   5 -14   -6.86    9.26   0-0.34534 0.86762 0.06139 0.28210-0.95529 0.45308
   9  -1 -16    2.98   11.47   0-0.34517 0.93622 0.06173-0.12505-0.95532 0.38367
   9   0 -16    3.41    9.01   0-0.35285 0.94398 0.04578-0.04143-0.95362 0.38139
   9   1 -16    2.84    9.12   0-0.35359 0.94432 0.04422 0.02794-0.95344 0.38045
   9   2 -16    2.84    9.66   0-0.34614 0.94111 0.05974 0.08122-0.95512 0.37953
 -12  -2  -3    7.06    8.61   0-0.32821-0.51398 0.09529-0.22729-0.95775 0.79884
 -12   0  -2   -3.30    7.66   0-0.33715-0.50054 0.07733-0.07573-0.95653 0.83354
 -12   1  -2    2.84    9.17   0-0.33019-0.50418 0.09134-0.02032-0.95751 0.83384
 -12   2  -2    0.53    8.23   0-0.33301-0.50323 0.08570 0.05090-0.95715 0.83259
 -11  -5  -4    7.83    9.90   0-0.33019-0.44271 0.09134-0.42614-0.95751 0.76643
 -11  -4  -3    6.06    9.24   0-0.33213-0.43826 0.08745-0.35445-0.95727 0.80312
 -11  -3  -2    3.79    7.33   0-0.34022-0.42816 0.07110-0.27066-0.95602 0.83915
 -11   0  -1    5.41    8.00   0-0.33715-0.42925 0.07733-0.07378-0.95653 0.87526
 -11   1  -1   -2.55    9.45   0-0.33155-0.43365 0.08862-0.02028-0.95734 0.87523
 -11   2  -1    4.02    9.45   0-0.33581-0.43113 0.08006 0.05913-0.95674 0.87418
 -10  -6  -4    5.18    8.75   0-0.33028-0.36861 0.09117-0.49255-0.95750 0.77072
 -10  -5  -3    4.16    9.23   0-0.33078-0.36976 0.09017-0.42517-0.95744 0.80781
 -10  -4  -2   -5.36    6.82   0-0.33465-0.36196 0.08239-0.35251-0.95692 0.84441
 -10  -2  -1    4.12   10.41   0-0.32935-0.36721 0.09302-0.22601-0.95762 0.88222
  -9  -7  -4    2.31    7.05   0-0.33945-0.29083 0.07266-0.54541-0.95615 0.77345
  -9  -6  -3   -8.11    7.40   0-0.33638-0.29211 0.07889-0.48435-0.95665 0.81136
  -9  -5  -2   -1.47    6.43   0-0.33735-0.28942 0.07694-0.41512-0.95650 0.84868
  -9  -2   0   -5.24    7.30   0-0.34175-0.28192 0.06798-0.20364-0.95575 0.92213
  -9  -1   0    3.36    8.10   0-0.32807-0.29840 0.09558-0.16145-0.95776 0.92391
  -9   6  -1   -3.35   13.19   0-0.31633-0.31390 0.11870 0.28888-0.95875 0.88271
  -8  -8  -5    8.70    7.05   0-0.33484-0.23059 0.08200-0.62029-0.95689 0.74131
  -8  -4  -1   18.49    9.27   0-0.32785-0.22711 0.09600-0.36533-0.95779 0.89199
  -8  -3   0   42.18    7.67   0-0.34022-0.21295 0.07110-0.27356-0.95602 0.92712
  -8   1   1    5.25    6.72   0-0.33696-0.21697 0.07772-0.00804-0.95656 0.96246
  -8   8  -2    2.00    8.91   0-0.32551-0.23601 0.10066 0.44465-0.95804 0.84523
  -8   9  -3   -1.66    8.94   0-0.32707-0.23693 0.09756 0.51180-0.95787 0.80636
  -7  -9  -6    3.31    6.93   0-0.33658-0.15821 0.07850-0.68583-0.95662 0.70687
  -7  -7  -3    4.20    7.20   0-0.33907-0.15268 0.07344-0.54493-0.95622 0.81982
  -7  -6  -2   -5.88    6.97   0-0.33677-0.15021 0.07811-0.48399-0.95659 0.85695
  -7  -5  -1    6.20    7.18   0-0.33926-0.14844 0.07305-0.40965-0.95619 0.89428
  -7  -1   1   -3.82    9.34   0-0.33175-0.14892 0.08823-0.15671-0.95732 0.96794
  -7  10  -4   -1.28   10.83   0-0.33136-0.16776 0.08901 0.59141-0.95737 0.77236
  -6 -10  -8   -8.45    9.59   0-0.33029-0.09865 0.09114-0.76582-0.95750 0.63635
  -6  -9  -6    5.06    8.77   0-0.33116-0.09715 0.08939-0.69538-0.95739 0.71226
  -6  -8  -4   -2.35    6.99   0-0.33945-0.08183 0.07266-0.61334-0.95615 0.78578
  -6  -7  -3    2.06    6.88   0-0.33291-0.08636 0.08589-0.55903-0.95716 0.82399
  -6  -6  -2   47.35   10.12   0-0.33039-0.08785 0.09095-0.49616-0.95749 0.86237
  -6  -5  -1   20.50    9.38   0-0.33144-0.08571 0.08884-0.42504-0.95736 0.89906
  -6  -4   0   93.58    7.91   0-0.34060-0.07378 0.07032-0.34008-0.95596 0.93523
  -6  -2   1   96.95    8.47   0-0.33984-0.07298 0.07188-0.20590-0.95609 0.97222
  -5 -10  -7    6.41    7.23   0-0.34232-0.01852 0.06682-0.74052-0.95564 0.67717
  -5  -9  -6   20.59    8.66   0-0.32917-0.02952 0.09339-0.70131-0.95764 0.71652
  -5  -8  -4  -10.65    6.64   0-0.33696-0.01478 0.07772-0.61828-0.95656 0.79001
  -5  -7  -3    7.45    9.57   0-0.33039-0.02249 0.09095-0.56328-0.95749 0.82908
  -5  -5  -1  172.12   11.60   0-0.32996-0.01710 0.09181-0.42959-0.95754 0.90481
  -5  -4   0  435.69   10.86   0-0.33754-0.00811 0.07655-0.34614-0.95647 0.93970
  -5  -2   1  657.99   13.80   0-0.33561-0.00873 0.08045-0.21464-0.95677 0.97677
  -5  11  -5   -1.25    9.88   0-0.33107-0.03137 0.08959 0.65908-0.95740 0.74176
  -4 -10  -7   -8.22    6.94   0-0.34308 0.05472 0.06526-0.73992-0.95550 0.68021
  -4  -9  -6   -7.30    8.85   0-0.32961 0.04303 0.09250-0.70191-0.95759 0.71955
  -4  -8  -4   42.49    7.39   0-0.33792 0.05503 0.07578-0.61485-0.95641 0.79497
  -4  -7  -3   -7.76   10.45   0-0.33058 0.05066 0.09056-0.56358-0.95747 0.83189
  -4  -5  -1  266.61   11.66   0-0.33018 0.05200 0.09136-0.42875-0.95752 0.90784
  -4  -4   0   11.30    7.75   0-0.33984 0.06261 0.07188-0.34188-0.95609 0.94322
  -4  -2   1   15.07    9.11   0-0.33888 0.06361 0.07383-0.20795-0.95625 0.98022
  -4  11  -5    0.60   10.09   0-0.33087 0.03818 0.08998 0.65847-0.95743 0.74570
  -3 -10  -8    1.71   10.10   0-0.33039 0.10970 0.09095-0.76499-0.95749 0.64801
  -3  -9  -6    3.91    6.95   0-0.33233 0.11244 0.08706-0.69386-0.95724 0.72388
  -3  -8  -4   11.23    6.79   0-0.34289 0.12709 0.06565-0.60594-0.95554 0.79766
  -3  -7  -3   -1.59    7.20   0-0.33600 0.12501 0.07967-0.55304-0.95671 0.83532
  -3  -6  -2   -5.87    7.84   0-0.33330 0.12421 0.08512-0.49114-0.95711 0.87300
  -3  -5  -1  177.28    8.45   0-0.33658 0.12726 0.07850-0.41583-0.95662 0.91062
  -3   6   0  119.17   11.52   0-0.33188 0.12144 0.08795 0.31936-0.95730 0.94170
  -3  10  -4   12.96    7.28   0-0.33831 0.11956 0.07500 0.60589-0.95635 0.78544
  -3  11  -5    0.97    9.00   0-0.33019 0.10994 0.09134 0.65298-0.95751 0.74730
  -2 -11 -10   -3.30    7.45   0-0.34156 0.18559 0.06837-0.80977-0.95578 0.57527
  -2 -10  -8    5.66    7.01   0-0.33754 0.18299 0.07655-0.75112-0.95647 0.65190
  -2  -9  -6   12.42    7.07   0-0.34022 0.18981 0.07110-0.67848-0.95602 0.72669
  -2  -3   0 1343.43   19.27   0-0.33561 0.19655 0.08045-0.28236-0.95677 0.95153
  -2   0   1    0.71   13.65   0-0.33407 0.19718 0.08356-0.08340-0.95700 0.98719
  -2   7  -1   54.43    9.14   0-0.33223 0.18865 0.08726 0.38847-0.95725 0.90682
  -2   8  -2   83.69    7.76   0-0.33792 0.19258 0.07578 0.46709-0.95641 0.86727
  -2   9  -3    2.80    7.26   0-0.33619 0.18928 0.07928 0.53276-0.95668 0.82825
  -2  10  -4   61.39    9.97   0-0.33024 0.18110 0.09125 0.58740-0.95751 0.79120
  -2  11  -6   16.96    6.85   0-0.34060 0.18690 0.07032 0.67864-0.95596 0.71209
  -1 -11 -11   -0.92    7.24   0-0.33735 0.24853 0.07694-0.81767-0.95650 0.54198
  -1 -10  -9   -7.75    9.68   0-0.33097 0.24377 0.08978-0.76414-0.95742 0.61873
  -1  -9  -7   -3.96    9.69   0-0.33019 0.24756 0.09134-0.69725-0.95751 0.69347
  -1  -8  -5   11.98    7.00   0-0.34060 0.26168 0.07032-0.61061-0.95596 0.76784
  -1  -7  -4   23.87    9.85   0-0.33131 0.25464 0.08910-0.56202-0.95737 0.80629
  -1  -4  -1  590.62   13.75   0-0.33888 0.26735 0.07383-0.34358-0.95625 0.91764
  -1  -2   0   80.14   13.29   0-0.33330 0.26315 0.08512-0.21882-0.95711 0.95528
  -1  10  -5    1.47    6.75   0-0.34079 0.25765 0.06993 0.60941-0.95592 0.75615
  -1  11  -6   -5.25   10.49   0-0.33058 0.24629 0.09056 0.65749-0.95747 0.71727
   0 -10 -10    2.41    8.40   0-0.32932 0.31242 0.09309-0.76872-0.95762 0.58394
   0  -8  -6    9.21    6.93   0-0.33310 0.32153 0.08551-0.62567-0.95713 0.73493
   0  -3  -1    3.05   12.42   0-0.33888 0.33722 0.07383-0.27684-0.95625 0.92042
   0   2   0   18.49   13.57   0-0.34175 0.33998 0.06798 0.06852-0.95575 0.95470
   0   5  -1    5.99    8.09   0-0.34327 0.34029 0.06487 0.27458-0.95546 0.91382
   0   7  -2   44.26   10.24   0-0.33055 0.32411 0.09062 0.38513-0.95747 0.87644
   0   8  -3   58.98    7.61   0-0.33446 0.32533 0.08278 0.46086-0.95694 0.83730
   0   9  -4   -0.31    8.70   0-0.33019 0.32015 0.09134 0.52454-0.95751 0.79953
   0  11  -7    3.80    7.30   0-0.33484 0.31798 0.08200 0.66683-0.95689 0.68287
   1 -10 -11    4.10    9.31   0-0.33030 0.37802 0.09113-0.76550-0.95750 0.55063
   1  -8  -7   -2.25    9.95   0-0.33039 0.38856 0.09095-0.63015-0.95749 0.70056
   1   6  -2   30.42   10.37   0-0.32973 0.39314 0.09226 0.31460-0.95757 0.88095
   1   7  -3  110.67    7.85   0-0.33773 0.39797 0.07616 0.39975-0.95644 0.84200
   1   8  -4   70.02    7.69   0-0.33926 0.39784 0.07305 0.47118-0.95619 0.80268
   1   9  -5   24.56    7.48   0-0.33600 0.39354 0.07967 0.53195-0.95671 0.76429
   1  10  -6   -0.19    9.76   0-0.33019 0.38457 0.09134 0.58736-0.95751 0.72551
   1  11  -8   15.25    7.71   0-0.33542 0.38589 0.08084 0.66808-0.95680 0.64869
   2 -10 -12    0.71    7.07   0-0.33715 0.45401 0.07733-0.75009-0.95653 0.51547
   2  -9 -10    8.52   10.04   0-0.33065 0.44970 0.09043-0.69710-0.95746 0.59164
   2  -8  -8   50.45    7.85   0-0.33407 0.45781 0.08356-0.62502-0.95700 0.66474
   2   4  -2  125.27    9.74   0-0.33426 0.46647 0.08317 0.18905-0.95697 0.88660
   2   6  -3   -8.75    7.07   0-0.33233 0.46338 0.08706 0.31952-0.95724 0.84736
   2   7  -4   69.49    7.93   0-0.33907 0.46669 0.07344 0.40275-0.95622 0.80741
   2   8  -5   37.01    7.41   0-0.33907 0.46543 0.07344 0.47010-0.95622 0.76907
   2   9  -6   14.27    6.91   0-0.33523 0.45975 0.08122 0.53082-0.95683 0.73005
   2  11  -9    2.44    9.13   0-0.33126 0.44811 0.08920 0.66195-0.95738 0.61667
   3   4  -3 1193.53   17.00   0-0.33194 0.53125 0.08784 0.18480-0.95729 0.85300
   3   6  -4   86.66   11.17   0-0.33019 0.52686 0.09134 0.31664-0.95751 0.81313
   3   7  -5    3.54    7.32   0-0.33484 0.53146 0.08200 0.39394-0.95689 0.77358
   3   8  -6   -4.00    7.12   0-0.33446 0.52793 0.08278 0.46091-0.95694 0.73599
   3   9  -7   29.96    9.53   0-0.33039 0.52137 0.09095 0.52147-0.95749 0.69698
   3  10  -9    2.78    7.13   0-0.33773 0.52407 0.07616 0.60463-0.95644 0.62037
   4  -8 -11    2.66    7.07   0-0.33773 0.59335 0.07616-0.61535-0.95644 0.55987
   4  -6  -8    9.56    9.70   0-0.32973 0.59165 0.09227-0.49715-0.95757 0.67336
   4   3  -4  163.60   10.04   0-0.33523 0.60233 0.08122 0.12368-0.95683 0.81955
   4   5  -5   79.12    8.78   0-0.33984 0.60476 0.07188 0.26903-0.95609 0.77885
   4   9  -9    2.90    7.07   0-0.33773 0.59375 0.07616 0.53652-0.95644 0.62483
   4  10 -11    7.52    7.63   0-0.34117 0.59373 0.06915 0.61219-0.95585 0.54619
   4  10 -10   -6.01    8.87   0-0.32932 0.58161 0.09309 0.58622-0.95762 0.58777
   5   4  -6   -2.04    6.90   0-0.34022 0.67354 0.07110 0.20127-0.95602 0.74518
   5   6  -7   10.87    7.15   0-0.33291 0.66420 0.08589 0.32232-0.95716 0.70635
   5   7  -8   21.86    7.30   0-0.33426 0.66350 0.08317 0.39367-0.95697 0.66708
   5   8  -9   22.19   10.39   0-0.33136 0.65787 0.08901 0.45493-0.95737 0.62989
   5   9 -11   -0.27    7.27   0-0.33850 0.65951 0.07461 0.53880-0.95632 0.55263
   6  -7 -14    2.93   10.73   0-0.32735 0.71599 0.09701-0.56809-0.95784 0.45422
   6  -6 -12   -3.03   11.01   0-0.32971 0.72312 0.09231-0.49418-0.95757 0.52975
   6   0  -7   -3.77   10.90   0-0.33116 0.73370 0.08939-0.08710-0.95739 0.71512
   6   1  -7    7.16    7.51   0-0.33811 0.73992 0.07539-0.00642-0.95638 0.71316
   6   2  -7   -1.98    7.08   0-0.33561 0.73677 0.08045 0.05703-0.95677 0.71318
   6   3  -7   45.60    9.82   0-0.33007 0.72941 0.09159 0.11340-0.95753 0.71288
   6   5  -8   31.03   10.24   0-0.33057 0.72864 0.09057 0.25045-0.95747 0.67383
   6   6  -9   -0.86    6.99   0-0.33484 0.73045 0.08200 0.32712-0.95689 0.63492
   6   7 -10   12.02    7.91   0-0.33407 0.72828 0.08356 0.39344-0.95700 0.59538
   6   8 -12  -15.05    7.40   0-0.34251 0.73099 0.06643 0.47956-0.95561 0.51849
   6   8 -11    7.53   10.20   0-0.32993 0.72114 0.09187 0.45308-0.95755 0.55708
   7  -6 -15    0.46   12.29   0-0.32940 0.78662 0.09291-0.49733-0.95761 0.41788
   7   0  -9   56.42   10.60   0-0.33019 0.79702 0.09134-0.08798-0.95751 0.64252
   7   1  -9   -1.49    7.13   0-0.33484 0.80147 0.08200-0.01128-0.95689 0.64208
   7   2  -9   76.51    9.70   0-0.33310 0.79949 0.08551 0.05358-0.95713 0.64138
   7   4 -10    3.14    7.03   0-0.33984 0.80407 0.07188 0.20144-0.95609 0.60058
   7   6 -11    9.14    9.39   0-0.32984 0.79067 0.09204 0.31713-0.95756 0.56245
   7   7 -13   17.05    7.19   0-0.33984 0.79712 0.07188 0.40610-0.95609 0.48439
   8  -1 -12   67.91   13.17   0-0.33155 0.86276 0.08862-0.15283-0.95734 0.53200
   8   3 -12    0.69    6.99   0-0.33638 0.86502 0.07889 0.12851-0.95665 0.53069
   8   5 -13   12.84   10.25   0-0.33052 0.85791 0.09068 0.25181-0.95747 0.49115
   8   6 -14    9.25   10.34   0-0.32974 0.85436 0.09225 0.31860-0.95757 0.45247
   9  -2 -16    5.64   10.95   0-0.32302 0.91311 0.10557-0.23681-0.95827 0.38703
   9   0 -15   -0.55   11.33   0-0.33213 0.92537 0.08745-0.08392-0.95727 0.42248
   9   1 -15    1.12    8.26   0-0.33600 0.92871 0.07967-0.00612-0.95671 0.42236
   9   2 -15   -3.62    7.98   0-0.33426 0.92657 0.08317 0.05808-0.95697 0.42192
   9   3 -15   -4.48    9.56   0-0.32961 0.92056 0.09250 0.11653-0.95759 0.42175
 -12  -1  -3   -1.26   10.26   0-0.31327-0.52629 0.12379-0.19034-0.95899 0.79929
 -11  -3  -3    0.62    9.65   0-0.31347-0.45514 0.12341-0.32598-0.95898 0.80430
 -11  -2  -2   -5.03    7.36   0-0.32416-0.44241 0.10248-0.23721-0.95825 0.84055
 -10  -6  -5   11.30    8.78   0-0.31327-0.39245 0.12379-0.52790-0.95899 0.73420
 -10  -3  -2   -1.78    9.61   0-0.31407-0.38297 0.12224-0.32228-0.95896 0.84550
 -10  -1  -1    1.31   10.60   0-0.31407-0.38316 0.12224-0.18729-0.95896 0.88308
  -9  -7  -5   -1.16    6.66   0-0.32082-0.31084 0.10907-0.58201-0.95854 0.73768
  -9  -6  -4    0.04   10.18   0-0.31447-0.31475 0.12147-0.52666-0.95894 0.77518
  -9  -5  -3   -2.44    8.09   0-0.31327-0.31602 0.12379-0.46289-0.95899 0.81304
  -9  -4  -2    4.01    9.48   0-0.31467-0.31371 0.12108-0.38929-0.95893 0.85039
  -9  -3  -1   13.54    7.35   0-0.32338-0.30308 0.10403-0.30479-0.95832 0.88708
  -9   0   0    3.20    9.23   0-0.31319-0.31217 0.12394-0.12173-0.95900 0.92419
  -8  -8  -6   -7.57    6.85   0-0.31745-0.24630 0.11566-0.65582-0.95877 0.70432
  -8  -7  -4   -6.85    7.11   0-0.32730-0.23265 0.09627-0.56964-0.95793 0.77899
  -8  -6  -3   -1.58    7.31   0-0.32279-0.23527 0.10520-0.51105-0.95837 0.81673
  -8  -5  -2   13.18    6.46   0-0.32239-0.23632 0.10597-0.44225-0.95841 0.85448
  -8  -2   0   74.72    8.11   0-0.32042-0.23234 0.10985-0.24441-0.95857 0.92905
  -8   7  -1   -0.05    9.54   0-0.31407-0.24444 0.12224 0.35465-0.95896 0.88409
  -7  -9  -7   -0.52    6.80   0-0.32101-0.17523 0.10869-0.71651-0.95852 0.67073
  -7  -8  -5   -3.76    6.92   0-0.32573-0.16636 0.09937-0.63988-0.95809 0.74553
  -7  -7  -4   13.59    7.03   0-0.31745-0.17580 0.11566-0.58727-0.95877 0.78427
  -7  -6  -3   -4.66    8.98   0-0.31307-0.17682 0.12418-0.53188-0.95900 0.82175
  -7  -4  -1  140.00   10.44   0-0.31447-0.17055 0.12147-0.39125-0.95894 0.89691
  -7  -3   0    0.57    6.56   0-0.32593-0.15732 0.09899-0.30280-0.95807 0.93244
  -7   0   1  120.69   11.49   0-0.31675-0.16574 0.11703-0.11536-0.95882 0.96957
  -7   6   0    3.00    9.78   0-0.31494-0.17273 0.12055 0.28865-0.95892 0.92781
  -6  -9  -7    5.89    9.84   0-0.31443-0.11499 0.12154-0.72755-0.95894 0.67557
  -6  -8  -5    1.86    7.23   0-0.31943-0.10320 0.11179-0.65233-0.95864 0.75001
  -6  -3   0   80.31   10.05   0-0.31562-0.09937 0.11924-0.32126-0.95888 0.93772
  -6  -1   1   -1.38    7.39   0-0.31884-0.09372 0.11295-0.18180-0.95868 0.97374
  -6   8  -1   -4.89    8.22   0-0.31167-0.10871 0.12689 0.41398-0.95906 0.89226
  -6   9  -2   17.57   10.06   0-0.31335-0.10936 0.12364 0.48912-0.95899 0.85314
  -5 -10  -9    5.22   10.19   0-0.31382-0.05073 0.12272-0.79773-0.95897 0.60472
  -5 -10  -8    0.96    7.30   0-0.32730-0.03184 0.09627-0.77114-0.95793 0.64055
  -5  -8  -5    1.53    8.03   0-0.31606-0.04021 0.11837-0.65796-0.95886 0.75490
  -5  -6  -2   37.21    7.23   0-0.32671-0.02220 0.09743-0.50173-0.95799 0.86701
  -5   8  -1   12.70    8.33   0-0.31565-0.03609 0.11916 0.42662-0.95888 0.89603
  -5   9  -2    2.02    7.39   0-0.31923-0.03399 0.11217 0.50065-0.95865 0.85676
  -5  10  -3   -2.41   10.14   0-0.31437-0.04309 0.12166 0.55770-0.95894 0.81972
  -4 -10  -9    3.19    9.05   0-0.31397 0.01799 0.12243-0.80002-0.95896 0.60775
  -4 -10  -8  -13.82    7.27   0-0.32730 0.03754 0.09627-0.77109-0.95793 0.64450
  -4  -8  -5   -4.97    8.60   0-0.31407 0.02890 0.12224-0.65882-0.95896 0.75876
  -4  -6  -2    7.34    7.41   0-0.32749 0.04668 0.09588-0.50108-0.95790 0.87042
  -4   8  -1   30.32    8.74   0-0.31705 0.03547 0.11644 0.42635-0.95880 0.90009
  -4   9  -2   86.90    8.76   0-0.31963 0.03627 0.11140 0.49928-0.95863 0.86128
  -4  10  -3   -0.52    9.89   0-0.31526 0.02921 0.11992 0.56075-0.95890 0.82213
  -3 -10  -9    7.41    9.91   0-0.31479 0.08936 0.12084-0.79511-0.95892 0.61218
  -3  -9  -7    4.29    9.19   0-0.31338 0.09216 0.12358-0.73118-0.95899 0.68760
  -3  -8  -5    6.18    7.13   0-0.31923 0.10188 0.11217-0.65214-0.95865 0.76249
  -3  -3   0  958.19   15.70   0-0.31685 0.10879 0.11682-0.31861-0.95881 0.94949
  -3  -1   1 1923.97   26.24   0-0.32436 0.11797 0.10209-0.16819-0.95823 0.98544
  -3   4   1   34.84    8.90   0-0.32456 0.11700 0.10170 0.16947-0.95821 0.98179
  -3   8  -1   60.04    9.96   0-0.31144 0.09858 0.12733 0.41575-0.95906 0.90390
  -3   9  -2    8.89   10.11   0-0.31467 0.10041 0.12108 0.49081-0.95893 0.86462
  -3  10  -3    2.56    9.09   0-0.31127 0.09426 0.12766 0.55256-0.95907 0.82637
  -2 -10  -9   -0.05    7.32   0-0.32082 0.16760 0.10907-0.78364-0.95854 0.61515
  -2  -9  -7   -0.93    6.61   0-0.32003 0.17086 0.11062-0.71844-0.95860 0.69053
  -2  -8  -5    7.00    6.96   0-0.32710 0.17918 0.09666-0.63673-0.95795 0.76566
  -2  -7  -4    3.78    7.32   0-0.31685 0.17085 0.11682-0.58973-0.95881 0.80392
  -2  -4  -1  656.50   15.82   0-0.31465 0.17419 0.12110-0.39077-0.95893 0.91631
  -2   3   1  849.37   20.71   0-0.31923 0.18078 0.11217 0.09186-0.95865 0.98681
  -2   6   0  109.84   11.35   0-0.31504 0.17382 0.12035 0.28710-0.95891 0.94719
  -2  11  -5   16.73    6.86   0-0.31983 0.16823 0.11101 0.63780-0.95861 0.75300
  -1 -10 -10   -0.04    9.54   0-0.31417 0.22824 0.12205-0.79604-0.95895 0.58148
  -1  -8  -6  127.32   10.78   0-0.31517 0.23579 0.12011-0.66085-0.95890 0.73191
  -1  -6  -3    7.61    7.12   0-0.32632 0.25169 0.09821-0.50416-0.95803 0.84444
  -1  -5  -2   19.19    7.78   0-0.32710 0.25425 0.09666-0.43436-0.95795 0.88174
  -1   5   0   13.20    8.61   0-0.31963 0.24884 0.11140 0.22761-0.95863 0.95139
  -1   7  -1   17.84    9.30   0-0.31422 0.24135 0.12195 0.35244-0.95895 0.91243
  -1   8  -2    1.51    6.79   0-0.32161 0.24566 0.10752 0.43491-0.95847 0.87396
  -1   9  -3   26.52    7.28   0-0.32220 0.24395 0.10636 0.50592-0.95842 0.83418
  -1  10  -4   -0.22    6.64   0-0.31785 0.23670 0.11489 0.56396-0.95875 0.79698
  -1  12  -7    6.70    9.09   0-0.31646 0.22990 0.11760 0.69970-0.95883 0.68047
   0 -10 -11   -4.07    8.52   0-0.31287 0.29430 0.12457-0.80054-0.95901 0.54721
   0  -9  -8    3.38    7.33   0-0.32573 0.31047 0.09937-0.70668-0.95809 0.66038
   0  -7  -5  157.52    8.10   0-0.32042 0.31182 0.10985-0.58313-0.95857 0.77307
   0  -4  -2    0.52   13.14   0-0.31397 0.31264 0.12244-0.39336-0.95896 0.88514
   0   3   0    5.21   10.77   0-0.32436 0.32380 0.10209 0.10162-0.95823 0.95617
   0   6  -1  123.17    8.49   0-0.31725 0.31230 0.11605 0.29183-0.95879 0.91687
   0  10  -5   17.84    6.89   0-0.32554 0.31338 0.09976 0.58084-0.95811 0.76104
   0  11  -6    7.67    9.27   0-0.31646 0.30167 0.11760 0.63121-0.95883 0.72312
   1 -10 -12    5.96   10.07   0-0.31347 0.35960 0.12341-0.79754-0.95898 0.51374
   1  -9  -9   12.19    7.19   0-0.32554 0.37768 0.09976-0.70728-0.95811 0.62639
   1  -7  -6   30.09    9.29   0-0.31465 0.37294 0.12111-0.59420-0.95893 0.73938
   1  -3  -2  389.49   17.62   0-0.31258 0.37713 0.12512-0.32732-0.95902 0.88990
   1   4  -1  151.11   10.56   0-0.32710 0.39158 0.09666 0.17608-0.95795 0.92165
   1   8  -3   10.89    9.16   0-0.31407 0.37461 0.12224 0.41783-0.95896 0.84259
   1   9  -4    1.09    8.70   0-0.31317 0.37085 0.12399 0.48537-0.95900 0.80569
   1  11  -7    1.14    7.57   0-0.31884 0.36987 0.11295 0.63508-0.95868 0.69030
   2 -10 -13    0.06    7.53   0-0.32062 0.43584 0.10946-0.78217-0.95855 0.47942
   2  -7  -7   55.80    9.88   0-0.31532 0.44059 0.11980-0.59292-0.95890 0.70491
   2   5  -2   69.88   10.94   0-0.31546 0.44736 0.11953 0.22048-0.95889 0.88788
   2   8  -4   14.18   10.34   0-0.31437 0.44324 0.12165 0.42236-0.95894 0.80926
   2   9  -5   86.54   10.47   0-0.31407 0.43947 0.12224 0.48967-0.95896 0.77066
   2  10  -7    1.58    7.07   0-0.32730 0.44818 0.09627 0.58366-0.95793 0.69403
   2  11  -8   10.72    7.85   0-0.31725 0.43708 0.11605 0.63284-0.95879 0.65484
   3  -9 -12   -0.87    7.68   0-0.32161 0.50809 0.10752-0.71298-0.95847 0.52065
   3  -8 -10    9.73    9.32   0-0.31603 0.50421 0.11843-0.65702-0.95886 0.59641
   3  -7  -8   18.63    7.11   0-0.32554 0.51840 0.09976-0.57322-0.95811 0.66996
   3   5  -3  201.79   11.53   0-0.31502 0.51427 0.12040 0.21987-0.95891 0.85384
   3   8  -5   82.41    9.45   0-0.31374 0.50793 0.12288 0.42020-0.95897 0.77410
   3  10  -8   10.40    7.13   0-0.32220 0.51174 0.10636 0.57454-0.95842 0.65916
   3  11 -10   -0.43    7.28   0-0.32573 0.50929 0.09937 0.64970-0.95809 0.58356
   3  11  -9   -1.04    9.00   0-0.31317 0.49773 0.12399 0.62271-0.95900 0.62273
   4  -9 -14    1.72    7.95   0-0.32239 0.57391 0.10597-0.71078-0.95841 0.44880
   4  -8 -12    8.93    9.41   0-0.31027 0.56425 0.12959-0.66887-0.95910 0.52421
   4  -7 -10   56.62    9.66   0-0.31003 0.56819 0.13005-0.60394-0.95911 0.59806
   4  -5  -7   66.11   11.36   0-0.31441 0.57742 0.12158-0.45991-0.95894 0.71185
   4  -4  -6   39.36   10.97   0-0.31097 0.57569 0.12824-0.39987-0.95908 0.74947
   4  -1  -4   -0.89   12.76   0-0.31447 0.58455 0.12147-0.18823-0.95894 0.82312
   4   4  -4    5.44    7.91   0-0.32239 0.59095 0.10597 0.16592-0.95841 0.81928
   4   6  -5   -4.28    7.64   0-0.32121 0.58647 0.10830 0.29919-0.95851 0.78062
   4   7  -6   12.83    7.50   0-0.32632 0.58993 0.09821 0.37785-0.95803 0.74073
   4   8  -7   10.22    6.82   0-0.32573 0.58721 0.09937 0.44513-0.95809 0.70216
   4   9  -8   30.26    7.50   0-0.32141 0.58049 0.10791 0.50433-0.95849 0.66424
   4  10  -9   16.05    9.76   0-0.31433 0.57070 0.12173 0.55875-0.95894 0.62543
   5  -8 -14   -1.96   10.72   0-0.31526 0.63519 0.11992-0.65614-0.95890 0.45251
   5  -6 -10   17.69   11.54   0-0.31500 0.64129 0.12044-0.52478-0.95891 0.60218
   5   0  -5   24.10   10.94   0-0.31407 0.64888 0.12224-0.12061-0.95896 0.78805
   5   1  -5    2.29    7.84   0-0.32279 0.65927 0.10520-0.03674-0.95837 0.78729
   5   2  -5   21.80    7.74   0-0.32318 0.65888 0.10442 0.03261-0.95834 0.78690
   5   3  -5  421.20   11.02   0-0.31725 0.65185 0.11605 0.08910-0.95879 0.78732
   5   5  -6   -6.88    7.15   0-0.32475 0.65777 0.10131 0.23900-0.95819 0.74693
   5   7  -7   29.98   10.11   0-0.31427 0.64438 0.12186 0.35407-0.95895 0.70820
   5   8  -8    0.82    9.99   0-0.31367 0.64222 0.12302 0.42214-0.95898 0.66916
   5   9 -10   -0.28    6.73   0-0.32475 0.64777 0.10131 0.51178-0.95819 0.59267
   6   4  -7    1.26    6.93   0-0.31824 0.71870 0.11411 0.15882-0.95872 0.71403
   6   6  -8    2.68    9.68   0-0.31407 0.71312 0.12224 0.28721-0.95896 0.67455
   6   7  -9    8.96    6.99   0-0.31685 0.71321 0.11682 0.36006-0.95881 0.63542
   6   8 -10   17.89   10.25   0-0.31446 0.70854 0.12147 0.42395-0.95894 0.59693
   6   9 -12    3.89    7.38   0-0.32161 0.71108 0.10752 0.50611-0.95847 0.51961
   7  -1  -9    4.14    8.90   0-0.31158 0.77630 0.12706-0.19282-0.95906 0.64555
   7   3  -9    7.90    7.14   0-0.32691 0.79321 0.09704 0.10807-0.95797 0.64128
   7   4  -9   44.94    7.86   0-0.31765 0.78316 0.11527 0.15831-0.95876 0.64205
   7   5 -10   -1.97    7.23   0-0.32652 0.78956 0.09782 0.24415-0.95801 0.60283
   7   6 -10    3.53    8.39   0-0.31407 0.77479 0.12224 0.28469-0.95896 0.60289
   7   7 -12   -9.06    7.73   0-0.32671 0.78506 0.09743 0.38108-0.95799 0.52569
   7   7 -11   -0.19    9.41   0-0.31347 0.77221 0.12341 0.35355-0.95898 0.56511
   8   0 -11    0.76    9.28   0-0.31227 0.84220 0.12573-0.12172-0.95903 0.57357
   8   1 -11    0.47    7.47   0-0.31884 0.85035 0.11295-0.04139-0.95868 0.57213
   8   2 -11   19.77    7.73   0-0.31943 0.85117 0.11179 0.02594-0.95864 0.57080
   8   3 -11    9.70    9.74   0-0.31526 0.84691 0.11992 0.08573-0.95890 0.57014
   8   4 -12    2.24    7.34   0-0.32652 0.85509 0.09782 0.17738-0.95801 0.53157
   8   5 -12   16.77    9.96   0-0.31512 0.84442 0.12020 0.22165-0.95891 0.53076
   8   6 -13   11.85    7.48   0-0.31685 0.84353 0.11682 0.29306-0.95881 0.49190
   9  -1 -15    0.38    9.67   0-0.31805 0.91129 0.11450-0.17894-0.95874 0.42471
   9   1 -14    4.79   10.89   0-0.31566 0.91075 0.11915-0.04830-0.95888 0.46144
   9   2 -14    4.43    9.27   0-0.31485 0.91210 0.12072 0.01854-0.95892 0.45978
   9   3 -14   11.61    9.57   0-0.31398 0.90766 0.12241 0.08398-0.95896 0.46004
 -12   0  -3    6.79   11.16   0-0.29794-0.54035 0.15177-0.14761-0.95902 0.79801
 -11  -4  -4    1.64    7.32   0-0.30828-0.46168 0.13212-0.40184-0.95904 0.76665
 -11  -1  -2    6.04    7.65   0-0.30828-0.45937 0.13212-0.19616-0.95904 0.84078
 -11   0  -2    2.27    8.46   0-0.29445-0.47321 0.15832-0.15513-0.95890 0.84057
 -10  -5  -4    2.41    6.87   0-0.30788-0.39182 0.13289-0.47050-0.95905 0.77097
 -10  -4  -3    5.40    6.64   0-0.30828-0.39156 0.13212-0.39968-0.95904 0.80862
 -10  -2  -2   -1.75    8.54   0-0.29732-0.40506 0.15294-0.28638-0.95900 0.84646
 -10   0  -1    6.80   10.05   0-0.29718-0.39873 0.15321-0.15037-0.95900 0.88215
  -9  -7  -6   -9.38    6.90   0-0.30242-0.33111 0.14331-0.61581-0.95908 0.69989
  -9  -2  -1   69.28    8.02   0-0.30221-0.32188 0.14370-0.27776-0.95908 0.88791
  -9   1   0    1.23    9.94   0-0.29904-0.32553 0.14970-0.07945-0.95904 0.92319
  -9   2   0    0.37    9.28   0-0.29199-0.33289 0.16293-0.02509-0.95879 0.92281
  -9   3   0   41.67   10.91   0-0.29576-0.32732 0.15587 0.04757-0.95895 0.92365
  -8  -8  -7   -1.65    7.14   0-0.30059-0.26515 0.14678-0.68665-0.95907 0.66626
  -8  -7  -5    6.94    7.11   0-0.30707-0.25753 0.13444-0.60533-0.95906 0.74230
  -8  -6  -4    2.71    7.36   0-0.29977-0.26042 0.14832-0.55400-0.95905 0.77929
  -8  -5  -3    2.43    8.50   0-0.29589-0.26442 0.15563-0.49222-0.95896 0.81714
  -8  -4  -2    9.95    9.57   0-0.29650-0.26193 0.15448-0.42352-0.95898 0.85456
  -8  -3  -1   12.12    7.42   0-0.30343-0.25206 0.14138-0.34247-0.95909 0.89234
  -8  -1   0   20.49    9.59   0-0.29936-0.25371 0.14909-0.21601-0.95905 0.92896
  -7  -9  -8  -12.08    7.13   0-0.30545-0.19271 0.13753-0.74494-0.95908 0.63279
  -7  -8  -6    0.08    6.59   0-0.30727-0.18688 0.13405-0.67439-0.95906 0.70818
  -7  -7  -5    7.86    9.73   0-0.29706-0.19877 0.15343-0.62603-0.95899 0.74677
  -7  -5  -2   14.08    6.68   0-0.30989-0.17944 0.12903-0.46574-0.95900 0.85898
  -7  -2   0    5.52    6.55   0-0.30140-0.18412 0.14524-0.27898-0.95908 0.93303
  -7   1   1   -0.62    9.26   0-0.29936-0.18206 0.14909-0.08238-0.95905 0.96883
  -7   2   1  182.11   13.41   0-0.29273-0.19026 0.16154-0.02475-0.95883 0.96948
  -7   3   1   36.22   12.93   0-0.29533-0.18709 0.15668 0.04737-0.95894 0.96885
  -7   9  -2    2.87    9.87   0-0.29679-0.19524 0.15394 0.45952-0.95899 0.85049
  -7  10  -3    6.72   10.54   0-0.29494-0.19922 0.15742 0.52388-0.95892 0.81155
  -6  -9  -8    3.45    8.48   0-0.29834-0.13338 0.15102-0.75705-0.95903 0.63733
  -6  -8  -6   13.92    6.90   0-0.29997-0.12776 0.14794-0.68698-0.95906 0.71278
  -6  -7  -4   12.88    6.98   0-0.30969-0.11407 0.12942-0.60145-0.95900 0.78815
  -6  -6  -3   10.31    7.66   0-0.30282-0.11884 0.14254-0.54679-0.95909 0.82544
  -6  -5  -2    8.10    7.13   0-0.30018-0.11951 0.14755-0.48428-0.95906 0.86275
  -6  -4  -1   55.49    7.40   0-0.30343-0.11297 0.14138-0.41102-0.95909 0.90034
  -6   0   1    6.16   10.75   0-0.29713-0.11825 0.15330-0.15214-0.95899 0.97441
  -6  10  -3    4.20    7.31   0-0.30808-0.11669 0.13251 0.54888-0.95904 0.81531
  -5 -10 -10    8.41    8.82   0-0.29896-0.06740 0.14986-0.82330-0.95904 0.56589
  -5  -9  -7    2.42    6.89   0-0.31049-0.04665 0.12787-0.73559-0.95898 0.67849
  -5  -8  -6   -5.27    8.02   0-0.29640-0.05953 0.15467-0.69723-0.95897 0.71590
  -5  -7  -4    8.08    6.75   0-0.30505-0.04912 0.13830-0.61026-0.95908 0.79196
  -5  -6  -3   16.71    9.99   0-0.29773-0.05369 0.15217-0.55721-0.95901 0.82914
  -5  -4  -1    2.11    9.97   0-0.29732-0.05127 0.15294-0.42276-0.95900 0.90416
  -5  -3   0  181.54    9.61   0-0.30908-0.03660 0.13058-0.33226-0.95902 0.94184
  -5  -1   1   30.23    8.90   0-0.30989-0.03348 0.12903-0.19496-0.95900 0.97852
  -5   5   1    6.03    9.80   0-0.29915-0.04691 0.14950 0.19094-0.95904 0.97466
  -5   7   0   25.64    8.51   0-0.30181-0.04683 0.14447 0.33085-0.95908 0.93555
  -5  11  -4    1.35    6.85   0-0.30505-0.05465 0.13830 0.60911-0.95908 0.78166
  -4 -10 -10   20.91    9.97   0-0.29741 0.00099 0.15278-0.82644-0.95900 0.56950
  -4  -9  -7   11.24    7.12   0-0.30989 0.01909 0.12903-0.73612-0.95900 0.68315
  -4  -7  -4    5.14    7.20   0-0.30424 0.01948 0.13984-0.61206-0.95909 0.79586
  -4  -6  -3    2.16    9.96   0-0.29732 0.01406 0.15294-0.55879-0.95900 0.83363
  -4  -4  -1  329.25   12.70   0-0.29696 0.01870 0.15362-0.42346-0.95899 0.90909
  -4  -3   0  349.02   10.90   0-0.30868 0.03176 0.13135-0.33303-0.95903 0.94563
  -4  -1   1   26.52    9.49   0-0.30989 0.03515 0.12903-0.19483-0.95900 0.98235
  -4   5   1  167.81   12.10   0-0.30154 0.02429 0.14496 0.19473-0.95908 0.97861
  -4   7   0  347.49   11.48   0-0.30323 0.02397 0.14177 0.33333-0.95909 0.93937
  -4  11  -4    0.06    7.30   0-0.30586 0.01567 0.13675 0.61079-0.95908 0.78581
  -3 -10 -10    5.41    8.66   0-0.29763 0.07125 0.15236-0.82314-0.95901 0.57404
  -3  -8  -6    3.69    9.80   0-0.29732 0.07764 0.15294-0.69444-0.95900 0.72492
  -3  -7  -4   75.01    7.77   0-0.30788 0.09323 0.13289-0.60572-0.95905 0.79972
  -3  -6  -3  178.38    9.15   0-0.30018 0.08760 0.14755-0.55291-0.95906 0.83726
  -3  -5  -2  517.34   12.77   0-0.29725 0.08627 0.15307-0.49048-0.95900 0.87509
  -3  -4  -1  191.32    9.62   0-0.30079 0.09103 0.14639-0.41596-0.95907 0.91226
  -3   7   0    2.31    9.38   0-0.29753 0.08800 0.15255 0.32308-0.95901 0.94271
  -3  11  -4    7.55    7.31   0-0.30282 0.08400 0.14254 0.60643-0.95909 0.78852
  -2 -10 -10    8.84    7.77   0-0.30464 0.14655 0.13907-0.81367-0.95908 0.57770
  -2  -9  -8   32.27    7.27   0-0.29977 0.14643 0.14832-0.75609-0.95905 0.65226
  -2  -8  -6   13.75    6.83   0-0.30262 0.15261 0.14293-0.68284-0.95908 0.72832
  -2  -6  -3   12.39    7.66   0-0.30908 0.16506 0.13058-0.53586-0.95902 0.84097
  -2  -5  -2  234.28    9.13   0-0.30747 0.16537 0.13367-0.47108-0.95905 0.87873
  -2   4   1  130.65   13.76   0-0.29598 0.15735 0.15546 0.11640-0.95896 0.98676
  -2   8  -1   37.68    9.49   0-0.29939 0.15585 0.14905 0.39513-0.95905 0.90882
  -2   9  -2   15.95    7.21   0-0.30464 0.15961 0.13907 0.47251-0.95908 0.86978
  -2  10  -3    4.82    6.92   0-0.30282 0.15574 0.14254 0.53766-0.95909 0.83091
  -2  11  -4    3.51    9.53   0-0.29630 0.14659 0.15486 0.59372-0.95897 0.79248
  -2  12  -6  -11.48    7.21   0-0.30707 0.15121 0.13444 0.68127-0.95906 0.71701
  -1 -10 -11    9.00    9.26   0-0.29744 0.20687 0.15272-0.82623-0.95900 0.54303
  -1  -9  -8   10.82    6.71   0-0.30989 0.22524 0.12903-0.73643-0.95900 0.65680
  -1  -7  -5  170.15    8.44   0-0.30018 0.22238 0.14755-0.62061-0.95906 0.76919
  -1  11  -5   14.06    7.41   0-0.30888 0.22683 0.13096 0.61781-0.95902 0.75824
  -1  12  -6   21.83    9.69   0-0.29742 0.21279 0.15276 0.66496-0.95900 0.72009
   0 -10 -12    7.12    8.91   0-0.29616 0.27302 0.15513-0.83048-0.95897 0.50885
   0  -9  -9   11.25    7.44   0-0.30444 0.28709 0.13946-0.74672-0.95909 0.62278
   0  -8  -7   48.30    7.23   0-0.30626 0.29420 0.13598-0.67672-0.95907 0.69715
   0  -6  -4  181.43    8.72   0-0.31069 0.30339 0.12748-0.53305-0.95897 0.81083
   0  -5  -3   30.64    8.64   0-0.30707 0.30180 0.13444-0.47256-0.95906 0.84823
   0   4   0  260.63   11.90   0-0.30646 0.30394 0.13560 0.13660-0.95907 0.95690
   0   8  -2   53.22    7.50   0-0.30262 0.29521 0.14293 0.40031-0.95908 0.87857
   0   9  -3   14.21    7.01   0-0.30505 0.29705 0.13830 0.47376-0.95908 0.83949
   0  10  -4   -3.37    6.75   0-0.30262 0.29101 0.14293 0.53601-0.95908 0.80200
   0  11  -5   -7.55   10.23   0-0.29671 0.28214 0.15409 0.59246-0.95898 0.76309
   0  12  -7   -2.28    7.26   0-0.30424 0.28534 0.13984 0.67626-0.95909 0.68701
   1 -10 -13    3.18   10.73   0-0.29768 0.34159 0.15227-0.82649-0.95901 0.47515
   1  -9 -10    3.52    6.72   0-0.30383 0.35379 0.14061-0.74785-0.95909 0.58870
   1  -8  -8    5.30    6.98   0-0.30302 0.35703 0.14215-0.68233-0.95909 0.66407
   1  -6  -5   92.64    8.22   0-0.30140 0.36117 0.14524-0.55119-0.95908 0.77680
   1  -1  -1 3113.85   73.07   0-0.29533 0.36115 0.15668-0.22375-0.95894 0.92619
   1   5  -1  519.06   11.81   0-0.30727 0.37184 0.13405 0.20600-0.95906 0.92229
   1   7  -2    7.74    7.75   0-0.30424 0.36818 0.13984 0.33582-0.95909 0.88265
   1  10  -5    5.53    7.20   0-0.30788 0.36483 0.13289 0.54729-0.95905 0.76661
   1  11  -6   -1.05    7.40   0-0.30059 0.35368 0.14678 0.60060-0.95907 0.72930
   2  -9 -11   -1.35    7.28   0-0.30888 0.42821 0.13096-0.73700-0.95902 0.55443
   2  -8  -9    7.55    7.16   0-0.30606 0.42744 0.13637-0.67660-0.95907 0.62999
   2  -6  -6   68.69   11.13   0-0.29853 0.42591 0.15067-0.55640-0.95903 0.74203
   2  -3  -3  672.03   21.31   0-0.29332 0.42507 0.16045-0.36314-0.95886 0.85527
   2   6  -2   21.80   10.51   0-0.29673 0.42974 0.15405 0.25283-0.95898 0.88670
   2   7  -3   23.21    7.55   0-0.30908 0.43972 0.13058 0.34527-0.95902 0.84859
   2  10  -6    2.60    7.52   0-0.30848 0.43147 0.13173 0.54771-0.95903 0.73375
   2  11  -7    8.38    7.28   0-0.30038 0.42240 0.14716 0.60147-0.95906 0.69394
   3  -9 -13   10.46    8.63   0-0.29880 0.48021 0.15016-0.75436-0.95904 0.48293
   3  -6  -7  103.04    9.02   0-0.30687 0.50135 0.13482-0.54094-0.95906 0.70823
   3  -3  -4   -1.73   12.46   0-0.29732 0.49833 0.15294-0.35645-0.95900 0.82068
   3   6  -3  388.02   12.98   0-0.29732 0.49642 0.15294 0.25508-0.95900 0.85329
   3   7  -4   41.73    7.70   0-0.30788 0.50499 0.13289 0.34320-0.95905 0.81503
   3   9  -6    8.85    6.53   0-0.31009 0.50405 0.12864 0.48363-0.95899 0.73705
   3  10  -7    9.40    7.18   0-0.30505 0.49657 0.13830 0.54199-0.95908 0.69841
   3  11  -8   -1.49    9.77   0-0.29701 0.48439 0.15352 0.59444-0.95899 0.66105
   4   5  -4   38.24    8.28   0-0.30747 0.57517 0.13367 0.20658-0.95905 0.81993
   4   7  -5    2.62    6.88   0-0.30181 0.56679 0.14447 0.33086-0.95908 0.78108
   4   8  -6   36.59    7.13   0-0.30505 0.56788 0.13830 0.40514-0.95908 0.74229
   4   9  -7    2.42    7.20   0-0.30323 0.56335 0.14177 0.47018-0.95909 0.70418
   4  10  -8   13.65   10.19   0-0.29791 0.55685 0.15183 0.52875-0.95902 0.66432
   5  -8 -15   -6.80    9.76   0-0.29486 0.61472 0.15755-0.69680-0.95892 0.41316
   5  -7 -12    5.24    7.42   0-0.30687 0.62992 0.13482-0.60678-0.95906 0.52701
   5   4  -5  119.49    8.09   0-0.30747 0.64240 0.13367 0.13912-0.95905 0.78654
   5   5  -5  111.98   10.06   0-0.29732 0.63052 0.15294 0.18718-0.95900 0.78496
   5   6  -6   87.42    7.68   0-0.30828 0.64049 0.13212 0.27681-0.95904 0.74756
   5   9  -9    3.62    7.03   0-0.30928 0.63576 0.13019 0.48261-0.95901 0.63084
   5  10 -10    4.92    7.59   0-0.30221 0.62624 0.14370 0.53718-0.95908 0.59222
   6  -7 -15    6.11    8.88   0-0.29428 0.68193 0.15866-0.63156-0.95890 0.41570
   6  -1  -7    5.92    8.11   0-0.30626 0.70841 0.13598-0.20319-0.95907 0.71674
   6   2  -6    2.19    9.26   0-0.29598 0.69900 0.15546-0.01905-0.95896 0.75284
   6   5  -7   -0.32    7.11   0-0.30586 0.70591 0.13675 0.20378-0.95908 0.71403
   6   7  -8    7.49   10.02   0-0.29773 0.69623 0.15217 0.32430-0.95901 0.67404
   6   8  -9   -9.34   10.64   0-0.29783 0.69308 0.15198 0.39343-0.95901 0.63664
   6   9 -11   -6.56    7.71   0-0.30868 0.69891 0.13135 0.48204-0.95903 0.56000
   7   1  -8   -0.11    9.67   0-0.29671 0.76434 0.15409-0.08401-0.95898 0.68189
   7   2  -8   12.42    8.44   0-0.30038 0.76872 0.14716-0.01054-0.95906 0.68137
   7   3  -8   -4.44   10.33   0-0.29783 0.76634 0.15198 0.05377-0.95901 0.68110
   7   5  -9    9.77    7.07   0-0.30606 0.77200 0.13637 0.20430-0.95907 0.64119
   7   7 -10   -5.27   10.43   0-0.29691 0.75851 0.15371 0.32340-0.95899 0.60273
   7   8 -12    2.98    7.83   0-0.30868 0.76647 0.13135 0.41464-0.95903 0.52652
   7   8 -11   17.03    8.70   0-0.29623 0.75544 0.15499 0.38865-0.95897 0.56339
   8  -2 -12   18.02   11.45   0-0.29703 0.82720 0.15349-0.28613-0.95899 0.53298
   8   4 -11   13.27    7.21   0-0.30747 0.83900 0.13367 0.13968-0.95905 0.56974
   8   5 -11   -2.74    9.51   0-0.29763 0.82801 0.15236 0.19011-0.95901 0.57004
   8   6 -12   14.53    7.19   0-0.30221 0.83093 0.14370 0.26562-0.95908 0.53045
   9   0 -14    2.61    8.68   0-0.30707 0.90228 0.13444-0.13176-0.95906 0.46216
   9   2 -13    1.25   10.27   0-0.29650 0.89328 0.15448-0.01631-0.95898 0.49843
   9   3 -13   -1.64    8.60   0-0.29640 0.89057 0.15467 0.05259-0.95897 0.49979
   9   4 -14    6.19    7.36   0-0.30606 0.90051 0.13637 0.13776-0.95907 0.45963
 -12  -1  -4    0.23    9.72   0-0.28026-0.55920 0.18323-0.24939-0.95781 0.76031
 -12   1  -3   -0.49    7.76   0-0.28785-0.55098 0.16926-0.09974-0.95843 0.79777
 -12   2  -3    0.23   10.28   0-0.28036-0.55854 0.18304-0.04581-0.95782 0.79672
 -11  -4  -5   -1.20    7.23   0-0.28557-0.48588 0.17347-0.44320-0.95827 0.72826
 -11  -3  -4    3.05    7.37   0-0.28599-0.48505 0.17271-0.37207-0.95830 0.76593
 -11  -2  -3   -2.62    7.04   0-0.29260-0.47524 0.16043-0.29490-0.95869 0.80357
 -11   1  -2   -2.25    9.94   0-0.28047-0.48624 0.18285-0.11415-0.95783 0.83917
 -11   4  -2   -1.82   10.41   0-0.27266-0.49470 0.19703 0.07500-0.95696 0.83703
 -10  -6  -6  -12.79    7.40   0-0.29260-0.41033 0.16043-0.56552-0.95869 0.69539
 -10  -5  -5   -2.63    6.56   0-0.28599-0.41520 0.17271-0.51029-0.95830 0.73249
 -10  -4  -4   -1.15    8.06   0-0.28162-0.41549 0.18074-0.44996-0.95794 0.76946
 -10  -3  -3   -1.23    7.12   0-0.28474-0.41302 0.17501-0.37753-0.95820 0.80739
 -10   1  -1   21.11    8.51   0-0.28307-0.41043 0.17807-0.10890-0.95807 0.88229
 -10   4  -1   -1.04   10.44   0-0.27421-0.42123 0.19423 0.07708-0.95715 0.87880
  -9  -7  -7    0.35    7.41   0-0.28515-0.35006 0.17424-0.64704-0.95824 0.66129
  -9  -6  -5    2.42    7.24   0-0.29342-0.33786 0.15890-0.56443-0.95873 0.73728
  -9  -5  -4    1.27    6.67   0-0.28785-0.34178 0.16926-0.50738-0.95843 0.77454
  -9  -4  -3    2.03    6.70   0-0.28619-0.34173 0.17232-0.44293-0.95831 0.81192
  -9  -3  -2   -0.24    6.78   0-0.29012-0.33613 0.16504-0.36814-0.95856 0.84971
  -9  -1  -1    2.43    9.14   0-0.28036-0.34623 0.18304-0.24822-0.95782 0.88612
  -9   8  -2   -0.19   10.66   0-0.26326-0.37023 0.21387 0.33512-0.95560 0.84262
  -8  -8  -8   -0.37    6.97   0-0.28474-0.28264 0.17501-0.71520-0.95820 0.62753
  -8  -7  -6   -5.11    6.91   0-0.28785-0.27569 0.16926-0.64238-0.95843 0.70330
  -8  -2  -1   45.16   10.07   0-0.27779-0.27735 0.18774-0.32194-0.95756 0.89097
  -8   0   0   82.31   10.01   0-0.27857-0.27525 0.18631-0.18563-0.95764 0.92813
  -7  -9  -9    4.31    6.83   0-0.29095-0.21187 0.16351-0.76970-0.95861 0.59505
  -7  -8  -7    0.04    6.58   0-0.28971-0.20616 0.16581-0.70646-0.95854 0.66976
  -7  -6  -4   10.92    6.98   0-0.28661-0.20623 0.17156-0.57558-0.95834 0.78300
  -7  -5  -3   39.84   10.07   0-0.28099-0.20893 0.18189-0.51916-0.95788 0.81984
  -7  -4  -2   12.44    9.33   0-0.28012-0.20900 0.18348-0.45261-0.95780 0.85744
  -7  -3  -1   64.37    7.29   0-0.28557-0.20012 0.17347-0.37496-0.95827 0.89564
  -7   8  -1   31.74    7.48   0-0.28847-0.19967 0.16811 0.37687-0.95847 0.88944
  -6  -9  -9   -5.60    6.93   0-0.28328-0.14716 0.17768-0.78563-0.95809 0.59769
  -6  -8  -7    9.51    9.60   0-0.28045-0.14790 0.18288-0.72109-0.95783 0.67308
  -6  -7  -5   -6.39    6.64   0-0.28702-0.13553 0.17079-0.64434-0.95837 0.74891
  -6  -2   0  267.39    9.98   0-0.28599-0.12888 0.17271-0.30669-0.95830 0.93692
  -6   5   1    9.13   10.57   0-0.27134-0.14315 0.19942 0.14007-0.95679 0.96936
  -6   7   0   21.24    7.95   0-0.28868-0.12810 0.16773 0.30817-0.95848 0.93188
  -5  -9  -9   -6.94    8.34   0-0.27900-0.08252 0.18552-0.79561-0.95769 0.60082
  -5  -9  -8    6.56    6.53   0-0.29363-0.06833 0.15851-0.76563-0.95873 0.64086
  -5  -7  -5   16.14    9.23   0-0.28073-0.07478 0.18236-0.65410-0.95786 0.75256
  -5  -5  -2   20.37    7.35   0-0.29383-0.05584 0.15813-0.49502-0.95874 0.86662
  -5   0   1  354.29   15.20   0-0.27978-0.06464 0.18411-0.18261-0.95777 0.97747
  -5   9  -1   19.25    8.91   0-0.27655-0.07370 0.18998 0.42141-0.95743 0.89516
  -5  10  -2   10.43   10.36   0-0.27875-0.07430 0.18597 0.49457-0.95766 0.85671
  -4 -10 -11   -8.31    6.98   0-0.28391-0.01172 0.17654-0.85128-0.95814 0.52997
  -4  -9  -8    1.15    7.13   0-0.29198 0.00245 0.16159-0.76960-0.95866 0.64393
  -4  -8  -6    4.57    6.92   0-0.29342 0.00488 0.15890-0.69890-0.95873 0.72007
  -4  -7  -5   19.09   10.01   0-0.27977-0.00707 0.18412-0.65784-0.95776 0.75691
  -4  -5  -2   37.52    7.42   0-0.29239 0.01197 0.16082-0.49766-0.95868 0.87068
  -4   9  -1   35.79   10.86   0-0.27977-0.00097 0.18412 0.42678-0.95776 0.89946
  -4  10  -2    0.13    9.80   0-0.28099-0.00442 0.18189 0.49717-0.95788 0.86205
  -4  11  -3    5.46    8.87   0-0.27978-0.00516 0.18411 0.56134-0.95777 0.82148
  -3 -10 -11    4.11    7.11   0-0.28495 0.05570 0.17462-0.84920-0.95822 0.53456
  -3  -9  -8   -0.46    6.64   0-0.29383 0.07360 0.15813-0.76623-0.95874 0.64791
  -3  -7  -5   -5.51   10.19   0-0.28036 0.06625 0.18304-0.65623-0.95782 0.75964
  -3   0   1 1384.55   29.42   0-0.28015 0.07333 0.18342-0.18156-0.95780 0.98467
  -3   5   1  406.10   12.78   0-0.29136 0.08336 0.16274 0.17720-0.95863 0.98220
  -3   9  -1   53.95    9.52   0-0.27753 0.06525 0.18820 0.42252-0.95753 0.90265
  -3  10  -2    3.70    9.35   0-0.27890 0.06437 0.18571 0.49475-0.95768 0.86469
  -2 -10 -11    0.61    7.17   0-0.28930 0.13224 0.16658-0.84127-0.95852 0.53816
  -2  -9  -9   -5.43    9.08   0-0.28036 0.12765 0.18304-0.79007-0.95782 0.61262
  -2  -8  -7   47.74   10.31   0-0.27998 0.12996 0.18373-0.72527-0.95779 0.68851
  -2  -7  -5    8.80    7.14   0-0.28723 0.13935 0.17041-0.64342-0.95839 0.76481
  -2  -2   0 9297.97   49.44   0-0.29260 0.15325 0.16043-0.29436-0.95869 0.95281
  -2   7   0   86.83    7.71   0-0.28495 0.14430 0.17462 0.30063-0.95822 0.94660
  -2  12  -5    9.06    7.02   0-0.28599 0.13444 0.17271 0.64414-0.95830 0.75356
  -1 -10 -12   -4.18    7.14   0-0.28307 0.19315 0.17807-0.85246-0.95807 0.50368
  -1  -9  -9   -6.70    6.76   0-0.28992 0.20613 0.16542-0.77301-0.95855 0.61749
  -1  -8  -7    3.74    6.53   0-0.28971 0.20724 0.16581-0.70653-0.95854 0.69342
  -1  -6  -4  385.23   10.30   0-0.28806 0.21172 0.16888-0.57430-0.95844 0.80633
  -1  -5  -3  425.82   13.54   0-0.28050 0.20550 0.18279-0.52045-0.95784 0.84342
  -1  -4  -2   25.23   12.74   0-0.28006 0.20764 0.18360-0.45390-0.95779 0.88059
  -1  -3  -1   34.84   11.89   0-0.29239 0.22106 0.16082-0.36247-0.95868 0.91933
  -1   6   0   23.38    7.81   0-0.29301 0.22166 0.15967 0.24779-0.95871 0.95157
  -1   8  -1   79.91    7.82   0-0.28515 0.21132 0.17424 0.36912-0.95824 0.91190
  -1   9  -2   34.47    7.58   0-0.29116 0.21547 0.16312 0.44824-0.95862 0.87397
  -1  10  -3   20.26    7.00   0-0.29095 0.21352 0.16351 0.51593-0.95861 0.83534
  -1  11  -4    2.40    7.01   0-0.28599 0.20449 0.17271 0.57450-0.95830 0.79733
  -1  12  -5   -1.83    8.25   0-0.27890 0.19458 0.18571 0.62727-0.95768 0.75792
   0 -10 -13    1.91    9.66   0-0.28078 0.25551 0.18227-0.85687-0.95786 0.46965
   0  -9 -10    0.91    6.77   0-0.28453 0.26789 0.17539-0.78276-0.95819 0.58311
   0  -8  -8   49.73   10.29   0-0.28071 0.26611 0.18240-0.72321-0.95786 0.65777
   0  -7  -6   53.01    7.52   0-0.28764 0.27739 0.16964-0.64314-0.95841 0.73387
   0   5   0   -0.29    7.84   0-0.28764 0.28654 0.16964 0.16831-0.95841 0.95583
   0   7  -1   25.42    6.97   0-0.29136 0.28708 0.16274 0.31185-0.95863 0.91714
   0  12  -6    0.79    7.42   0-0.28599 0.26925 0.17271 0.64291-0.95830 0.72461
   1 -10 -14    2.91    8.74   0-0.28241 0.32434 0.17929-0.85270-0.95801 0.43583
   1  -9 -11   28.34    7.16   0-0.28391 0.33321 0.17654-0.78412-0.95814 0.54904
   1  -8  -9    5.65    8.76   0-0.27901 0.33184 0.18551-0.72861-0.95769 0.62368
   1  -7  -7   -6.44    9.04   0-0.28057 0.33900 0.18266-0.65506-0.95784 0.69918
   1  -5  -4   -5.34    8.11   0-0.29198 0.35591 0.16159-0.49952-0.95866 0.81286
   1  -4  -3   21.80    9.29   0-0.29219 0.35495 0.16120-0.43129-0.95867 0.85170
   1   6  -1  111.74    8.23   0-0.28723 0.35195 0.17041 0.23682-0.95839 0.92116
   1   8  -2   77.36   10.13   0-0.28055 0.34375 0.18269 0.36068-0.95784 0.88105
   1   9  -3    9.85    6.69   0-0.28557 0.34691 0.17347 0.43814-0.95827 0.84275
   1  10  -4   15.97    6.99   0-0.28474 0.34391 0.17501 0.50515-0.95820 0.80426
   1  11  -5   14.42   10.11   0-0.28032 0.33692 0.18311 0.56483-0.95782 0.76508
   1  12  -7   -9.22    7.92   0-0.28951 0.34019 0.16619 0.64987-0.95853 0.69079
   2  -9 -12   10.96    7.76   0-0.28868 0.40406 0.16773-0.77525-0.95848 0.51534
   2  -8 -10   -3.28    9.55   0-0.27974 0.40151 0.18418-0.72386-0.95776 0.58980
   2  -7  -8   19.46    9.59   0-0.28044 0.40397 0.18290-0.65611-0.95783 0.66527
   2  -5  -5   62.22    8.48   0-0.28536 0.41420 0.17386-0.51185-0.95825 0.77922
   2  -4  -4 1539.61   23.86   0-0.27974 0.41013 0.18418-0.45475-0.95776 0.81625
   2   2  -1 6554.12   42.05   0-0.28826 0.42284 0.16849-0.03204-0.95845 0.92765
   2   3  -1  991.66   17.33   0-0.28806 0.42243 0.16888 0.03543-0.95844 0.92704
   2   4  -1  175.86   13.44   0-0.28073 0.41493 0.18236 0.08972-0.95786 0.92582
   2   8  -3    9.01    7.55   0-0.28640 0.41730 0.17194 0.37150-0.95833 0.84722
   2   9  -4   49.79    7.77   0-0.28951 0.41751 0.16619 0.44536-0.95853 0.80921
   2  10  -5   31.04    7.81   0-0.28744 0.41333 0.17003 0.51096-0.95840 0.77001
   2  11  -6   -1.26    8.81   0-0.28109 0.40400 0.18170 0.56777-0.95789 0.73248
   3  -9 -14   11.05    9.27   0-0.28208 0.46260 0.17990-0.78671-0.95798 0.44282
   3  -8 -11    2.68    7.48   0-0.28951 0.47620 0.16619-0.70651-0.95853 0.55665
   3  -7  -9   52.17    7.36   0-0.28889 0.48019 0.16734-0.64110-0.95849 0.63094
   3  -5  -6  102.11    9.34   0-0.29054 0.48634 0.16427-0.50290-0.95859 0.74525
   3  -4  -5  946.76   21.32   0-0.28066 0.47826 0.18250-0.45338-0.95785 0.78177
   3   1  -2  190.12   11.79   0-0.28287 0.48492 0.17845-0.10973-0.95805 0.89390
   3   2  -2    3.50    8.64   0-0.29424 0.49785 0.15736-0.02173-0.95876 0.89306
   3   3  -2   -3.29    9.09   0-0.29301 0.49612 0.15967 0.04326-0.95871 0.89250
   3   4  -2   29.76    8.17   0-0.28536 0.48695 0.17386 0.09719-0.95825 0.89229
   3   7  -3   19.10    9.66   0-0.28015 0.47860 0.18342 0.28999-0.95780 0.85069
   3   8  -4   -5.48    7.00   0-0.28640 0.48379 0.17194 0.37101-0.95833 0.81406
   3   9  -5   -0.35    6.90   0-0.28847 0.48334 0.16811 0.44302-0.95847 0.77572
   3  10  -6   -5.40    7.18   0-0.28578 0.47827 0.17309 0.50650-0.95828 0.73717
   3  11  -7    0.09   10.23   0-0.28005 0.46956 0.18361 0.56391-0.95779 0.69803
   4  -8 -13    2.71    8.54   0-0.28391 0.53581 0.17654-0.71647-0.95814 0.48407
   4  -6  -9   12.56    9.41   0-0.27868 0.53896 0.18612-0.59187-0.95765 0.63448
   4   2  -3  709.47   14.75   0-0.28744 0.55674 0.17003-0.03355-0.95840 0.85948
   4   3  -3  104.06    9.20   0-0.28723 0.55636 0.17041 0.03383-0.95839 0.85901
   4   4  -3   13.74   10.88   0-0.28141 0.55147 0.18113 0.09058-0.95792 0.85716
   4   6  -4  198.56    9.12   0-0.29136 0.55817 0.16274 0.24520-0.95863 0.81934
   4   8  -5   -0.80    8.52   0-0.28015 0.54737 0.18342 0.36361-0.95780 0.77864
   4   9  -6   30.38    7.42   0-0.28328 0.54610 0.17768 0.43396-0.95809 0.74061
   4  10  -7   14.54    9.73   0-0.28040 0.54125 0.18296 0.49719-0.95783 0.70123
   4  11  -9   -6.78    8.06   0-0.28930 0.54432 0.16658 0.58171-0.95852 0.62668
   5  -5  -9   44.31   11.29   0-0.28231 0.61113 0.17947-0.51816-0.95800 0.63682
   5   6  -5  107.55    9.62   0-0.28141 0.61603 0.18113 0.22679-0.95792 0.78437
   5   7  -6   26.87    7.51   0-0.29116 0.62385 0.16312 0.31193-0.95862 0.74609
   5   8  -7   -5.50    7.20   0-0.29404 0.62376 0.15775 0.38618-0.95875 0.70821
   5   9  -8    2.79    7.10   0-0.29239 0.61972 0.16082 0.45139-0.95868 0.66971
   5  10  -9   10.34    7.42   0-0.28723 0.61340 0.17041 0.51007-0.95839 0.62960
   6  -6 -13    0.69    8.89   0-0.28015 0.67308 0.18342-0.59071-0.95780 0.48891
   6  -5 -11   10.08   11.58   0-0.27895 0.67312 0.18562-0.52361-0.95768 0.56476
   6   1  -6  204.05   10.14   0-0.28826 0.69132 0.16849-0.09921-0.95845 0.75348
   6   3  -6   -0.74    6.47   0-0.29404 0.69659 0.15775 0.04670-0.95875 0.75235
   6   4  -6    5.90    7.25   0-0.28785 0.69093 0.16926 0.10267-0.95843 0.75104
   6   5  -6  133.41   10.77   0-0.28015 0.68132 0.18342 0.15643-0.95780 0.74939
   6   6  -7    0.70    7.05   0-0.29219 0.69147 0.16120 0.24676-0.95867 0.71279
   6   8  -8   39.12   10.43   0-0.28057 0.67797 0.18266 0.36171-0.95784 0.67172
   6   9 -10   -5.36    7.69   0-0.29424 0.68662 0.15736 0.45550-0.95876 0.59764
   6   9  -9    3.12   10.09   0-0.27963 0.67308 0.18438 0.42745-0.95775 0.63423
   7  -6 -16    1.64   11.85   0-0.26418 0.71635 0.21224-0.61528-0.95575 0.37720
   7   0  -8    0.36    9.65   0-0.27869 0.74746 0.18609-0.18524-0.95766 0.68003
   7   4  -8    7.09    7.02   0-0.29219 0.76039 0.16120 0.11108-0.95867 0.67908
   7   5  -8    3.36    7.28   0-0.28328 0.75116 0.17768 0.16243-0.95809 0.67787
   7   6  -9   -2.83    6.97   0-0.29280 0.75749 0.16005 0.24886-0.95870 0.64089
   7   7  -9  -11.66    9.60   0-0.27942 0.74229 0.18476 0.29097-0.95773 0.63961
   7   8 -10   -1.16    9.87   0-0.27994 0.74134 0.18380 0.36099-0.95778 0.60081
   8  -3 -13    0.18   14.25   0-0.26437 0.79403 0.21190-0.41412-0.95578 0.49355
   8  -1 -11    0.15   11.08   0-0.28391 0.81615 0.17654-0.24299-0.95814 0.57129
   8   1 -10   36.95    8.04   0-0.28599 0.82058 0.17271-0.10315-0.95830 0.60744
   8   2 -10   21.89    7.51   0-0.29219 0.82623 0.16120-0.02397-0.95867 0.60738
   8   3 -10   -1.87    6.81   0-0.29116 0.82413 0.16312 0.04290-0.95862 0.60833
   8   4 -10    7.78    6.82   0-0.28640 0.81964 0.17194 0.10068-0.95833 0.60652
   8   5 -10    0.56    8.79   0-0.27869 0.81148 0.18609 0.15466-0.95766 0.60496
   8   6 -11    7.31    7.38   0-0.28578 0.81671 0.17309 0.23569-0.95828 0.56732
   8   7 -12    8.94    7.30   0-0.28764 0.81619 0.16964 0.30730-0.95841 0.52883
   9  -2 -15    1.65   11.53   0-0.28064 0.87332 0.18253-0.31557-0.95785 0.42334
   9  -1 -14    0.11   10.17   0-0.28015 0.87841 0.18342-0.24952-0.95780 0.45878
   9   0 -13   35.16   11.75   0-0.27989 0.87628 0.18391-0.18221-0.95778 0.49587
   9   1 -13    1.42    8.07   0-0.29157 0.88819 0.16235-0.09068-0.95864 0.49958
   9   4 -13    9.05    7.49   0-0.28992 0.88624 0.16542 0.10791-0.95855 0.49655
   9   5 -13   -1.72   10.18   0-0.28109 0.87772 0.18170 0.16186-0.95789 0.49583
 -12   0  -4   -5.02   11.06   0-0.26303-0.57630 0.21353-0.21208-0.95541 0.75794
 -11  -4  -6   -3.60    9.94   0-0.26356-0.50822 0.21258-0.48217-0.95550 0.68745
 -11  -3  -5   -1.28    9.37   0-0.26185-0.51027 0.21561-0.41837-0.95522 0.72480
 -11  -2  -4    1.95    9.33   0-0.26313-0.50572 0.21334-0.34796-0.95543 0.76270
 -11  -1  -3    1.57    7.55   0-0.27289-0.49489 0.19586-0.26264-0.95684 0.80172
 -11   2  -2    3.56    6.81   0-0.27057-0.49666 0.20005-0.06072-0.95654 0.83800
 -11   3  -2   -1.01    9.75   0-0.26633-0.50119 0.20765-0.00040-0.95593 0.83695
 -10  -6  -7   -2.46    7.48   0-0.27479-0.42966 0.19243-0.59756-0.95707 0.65586
 -10  -5  -6    4.14    8.73   0-0.26548-0.43945 0.20917-0.54425-0.95580 0.69266
 -10  -2  -3    7.17    8.65   0-0.26082-0.43858 0.21744-0.35034-0.95504 0.80459
 -10  -1  -2    1.98    7.85   0-0.27226-0.42399 0.19700-0.26435-0.95676 0.84352
 -10   2  -1   13.60    7.66   0-0.27268-0.42322 0.19624-0.05863-0.95681 0.88024
 -10   3  -1   10.23    9.90   0-0.26613-0.42942 0.20801-0.00234-0.95590 0.87855
  -9  -7  -8   -3.57    7.19   0-0.26888-0.36790 0.20309-0.67598-0.95631 0.62132
  -9  -6  -6   -2.65    7.14   0-0.27353-0.35929 0.19472-0.60021-0.95692 0.69749
  -9  -5  -5    0.23    8.64   0-0.26377-0.36540 0.21220-0.54939-0.95553 0.73368
  -9  -2  -2   20.63    9.68   0-0.26441-0.36272 0.21106-0.34398-0.95564 0.84722
  -8  -8  -9   -1.93    7.16   0-0.26972-0.29910 0.20157-0.74166-0.95642 0.58752
  -8  -7  -7    0.27    7.15   0-0.26972-0.29547 0.20157-0.67479-0.95642 0.66324
  -8  -6  -5   -9.62    7.36   0-0.27731-0.28411 0.18786-0.59389-0.95736 0.73981
  -8  -5  -4   -2.49    6.56   0-0.26951-0.29005 0.20195-0.54030-0.95639 0.77632
  -8  -4  -3    5.74    6.80   0-0.26590-0.29439 0.20841-0.47709-0.95587 0.81384
  -8  -3  -2   77.65    7.87   0-0.26739-0.28918 0.20575-0.40762-0.95609 0.85174
  -8   9  -2   -0.49    8.96   0-0.26484-0.29797 0.21031 0.40181-0.95570 0.84603
  -7  -8  -8   -7.09    6.82   0-0.27289-0.22446 0.19586-0.73629-0.95684 0.62976
  -7  -7  -6    2.71    7.30   0-0.27542-0.21823 0.19129-0.66479-0.95715 0.70574
  -7  -6  -5   16.49    9.46   0-0.26312-0.23105 0.21337-0.61758-0.95543 0.74205
  -7  -1   0   -4.82    7.08   0-0.27416-0.20946 0.19358-0.26202-0.95700 0.93104
  -7   7   0    6.18    8.78   0-0.26052-0.22470 0.21798 0.25768-0.95499 0.92453
  -6  -9 -10   -2.51    7.42   0-0.26888-0.16308 0.20309-0.81087-0.95631 0.55749
  -6  -8  -8   13.02    9.73   0-0.26336-0.16725 0.21293-0.75174-0.95547 0.63271
  -6  -7  -6    0.54    6.80   0-0.26548-0.15873 0.20917-0.68262-0.95580 0.70813
  -6  -6  -4   -3.82    6.66   0-0.27647-0.14396 0.18938-0.59571-0.95726 0.78519
  -6  -5  -3   55.35    7.50   0-0.26930-0.15140 0.20233-0.53985-0.95636 0.82220
  -6  -4  -2   48.86    7.21   0-0.26675-0.15104 0.20689-0.47643-0.95600 0.85986
  -6  -3  -1   59.41    7.10   0-0.27099-0.14575 0.19929-0.40106-0.95660 0.89785
  -6   1   1    2.38    9.80   0-0.26675-0.14746 0.20689-0.13771-0.95600 0.97093
  -6   9  -1   30.74    9.76   0-0.26388-0.15390 0.21202 0.39942-0.95555 0.89142
  -6  10  -2   -4.24    7.05   0-0.26845-0.15551 0.20385 0.47528-0.95624 0.85312
  -5  -9 -10   -1.60    9.69   0-0.26271-0.10218 0.21410-0.82095-0.95536 0.56087
  -5  -8  -7   -2.87    7.05   0-0.27542-0.08125 0.19129-0.73230-0.95715 0.67573
  -5  -6  -4    1.22    6.95   0-0.26930-0.08167 0.20233-0.60848-0.95636 0.78796
  -5  -5  -3  129.22   10.09   0-0.26179-0.08887 0.21573-0.55364-0.95521 0.82577
  -5  -2   0   18.49    8.23   0-0.27479-0.07118 0.19243-0.32694-0.95707 0.93939
  -5   6   1  195.89   12.30   0-0.26017-0.08558 0.21860 0.18875-0.95493 0.97089
  -5   8   0    2.46    9.27   0-0.26121-0.08696 0.21675 0.32776-0.95511 0.93238
  -5  11  -3    3.52    7.19   0-0.27374-0.08133 0.19434 0.55495-0.95695 0.81843
  -4  -9  -9    0.99    7.08   0-0.27521-0.01605 0.19167-0.79982-0.95712 0.60397
  -4  -8  -7    1.91    6.78   0-0.27268-0.01463 0.19624-0.73706-0.95681 0.67914
  -4  -6  -4  175.27    8.86   0-0.26590-0.01730 0.20841-0.61348-0.95587 0.79180
  -4  -2   0  105.38    9.56   0-0.26993-0.00731 0.20119-0.33497-0.95645 0.94281
  -4   0   1    3.10    9.38   0-0.27015-0.00521 0.20081-0.20007-0.95648 0.97947
  -4   6   1   -5.15    9.32   0-0.26495-0.01255 0.21012 0.19710-0.95572 0.97675
  -4   8   0   -0.60    8.43   0-0.26484-0.01571 0.21031 0.33355-0.95570 0.93795
  -3 -10 -12    3.21    7.39   0-0.27142 0.04341 0.19853-0.87311-0.95665 0.49376
  -3  -9  -9   16.97    6.72   0-0.27605 0.05112 0.19015-0.79790-0.95722 0.60847
  -3  -8  -7   35.12    7.67   0-0.27353 0.05292 0.19472-0.73514-0.95692 0.68319
  -3  -6  -4   99.09    8.01   0-0.26739 0.05288 0.20575-0.61110-0.95609 0.79601
  -3  -2   0 1988.67   22.84   0-0.27416 0.06592 0.19358-0.32740-0.95700 0.94718
  -3   6   1   10.87   10.21   0-0.26377 0.05689 0.21220 0.19487-0.95553 0.97935
  -3   8   0   -1.59    9.53   0-0.26377 0.05319 0.21220 0.33045-0.95553 0.94135
  -3  11  -3   -0.17    6.95   0-0.27521 0.05701 0.19167 0.55551-0.95712 0.82726
  -3  12  -4    4.70    7.18   0-0.26760 0.04899 0.20537 0.61159-0.95612 0.78659
  -2 -10 -13   -6.25   10.01   0-0.26271 0.10208 0.21410-0.88898-0.95536 0.45834
  -2 -10 -12   -2.04    7.36   0-0.27521 0.11641 0.19167-0.86638-0.95712 0.49811
  -2  -9 -10    7.93    9.41   0-0.26326 0.10571 0.21312-0.82095-0.95545 0.57242
  -2  -6  -4  268.53    9.04   0-0.27416 0.12856 0.19358-0.59908-0.95700 0.80071
  -2  -5  -3    2.18    9.38   0-0.26441 0.12052 0.21106-0.54898-0.95564 0.83661
  -2  -4  -2   99.68   11.74   0-0.26161 0.11959 0.21605-0.48589-0.95518 0.87470
  -2  -3  -1  824.20   16.26   0-0.26697 0.12602 0.20651-0.40830-0.95603 0.91270
  -2   5   1   90.10    9.14   0-0.27353 0.13519 0.19472 0.14542-0.95692 0.98482
  -2   9  -1   -7.06    7.41   0-0.26888 0.12527 0.20309 0.40720-0.95631 0.90701
  -2  10  -2   61.69    7.74   0-0.27226 0.12789 0.19700 0.48224-0.95676 0.86856
  -2  11  -3   17.44    6.75   0-0.26993 0.12371 0.20119 0.54647-0.95645 0.82954
  -2  12  -4    5.05    9.67   0-0.26340 0.11412 0.21287 0.60347-0.95547 0.78953
  -1 -10 -13    1.37    6.96   0-0.26930 0.17761 0.20233-0.87678-0.95636 0.46327
  -1  -9 -10   19.94    6.61   0-0.27120 0.18352 0.19891-0.80689-0.95662 0.57722
  -1  -8  -8   53.16    7.28   0-0.26590 0.18255 0.20841-0.74938-0.95587 0.65149
  -1  -7  -6   10.57    6.91   0-0.27015 0.18975 0.20081-0.67429-0.95648 0.72830
  -1  -1   0  946.49   25.90   0-0.26803 0.19733 0.20461-0.27083-0.95618 0.95359
  -1   3   1 1399.81   23.30   0-0.26866 0.19950 0.20347 0.00116-0.95628 0.98921
  -1   4   1  219.80   15.10   0-0.26303 0.19379 0.21353 0.05865-0.95541 0.98784
  -1   7   0  109.39    7.44   0-0.26845 0.19691 0.20385 0.27158-0.95624 0.94915
  -1  10  -2    7.27    9.29   0-0.26292 0.18748 0.21372 0.46564-0.95540 0.87005
  -1  11  -3   -3.00    8.05   0-0.26292 0.18538 0.21372 0.53090-0.95540 0.83148
   0 -10 -14    4.15    7.45   0-0.26760 0.24062 0.20537-0.88039-0.95612 0.42908
   0  -9 -11    6.00    8.52   0-0.26569 0.24468 0.20879-0.81661-0.95584 0.54232
   0  -6  -5  175.73    8.57   0-0.27078 0.26157 0.19967-0.60532-0.95657 0.76984
   0  -2  -1 1968.25   30.34   0-0.27374 0.27048 0.19434-0.32865-0.95695 0.92085
   0   6   0  106.43    8.58   0-0.26845 0.26602 0.20385 0.20366-0.95624 0.95353
   0   8  -1   25.02    7.11   0-0.26697 0.26312 0.20651 0.33683-0.95603 0.91419
   0   9  -2   14.62    6.65   0-0.27521 0.26935 0.19167 0.42007-0.95712 0.87642
   0  10  -3   14.07    7.05   0-0.27668 0.26815 0.18900 0.49022-0.95729 0.83854
   0  11  -4    8.99    7.76   0-0.27311 0.26276 0.19548 0.55287-0.95687 0.79920
   0  12  -5   11.18    7.39   0-0.26633 0.25363 0.20765 0.60848-0.95593 0.75949
   1  -9 -12   -4.99    8.46   0-0.26292 0.30884 0.21372-0.81810-0.95540 0.50864
   1   3   0    1.43   10.42   0-0.26803 0.33687 0.20461-0.00233-0.95618 0.95838
   1   4   0  271.62   15.05   0-0.26399 0.33079 0.21183 0.06025-0.95557 0.95776
   1   7  -1  102.00    8.69   0-0.26675 0.33139 0.20689 0.26839-0.95600 0.91883
   1  12  -6    0.43    7.16   0-0.27163 0.32450 0.19815 0.61757-0.95668 0.72758
   2  -9 -13   15.63    7.66   0-0.27036 0.38396 0.20043-0.80829-0.95651 0.47450
   2   1  -1 4775.88   43.99   0-0.27078 0.40547 0.19967-0.13109-0.95657 0.92636
   2   5  -1   87.55    8.35   0-0.26930 0.40339 0.20233 0.13768-0.95636 0.92388
   2   7  -2  163.35    9.04   0-0.27605 0.40796 0.19015 0.28588-0.95722 0.88536
   2   9  -3   16.84   10.02   0-0.26348 0.39429 0.21272 0.39902-0.95549 0.84443
   2  10  -4   -9.96    8.76   0-0.26399 0.39168 0.21182 0.46912-0.95557 0.80739
   2  11  -5   -7.50   10.01   0-0.26292 0.38871 0.21372 0.53318-0.95540 0.76658
   3  -9 -15   -0.59    9.01   0-0.26431 0.44440 0.21125-0.81585-0.95562 0.40246
   3  -8 -12    8.87    9.95   0-0.26378 0.44821 0.21220-0.75190-0.95553 0.51462
   3  -6  -8    6.24    9.25   0-0.26000 0.45296 0.21890-0.62529-0.95490 0.66495
   3   5  -2  305.74    9.41   0-0.27437 0.47580 0.19320 0.14674-0.95702 0.89034
   3   6  -2  154.85   11.12   0-0.26265 0.46358 0.21419 0.19317-0.95535 0.88679
   3   9  -4   28.21    8.73   0-0.26448 0.46289 0.21094 0.40128-0.95565 0.81058
   3  10  -5   -2.93    9.04   0-0.26292 0.46026 0.21372 0.47060-0.95540 0.77223
   3  11  -6   12.37   10.25   0-0.26292 0.45549 0.21372 0.53254-0.95540 0.73202
   4  -8 -14    4.78   10.09   0-0.26292 0.51384 0.21372-0.75531-0.95540 0.44243
   4  -7 -11    7.75    7.30   0-0.27311 0.52911 0.19548-0.66854-0.95687 0.55738
   4   1  -3  113.28    9.93   0-0.27584 0.54672 0.19053-0.12171-0.95719 0.85788
   4   5  -3  120.34    8.91   0-0.27184 0.54064 0.19777 0.14184-0.95671 0.85588
   4   7  -4    2.38    6.96   0-0.27479 0.54165 0.19243 0.28248-0.95707 0.81717
   4   9  -5    6.31    9.24   0-0.26219 0.52694 0.21502 0.39638-0.95527 0.77543
   4  10  -6    3.28    8.83   0-0.26292 0.52448 0.21372 0.46309-0.95540 0.73733
   4  11  -8    1.42    7.44   0-0.27374 0.53105 0.19434 0.55382-0.95695 0.66359
   5  -7 -13    7.65    7.11   0-0.27184 0.59303 0.19777-0.67044-0.95671 0.48495
   5  -6 -11  115.53   13.03   0-0.26374 0.58922 0.21225-0.61870-0.95553 0.55742
   5  -1  -5    1.84   11.14   0-0.25966 0.59579 0.21950-0.28705-0.95484 0.78398
   5   2  -4   71.08    8.72   0-0.27184 0.60846 0.19777-0.06149-0.95671 0.82351
   5   3  -4   27.50    7.87   0-0.27479 0.61195 0.19243 0.01136-0.95707 0.82261
   5   4  -4   -1.30    7.19   0-0.27099 0.60801 0.19929 0.07214-0.95660 0.82164
   5   5  -4    6.43    9.84   0-0.26332 0.60062 0.21302 0.12633-0.95546 0.81957
   5   7  -5   16.51    7.17   0-0.26675 0.60165 0.20689 0.26853-0.95600 0.78105
   5   8  -6   -8.95    7.30   0-0.27311 0.60484 0.19548 0.34805-0.95687 0.74445
   5   9  -7   31.18    7.29   0-0.27416 0.60534 0.19358 0.41757-0.95700 0.70515
   5  10  -8    0.75    7.35   0-0.27120 0.59811 0.19891 0.48111-0.95662 0.66741
   6  -7 -16    0.74   10.42   0-0.26207 0.64816 0.21523-0.68611-0.95525 0.37411
   6   0  -6   92.49   11.88   0-0.26548 0.66852 0.20917-0.20803-0.95580 0.75120
   6   6  -6    1.72    7.11   0-0.26760 0.66903 0.20537 0.20230-0.95612 0.74822
   6   7  -7    0.72    6.98   0-0.27689 0.67606 0.18862 0.28731-0.95731 0.71108
   6   8  -7   12.64    9.01   0-0.26111 0.66040 0.21693 0.32666-0.95509 0.70746
   6   9  -8  -15.38   10.03   0-0.26249 0.65818 0.21448 0.39714-0.95533 0.67005
   7   2  -7   69.61    9.48   0-0.26335 0.73315 0.21296-0.07649-0.95547 0.71520
   7   3  -7   73.10    8.55   0-0.26654 0.73645 0.20727-0.00284-0.95596 0.71532
   7   4  -7   27.76    9.77   0-0.26441 0.73355 0.21106 0.06119-0.95564 0.71487
   7   6  -8    1.81    6.90   0-0.27205 0.73873 0.19738 0.21109-0.95673 0.67678
   7   8  -9   13.16   10.23   0-0.26320 0.72798 0.21322 0.33069-0.95544 0.63537
   7   9 -10   -0.44   10.70   0-0.26249 0.72338 0.21448 0.39797-0.95533 0.59797
   8   0 -10   68.92   11.28   0-0.26803 0.80257 0.20461-0.20315-0.95618 0.60585
   8   2  -9    2.92    9.75   0-0.26182 0.79691 0.21567-0.07910-0.95521 0.64199
   8   3  -9   -1.37    8.59   0-0.26377 0.79995 0.21220-0.00619-0.95553 0.64246
   8   4  -9    9.92    9.24   0-0.26290 0.79808 0.21375 0.05863-0.95539 0.64126
   8   6 -10    8.56    7.32   0-0.26803 0.80096 0.20461 0.20377-0.95618 0.60303
   8   7 -11   -1.61    7.17   0-0.27247 0.80201 0.19662 0.28084-0.95679 0.56635
   9   1 -12    6.15   10.71   0-0.26384 0.86280 0.21208-0.14285-0.95555 0.53269
   9   2 -12    5.04    8.08   0-0.27289 0.87179 0.19586-0.05875-0.95684 0.53350
   9   3 -12   -0.09    7.68   0-0.27479 0.87266 0.19243 0.01419-0.95707 0.53438
   9   4 -12    2.01    7.16   0-0.27163 0.86936 0.19815 0.07629-0.95668 0.53354
   9   5 -12    7.20   10.09   0-0.26352 0.86455 0.21266 0.12955-0.95549 0.52990
 -12   1  -4   -5.53   11.51   0-0.24620-0.59276 0.24255-0.17335-0.95203 0.75425
 -11   0  -3   -3.48    7.52   0-0.25281-0.51470 0.23107-0.23027-0.95344 0.79809
 -10  -5  -7   -4.50    9.85   0-0.24588-0.45767 0.24311-0.58083-0.95196 0.65020
 -10  -4  -5    2.87    6.91   0-0.25883-0.44147 0.22050-0.49093-0.95459 0.72859
 -10  -3  -4    0.67    6.53   0-0.25668-0.44210 0.22428-0.42718-0.95420 0.76589
 -10   0  -2  138.06   11.14   0-0.24987-0.44633 0.23619-0.23486-0.95284 0.83944
  -9  -6  -7   -2.50    7.20   0-0.25496-0.37935 0.22730-0.63313-0.95387 0.65641
  -9  -5  -6    2.53    8.70   0-0.24327-0.39135 0.24762-0.58382-0.95135 0.69212
  -9  -4  -4   -2.81    6.63   0-0.25904-0.36971 0.22012-0.49091-0.95463 0.77038
  -9  -3  -3    3.50    7.06   0-0.25840-0.37082 0.22126-0.42208-0.95451 0.80832
  -9   0  -1   10.33    6.54   0-0.25668-0.36822 0.22428-0.22174-0.95420 0.88300
  -8  -7  -8    3.54    7.00   0-0.25259-0.31669 0.23145-0.70275-0.95340 0.62266
  -8  -6  -6    0.84    6.69   0-0.25625-0.30650 0.22504-0.63110-0.95412 0.69839
  -8  -5  -5    1.89    8.94   0-0.24544-0.31834 0.24387-0.58042-0.95186 0.73438
  -8  -1  -1   23.65    8.85   0-0.24732-0.30735 0.24061-0.30640-0.95228 0.88479
  -8   1   0   23.80    7.01   0-0.25302-0.30045 0.23070-0.16174-0.95349 0.92338
  -8   6   0   15.71   13.31   0-0.23864-0.31495 0.25556 0.15293-0.95022 0.91758
  -8   8  -1    3.45    9.83   0-0.24576-0.31244 0.24332 0.30250-0.95193 0.88072
  -7  -8 -10   -2.64    8.52   0-0.24446-0.25768 0.24556-0.78838-0.95163 0.54802
  -7  -8  -9    0.62    6.91   0-0.25754-0.24134 0.22277-0.76362-0.95436 0.58911
  -7  -7  -7    3.87    7.22   0-0.25625-0.24169 0.22504-0.69684-0.95412 0.66513
  -7  -5  -4    8.84    6.68   0-0.25367-0.23874 0.22957-0.56661-0.95362 0.77787
  -7  -4  -3    3.82    8.58   0-0.24761-0.24292 0.24011-0.50945-0.95235 0.81414
  -7  -3  -2   10.34    9.68   0-0.24653-0.24154 0.24199-0.44373-0.95210 0.85131
  -7  -2  -1  100.49    7.59   0-0.25388-0.23167 0.22919-0.36348-0.95366 0.89069
  -7   0   0   -1.90   10.15   0-0.24392-0.24039 0.24649-0.24745-0.95151 0.92576
  -7   9  -1   -1.25    8.72   0-0.24261-0.24667 0.24874 0.36072-0.95120 0.88283
  -7  10  -2    6.19    9.55   0-0.24836-0.24327 0.23882 0.44341-0.95251 0.84581
  -6  -9 -11    3.41    7.18   0-0.25582-0.17759 0.22579-0.83386-0.95403 0.51693
  -6  -8  -9    4.40    8.19   0-0.24654-0.18488 0.24197-0.77991-0.95211 0.59155
  -6  -7  -7   13.69    9.68   0-0.24557-0.18325 0.24365-0.71614-0.95189 0.66676
  -6  -6  -5   14.04    6.98   0-0.25151-0.17331 0.23334-0.63812-0.95318 0.74353
  -6  -1   0   39.21    7.75   0-0.25108-0.16383 0.23409-0.30036-0.95309 0.93130
  -6   8   0  138.67   11.73   0-0.24563-0.17063 0.24355 0.29987-0.95190 0.92625
  -5  -9 -11    7.05    7.10   0-0.24913-0.11808 0.23748-0.84463-0.95268 0.52005
  -5  -8  -8    2.23    6.83   0-0.25711-0.10116 0.22353-0.76477-0.95428 0.63462
  -5  -7  -6    6.86    6.77   0-0.25840-0.09900 0.22126-0.69400-0.95451 0.71107
  -5  -4  -2  144.01    8.62   0-0.25711-0.09194 0.22353-0.49301-0.95428 0.86204
  -5  -3  -1  451.37   11.47   0-0.25990-0.08734 0.21861-0.42011-0.95478 0.89990
  -4  -9 -11   11.42    9.60   0-0.24533-0.05256 0.24406-0.85182-0.95183 0.52297
  -4  -9 -10    5.48    6.81   0-0.25947-0.03636 0.21937-0.82684-0.95471 0.56379
  -4  -8  -8    8.81    6.97   0-0.25345-0.03857 0.22994-0.77043-0.95357 0.63831
  -4  -7  -6   -9.52    6.78   0-0.25453-0.03063 0.22806-0.70193-0.95379 0.71345
  -4  -5  -3   41.64    7.27   0-0.25647-0.02528 0.22466-0.56152-0.95416 0.82817
  -4  -4  -2    9.19    7.17   0-0.25173-0.02877 0.23296-0.50320-0.95322 0.86416
  -4  -3  -1   19.14    7.81   0-0.25453-0.02437 0.22806-0.42997-0.95379 0.90270
  -4  10  -1   43.46   10.57   0-0.24544-0.03485 0.24387 0.43470-0.95186 0.89388
  -4  11  -2    5.12    9.44   0-0.24501-0.03861 0.24462 0.50439-0.95176 0.85600
  -3  -9 -11   -9.14    9.95   0-0.24490 0.01928 0.24480-0.85387-0.95173 0.52615
  -3  -9 -10    1.54    7.23   0-0.25947 0.03586 0.21937-0.82755-0.95471 0.56700
  -3  -8  -8   18.41    7.39   0-0.25302 0.03036 0.23070-0.77112-0.95349 0.64189
  -3  -7  -6   66.10    7.86   0-0.25453 0.03624 0.22806-0.70104-0.95379 0.71786
  -3  -5  -3    4.74    6.82   0-0.25733 0.04429 0.22315-0.56127-0.95432 0.83143
  -3  -4  -2  812.08   13.33   0-0.25216 0.04076 0.23221-0.50180-0.95331 0.86835
  -3  -3  -1  339.00   11.59   0-0.25561 0.04578 0.22617-0.42788-0.95399 0.90672
  -3  10  -1   58.33   10.13   0-0.24506 0.03291 0.24452 0.43496-0.95177 0.89736
  -3  11  -2    6.54    9.51   0-0.24609 0.03201 0.24274 0.50534-0.95201 0.85937
  -2  -9 -11    4.38    8.86   0-0.24651 0.08734 0.24203-0.84918-0.95210 0.53084
  -2  -8  -8    7.89    6.92   0-0.25711 0.10372 0.22353-0.76439-0.95428 0.64646
  -2  -7  -6  137.48    8.22   0-0.25969 0.11079 0.21899-0.69240-0.95474 0.72279
  -2   6   1   98.26    8.39   0-0.25259 0.11390 0.23145 0.17620-0.95340 0.98119
  -2   8   0   78.70    7.55   0-0.25668 0.11622 0.22428 0.31932-0.95420 0.94311
  -1  -9 -11    3.81    6.68   0-0.25388 0.16385 0.22919-0.83734-0.95366 0.53597
  -1  -8  -9   15.81    8.69   0-0.24469 0.15857 0.24516-0.78750-0.95169 0.60909
  -1  -6  -5   42.77    7.66   0-0.25173 0.17359 0.23296-0.63895-0.95322 0.76233
  -1   2   1  244.25   17.03   0-0.25539 0.18647 0.22655-0.08965-0.95395 0.98759
  -1   5   1  534.71   12.90   0-0.25108 0.18163 0.23409 0.10605-0.95309 0.98518
  -1   8   0   39.62    9.76   0-0.24535 0.17355 0.24402 0.29966-0.95184 0.94391
  -1   9  -1   43.82    7.52   0-0.25733 0.18349 0.22315 0.38810-0.95432 0.90887
  -1  12  -4   11.31    6.67   0-0.25496 0.17513 0.22730 0.58936-0.95387 0.79257
   0  -9 -12   -0.89    7.13   0-0.24848 0.22819 0.23861-0.84597-0.95254 0.50037
   0  -8  -9  -10.80    7.20   0-0.25690 0.24257 0.22390-0.76444-0.95424 0.61552
   0  -7  -7    4.18    7.09   0-0.25690 0.24394 0.22390-0.69743-0.95424 0.69140
   0  -5  -4  329.47   11.20   0-0.25647 0.24892 0.22466-0.56260-0.95416 0.80487
   0  -4  -3  285.52   14.56   0-0.24728 0.24116 0.24070-0.51080-0.95227 0.84078
   0  -3  -2  315.37   17.85   0-0.24779 0.24303 0.23981-0.44193-0.95238 0.87861
   0   7   0   -0.92    6.52   0-0.24891 0.24691 0.23785 0.23613-0.95263 0.94994
   0   9  -1   25.94    9.20   0-0.24502 0.24051 0.24460 0.36465-0.95176 0.90841
   0  10  -2    5.19    6.79   0-0.24891 0.24285 0.23785 0.44200-0.95263 0.87195
   0  11  -3   15.33    7.38   0-0.24891 0.24062 0.23785 0.51028-0.95263 0.83351
   0  12  -4    7.44    9.82   0-0.24544 0.23468 0.24387 0.57131-0.95186 0.79358
   1  -9 -13    2.36    8.34   0-0.24848 0.29300 0.23861-0.84687-0.95254 0.46628
   1  -8 -10    7.61    7.13   0-0.25281 0.30317 0.23107-0.77187-0.95344 0.58075
   1  -7  -8   51.03    7.97   0-0.24913 0.30400 0.23748-0.71109-0.95268 0.65518
   1  -6  -6   67.55    7.48   0-0.25904 0.31708 0.22012-0.62619-0.95463 0.73330
   1   2   0   50.06   12.73   0-0.26011 0.32718 0.21823-0.08207-0.95482 0.95821
   1   5   0    9.92    7.80   0-0.25432 0.32259 0.22843 0.11089-0.95374 0.95510
   1   8  -1   45.45    9.84   0-0.24668 0.31110 0.24172 0.30210-0.95214 0.91413
   1   9  -2    5.32    6.49   0-0.25625 0.31976 0.22504 0.38687-0.95412 0.87779
   1  10  -3    2.73    6.84   0-0.25969 0.31956 0.21899 0.45977-0.95474 0.84087
   1  11  -4    1.62    7.39   0-0.25797 0.31533 0.22201 0.52498-0.95444 0.80216
   1  12  -5   -3.06    7.61   0-0.25237 0.30718 0.23183 0.58337-0.95336 0.76263
   2  -9 -14    9.64    7.43   0-0.25345 0.36509 0.22994-0.83775-0.95357 0.43301
   2  -8 -11   16.80    7.39   0-0.25496 0.37312 0.22730-0.76828-0.95387 0.54625
   2  -7  -9   27.18    9.62   0-0.24736 0.36891 0.24054-0.71312-0.95229 0.62120
   2  -6  -7   67.88    7.93   0-0.25432 0.37990 0.22843-0.63446-0.95374 0.69791
   2   6  -1   89.17    7.89   0-0.25539 0.38935 0.22655 0.18088-0.95395 0.92128
   2   8  -2    3.07    7.04   0-0.25604 0.38889 0.22541 0.31797-0.95408 0.88171
   2  12  -6   -5.30    7.33   0-0.25518 0.37738 0.22692 0.58878-0.95391 0.72909
   3  -8 -13   13.11    9.54   0-0.24399 0.42763 0.24637-0.78881-0.95152 0.47147
   3  -7 -10   10.02    6.49   0-0.25539 0.44455 0.22655-0.69999-0.95395 0.58838
   3   7  -2   47.20   10.16   0-0.24588 0.44664 0.24311 0.23197-0.95196 0.88491
   3   8  -3    7.88    7.44   0-0.25904 0.45921 0.22012 0.32343-0.95463 0.84807
   3  10  -4   -0.52    8.58   0-0.24436 0.43970 0.24574 0.43109-0.95161 0.80674
   4  -8 -15   -0.74    9.22   0-0.24305 0.49405 0.24799-0.78919-0.95130 0.39944
   4  -7 -12   -1.32    9.14   0-0.24348 0.50020 0.24724-0.72080-0.95140 0.51316
   4  -5  -8  164.56   12.38   0-0.24270 0.50474 0.24859-0.58724-0.95122 0.66432
   4   6  -3    3.56    7.65   0-0.25969 0.52941 0.21899 0.18834-0.95474 0.85277
   4   7  -3   56.40   10.47   0-0.24588 0.51409 0.24311 0.23251-0.95196 0.85000
   4   8  -4  108.71    7.87   0-0.25711 0.52346 0.22353 0.32002-0.95428 0.81381
   4  11  -7   -5.81    7.65   0-0.25690 0.51619 0.22390 0.52410-0.95424 0.69935
   5  -7 -14    3.00    9.50   0-0.24196 0.56123 0.24987-0.72290-0.95104 0.44059
   5  -4  -8   18.14   11.91   0-0.24041 0.57148 0.25253-0.52335-0.95066 0.66681
   5   1  -4   17.11    7.86   0-0.25754 0.59552 0.22277-0.15488-0.95436 0.82048
   5   6  -4   10.52    7.26   0-0.25281 0.58963 0.23107 0.17620-0.95344 0.81712
   5   8  -5   -5.07    6.95   0-0.25021 0.58383 0.23559 0.30773-0.95291 0.77873
   5   9  -6    6.69    6.78   0-0.25432 0.58675 0.22843 0.38341-0.95374 0.74014
   5  10  -7   11.77    7.24   0-0.25388 0.58385 0.22919 0.45061-0.95366 0.70144
   6   2  -5    1.43    6.79   0-0.24935 0.65426 0.23710-0.10072-0.95272 0.78450
   6   3  -5    5.70    6.59   0-0.25582 0.66065 0.22579-0.02210-0.95403 0.78494
   6   4  -5    6.25    7.20   0-0.25496 0.65951 0.22730 0.04428-0.95387 0.78427
   6   5  -5    6.24    7.09   0-0.24935 0.65383 0.23710 0.10245-0.95272 0.78270
   6   7  -6   17.66    7.01   0-0.25432 0.65621 0.22843 0.24730-0.95374 0.74471
   6   9  -7    2.79    8.99   0-0.24544 0.64239 0.24387 0.36480-0.95186 0.70394
   6  10  -9   -8.27    7.52   0-0.25861 0.65280 0.22088 0.45978-0.95455 0.63155
   6  10  -8    3.11    9.02   0-0.24414 0.63831 0.24612 0.43188-0.95156 0.66629
   7  -5 -14    0.60   11.85   0-0.23893 0.69740 0.25506-0.59344-0.95029 0.44589
   7  -4 -12    1.54   14.95   0-0.22696 0.68929 0.27533-0.54598-0.94703 0.51867
   7   1  -7   12.87    9.31   0-0.24828 0.72006 0.23896-0.17038-0.95249 0.71205
   7   5  -7    2.22    7.35   0-0.25818 0.72712 0.22164 0.11878-0.95447 0.71300
   7   6  -7   -0.06    6.81   0-0.24935 0.71774 0.23710 0.17103-0.95272 0.71080
   7   7  -8    1.64    7.61   0-0.25926 0.72518 0.21975 0.25650-0.95467 0.67435
   7   8  -8    1.86    9.97   0-0.24544 0.71160 0.24387 0.29946-0.95186 0.66977
   7   9  -9   -7.33   10.39   0-0.24588 0.70965 0.24311 0.36970-0.95196 0.63313
   8   1  -9    3.68    9.08   0-0.24649 0.78424 0.24206-0.17351-0.95210 0.63881
   8   5  -9    2.96    7.59   0-0.25711 0.79198 0.22353 0.11666-0.95428 0.63966
   8   6  -9   -0.79    6.51   0-0.24870 0.78216 0.23823 0.17058-0.95258 0.63854
   8   7 -10   -0.64    7.53   0-0.25582 0.78725 0.22579 0.25136-0.95403 0.60171
   9  -1 -13    7.34   11.49   0-0.24427 0.84048 0.24588-0.31217-0.95159 0.49130
   9   0 -12   -2.11    9.36   0-0.24370 0.84093 0.24687-0.24372-0.95145 0.53056
   9   2 -11   -0.14   10.47   0-0.24544 0.84717 0.24387-0.10715-0.95186 0.56639
   9   3 -11   23.53    8.00   0-0.25216 0.85281 0.23221-0.02793-0.95331 0.56682
   9   4 -11    4.11    7.27   0-0.25151 0.85189 0.23334 0.03926-0.95318 0.56675
   9   5 -11   16.10    9.46   0-0.24644 0.84771 0.24215 0.09894-0.95208 0.56471
   9   6 -12    0.35    8.06   0-0.25647 0.85333 0.22466 0.18536-0.95416 0.53012
  10   2 -14    4.45   11.65   0-0.24544 0.90751 0.24387-0.10653-0.95186 0.45587
 -12   0  -5   -6.79    9.09   0-0.22907-0.60960 0.27139-0.26979-0.94760 0.71252
 -12   2  -4   -1.54    9.23   0-0.22995-0.60752 0.26991-0.13291-0.94785 0.74983
 -11  -3  -6   -1.73    7.25   0-0.23787-0.53443 0.25648-0.45864-0.94998 0.68194
 -11  -2  -5   -3.86    7.24   0-0.23568-0.53478 0.26022-0.39459-0.94942 0.71892
 -11  -1  -4   -2.14    7.21   0-0.23984-0.52910 0.25312-0.31984-0.95048 0.75769
 -11   1  -3   -1.13    8.65   0-0.22774-0.53536 0.27362-0.20250-0.94722 0.79087
 -10  -5  -8  -13.11    9.82   0-0.22807-0.47741 0.27306-0.61073-0.94731 0.60745
 -10  -4  -6    2.92    6.63   0-0.23656-0.46767 0.25873-0.52628-0.94964 0.68612
 -10  -3  -5   -3.26    8.32   0-0.22918-0.46934 0.27121-0.47322-0.94763 0.72117
 -10  -2  -4   -4.50   10.04   0-0.22840-0.46990 0.27251-0.40743-0.94741 0.75841
 -10  -1  -3   10.00    8.40   0-0.23414-0.46441 0.26283-0.32731-0.94901 0.79820
 -10   1  -2    9.65    9.38   0-0.22717-0.46964 0.27457-0.20378-0.94705 0.83344
  -9  -6  -8   -7.42    7.07   0-0.23743-0.39875 0.25723-0.66272-0.94987 0.61427
  -9  -4  -5   -1.08    6.79   0-0.23392-0.39687 0.26320-0.53374-0.94895 0.72670
  -9  -3  -4    2.01    9.43   0-0.22807-0.40047 0.27306-0.47600-0.94731 0.76247
  -9  -2  -3    7.76    9.56   0-0.22796-0.40065 0.27325-0.40614-0.94728 0.80044
  -9  -1  -2    2.79    7.14   0-0.23634-0.39109 0.25910-0.32417-0.94959 0.84063
  -9   1  -1    0.62    9.15   0-0.22774-0.39436 0.27362-0.20358-0.94722 0.87460
  -9   7  -1   -0.21   12.69   0-0.21007-0.41806 0.30288 0.17248-0.94156 0.86734
  -8  -7  -9    0.09    6.64   0-0.23678-0.33176 0.25835-0.73150-0.94970 0.58019
  -8  -6  -7    6.75    6.91   0-0.23656-0.33083 0.25873-0.66240-0.94964 0.65641
  -8  -4  -4    5.31    6.65   0-0.23699-0.32459 0.25798-0.52654-0.94976 0.76970
  -8  -3  -3   48.84    7.41   0-0.23326-0.32491 0.26432-0.46682-0.94877 0.80612
  -8  -2  -2   90.43    8.37   0-0.23590-0.32021 0.25985-0.39485-0.94947 0.84463
  -8   2   0   80.35   10.39   0-0.22690-0.32701 0.27502-0.13871-0.94697 0.91656
  -7  -8 -11   -0.50    8.63   0-0.22874-0.27256 0.27195-0.81064-0.94751 0.50645
  -7  -7  -8   -7.62    6.90   0-0.23853-0.25871 0.25536-0.72897-0.95015 0.62247
  -7  -6  -6    2.48    8.06   0-0.24094-0.25244 0.25125-0.65738-0.95075 0.69869
  -7  -5  -5   25.19   10.00   0-0.22750-0.26650 0.27403-0.61084-0.94715 0.73319
  -6  -8 -10    1.79    7.16   0-0.23238-0.19931 0.26581-0.80665-0.94853 0.54890
  -6  -7  -8   -2.55    9.22   0-0.22708-0.20092 0.27474-0.74925-0.94702 0.62318
  -6  -6  -6   -1.31    9.78   0-0.22818-0.19889 0.27288-0.67775-0.94735 0.69970
  -6  -5  -4    1.02    6.97   0-0.23962-0.18054 0.25349-0.59217-0.95043 0.77766
  -6  -4  -3   32.75    7.36   0-0.23172-0.18825 0.26693-0.53731-0.94835 0.81368
  -6  -3  -2  187.78   11.00   0-0.22816-0.19004 0.27291-0.47532-0.94734 0.85015
  -6  -2  -1   15.32    7.50   0-0.23304-0.18363 0.26469-0.39859-0.94871 0.88956
  -6   2   1   94.05   12.10   0-0.22723-0.18659 0.27449-0.13799-0.94707 0.96201
  -6   6   1   65.50   11.42   0-0.22927-0.18480 0.27106 0.13685-0.94766 0.96111
  -6  10  -1   20.35    8.96   0-0.22648-0.19149 0.27573 0.40240-0.94685 0.88144
  -6  11  -2    6.41   10.48   0-0.22723-0.19455 0.27448 0.47482-0.94707 0.84405
  -5  -9 -12    0.43    7.24   0-0.23656-0.12977 0.25873-0.86690-0.94964 0.47816
  -5  -8  -9   10.26    6.93   0-0.23984-0.12356 0.25312-0.79307-0.95048 0.59326
  -5  -7  -7    8.41    6.49   0-0.23699-0.12254 0.25798-0.73061-0.94976 0.66818
  -5  -6  -5   19.61    7.03   0-0.24268-0.11221 0.24825-0.65377-0.95117 0.74488
  -5  -5  -4   31.37   10.03   0-0.22898-0.12367 0.27153-0.60906-0.94758 0.77904
  -5  -1   0   -2.42    8.39   0-0.23172-0.11256 0.26693-0.33553-0.94835 0.92979
  -5   1   1   68.92   12.81   0-0.23155-0.11301 0.26720-0.19808-0.94830 0.96729
  -5   7   1   40.12    9.38   0-0.22742-0.11803 0.27415 0.20134-0.94713 0.96348
  -5   9   0    8.47    9.38   0-0.22767-0.11968 0.27374 0.33807-0.94720 0.92377
  -5  10  -1   -0.96    7.77   0-0.23743-0.11439 0.25723 0.42180-0.94987 0.88959
  -5  11  -2    4.38    7.45   0-0.23984-0.11236 0.25312 0.49593-0.95048 0.85095
  -4  -9 -12   -3.99    6.80   0-0.23172-0.06533 0.26693-0.87488-0.94835 0.48064
  -4  -8  -9    9.68    7.17   0-0.23502-0.05908 0.26134-0.80145-0.94924 0.59572
  -4  -7  -7   10.32    6.64   0-0.23172-0.05852 0.26693-0.73979-0.94835 0.67046
  -4  -6  -5   -0.22    7.07   0-0.23743-0.04604 0.25723-0.66363-0.94987 0.74699
  -4   7   1    1.01    6.93   0-0.23743-0.03946 0.25723 0.21711-0.94987 0.97051
  -4   9   0  161.36    9.47   0-0.23392-0.04476 0.26320 0.34787-0.94895 0.93064
  -3  -9 -12  -13.34    8.80   0-0.22896 0.00186 0.27158-0.87756-0.94757 0.48420
  -3  -8  -9    7.06    6.78   0-0.23370 0.00885 0.26358-0.80400-0.94889 0.59909
  -3  -7  -7   49.92    9.36   0-0.22995 0.01058 0.26991-0.74288-0.94785 0.67348
  -3  -6  -5  261.39    9.52   0-0.23634 0.02057 0.25910-0.66478-0.94959 0.75086
  -3   7   1  331.96   11.00   0-0.23809 0.02990 0.25611 0.21948-0.95004 0.97398
  -3   9   0   23.57    7.46   0-0.23480 0.02497 0.26171 0.35004-0.94918 0.93422
  -3  12  -3   -2.93    7.41   0-0.24137 0.02319 0.25050 0.56483-0.95086 0.82143
  -2  -9 -12    1.19    7.39   0-0.23216 0.07343 0.26618-0.87449-0.94847 0.48842
  -2  -8  -9    9.12    6.87   0-0.23612 0.08055 0.25947-0.79986-0.94953 0.60341
  -2  -7  -7   -5.19    6.75   0-0.23348 0.08455 0.26395-0.73791-0.94883 0.67792
  -2  -6  -5   23.34    7.61   0-0.24050 0.09330 0.25200-0.65724-0.95064 0.75605
  -2   7   1   23.81    6.89   0-0.23150 0.09233 0.26730 0.20788-0.94828 0.97599
  -2   9   0   94.02    9.93   0-0.23017 0.08919 0.26953 0.34171-0.94791 0.93680
  -2  10  -1   13.54    7.46   0-0.23962 0.09741 0.25349 0.42645-0.95043 0.90043
  -2  11  -2    3.90    6.95   0-0.24137 0.09694 0.25050 0.49786-0.95086 0.86256
  -2  12  -3    5.26    6.99   0-0.23787 0.09122 0.25648 0.56027-0.94998 0.82336
  -1  -9 -12    2.63    6.62   0-0.23787 0.14828 0.25648-0.86443-0.94998 0.49373
  -1  -7  -7   17.82    7.11   0-0.24137 0.15997 0.25050-0.72313-0.95086 0.68447
  -1  -5  -4   17.88    7.66   0-0.23524 0.15900 0.26097-0.59906-0.94930 0.79617
  -1   6   1  126.02    8.75   0-0.23612 0.16579 0.25947 0.14826-0.94953 0.98145
  -1  10  -1  112.02    9.56   0-0.23085 0.15686 0.26839 0.41101-0.94810 0.90242
  -1  11  -2    7.89    6.75   0-0.23370 0.15853 0.26358 0.48453-0.94889 0.86432
  -1  12  -3    0.97    6.56   0-0.23128 0.15187 0.26767 0.54734-0.94822 0.82632
   0  -9 -13   -1.25    6.97   0-0.23304 0.21050 0.26469-0.87243-0.94871 0.45833
   0  -8 -10   10.69    7.21   0-0.23480 0.21570 0.26171-0.80276-0.94918 0.57253
   0  -7  -8   12.10    9.07   0-0.22790 0.21287 0.27335-0.74663-0.94726 0.64609
   0  -6  -6  105.78    7.65   0-0.23304 0.22253 0.26469-0.67062-0.94871 0.72328
   0   4   1   70.56   13.80   0-0.22919 0.22854 0.27118 0.00063-0.94764 0.98438
   0   5   1    3.51   10.56   0-0.22530 0.22629 0.27770 0.06180-0.94650 0.98240
   0   8   0   62.94   10.22   0-0.22895 0.22626 0.27160 0.27168-0.94757 0.94434
   1  -9 -14   -1.13    7.40   0-0.23282 0.27725 0.26507-0.87234-0.94865 0.42415
   1  -8 -11    1.95    8.69   0-0.22774 0.27544 0.27362-0.81052-0.94722 0.53719
   1  -5  -5   -0.50    8.06   0-0.23831 0.30027 0.25574-0.59419-0.95010 0.76555
   1   6   0   10.08    7.20   0-0.24137 0.30966 0.25050 0.15688-0.95086 0.95196
   1   7   0  100.20   10.71   0-0.22745 0.29378 0.27411 0.20101-0.94713 0.94749
   1   9  -1   33.69    8.72   0-0.22635 0.29118 0.27595 0.33448-0.94681 0.90824
   1  10  -2   11.97    6.67   0-0.23304 0.29654 0.26469 0.41481-0.94871 0.87193
   1  11  -3   13.63    7.14   0-0.23436 0.29571 0.26246 0.48541-0.94907 0.83394
   1  12  -4    8.08    7.19   0-0.23128 0.29042 0.26767 0.54840-0.94822 0.79464
   2  -9 -15    5.96    7.44   0-0.23853 0.34786 0.25536-0.86344-0.95015 0.39125
   2  -8 -12   12.18    7.20   0-0.23304 0.34842 0.26469-0.80587-0.94871 0.50344
   2  -5  -6   38.68   10.55   0-0.22737 0.35406 0.27425-0.61242-0.94711 0.72946
   2   7  -1   26.55    7.48   0-0.24006 0.37461 0.25274 0.22252-0.95053 0.91724
   2   9  -2   28.75    7.36   0-0.23546 0.36758 0.26059 0.35094-0.94936 0.87711
   2  10  -3   16.06    7.19   0-0.24050 0.37130 0.25200 0.42768-0.95064 0.83968
   2  11  -4    5.93    7.22   0-0.24050 0.36902 0.25200 0.49570-0.95064 0.80112
   2  12  -5    3.23    7.09   0-0.23634 0.36084 0.25910 0.55595-0.94959 0.76287
   3  -7 -11   32.31    9.66   0-0.22518 0.41187 0.27791-0.75213-0.94646 0.54224
   3  -5  -7    8.37   10.91   0-0.22749 0.42207 0.27405-0.61314-0.94714 0.69438
   3   0  -2    2.83    9.75   0-0.23326 0.43700 0.26432-0.26463-0.94877 0.88388
   3   3  -1  799.26   14.88   0-0.23128 0.43453 0.26767-0.06329-0.94822 0.92092
   3   4  -1   35.26    8.30   0-0.23436 0.43762 0.26246 0.00871-0.94907 0.92123
   3   5  -1  396.81   10.14   0-0.23061 0.43352 0.26879 0.07127-0.94804 0.91974
   3   8  -2   25.93    8.92   0-0.22995 0.43125 0.26991 0.27370-0.94785 0.87952
   3   9  -3   55.41    7.17   0-0.23962 0.43864 0.25349 0.35821-0.95043 0.84376
   3  11  -5   -2.32    7.24   0-0.24181 0.43606 0.24975 0.49732-0.95096 0.76840
   4  -8 -16    1.86    9.40   0-0.22530 0.47402 0.27770-0.81927-0.94650 0.35631
   4  -6 -10    4.81    9.03   0-0.23107 0.48851 0.26803-0.67393-0.94817 0.58559
   4   0  -3   -0.54    9.12   0-0.23458 0.50589 0.26208-0.26204-0.94912 0.84989
   4   3  -2  115.30    9.39   0-0.23414 0.50478 0.26283-0.05850-0.94901 0.88757
   4   4  -2  857.94   13.69   0-0.23656 0.50699 0.25873 0.01353-0.94964 0.88770
   4   5  -2  332.12    9.95   0-0.23260 0.50287 0.26544 0.07473-0.94859 0.88628
   4   8  -3    7.19    8.76   0-0.23017 0.49981 0.26953 0.27365-0.94791 0.84522
   4   9  -4    6.08    6.65   0-0.23853 0.50586 0.25536 0.35588-0.95015 0.80891
   4  10  -5    5.35    7.30   0-0.24116 0.50620 0.25087 0.42844-0.95080 0.77104
   4  11  -6   -2.21    7.44   0-0.23897 0.50055 0.25462 0.49280-0.95026 0.73352
   5   3  -3  432.45   14.05   0-0.22774 0.56565 0.27363-0.06931-0.94722 0.85146
   5   4  -3  362.58   10.25   0-0.23083 0.56867 0.26842 0.00390-0.94810 0.85185
   5   5  -3  167.53   11.12   0-0.22818 0.56558 0.27289 0.06702-0.94735 0.85058
   5   7  -4   -1.71    7.30   0-0.23984 0.57598 0.25312 0.22182-0.95048 0.81471
   5   8  -4    8.50    8.32   0-0.22693 0.56216 0.27498 0.26656-0.94698 0.80972
   5   9  -5    9.37    7.14   0-0.23282 0.56763 0.26507 0.34645-0.94865 0.77330
   5  10  -6   11.10    7.03   0-0.23502 0.56738 0.26134 0.41810-0.94924 0.73526
   5  11  -7   -7.70    7.28   0-0.23282 0.56140 0.26507 0.48226-0.94865 0.69747
   6  -6 -14    2.18   10.43   0-0.22929 0.61750 0.27102-0.67701-0.94766 0.44034
   6   1  -5   71.17   10.73   0-0.23061 0.63484 0.26879-0.19971-0.94804 0.78112
   6   6  -5   -9.30    6.87   0-0.24050 0.64420 0.25200 0.15540-0.95064 0.78104
   6   7  -5   19.23    9.13   0-0.22966 0.63398 0.27039 0.20502-0.94777 0.77684
   6   8  -6    9.31    7.20   0-0.23962 0.64156 0.25349 0.28981-0.95043 0.74104
   6  10  -7   -0.39    8.96   0-0.22652 0.62300 0.27566 0.40209-0.94686 0.69982
   7  -2  -9   70.91   13.12   0-0.22967 0.69749 0.27038-0.40478-0.94777 0.63184
   7  -1  -8   -0.19    9.66   0-0.22774 0.69750 0.27362-0.34155-0.94722 0.66973
   7   3  -6    4.46    7.50   0-0.23150 0.70375 0.26730-0.06386-0.94828 0.74491
   7   4  -6   -8.00    6.85   0-0.23392 0.70513 0.26320 0.00870-0.94895 0.74577
   7   5  -6    5.03    7.31   0-0.23105 0.70281 0.26805 0.07123-0.94816 0.74385
   7   7  -7   12.04    6.85   0-0.23787 0.70749 0.25648 0.21905-0.94998 0.70687
   7   8  -7   -2.61    9.44   0-0.22641 0.69241 0.27585 0.26639-0.94683 0.70424
   7   9  -8   -1.55    9.09   0-0.22774 0.69641 0.27362 0.34077-0.94722 0.66480
   8  -1 -10   46.28   11.94   0-0.22623 0.75945 0.27616-0.34323-0.94678 0.59617
   8   2  -8   13.93    9.24   0-0.22744 0.76378 0.27412-0.13789-0.94713 0.67201
   8   3  -8    1.87    6.82   0-0.23524 0.77182 0.26097-0.05627-0.94930 0.67441
   8   4  -8    8.29    7.13   0-0.23700 0.77400 0.25798 0.01357-0.94976 0.67354
   8   5  -8    6.52    7.45   0-0.23370 0.77075 0.26358 0.07597-0.94889 0.67229
   8   6  -8   16.37    9.64   0-0.22788 0.76397 0.27339 0.13385-0.94726 0.66999
   8   7  -9    7.98    7.22   0-0.23787 0.77245 0.25648 0.21915-0.94998 0.63445
   8   8 -10    0.17    7.57   0-0.24247 0.77338 0.24863 0.29576-0.95112 0.59835
   8   8  -9   -8.97    8.80   0-0.22663 0.75771 0.27548 0.26750-0.94689 0.63237
   9  -2 -14    0.23   11.08   0-0.21348 0.81031 0.29730-0.43232-0.94273 0.44387
   9   1 -11   12.10    9.69   0-0.23216 0.83245 0.26618-0.19765-0.94847 0.56376
   9   3 -10   -3.47    9.48   0-0.22730 0.82849 0.27436-0.06890-0.94709 0.60014
   9   4 -10   -2.88    9.96   0-0.22863 0.83076 0.27214 0.00134-0.94747 0.60040
   9   5 -10   -5.62   10.05   0-0.22752 0.82814 0.27399 0.06707-0.94715 0.59942
   9   6 -11   -2.50    7.76   0-0.23962 0.83871 0.25349 0.15569-0.95043 0.56438
  10   1 -14    2.58   11.67   0-0.22907 0.89290 0.27139-0.20267-0.94760 0.45204
  10   3 -13   -2.05   10.17   0-0.22774 0.89492 0.27362-0.06874-0.94722 0.48915
 -11  -3  -7    1.16    7.51   0-0.21652-0.55754 0.29201-0.49435-0.94362 0.63769
 -11  -2  -6   12.08   10.50   0-0.20997-0.56295 0.30275-0.43458-0.94140 0.67333
 -11  -1  -5   -0.68    9.45   0-0.20957-0.56095 0.30341-0.37042-0.94126 0.71058
 -11   0  -4    2.54    7.22   0-0.21563-0.55413 0.29348-0.28981-0.94332 0.75067
 -11   2  -3   -2.21    9.08   0-0.21193-0.55405 0.29955-0.16322-0.94208 0.78619
 -10  -5  -9   -3.30    8.92   0-0.21070-0.49490 0.30157-0.63835-0.94165 0.56421
 -10  -4  -7   -1.18    6.78   0-0.21585-0.48812 0.29311-0.56339-0.94340 0.64144
 -10   0  -3   -5.61    9.29   0-0.20822-0.49097 0.30561-0.30546-0.94078 0.78966
 -10   2  -2    3.55    8.48   0-0.20349-0.49319 0.31329-0.17474-0.93907 0.82534
  -9  -6  -9   -7.45    7.37   0-0.22143-0.41656 0.28388-0.68965-0.94519 0.57160
  -9  -5  -7    2.21    7.18   0-0.22276-0.41130 0.28166-0.61984-0.94560 0.64767
  -9  -4  -6    8.10    8.86   0-0.21043-0.42428 0.30200-0.57025-0.94156 0.68189
  -9   0  -2    9.36    8.19   0-0.20729-0.42146 0.30712-0.30483-0.94045 0.83162
  -9   2  -1   63.86   10.24   0-0.20489-0.41945 0.31102-0.17533-0.93958 0.86777
  -8  -7 -11    1.47    9.54   0-0.20890-0.36571 0.30451-0.77617-0.94102 0.49597
  -8  -7 -10    2.99    7.34   0-0.22232-0.34803 0.28240-0.75588-0.94546 0.53791
  -8  -6  -8   -2.22    7.06   0-0.21831-0.34815 0.28906-0.69498-0.94420 0.61232
  -8  -5  -6    3.95    6.87   0-0.22232-0.34299 0.28240-0.61883-0.94546 0.68989
  -8  -4  -5   27.92    9.33   0-0.21013-0.35254 0.30249-0.57139-0.94146 0.72358
  -8   0  -1    1.66    6.89   0-0.21563-0.34042 0.29348-0.29128-0.94332 0.87587
  -7  -7  -9    5.34    6.57   0-0.22187-0.27996 0.28314-0.75505-0.94533 0.58019
  -7  -6  -7   -3.05    6.84   0-0.22009-0.27495 0.28610-0.69221-0.94477 0.65461
  -7  -4  -4    7.79    6.80   0-0.21652-0.27549 0.29201-0.56104-0.94362 0.76730
  -7  -3  -3   47.07    9.74   0-0.20998-0.27942 0.30274-0.50452-0.94140 0.80314
  -7  -2  -2   35.91    9.63   0-0.20936-0.27869 0.30375-0.43800-0.94119 0.84059
  -7  -1  -1  158.15    8.89   0-0.21719-0.26861 0.29090-0.35726-0.94384 0.88060
  -7   8   0    0.19    9.69   0-0.21036-0.27724 0.30212 0.24096-0.94154 0.91288
  -6  -8 -11    5.89    6.94   0-0.21853-0.21797 0.28869-0.82836-0.94427 0.50719
  -6  -7  -9    4.66    9.59   0-0.20980-0.22336 0.30304-0.77630-0.94134 0.58011
  -6  -5  -5    7.34    8.67   0-0.21041-0.21224 0.30203-0.63742-0.94155 0.73130
  -6   0   0  197.89   12.99   0-0.20850-0.20664 0.30516-0.30386-0.94088 0.91917
  -6   9   0    3.20    8.96   0-0.20980-0.20657 0.30304 0.30896-0.94134 0.91453
  -5  -8 -11    6.64    9.21   0-0.20952-0.15746 0.30350-0.84382-0.94124 0.50774
  -5  -8 -10    1.79    6.90   0-0.22388-0.13822 0.27981-0.82086-0.94594 0.54991
  -5  -7  -8   22.36    6.60   0-0.21697-0.14401 0.29127-0.76420-0.94376 0.62382
  -5  -6  -6    2.20    6.86   0-0.21742-0.13703 0.29053-0.69682-0.94391 0.69917
  -5  -4  -3   43.54    7.23   0-0.21853-0.13267 0.28869-0.55872-0.94427 0.81325
  -5  -3  -2   59.59    7.99   0-0.21294-0.13657 0.29790-0.49942-0.94242 0.84955
  -5  -2  -1  194.53   10.06   0-0.21518-0.13254 0.29422-0.42800-0.94318 0.88784
  -4  -9 -14   -6.27   10.13   0-0.20935-0.09145 0.30377-0.91272-0.94118 0.39719
  -4  -9 -13    4.17    7.23   0-0.21965-0.08222 0.28684-0.89431-0.94463 0.43926
  -4  -8 -10   15.05    7.30   0-0.21831-0.07764 0.28906-0.82942-0.94420 0.55251
  -4  -7  -8  130.86   10.56   0-0.21020-0.08020 0.30237-0.77568-0.94148 0.62484
  -4  -6  -6  208.00   11.49   0-0.21021-0.07692 0.30237-0.70783-0.94148 0.70076
  -4  -5  -4   51.44    7.51   0-0.22210-0.06196 0.28277-0.62022-0.94539 0.78085
  -4  -4  -3   17.62    9.94   0-0.20977-0.07220 0.30308-0.57313-0.94133 0.81428
  -4  -1   0  395.69   13.20   0-0.21764-0.05955 0.29016-0.35603-0.94398 0.92997
  -4   8   1  102.53   10.22   0-0.21066-0.06530 0.30162 0.24164-0.94164 0.96200
  -4  11  -1   -5.42    9.60   0-0.21002-0.07326 0.30267 0.44452-0.94142 0.88522
  -3  -9 -13    1.30    6.95   0-0.21742-0.01230 0.29053-0.89880-0.94391 0.44181
  -3  -8 -10    2.65    6.96   0-0.21585-0.00788 0.29311-0.83413-0.94340 0.55490
  -3  -7  -8    0.13    8.53   0-0.20867-0.01161 0.30487-0.78061-0.94094 0.62768
  -3  -6  -6   30.50    9.37   0-0.20755-0.01122 0.30670-0.71246-0.94054 0.70394
  -3  -5  -4   58.73    7.20   0-0.21987 0.00533 0.28647-0.62356-0.94470 0.78440
  -3  -1   0  319.78   17.77   0-0.21249 0.00426 0.29863-0.36445-0.94227 0.93213
  -3   8   1    7.10    9.09   0-0.21323 0.00594 0.29742 0.24710-0.94252 0.96652
  -3  10   0   10.07    8.92   0-0.20798-0.00113 0.30600 0.37208-0.94070 0.92474
  -3  11  -1   10.86    9.28   0-0.21247 0.00051 0.29867 0.45046-0.94226 0.88904
  -3  12  -2    4.88    8.87   0-0.21178-0.00269 0.29979 0.51867-0.94203 0.85072
  -2  -9 -13   10.99    7.09   0-0.21831 0.05491 0.28906-0.89701-0.94420 0.44622
  -2  -8 -10   42.08    7.02   0-0.21742 0.06176 0.29053-0.83164-0.94391 0.55929
  -2  -7  -8   99.84   10.21   0-0.20938 0.05698 0.30371-0.77789-0.94119 0.63249
  -2  -6  -6   37.26   10.46   0-0.20971 0.06063 0.30319-0.70900-0.94131 0.70895
  -2  -5  -4  886.37   13.10   0-0.22365 0.07779 0.28018-0.61795-0.94587 0.78901
  -2  -4  -3  103.49   11.96   0-0.20957 0.06532 0.30341-0.57326-0.94126 0.82240
  -2  -1   0 4862.51   43.19   0-0.22343 0.08389 0.28055-0.34651-0.94580 0.93944
  -2   8   1  108.89   10.27   0-0.21019 0.07190 0.30239 0.24084-0.94148 0.96894
  -2  11  -1   53.06    9.82   0-0.21076 0.06847 0.30146 0.44608-0.94168 0.89215
  -2  12  -2   -1.87    9.43   0-0.21047 0.06336 0.30194 0.51366-0.94157 0.85482
  -1  -9 -14    1.22    9.42   0-0.20980 0.11411 0.30304-0.91051-0.94134 0.40881
  -1  -9 -13   -1.44    6.87   0-0.22343 0.13196 0.28055-0.88868-0.94580 0.45130
  -1  -8 -10   -1.87    6.97   0-0.22343 0.13793 0.28055-0.82162-0.94580 0.56486
  -1  -7  -8    3.47    6.76   0-0.21540 0.13109 0.29385-0.76757-0.94325 0.63826
  -1  -6  -6  103.62    7.84   0-0.21742 0.13741 0.29053-0.69646-0.94391 0.71492
  -1  -4  -3  192.56   10.20   0-0.22143 0.14596 0.28388-0.55373-0.94519 0.82979
  -1  -3  -2  196.69   11.64   0-0.21428 0.14062 0.29569-0.49765-0.94288 0.86519
  -1  -2  -1  561.53   17.47   0-0.22076 0.14854 0.28499-0.41906-0.94498 0.90490
  -1   7   1  100.35    7.41   0-0.21920 0.14963 0.28758 0.18827-0.94448 0.97609
  -1   9   0   54.99    7.49   0-0.22076 0.15020 0.28499 0.32648-0.94498 0.93787
   0  -9 -14    0.24    7.57   0-0.21920 0.19479 0.28758-0.89572-0.94448 0.41583
   0  -8 -11    0.26    6.83   0-0.21451 0.19605 0.29532-0.83602-0.94295 0.52783
   0  -5  -5   17.72   11.21   0-0.20934 0.20020 0.30378-0.64285-0.94118 0.75309
   0   3   1   -1.64   12.32   0-0.22276 0.22446 0.28166-0.07948-0.94560 0.98230
   0   6   1  123.25    8.66   0-0.21563 0.21516 0.29348 0.11414-0.94332 0.97924
   0   9   0   -4.64    9.43   0-0.20901 0.20592 0.30432 0.30499-0.94106 0.93755
   0  10  -1   26.26    7.04   0-0.21898 0.21495 0.28795 0.39165-0.94441 0.90234
   0  11  -2    6.55    7.09   0-0.22276 0.21668 0.28166 0.46617-0.94560 0.86510
   0  12  -3    6.06    7.26   0-0.22143 0.21311 0.28388 0.53207-0.94519 0.82622
   1  -9 -16   -3.89    9.01   0-0.20867 0.24966 0.30487-0.91429-0.94094 0.33913
   1  -9 -15   -0.43    7.96   0-0.21920 0.26169 0.28758-0.89498-0.94448 0.38170
   1  -8 -12   -5.84    9.50   0-0.21025 0.25889 0.30230-0.84224-0.94150 0.49212
   1  -7  -9   48.10    7.63   0-0.22009 0.27282 0.28610-0.75969-0.94477 0.60930
   1  -6  -7  119.54    7.83   0-0.21965 0.27592 0.28684-0.69292-0.94463 0.68463
   1  -4  -4  145.63   10.35   0-0.21898 0.27992 0.28795-0.55855-0.94441 0.79833
   1   1   0  992.36   26.06   0-0.21697 0.28454 0.29127-0.22262-0.94376 0.94773
   1   8   0   28.73    9.81   0-0.21018 0.27763 0.30241 0.24088-0.94147 0.94189
   1  11  -2    1.82   10.01   0-0.20935 0.27060 0.30377 0.44248-0.94118 0.86526
   1  12  -3   -8.66    9.41   0-0.20935 0.26803 0.30377 0.51049-0.94118 0.82678
   2  -8 -13    2.22    8.95   0-0.21294 0.32632 0.29790-0.83901-0.94242 0.45879
   2  -7 -10   56.58    7.99   0-0.21831 0.33863 0.28906-0.76305-0.94420 0.57350
   2  -6  -8  127.43    8.74   0-0.21361 0.33705 0.29679-0.70319-0.94265 0.64819
   2   3   0 1363.26   19.38   0-0.21496 0.35121 0.29458-0.09050-0.94310 0.94989
   2   4   0   77.20    9.35   0-0.22165 0.35762 0.28351-0.01204-0.94526 0.95158
   2   5   0  611.93   11.96   0-0.21942 0.35541 0.28721 0.05261-0.94456 0.95047
   2   6   0  110.62    9.95   0-0.21227 0.34807 0.29900 0.10835-0.94219 0.94766
   2   8  -1   94.94    8.12   0-0.22343 0.35747 0.28055 0.26292-0.94580 0.91211
   2  10  -2    0.51    7.06   0-0.21451 0.34570 0.29532 0.38302-0.94295 0.87118
   2  11  -3    2.75    7.36   0-0.21742 0.34620 0.29053 0.45616-0.94391 0.83392
   2  12  -4    7.74    7.40   0-0.21585 0.34392 0.29311 0.52252-0.94340 0.79376
   3  -8 -14    6.14    7.35   0-0.22254 0.40318 0.28203-0.82332-0.94553 0.42757
   3  -6  -9   17.23    7.05   0-0.21652 0.40693 0.29201-0.69868-0.94362 0.61466
   3   2  -1    4.36   10.55   0-0.21540 0.42071 0.29385-0.15847-0.94325 0.91549
   3   6  -1    3.07    7.11   0-0.22254 0.42707 0.28203 0.12507-0.94553 0.91611
   3   7  -1  335.91   12.01   0-0.21131 0.41454 0.30056 0.17473-0.94187 0.91267
   3   9  -2   36.32    8.79   0-0.21204 0.41354 0.29937 0.31231-0.94212 0.87383
   3  10  -3   11.33    7.21   0-0.21920 0.41897 0.28758 0.39182-0.94448 0.83745
   3  11  -4   -7.89    7.27   0-0.22076 0.41676 0.28499 0.46184-0.94498 0.80068
   3  12  -5   15.24    7.79   0-0.21786 0.41329 0.28979 0.52617-0.94405 0.76029
   4  -7 -13    2.95    8.93   0-0.21294 0.46456 0.29790-0.77146-0.94242 0.46576
   4   2  -2 1492.65   19.52   0-0.22098 0.49204 0.28462-0.14859-0.94505 0.88387
   4   6  -2  145.99    9.00   0-0.22499 0.49572 0.27796 0.13056-0.94627 0.88282
   4   7  -2    4.80    7.05   0-0.21428 0.48587 0.29569 0.17939-0.94288 0.87876
   4   9  -3    4.90    6.74   0-0.21361 0.48272 0.29679 0.31432-0.94265 0.83963
   4  10  -4    6.97    7.47   0-0.21898 0.48603 0.28795 0.39156-0.94441 0.80314
   4  11  -5   19.11    7.50   0-0.21965 0.48443 0.28684 0.46078-0.94463 0.76487
   5  -7 -15    4.71    7.93   0-0.21585 0.53267 0.29311-0.76654-0.94340 0.39439
   5  -6 -12   11.22    7.88   0-0.21965 0.54231 0.28684-0.69330-0.94463 0.50913
   5  -5 -10   -2.98    9.91   0-0.21002 0.53802 0.30267-0.63988-0.94142 0.58212
   5   0  -4    1.59    8.06   0-0.21607 0.55410 0.29274-0.29307-0.94347 0.80984
   5   2  -3  222.49   10.35   0-0.21428 0.55287 0.29569-0.15970-0.94288 0.84732
   5   6  -3  214.00    9.05   0-0.22098 0.55895 0.28462 0.12280-0.94505 0.84771
   5   7  -3   13.40   10.10   0-0.21029 0.54985 0.30223 0.17376-0.94151 0.84377
   5   9  -4    0.53    9.43   0-0.20957 0.54608 0.30341 0.30849-0.94126 0.80444
   5  10  -5    7.64    6.84   0-0.21473 0.54892 0.29495 0.38445-0.94303 0.76736
   5  11  -6   -3.32    7.61   0-0.21496 0.54520 0.29458 0.45247-0.94310 0.73012
   6  -5 -12   38.14   10.59   0-0.20521 0.59809 0.31050-0.65004-0.93970 0.50616
   6  -4 -10   51.85   14.54   0-0.19978 0.59535 0.31927-0.59101-0.93767 0.58055
   6   3  -4  306.69    9.79   0-0.21339 0.61907 0.29716-0.09352-0.94257 0.81236
   6   4  -4    1.76    6.79   0-0.21831 0.62438 0.28906-0.01758-0.94420 0.81320
   6   5  -4  120.05    8.27   0-0.21742 0.62281 0.29053 0.04862-0.94391 0.81252
   6   6  -4   -2.20    8.74   0-0.21092 0.61738 0.30120 0.10700-0.94173 0.81026
   6   8  -5    6.35    7.36   0-0.21675 0.62061 0.29164 0.25167-0.94369 0.77256
   6   9  -6   14.56    7.20   0-0.22365 0.62517 0.28018 0.33121-0.94587 0.73625
   7   0  -7  101.29    9.30   0-0.21697 0.68711 0.29127-0.29082-0.94376 0.70402
   7   2  -6    2.34    6.73   0-0.22165 0.69367 0.28351-0.14799-0.94526 0.74215
   7   6  -6   10.49    6.47   0-0.22454 0.69592 0.27870 0.12864-0.94614 0.74145
   7   7  -6   10.32    7.45   0-0.21518 0.68654 0.29422 0.18117-0.94318 0.73816
   7   9  -7   -6.95   10.15   0-0.21070 0.67940 0.30157 0.30979-0.94165 0.69768
   8  -4 -15    5.13   15.97   0-0.18396 0.70816 0.34441-0.61467-0.93123 0.39195
   8  -2 -11   22.45   12.79   0-0.20323 0.73523 0.31370-0.44972-0.93897 0.55012
   8   0  -9   -0.66    7.72   0-0.21876 0.75435 0.28832-0.28677-0.94434 0.63260
   8   1  -8    2.69    9.00   0-0.20897 0.74357 0.30439-0.23657-0.94105 0.66633
   8   4  -7    4.25    9.82   0-0.20845 0.74738 0.30524-0.03357-0.94086 0.70271
   8   5  -7   -3.34    9.58   0-0.20924 0.74619 0.30396 0.03602-0.94114 0.70322
   8   7  -8   13.27    6.59   0-0.21831 0.75458 0.28906 0.18641-0.94420 0.66672
   8   8  -8  -13.61    9.28   0-0.20845 0.74126 0.30524 0.23740-0.94086 0.66421
   9   2 -10    1.03    6.97   0-0.21719 0.81906 0.29090-0.15341-0.94384 0.59721
   9   6 -10    3.89    7.69   0-0.22165 0.82318 0.28351 0.12419-0.94526 0.59582
   9   7 -10    4.40    7.44   0-0.21339 0.81459 0.29716 0.17842-0.94257 0.59268
  10   2 -13   12.45    8.52   0-0.22098 0.88641 0.28462-0.14824-0.94505 0.48688
  10   3 -12    8.53   10.12   0-0.20857 0.87519 0.30504-0.10081-0.94091 0.52023
  10   4 -12    1.30    8.56   0-0.21114 0.87935 0.30084-0.02645-0.94181 0.52190
 -11  -3  -8   -5.91    7.51   0-0.19663-0.57894 0.32421-0.52633-0.93645 0.59198
 -11   1  -4   -4.10    9.86   0-0.19140-0.57809 0.33255-0.26384-0.93435 0.74077
 -11   3  -3    2.77    8.52   0-0.19395-0.57246 0.32849-0.12166-0.93538 0.77934
 -10  -4  -8   -1.47    7.08   0-0.19686-0.50898 0.32384-0.59415-0.93654 0.59618
 -10  -3  -6   -1.64    6.85   0-0.20592-0.49601 0.30926-0.51189-0.93995 0.67529
 -10  -2  -5    1.31    7.32   0-0.20026-0.50040 0.31838-0.45347-0.93785 0.71102
 -10  -1  -4   -6.85    7.29   0-0.19936-0.49954 0.31984-0.38711-0.93751 0.74830
  -9  -6 -10    7.51    6.95   0-0.20637-0.43570 0.30853-0.71176-0.94012 0.52872
  -9  -5  -8    2.85    7.39   0-0.20434-0.43174 0.31182-0.65017-0.93938 0.60310
  -9  -4  -7   -4.57    8.44   0-0.19026-0.44610 0.33435-0.60644-0.93388 0.63518
  -9  -3  -5    4.14    7.02   0-0.20072-0.43191 0.31766-0.51823-0.93802 0.71568
  -9  -2  -4    4.45    7.05   0-0.19504-0.43564 0.32675-0.45951-0.93582 0.75108
  -9  -1  -3    6.95    7.00   0-0.19550-0.43336 0.32602-0.39105-0.93600 0.78892
  -8  -6  -9   -3.23    6.86   0-0.20140-0.36679 0.31656-0.72242-0.93828 0.56796
  -8  -5  -7    6.09    6.97   0-0.20117-0.36605 0.31693-0.65340-0.93820 0.64430
  -8  -3  -4    6.78    7.08   0-0.20140-0.36001 0.31656-0.51763-0.93828 0.75769
  -8  -2  -3   49.32    7.30   0-0.19709-0.36153 0.32348-0.45743-0.93663 0.79361
  -8  -1  -2   52.88    7.81   0-0.20026-0.35613 0.31838-0.38467-0.93785 0.83275
  -8   3   0   43.10   10.90   0-0.19288-0.36067 0.33019-0.12609-0.93495 0.90395
  -8   7   0   12.90   11.70   0-0.17994-0.37354 0.35059 0.12626-0.92946 0.89712
  -8   9  -1   -1.20    9.28   0-0.19334-0.36647 0.32947 0.28247-0.93514 0.86447
  -7  -7 -11    3.87    9.19   0-0.19254-0.31305 0.33074-0.80237-0.93481 0.49322
  -7  -7 -10    0.54    7.00   0-0.20637-0.29414 0.30853-0.78190-0.94012 0.53582
  -7  -6  -8    2.67    7.14   0-0.20094-0.29596 0.31729-0.72349-0.93811 0.60959
  -7  -5  -6    2.94    7.16   0-0.20298-0.29267 0.31401-0.65060-0.93887 0.68659
  -7   1   0    1.72    7.49   0-0.20343-0.28139 0.31328-0.24355-0.93904 0.91277
  -7  10  -1   -1.19    8.71   0-0.19413-0.29773 0.32820 0.35282-0.93546 0.86833
  -6  -8 -13    2.89    7.03   0-0.19436-0.24283 0.32784-0.86859-0.93555 0.42129
  -6  -8 -12    4.16    7.05   0-0.20592-0.23236 0.30926-0.84905-0.93995 0.46443
  -6  -7 -10    3.36    9.54   0-0.19163-0.24166 0.33218-0.80289-0.93444 0.53427
  -6  -6  -7   27.79    7.04   0-0.20569-0.22199 0.30962-0.71471-0.93987 0.65337
  -6  -4  -4   -1.11    7.33   0-0.19845-0.22183 0.32130-0.59271-0.93716 0.76381
  -6   7   1   14.22    9.39   0-0.19800-0.21638 0.32202 0.15455-0.93698 0.95029
  -5  -8 -12    5.64    6.95   0-0.19595-0.17301 0.32530-0.86511-0.93618 0.46434
  -5  -7  -9   -0.92    6.51   0-0.19845-0.16166 0.32130-0.79512-0.93716 0.57845
  -5  -6  -7   93.27    9.38   0-0.19383-0.16389 0.32869-0.73376-0.93533 0.65286
  -5  -5  -5   81.36    8.02   0-0.19936-0.15540 0.31984-0.65760-0.93751 0.73077
  -5   8   1   36.45    7.29   0-0.19754-0.14730 0.32275 0.22102-0.93680 0.95373
  -5  10   0    3.23   10.03   0-0.19246-0.15549 0.33086 0.34997-0.93478 0.91244
  -5  11  -1    1.32    7.16   0-0.20162-0.15078 0.31620 0.43104-0.93837 0.87823
  -4  -8 -11   -4.33    7.20   0-0.20298-0.09176 0.31401-0.85530-0.93887 0.50826
  -4  -7  -9    7.04    9.46   0-0.19094-0.10279 0.33327-0.80646-0.93416 0.57969
  -4  -5  -5   10.70    9.05   0-0.19056-0.09599 0.33387-0.67258-0.93401 0.73080
  -4  -3  -2  250.42    9.63   0-0.20208-0.07851 0.31547-0.51725-0.93854 0.84934
  -4  -2  -1  292.02   11.28   0-0.20208-0.07701 0.31547-0.44918-0.93854 0.88693
  -4   1   1   63.92   14.39   0-0.19636-0.07906 0.32464-0.25503-0.93634 0.95933
  -4  10   0   28.70    7.23   0-0.20253-0.07558 0.31474 0.36580-0.93871 0.92039
  -3  -9 -14    2.35    7.42   0-0.20614-0.02539 0.30889-0.91753-0.94004 0.39954
  -3  -8 -11    6.39    6.76   0-0.19936-0.02911 0.31984-0.86024-0.93751 0.51110
  -3  -4  -3  963.78   13.78   0-0.20592-0.00752 0.30926-0.57889-0.93995 0.81681
  -3  -3  -2   64.72    9.12   0-0.19641-0.01528 0.32457-0.52634-0.93636 0.85082
  -3  -2  -1  256.51   12.17   0-0.19527-0.01480 0.32638-0.46023-0.93591 0.88798
  -3   5   2  318.41   14.03   0-0.19208-0.01323 0.33146 0.00897-0.93463 0.99766
  -3   9   1   46.76   10.08   0-0.19060-0.01682 0.33381 0.27731-0.93402 0.95689
  -2  -9 -15   -3.08    7.37   0-0.19527 0.03086 0.32638-0.93437-0.93591 0.36125
  -2  -9 -14    1.71    7.08   0-0.20614 0.04379 0.30889-0.91701-0.94004 0.40336
  -2  -8 -11   -2.78    7.29   0-0.19981 0.04340 0.31911-0.86008-0.93768 0.51464
  -2  -3  -2  187.61   11.23   0-0.19913 0.05614 0.32021-0.52194-0.93742 0.85575
  -2  -2  -1  179.82   14.00   0-0.19913 0.05804 0.32021-0.45381-0.93742 0.89351
  -2   5   2   79.88   11.13   0-0.18943 0.05296 0.33566 0.00440-0.93354 0.99995
  -2  10   0    4.46    6.91   0-0.20388 0.06360 0.31255 0.36745-0.93921 0.92792
  -1  -9 -15   -0.72    6.75   0-0.19890 0.10358 0.32057-0.92883-0.93733 0.36651
  -1  -8 -11   32.27    7.05   0-0.20456 0.11486 0.31145-0.85256-0.93946 0.52037
  -1  -7  -9   -0.20    9.77   0-0.19140 0.10797 0.33255-0.80664-0.93435 0.59076
  -1  -5  -5   44.87   10.68   0-0.19208 0.11408 0.33146-0.66913-0.93463 0.74324
  -1   8   1   58.59    7.36   0-0.20072 0.13169 0.31766 0.22620-0.93802 0.96951
  -1  10   0   -4.44    6.75   0-0.19709 0.12453 0.32348 0.35483-0.93663 0.92991
  -1  11  -1    5.88    7.08   0-0.20434 0.13104 0.31182 0.43621-0.93938 0.89349
  -1  12  -2   11.60    6.99   0-0.20524 0.12974 0.31036 0.50600-0.93971 0.85553
   0  -9 -16   -7.40    7.27   0-0.19573 0.16744 0.32566-0.93382-0.93609 0.33113
   0  -9 -15   -7.22    7.25   0-0.20659 0.18033 0.30816-0.91622-0.94020 0.37323
   0  -8 -12   23.05    7.15   0-0.19595 0.17383 0.32530-0.86632-0.93618 0.48248
   0  -7  -9   42.62    7.05   0-0.20185 0.18514 0.31583-0.78972-0.93845 0.59889
   0  -6  -7    1.71    6.62   0-0.19800 0.18734 0.32202-0.72826-0.93698 0.67277
   0   2   1 1968.82   32.77   0-0.19083 0.19106 0.33345-0.19667-0.93412 0.97168
   0   7   1   26.31    6.96   0-0.20298 0.20338 0.31401 0.16072-0.93887 0.97437
   0  11  -1    7.57    8.35   0-0.19353 0.18947 0.32916 0.42036-0.93522 0.89373
   0  12  -2   32.89    7.36   0-0.19641 0.19052 0.32457 0.49092-0.93636 0.85617
   1  -8 -13   -6.20    9.38   0-0.19231 0.23898 0.33110-0.87117-0.93472 0.44721
   1  -7 -10   52.09   10.12   0-0.19345 0.24446 0.32929-0.80335-0.93518 0.56072
   1  -3  -3  889.81   18.82   0-0.20366 0.26600 0.31291-0.51546-0.93913 0.83091
   1  -2  -2 2684.11   38.26   0-0.20072 0.26460 0.31766-0.45251-0.93802 0.86738
   1   4   1  574.50   13.66   0-0.19436 0.26329 0.32784-0.05575-0.93555 0.97616
   1   5   1    6.12    7.74   0-0.19663 0.26700 0.32421 0.01526-0.93645 0.97640
   1   6   1  142.21   11.00   0-0.19208 0.26100 0.33146 0.07610-0.93463 0.97446
   1   9   0   60.30    9.84   0-0.19208 0.25873 0.33146 0.27988-0.93463 0.93532
   1  10  -1   -2.65    6.51   0-0.20388 0.26785 0.31255 0.36587-0.93921 0.90208
   2  -8 -14   78.85    9.99   0-0.19514 0.30820 0.32660-0.86733-0.93586 0.41352
   2  -7 -11    9.58    9.97   0-0.19157 0.30905 0.33227-0.80619-0.93442 0.52618
   2  -4  -5    2.12    8.12   0-0.19777 0.32685 0.32239-0.59376-0.93689 0.75569
   2   2   0 9737.40   52.17   0-0.19157 0.32790 0.33228-0.19585-0.93442 0.94168
   2   7   0   90.29    7.98   0-0.20162 0.33756 0.31620 0.15914-0.93837 0.94348
   2   9  -1   17.81    6.87   0-0.20547 0.33984 0.30999 0.30178-0.93979 0.90573
   2  11  -2    9.31   10.33   0-0.19250 0.32488 0.33080 0.41708-0.93480 0.86230
   2  12  -3    7.21    8.91   0-0.19309 0.32342 0.32986 0.48716-0.93504 0.82420
   3  -8 -16    1.04    9.34   0-0.19163 0.36907 0.33218-0.87518-0.93444 0.34004
   3  -8 -15    3.70    7.29   0-0.20501 0.38377 0.31072-0.85209-0.93963 0.38338
   3  -7 -12    2.15    7.30   0-0.19754 0.38217 0.32275-0.79671-0.93680 0.49426
   3  -4  -6    3.81   10.64   0-0.18798 0.38378 0.33797-0.60930-0.93293 0.71773
   3   8  -1    6.54    6.87   0-0.19800 0.40224 0.32202 0.22127-0.93698 0.90719
   3  10  -2    0.78    8.96   0-0.19265 0.39357 0.33055 0.34975-0.93486 0.86767
   3  11  -3    6.22    7.01   0-0.19822 0.39774 0.32166 0.42578-0.93707 0.82996
   3  12  -4   -1.08    7.33   0-0.19800 0.39347 0.32202 0.49284-0.93698 0.79264
   4  -7 -14   -2.75    9.00   0-0.19026 0.44254 0.33435-0.80821-0.93388 0.41888
   4  -6 -11   25.60   10.01   0-0.19186 0.44823 0.33182-0.73871-0.93454 0.53267
   4  -4  -7   15.64   10.90   0-0.19527 0.45834 0.32639-0.59742-0.93591 0.68613
   4   5  -1  185.91   11.21   0-0.19157 0.46377 0.33228 0.00706-0.93442 0.90946
   4   8  -2   76.35    7.70   0-0.20140 0.47187 0.31656 0.22624-0.93828 0.87462
   4  10  -3    2.12    7.09   0-0.19573 0.46325 0.32566 0.35292-0.93609 0.83408
   4  11  -4   -4.32    7.11   0-0.19890 0.46410 0.32057 0.42635-0.93733 0.79712
   5  -7 -16   -1.21   11.04   0-0.19288 0.50894 0.33019-0.80166-0.93495 0.34876
   5   5  -2  106.85   10.77   0-0.19139 0.53100 0.33256 0.00639-0.93435 0.87454
   5   8  -3    4.19    6.87   0-0.19936 0.53787 0.31984 0.22322-0.93751 0.83895
   5  10  -4   12.60    8.80   0-0.19314 0.52930 0.32979 0.34956-0.93506 0.79772
   5  11  -5    1.81    7.50   0-0.19550 0.52794 0.32602 0.42113-0.93600 0.76156
   6  -6 -15    3.93   10.32   0-0.19264 0.57847 0.33058-0.73645-0.93485 0.38899
   6  -2  -7   -0.60   13.57   0-0.18156 0.58292 0.34805-0.48383-0.93018 0.68701
   6  -1  -6  195.71   14.06   0-0.19816 0.60125 0.32176-0.38925-0.93704 0.73218
   6   2  -4   54.72    7.56   0-0.19845 0.60437 0.32130-0.18568-0.93716 0.80749
   6   7  -4   61.39    7.77   0-0.20321 0.60867 0.31364 0.16137-0.93896 0.80710
   6   8  -4   -1.06    9.74   0-0.19197 0.59695 0.33164 0.21178-0.93458 0.80306
   6   9  -5    2.73    7.23   0-0.20230 0.60461 0.31510 0.29603-0.93862 0.76847
   6  10  -6   13.13    7.34   0-0.20637 0.60786 0.30853 0.37107-0.94012 0.73059
   7   1  -6    6.82    7.50   0-0.19800 0.67003 0.32202-0.25453-0.93698 0.73437
   7   3  -5   38.79    9.86   0-0.19314 0.66643 0.32978-0.12581-0.93506 0.77057
   7   4  -5    0.85    6.80   0-0.20072 0.67368 0.31766-0.04601-0.93802 0.77302
   7   5  -5   45.70    7.07   0-0.20140 0.67434 0.31656 0.02252-0.93828 0.77297
   7   6  -5   13.78    6.96   0-0.19800 0.67127 0.32202 0.08505-0.93698 0.77055
   7   7  -5   -8.45    9.23   0-0.19140 0.66289 0.33255 0.14257-0.93435 0.76833
   7   8  -6   36.18    7.62   0-0.20388 0.67513 0.31255 0.22951-0.93921 0.73435
   7   9  -6   -0.88    9.75   0-0.19163 0.66155 0.33218 0.27843-0.93444 0.72844
   8   2  -7   11.46    8.51   0-0.18956 0.72723 0.33547-0.20007-0.93359 0.69639
   8   3  -7   -0.69    6.84   0-0.20253 0.74112 0.31474-0.11037-0.93871 0.70199
   8   6  -7    4.06    6.62   0-0.20434 0.74285 0.31182 0.09546-0.93938 0.70064
   8   7  -7   -5.41    7.07   0-0.19709 0.73427 0.32348 0.15229-0.93663 0.69862
   9  -1 -12   10.63   10.83   0-0.18995 0.78808 0.33484-0.40269-0.93375 0.51146
   9   0 -11    0.68    7.52   0-0.19981 0.80041 0.31911-0.31725-0.93768 0.55407
   9   1 -10    1.35    8.81   0-0.19163 0.79779 0.33218-0.26424-0.93444 0.58657
   9   3  -9   12.70    7.17   0-0.19890 0.80324 0.32057-0.11702-0.93733 0.62739
   9   4  -9   -2.06    7.35   0-0.20524 0.80825 0.31036-0.03766-0.93971 0.63049
   9   5  -9    9.16    7.01   0-0.20569 0.80918 0.30962 0.02977-0.93987 0.62905
   9   6  -9   -4.55    7.09   0-0.20162 0.80420 0.31620 0.09224-0.93837 0.62853
   9   7  -9    5.50    7.00   0-0.19482 0.79828 0.32711 0.14830-0.93573 0.62426
  10   0 -14    2.91    9.42   0-0.19477 0.86073 0.32719-0.32695-0.93571 0.43980
  10   1 -13   -2.32    8.88   0-0.20162 0.86687 0.31620-0.24593-0.93837 0.48237
  10   2 -12    6.64    9.80   0-0.19349 0.86293 0.32922-0.19300-0.93520 0.51476
  10   4 -11    4.31    9.76   0-0.19208 0.86060 0.33146-0.05984-0.93463 0.55180
  10   5 -11    9.07   10.44   0-0.19267 0.86215 0.33053 0.00932-0.93487 0.55196
 -11  -2  -7    4.88    7.98   0-0.18740-0.58803 0.33859-0.47030-0.93262 0.62631
 -11  -1  -6    7.62    7.13   0-0.18213-0.59151 0.34687-0.41081-0.93036 0.66175
 -11   0  -5    2.34    6.85   0-0.18213-0.58944 0.34687-0.34296-0.93036 0.69935
 -11   4  -3    2.68    8.43   0-0.17415-0.59037 0.35928-0.08506-0.92677 0.76994
 -11   5  -3    1.44    9.93   0-0.17454-0.59469 0.35868-0.01516-0.92694 0.77073
 -10  -4  -9   -0.47    6.98   0-0.17937-0.52840 0.35117-0.62123-0.92914 0.55044
 -10  -3  -7   -4.31    6.86   0-0.18374-0.52030 0.34435-0.54683-0.93105 0.62814
 -10  -2  -6    4.59    9.22   0-0.17384-0.53030 0.35975-0.49192-0.92662 0.66204
 -10   1  -3   49.16    9.85   0-0.17646-0.52096 0.35570-0.28637-0.92782 0.77567
 -10   3  -2    2.31    8.63   0-0.17960-0.51725 0.35081-0.14385-0.92924 0.81503
  -9  -5 -10    0.94    8.10   0-0.17234-0.46881 0.36207-0.70106-0.92592 0.51259
  -9  -5  -9    4.80    7.09   0-0.18695-0.45332 0.33931-0.67489-0.93243 0.55845
  -9  -3  -6    3.61    8.39   0-0.17426-0.45881 0.35911-0.55900-0.92682 0.66638
  -9   1  -2    3.21    9.55   0-0.17153-0.45564 0.36332-0.29288-0.92555 0.81574
  -9   3  -1   24.41   10.44   0-0.17372-0.45101 0.35994-0.15572-0.92657 0.85378
  -8  -6 -11   -3.94    9.41   0-0.17269-0.39997 0.36154-0.76807-0.92609 0.47941
  -8  -6 -10    5.00    6.76   0-0.18603-0.38700 0.34075-0.74450-0.93204 0.52413
  -8  -5  -8    2.35    7.35   0-0.18144-0.38512 0.34794-0.68627-0.93005 0.59720
  -8  -4  -6    0.08    6.54   0-0.18534-0.37760 0.34183-0.61274-0.93175 0.67469
  -8  -3  -5    3.63    9.74   0-0.17315-0.39132 0.36082-0.56244-0.92630 0.70791
  -8   1  -1   14.32    8.72   0-0.17723-0.37810 0.35450-0.28446-0.92817 0.86031
  -7  -7 -12    3.89    6.84   0-0.17983-0.32780 0.35046-0.82192-0.92934 0.44943
  -7  -6  -9   -4.73    7.11   0-0.18305-0.31575 0.34543-0.75127-0.93076 0.56389
  -7  -5  -7   -5.77    7.12   0-0.18098-0.31444 0.34866-0.68749-0.92985 0.63885
  -7  -4  -5    4.32    6.70   0-0.18832-0.30594 0.33714-0.60648-0.93300 0.71837
  -7  -3  -4    1.93    8.63   0-0.17546-0.31672 0.35725-0.55857-0.92737 0.75031
  -7   0  -1  289.54   12.81   0-0.17319-0.31276 0.36077-0.35924-0.92632 0.86245
  -7   9   0   21.35   10.20   0-0.17307-0.31148 0.36095 0.25170-0.92626 0.89736
  -6  -7 -11   -1.71    6.68   0-0.17822-0.25522 0.35296-0.82647-0.92862 0.48982
  -6  -6  -8   10.33    6.67   0-0.18557-0.24498 0.34147-0.74621-0.93184 0.60743
  -6  -5  -6   62.34    7.80   0-0.18626-0.23906 0.34039-0.67779-0.93214 0.68383
  -6  -3  -3    1.55    6.39   0-0.18832-0.23048 0.33714-0.54105-0.93300 0.79725
  -6  -2  -2   81.89    7.73   0-0.18328-0.23509 0.34507-0.47908-0.93086 0.83364
  -6  -1  -1   -1.89    7.29   0-0.18695-0.22850 0.33931-0.40773-0.93243 0.87204
  -6   8   1   -2.87    9.69   0-0.17119-0.24445 0.36385 0.17853-0.92538 0.93788
  -6  10   0    8.15    9.50   0-0.17269-0.24429 0.36153 0.31934-0.92609 0.89995
  -6  11  -1    1.56    7.56   0-0.18466-0.23714 0.34291 0.40464-0.93145 0.86764
  -5  -8 -14    4.12    9.53   0-0.17324-0.19960 0.36069-0.90035-0.92634 0.37804
  -5  -8 -13   -1.66    7.03   0-0.18397-0.18405 0.34399-0.88481-0.93115 0.42041
  -5  -7 -10    7.53    6.99   0-0.18144-0.18374 0.34794-0.82044-0.93005 0.53364
  -5  -6  -8   -4.07    9.24   0-0.17292-0.18551 0.36118-0.76804-0.92619 0.60490
  -5  -5  -6   12.23    9.64   0-0.17225-0.18535 0.36222-0.70042-0.92588 0.68093
  -5  -4  -4    7.58    7.21   0-0.18282-0.17077 0.34579-0.61568-0.93066 0.76139
  -5   0   0   -0.73   11.47   0-0.17292-0.17303 0.36118-0.36001-0.92619 0.90759
  -5   9   1   -1.79    8.41   0-0.17315-0.17100 0.36082 0.24930-0.92630 0.94162
  -4  -8 -13    5.35    7.12   0-0.17615-0.12573 0.35618-0.89626-0.92768 0.42125
  -4  -8 -12    4.53    7.07   0-0.18878-0.11107 0.33642-0.87670-0.93320 0.46478
  -4  -7 -10   64.86    9.90   0-0.17307-0.12102 0.36095-0.83475-0.92626 0.53315
  -4  -6  -7   11.58    7.12   0-0.18557-0.10457 0.34147-0.74713-0.93184 0.65291
  -4   4   2  865.23   24.85   0-0.16486-0.10901 0.37354-0.10070-0.92234 0.98207
  -4   5   2  322.85   12.93   0-0.18052-0.09349 0.34938-0.00861-0.92965 0.98915
  -4   6   2  303.46   13.87   0-0.17606-0.09804 0.35633 0.05231-0.92764 0.98687
  -4   9   1   15.61    7.13   0-0.18374-0.09244 0.34435 0.26833-0.93105 0.95135
  -4  11   0   -4.66    9.72   0-0.17269-0.10843 0.36154 0.38510-0.92609 0.90768
  -3  -8 -13    7.10    8.92   0-0.17220-0.06070 0.36229-0.90434-0.92586 0.42239
  -3  -8 -12    4.87    6.74   0-0.18466-0.04599 0.34291-0.88355-0.93145 0.46676
  -3  -7  -9   40.76    7.15   0-0.18649-0.03738 0.34003-0.81339-0.93223 0.58128
  -3  -6  -7   78.10    7.86   0-0.18006-0.04023 0.35010-0.75511-0.92944 0.65462
  -3  -5  -5   95.92    8.44   0-0.18466-0.03167 0.34291-0.68015-0.93145 0.73270
  -3   4   2   28.28    8.82   0-0.18511-0.01978 0.34219-0.06919-0.93165 0.99521
  -3   6   2  148.99    9.29   0-0.18580-0.01954 0.34111 0.06742-0.93194 0.99472
  -3   7   2   45.99   10.12   0-0.17368-0.03088 0.36000 0.11581-0.92655 0.98916
  -3  11   0    9.90    7.21   0-0.17776-0.03194 0.35368 0.39471-0.92841 0.91340
  -3  12  -1   -1.86    7.38   0-0.18213-0.03219 0.34687 0.46830-0.93036 0.87783
  -2  -8 -12   -3.59    7.35   0-0.18420 0.02562 0.34363-0.88495-0.93125 0.46998
  -2  -7  -9   32.48    6.99   0-0.18649 0.03194 0.34003-0.81438-0.93223 0.58427
  -2  -6  -7   53.49    7.71   0-0.18006 0.02859 0.35010-0.75604-0.92944 0.65812
  -2  -5  -5   61.40    7.51   0-0.18488 0.03689 0.34255-0.68020-0.93155 0.73631
  -2   4   2  133.23   10.43   0-0.18190 0.04571 0.34723-0.07445-0.93026 0.99754
  -2   6   2   11.76    7.46   0-0.18374 0.04780 0.34435 0.06381-0.93105 0.99762
  -2   7   2  193.88   11.16   0-0.17348 0.03711 0.36031 0.11556-0.92646 0.99260
  -2   9   1   12.15    7.11   0-0.18786 0.04978 0.33787 0.27422-0.93281 0.96032
  -2  11   0   39.92    7.54   0-0.17730 0.03817 0.35439 0.39353-0.92821 0.91734
  -2  12  -1    8.80    7.32   0-0.18190 0.03916 0.34723 0.46926-0.93026 0.88075
  -1  -8 -13   50.16    9.56   0-0.17292 0.07934 0.36118-0.90313-0.92619 0.43040
  -1  -8 -12    3.07    6.37   0-0.18763 0.09543 0.33823-0.87946-0.93272 0.47546
  -1  -6  -7   11.32    7.04   0-0.18557 0.10318 0.34147-0.74805-0.93184 0.66405
  -1   5   2    9.33   10.87   0-0.17592 0.10950 0.35654-0.01662-0.92758 0.99837
  -1   6   2   22.25   10.70   0-0.17395 0.10692 0.35959 0.04862-0.92667 0.99713
  -1   9   1   27.04    6.84   0-0.18144 0.11235 0.34794 0.26279-0.93005 0.96160
  -1  11   0   43.07    9.70   0-0.17338 0.10229 0.36047 0.38572-0.92641 0.91914
  -1  12  -1   10.08    7.38   0-0.17776 0.10424 0.35368 0.46239-0.92841 0.88250
   0  -8 -13   12.73    7.05   0-0.17960 0.15457 0.35081-0.89202-0.92924 0.43767
   0  -7 -10   10.18    6.82   0-0.17753 0.15844 0.35404-0.82788-0.92831 0.55047
   0  -4  -4   67.02    9.11   0-0.18443 0.17653 0.34327-0.61353-0.93135 0.78139
   0   8   1   17.12    7.03   0-0.18740 0.18693 0.33859 0.20523-0.93262 0.96824
   0   9   1   23.38    8.87   0-0.17197 0.17202 0.36264 0.24742-0.92575 0.96006
   0  10   0   70.98    7.50   0-0.18649 0.18417 0.34003 0.33940-0.93223 0.92917
   0  12  -1   17.13    8.72   0-0.17172 0.16701 0.36304 0.45011-0.92563 0.88252
   1  -8 -14    2.18    6.82   0-0.17638 0.22086 0.35583-0.89614-0.92779 0.40212
   1  -6  -8    0.08    6.34   0-0.18397 0.24026 0.34399-0.75011-0.93115 0.63261
   1  -5  -6   87.76    8.30   0-0.18786 0.24516 0.33787-0.67636-0.93281 0.71069
   1   3   1   39.47   12.16   0-0.17891 0.24787 0.35189-0.14904-0.92893 0.97001
   1   7   1   -2.29    7.53   0-0.18282 0.25208 0.34579 0.12838-0.93066 0.97058
   1   8   1   71.00    9.32   0-0.17238 0.24141 0.36201 0.18050-0.92594 0.96407
   1  10   0   -1.66    9.19   0-0.17315 0.23883 0.36082 0.31746-0.92630 0.92743
   1  11  -1    0.74    7.27   0-0.18190 0.24532 0.34723 0.39920-0.93026 0.89309
   1  12  -2   22.75    6.98   0-0.18466 0.24850 0.34291 0.47305-0.93145 0.85470
   2  -8 -15   -5.81    6.89   0-0.17960 0.29110 0.35081-0.89128-0.92924 0.36946
   2  -6  -9    1.55    8.67   0-0.17611 0.29713 0.35624-0.76221-0.92767 0.59510
   2  -5  -7   35.99   10.91   0-0.17419 0.29948 0.35921-0.69785-0.92679 0.67011
   2   0  -1    2.98   13.09   0-0.18282 0.31934 0.34579-0.34613-0.93066 0.90007
   2   8   0   51.79    7.70   0-0.18832 0.32415 0.33714 0.20675-0.93300 0.93799
   2   9   0   82.58   10.11   0-0.17361 0.30965 0.36011 0.25117-0.92652 0.93092
   2  10  -1   34.56    7.37   0-0.18649 0.32056 0.34003 0.33894-0.93223 0.89844
   2  12  -2  -10.59    9.23   0-0.17176 0.30110 0.36296 0.44947-0.92565 0.85333
   3  -8 -17    4.64    8.50   0-0.17638 0.35085 0.35583-0.89704-0.92779 0.29526
   3  -7 -13    2.89    9.90   0-0.17362 0.35613 0.36010-0.83425-0.92652 0.44571
   3  -6 -10   59.88    7.81   0-0.17822 0.36731 0.35296-0.75978-0.92862 0.56072
   3  -5  -8   10.85   10.51   0-0.17109 0.36331 0.36400-0.70347-0.92534 0.63416
   3   1  -1 2087.40   28.60   0-0.17296 0.37674 0.36112-0.29283-0.92621 0.89956
   3   4   0   11.13    7.97   0-0.17914 0.38608 0.35153-0.08040-0.92903 0.93884
   3   5   0  -10.73    6.88   0-0.18351 0.38966 0.34471-0.00652-0.93096 0.94056
   3   6   0  122.95    8.88   0-0.18098 0.38615 0.34866 0.05853-0.92985 0.93962
   3   7   0    4.43    9.61   0-0.17315 0.37994 0.36082 0.11546-0.92630 0.93615
   3   9  -1   57.69    7.44   0-0.18305 0.38659 0.34543 0.26487-0.93076 0.90125
   3  11  -2    6.27    9.41   0-0.17428 0.37573 0.35907 0.38815-0.92683 0.85808
   3  12  -3   -9.91    8.03   0-0.17661 0.37398 0.35547 0.45911-0.92789 0.82188
   4  -5  -9   32.78    7.79   0-0.18029 0.43966 0.34974-0.68919-0.92955 0.60371
   4   1  -2   38.78    9.26   0-0.18649 0.45749 0.34003-0.27176-0.93223 0.87177
   4   3  -1  216.00   10.10   0-0.17615 0.44900 0.35618-0.15248-0.92768 0.90423
   4   4  -1 1645.93   17.24   0-0.18786 0.46073 0.33787-0.06597-0.93281 0.90897
   4   6  -1    9.21    7.56   0-0.18763 0.46141 0.33823 0.06882-0.93272 0.90757
   4   7  -1    7.72    7.16   0-0.18098 0.45435 0.34866 0.12615-0.92985 0.90416
   4   8  -1   93.36    9.32   0-0.17233 0.44411 0.36209 0.18057-0.92592 0.89901
   4   9  -2   -4.79    6.57   0-0.18672 0.45664 0.33967 0.27079-0.93233 0.86897
   4  10  -2    3.25    8.52   0-0.17084 0.44127 0.36439 0.31497-0.92522 0.86073
   4  11  -3    8.04    7.07   0-0.17684 0.44552 0.35511 0.39214-0.92800 0.82501
   5  -7 -17   -0.91   11.28   0-0.17442 0.48828 0.35886-0.83058-0.92689 0.30253
   5  -6 -13   23.53    8.10   0-0.18213 0.50393 0.34687-0.75353-0.93036 0.45517
   5  -3  -7  100.31   16.71   0-0.15152 0.48307 0.39370-0.59774-0.91555 0.66913
   5   1  -3   70.03    8.66   0-0.18236 0.52059 0.34651-0.27864-0.93046 0.83575
   5   3  -2  142.95    9.38   0-0.17638 0.51641 0.35583-0.15277-0.92779 0.87014
   5   4  -2   -0.19    7.26   0-0.18740 0.52808 0.33859-0.06779-0.93262 0.87408
   5   6  -2   47.92    7.87   0-0.18740 0.52791 0.33859 0.06791-0.93262 0.87324
   5   7  -2  149.34    8.24   0-0.18098 0.52085 0.34866 0.12617-0.92985 0.87016
   5   8  -2   -4.15    8.44   0-0.17315 0.51156 0.36082 0.17943-0.92630 0.86535
   5   9  -3  -10.41    6.83   0-0.18557 0.52251 0.34147 0.26901-0.93184 0.83413
   5  11  -4    2.84    9.01   0-0.17523 0.51102 0.35761 0.38948-0.92726 0.78991
   6   0  -5   -1.84    7.68   0-0.18557 0.59073 0.34147-0.34117-0.93184 0.76437
   6   4  -3    2.05    6.71   0-0.17914 0.58777 0.35153-0.08057-0.92903 0.83598
   6   5  -3    5.89    7.10   0-0.18282 0.59110 0.34579-0.00690-0.93066 0.83719
   6   6  -3  187.66    8.47   0-0.18098 0.58839 0.34866 0.05826-0.92985 0.83649
   6   7  -3   14.89    9.24   0-0.17546 0.58328 0.35725 0.11740-0.92737 0.83306
   6   9  -4    9.28    7.38   0-0.17983 0.58518 0.35046 0.26042-0.92934 0.79638
   6  10  -5   -6.54    7.43   0-0.18649 0.58834 0.34003 0.33898-0.93223 0.76216
   7  -5 -15   -2.34   10.82   0-0.17430 0.63004 0.35904-0.69588-0.92684 0.38549
   7   2  -5   29.64    9.01   0-0.17569 0.64879 0.35690-0.22149-0.92747 0.76350
   7   8  -5    9.60    7.59   0-0.18144 0.65431 0.34794 0.19502-0.93005 0.76323
   7  10  -6   -8.26    7.53   0-0.17615 0.64524 0.35618 0.32308-0.92768 0.72343
   8   4  -6    1.20    7.14   0-0.17776 0.71787 0.35368-0.08192-0.92841 0.72956
   8   5  -6    9.94    7.07   0-0.18121 0.72183 0.34830-0.00934-0.92995 0.72985
   8   6  -6   21.76    7.00   0-0.17983 0.72022 0.35046 0.05661-0.92934 0.72865
   8   7  -6    4.89    9.56   0-0.17448 0.71471 0.35877 0.11617-0.92692 0.72614
   8   8  -7    3.15    7.30   0-0.18740 0.72419 0.33859 0.20496-0.93262 0.69466
   8   9  -7    0.63    9.43   0-0.17592 0.71358 0.35654 0.25443-0.92758 0.68799
   9   2  -9    2.02    7.15   0-0.18443 0.78875 0.34327-0.20792-0.93135 0.62192
   9   4  -8   24.51    7.33   0-0.17868 0.78403 0.35225-0.08152-0.92883 0.65728
   9   5  -8    3.54    7.34   0-0.18190 0.78748 0.34723-0.00817-0.93026 0.65775
   9   6  -8    0.43    7.29   0-0.18006 0.78467 0.35010 0.05791-0.92944 0.65793
   9   7  -8   10.22    8.46   0-0.17500 0.78050 0.35797 0.11712-0.92715 0.65407
  10   1 -12   -2.72   11.31   0-0.17176 0.83804 0.36296-0.29312-0.92565 0.50768
  10   3 -11    0.80    7.47   0-0.18397 0.85244 0.34399-0.13885-0.93115 0.55053
  10   5 -10    2.73   10.67   0-0.17338 0.84350 0.36047-0.02137-0.92641 0.58143
 -11  -2  -8   -3.15    7.66   0-0.16609-0.60929 0.37153-0.50595-0.92292 0.57793
 -11  -1  -7   -8.89    8.96   0-0.15585-0.61622 0.38705-0.45352-0.91780 0.61084
 -11   0  -6    3.58    9.55   0-0.15235-0.62098 0.39231-0.38881-0.91597 0.64719
 -11   1  -5   -3.20    9.78   0-0.15468-0.61750 0.38881-0.31740-0.91719 0.68635
 -11   2  -4   -1.99    7.13   0-0.16562-0.60381 0.37224-0.23552-0.92270 0.72876
 -10  -4 -10    1.66    7.26   0-0.16377-0.54592 0.37507-0.64553-0.92179 0.50512
 -10  -3  -8    0.58    6.78   0-0.16353-0.54235 0.37542-0.57818-0.92167 0.58081
 -10  -1  -5    2.29    7.04   0-0.16748-0.53303 0.36940-0.43669-0.92359 0.69624
 -10   0  -4   35.28    7.99   0-0.16771-0.53207 0.36904-0.36817-0.92371 0.73390
 -10   4  -2    2.63    9.15   0-0.15598-0.54109 0.38686-0.11214-0.91786 0.80371
  -9  -5 -11    5.63    6.88   0-0.15748-0.48667 0.38459-0.72033-0.91863 0.46867
  -9  -4  -8    9.38    7.20   0-0.16864-0.46958 0.36762-0.63591-0.92415 0.58795
  -9  -3  -7    1.23    8.08   0-0.15188-0.48431 0.39301-0.59369-0.91572 0.61722
  -9  -2  -5   -1.41    7.08   0-0.16469-0.46614 0.37365-0.50913-0.92224 0.69896
  -9  -1  -4    3.11    6.95   0-0.15865-0.47209 0.38283-0.44794-0.91923 0.73420
  -9   0  -3    1.26    6.36   0-0.15958-0.46828 0.38142-0.38140-0.91970 0.77197
  -9   8  -1    0.48   12.04   0-0.14075-0.48535 0.40954 0.13600-0.90967 0.83618
  -8  -6 -12   -2.92    7.09   0-0.15935-0.41455 0.38178-0.78742-0.91958 0.43481
  -8  -5  -9   -4.86    6.99   0-0.16353-0.40472 0.37542-0.71388-0.92167 0.55077
  -8  -4  -7   -1.60    6.70   0-0.16237-0.40221 0.37719-0.64814-0.92110 0.62599
  -8  -2  -4   39.69    7.28   0-0.16191-0.39839 0.37789-0.51252-0.92087 0.73986
  -8  -1  -3   20.44    9.50   0-0.15603-0.40258 0.38678-0.45278-0.91789 0.77433
  -8   0  -2   26.88    7.57   0-0.15958-0.39678 0.38142-0.37967-0.91970 0.81455
  -8   4   0   10.42   11.12   0-0.14700-0.40664 0.40029-0.12855-0.91312 0.88194
  -7  -7 -13    0.28    6.93   0-0.16864-0.33785 0.36762-0.84115-0.92415 0.40541
  -7  -6 -11    0.68    8.12   0-0.15363-0.35025 0.39039-0.79791-0.91664 0.47308
  -7  -6 -10    6.09    6.87   0-0.16725-0.33640 0.36975-0.77433-0.92348 0.51929
  -7  -5  -8   11.52    7.03   0-0.16028-0.33947 0.38037-0.71726-0.92005 0.59160
  -7  -4  -6    0.90    6.78   0-0.16144-0.33177 0.37860-0.64974-0.92063 0.66727
  -7  -2  -3    2.24    6.55   0-0.16655-0.32345 0.37082-0.50452-0.92315 0.78382
  -7  -1  -2   17.66    6.76   0-0.16423-0.32391 0.37436-0.43985-0.92201 0.82065
  -7   2   0    7.25    9.83   0-0.15126-0.33349 0.39394-0.25685-0.91540 0.88890
  -7   6   1   -0.74   11.52   0-0.13644-0.34806 0.41586-0.00892-0.90724 0.91757
  -6  -7 -13   -6.11    9.21   0-0.15387-0.28357 0.39004-0.86431-0.91677 0.40180
  -6  -7 -12   -0.14    7.19   0-0.16493-0.27017 0.37330-0.84682-0.92236 0.44542
  -6  -6  -9    3.12    6.85   0-0.16702-0.26537 0.37011-0.77509-0.92337 0.56090
  -6  -5  -7   15.47    6.72   0-0.16237-0.26609 0.37719-0.71447-0.92110 0.63436
  -6  -4  -5   10.83    7.24   0-0.16794-0.25688 0.36869-0.63860-0.92382 0.71290
  -6   3   1   31.21   13.35   0-0.13717-0.27690 0.41480-0.21004-0.90765 0.92233
  -5  -7 -12  -15.49    8.49   0-0.15340-0.21339 0.39074-0.86612-0.91652 0.44267
  -5  -7 -11    4.59    6.72   0-0.16609-0.20087 0.37153-0.84419-0.92292 0.48838
  -5  -6  -9   87.55    9.45   0-0.15359-0.20787 0.39045-0.79668-0.91662 0.55840
  -5  -3  -3  261.25    9.42   0-0.16887-0.18264 0.36727-0.56906-0.92426 0.79309
  -5  -2  -2   22.25    8.20   0-0.15935-0.19078 0.38178-0.51578-0.91958 0.82585
  -5  -1  -1  482.52   12.78   0-0.15795-0.19010 0.38389-0.44970-0.91887 0.86310
  -5   6   2   62.41    9.60   0-0.14855-0.19435 0.39799 0.01036-0.91395 0.96907
  -5  11   0   -2.61    7.46   0-0.15981-0.19068 0.38107 0.36600-0.91982 0.89795
  -4  -8 -15   -2.92   10.10   0-0.15445-0.15066 0.38916-0.92828-0.91707 0.33445
  -4  -8 -14    2.86    7.04   0-0.16493-0.13567 0.37330-0.91421-0.92236 0.37726
  -4  -7 -11   -1.99    8.77   0-0.15562-0.13827 0.38740-0.85965-0.91768 0.48694
  -4  -6  -8  145.14    8.41   0-0.16237-0.12809 0.37719-0.78282-0.92110 0.60431
  -4  -5  -6   39.25    7.81   0-0.16005-0.12779 0.38072-0.71840-0.91993 0.67890
  -4  -4  -4  198.58    8.57   0-0.17049-0.11351 0.36478-0.63434-0.92503 0.76016
  -4  -3  -3    8.23   10.21   0-0.15333-0.12916 0.39085-0.59370-0.91648 0.78867
  -4   7   2    0.21    6.68   0-0.16377-0.11123 0.37507 0.09935-0.92179 0.98105
  -4  10   1    9.15    9.17   0-0.15713-0.11990 0.38513 0.29595-0.91845 0.93865
  -3  -8 -14    3.38    6.82   0-0.15958-0.07493 0.38142-0.92210-0.91970 0.37876
  -3  -7 -10    0.30    7.27   0-0.16725-0.05631 0.36975-0.84356-0.92348 0.53392
  -3  -6  -8   89.56   10.87   0-0.15576-0.06619 0.38719-0.79277-0.91775 0.60491
  -3  -5  -6   63.18    9.69   0-0.15275-0.06659 0.39170-0.72961-0.91619 0.67924
  -3  -4  -4   41.88    7.59   0-0.16260-0.05237 0.37684-0.64659-0.92121 0.76000
  -3   1   1 2069.25   46.79   0-0.16055-0.04570 0.37996-0.31039-0.92019 0.94710
  -3   8   2   22.22    8.83   0-0.15708-0.04816 0.38520 0.15960-0.91843 0.98131
  -3  10   1    0.66    6.86   0-0.16469-0.04460 0.37365 0.30478-0.92224 0.94627
  -2  -8 -14    4.07    9.09   0-0.15725-0.00805 0.38494-0.92576-0.91851 0.38127
  -2  -8 -13    3.06    6.89   0-0.16980 0.00942 0.36585-0.90697-0.92470 0.42523
  -2  -7 -10   32.78    7.33   0-0.16609 0.00912 0.37153-0.84560-0.92292 0.53741
  -2  -6  -8   24.06    9.81   0-0.15366 0.00020 0.39034-0.79687-0.91666 0.60697
  -2  -4  -4    3.88    7.81   0-0.16051 0.01481 0.38001-0.65069-0.92017 0.76195
  -2   8   2   -1.97    6.43   0-0.15911 0.02210 0.38213 0.16002-0.91946 0.98588
  -2  10   1   40.77    7.40   0-0.16516 0.02597 0.37294 0.30752-0.92247 0.94976
  -2  12   0    2.25    8.98   0-0.15445 0.01416 0.38916 0.42240-0.91707 0.90378
  -1  -8 -14    0.36    7.05   0-0.15888 0.06552 0.38248-0.92349-0.91935 0.38571
  -1  -7 -10   14.91    6.70   0-0.16887 0.07979 0.36727-0.84137-0.92426 0.54231
  -1  -6  -8   89.49    9.96   0-0.15585 0.07205 0.38705-0.79315-0.91780 0.61168
  -1  -5  -6  -16.24   10.13   0-0.15375 0.07584 0.39021-0.72986-0.91671 0.68608
  -1  -4  -4   74.18    8.93   0-0.16702 0.08972 0.37011-0.64025-0.92337 0.76979
  -1   4   2   95.40   10.21   0-0.16702 0.10005 0.37011-0.09767-0.92337 0.99457
  -1   7   2    5.52    6.64   0-0.16562 0.09903 0.37224 0.10376-0.92270 0.99301
  -1   8   2   81.32   10.01   0-0.15464 0.08751 0.38888 0.15426-0.91717 0.98664
  -1  10   1   -0.01    6.59   0-0.16074 0.08993 0.37966 0.29875-0.92028 0.95204
   0  -8 -15   -4.27    8.34   0-0.15340 0.12717 0.39074-0.93321-0.91652 0.34779
   0  -8 -14    6.85    6.66   0-0.16516 0.13826 0.37294-0.91439-0.92247 0.39260
   0  -7 -11    3.29    9.71   0-0.15577 0.13479 0.38717-0.86098-0.91776 0.50167
   0  -6  -8   73.94    7.43   0-0.16562 0.15066 0.37224-0.77868-0.92270 0.62043
   0  -5  -6   49.32    8.24   0-0.16469 0.15318 0.37365-0.71234-0.92224 0.69590
   0  -3  -3  354.89   14.04   0-0.15981 0.15302 0.38107-0.58334-0.91982 0.80775
   0   5   2  338.57   11.16   0-0.15795 0.15967 0.38389-0.04365-0.91887 0.99353
   0   6   2    5.80    7.42   0-0.15888 0.16172 0.38248 0.02522-0.91935 0.99359
   0   7   2   34.45    9.65   0-0.15435 0.15692 0.38931 0.08535-0.91702 0.99043
   0  10   1   13.67    8.79   0-0.15357 0.15339 0.39048 0.28749-0.91661 0.95076
   0  11   0    1.85    6.63   0-0.16446 0.16037 0.37401 0.37253-0.92213 0.91936
   1  -8 -15    1.88    6.85   0-0.16237 0.20494 0.37719-0.91754-0.92110 0.35719
   1  -7 -11   26.87    7.38   0-0.16933 0.21762 0.36656-0.84058-0.92448 0.51198
   1  -6  -9   78.86    8.98   0-0.15224 0.20485 0.39248-0.79947-0.91591 0.57942
   1  -4  -5  235.00   13.25   0-0.15213 0.21110 0.39264-0.66345-0.91586 0.73173
   1   9   1   22.80    8.77   0-0.15667 0.22597 0.38582 0.22507-0.91822 0.95725
   1  11   0   53.14   10.18   0-0.15436 0.22098 0.38929 0.35662-0.91703 0.91629
   1  12  -1   39.83    8.01   0-0.15911 0.22412 0.38213 0.43301-0.91946 0.88142
   2  -8 -17   -4.17    9.75   0-0.15468 0.26231 0.38881-0.92922-0.91719 0.28114
   2  -8 -16    4.13    7.18   0-0.16632 0.27374 0.37117-0.91266-0.92303 0.32448
   2  -7 -12   52.37    7.35   0-0.16771 0.28431 0.36904-0.84301-0.92371 0.47668
   2  -3  -4  859.01   19.67   0-0.16284 0.29240 0.37648-0.57961-0.92133 0.77851
   2   4   1  664.85   13.46   0-0.15818 0.29625 0.38354-0.11156-0.91899 0.96363
   2   5   1    1.07    7.33   0-0.16609 0.30503 0.37153-0.03333-0.92292 0.96684
   2   6   1    7.09    6.98   0-0.16609 0.30521 0.37153 0.03568-0.92292 0.96632
   2   7   1   56.58    7.47   0-0.16051 0.29835 0.38001 0.09529-0.92017 0.96369
   2  10   0    1.56    8.51   0-0.15678 0.29309 0.38565 0.29384-0.91828 0.92247
   2  11  -1   12.51    7.61   0-0.16655 0.30054 0.37082 0.37669-0.92315 0.88884
   3  -7 -14   10.29   10.21   0-0.15437 0.33537 0.38927-0.86465-0.91703 0.39783
   3   3   0  979.87   15.83   0-0.16423 0.36972 0.37436-0.17044-0.92201 0.93278
   3   8   0    5.98    6.65   0-0.16469 0.37055 0.37365 0.16949-0.92224 0.93065
   3   9   0   16.38    9.19   0-0.15346 0.35838 0.39064 0.21899-0.91656 0.92404
   3  10  -1   -5.61    7.31   0-0.16632 0.36845 0.37117 0.30748-0.92303 0.89388
   3  12  -2    7.59   10.27   0-0.15416 0.35487 0.38960 0.42553-0.91692 0.84764
   4  -7 -16    1.24    9.45   0-0.15445 0.40193 0.38916-0.86691-0.91707 0.32356
   4  -7 -15    4.34    7.38   0-0.16771 0.41534 0.36904-0.84314-0.92371 0.37025
   4  -6 -12   73.46   10.57   0-0.15649 0.41102 0.38610-0.79269-0.91812 0.47743
   4   9  -1   22.45    6.73   0-0.15865 0.43172 0.38283 0.22744-0.91923 0.89321
   4  11  -2   -0.65    9.30   0-0.15398 0.42237 0.38986 0.35634-0.91683 0.85253
   5  -6 -14    1.13    9.54   0-0.15281 0.47365 0.39161-0.79761-0.91622 0.40504
   5  -5 -11    7.19   10.43   0-0.15313 0.47804 0.39114-0.73053-0.91638 0.51808
   5   2  -2   -6.00   10.83   0-0.15316 0.49324 0.39109-0.25600-0.91640 0.85813
   5   9  -2   -1.52    6.83   0-0.15958 0.49830 0.38142 0.22915-0.91970 0.86004
   5  10  -3    6.67    6.78   0-0.17003 0.50789 0.36549 0.31391-0.92481 0.82603
   5  11  -3    1.49   10.01   0-0.15398 0.48954 0.38986 0.35659-0.91683 0.81834
   6  -6 -16    2.55    7.87   0-0.16469 0.54852 0.37365-0.78011-0.92224 0.33781
   6  -5 -13    0.23    9.40   0-0.15445 0.54635 0.38916-0.73034-0.91707 0.44498
   6   1  -4   23.34    7.69   0-0.16609 0.57252 0.37153-0.30356-0.92292 0.79317
   6   3  -3   10.17    6.82   0-0.16817 0.57618 0.36833-0.16537-0.92393 0.83112
   6   8  -3   12.52    7.18   0-0.16678 0.57409 0.37046 0.17254-0.92326 0.82867
   6   9  -3    8.90    9.79   0-0.15523 0.56292 0.38799 0.22359-0.91748 0.82302
   6  10  -4   -3.27    6.94   0-0.16539 0.56878 0.37259 0.30632-0.92258 0.79040
   7   3  -4   17.72    9.75   0-0.15338 0.62811 0.39077-0.18775-0.91651 0.78889
   7   4  -4    4.23    7.04   0-0.16539 0.64059 0.37259-0.10159-0.92258 0.79492
   7   5  -4    9.97    6.92   0-0.17003 0.64531 0.36549-0.02642-0.92481 0.79696
   7   6  -4    5.48    6.51   0-0.16980 0.64459 0.36585 0.04111-0.92470 0.79638
   7   7  -4    6.06    6.77   0-0.16516 0.63990 0.37294 0.10207-0.92247 0.79391
   7   8  -4   27.39    7.07   0-0.15772 0.63204 0.38424 0.15829-0.91875 0.79004
   7   9  -5   -7.86    7.40   0-0.17003 0.64084 0.36549 0.24564-0.92481 0.75860
   7  10  -5   13.79    9.16   0-0.15595 0.62885 0.38690 0.29326-0.91785 0.75041
   8  -1  -9    4.38   11.46   0-0.14853 0.68332 0.39802-0.46599-0.91394 0.60163
   8   0  -8   51.73    8.67   0-0.16191 0.69914 0.37789-0.37825-0.92087 0.64626
   8   1  -7    4.15    8.63   0-0.15449 0.69695 0.38910-0.32167-0.91709 0.67975
   8   3  -6   17.95    7.45   0-0.16771 0.70823 0.36904-0.16573-0.92371 0.72432
   8   5  -5    2.76    8.78   0-0.15235 0.69474 0.39231-0.05315-0.91597 0.75370
   8   6  -5    2.19    8.97   0-0.15445 0.69566 0.38916 0.01750-0.91707 0.75407
   8   8  -6    0.86    7.47   0-0.16655 0.70500 0.37082 0.17273-0.92315 0.72307
   8   9  -6    0.66    8.97   0-0.15538 0.69492 0.38775 0.22512-0.91755 0.71722
   9   0 -10    2.22   10.64   0-0.15211 0.75459 0.39266-0.39283-0.91585 0.56868
   9   1  -9   18.97    9.73   0-0.15583 0.76071 0.38708-0.32003-0.91779 0.60729
   9   3  -8    5.59    7.22   0-0.16933 0.77495 0.36656-0.16325-0.92448 0.65242
   9   5  -7   -4.59    8.53   0-0.15562 0.76368 0.38740-0.04663-0.91768 0.68407
   9   6  -7    5.45    8.69   0-0.15748 0.76467 0.38459 0.02250-0.91863 0.68367
   9   7  -7    3.25    9.16   0-0.15468 0.76119 0.38881 0.08611-0.91719 0.68171
  10   0 -13   -3.21    8.92   0-0.15807 0.82573 0.38371-0.38199-0.91893 0.46261
  10   2 -11    1.14    7.16   0-0.16794 0.83632 0.36869-0.23127-0.92382 0.54324
  10   3 -10    7.36    8.94   0-0.15588 0.82938 0.38700-0.18310-0.91781 0.57303
  10   4 -10   -1.61    6.93   0-0.16887 0.83880 0.36727-0.09434-0.92426 0.58104
  10   5  -9   -0.28    9.34   0-0.15270 0.82196 0.39179-0.05187-0.91616 0.61064
  10   6  -9    6.66    9.19   0-0.15389 0.82364 0.39000 0.01611-0.91678 0.60981
 -11  -2  -9   -3.72    7.21   0-0.14743-0.62982 0.39953-0.53390-0.91308 0.53019
 -11  -1  -8   -6.10   10.69   0-0.13543-0.64060 0.41720-0.48425-0.90639 0.56139
 -11   3  -4    0.20    9.46   0-0.13803-0.62978 0.41341-0.20913-0.90787 0.71390
 -10  -3  -9   -2.78    6.75   0-0.14532-0.56243 0.40266-0.60535-0.91193 0.53309
 -10  -2  -7   -8.27    6.83   0-0.15024-0.55420 0.39534-0.53058-0.91458 0.61171
 -10  -1  -6    2.78    8.47   0-0.13828-0.56415 0.41304-0.47736-0.90801 0.64344
 -10   0  -5    2.81    9.42   0-0.13325-0.56854 0.42039-0.41748-0.90512 0.67828
 -10   1  -4   -0.45    9.32   0-0.13484-0.56508 0.41806-0.34998-0.90605 0.71664
 -10   2  -3    3.29    6.52   0-0.14602-0.55247 0.40162-0.26276-0.91231 0.76106
 -10   5  -2   -2.89   10.82   0-0.12819-0.56789 0.42773-0.08817-0.90215 0.78725
 -10   6  -2    2.12   12.03   0-0.12174-0.57710 0.43701-0.02580-0.89825 0.78455
  -9  -5 -12   10.55    7.15   0-0.14508-0.50106 0.40301-0.73878-0.91180 0.42383
  -9  -4 -10    3.99    9.66   0-0.13472-0.50709 0.41823-0.68678-0.90598 0.49372
  -9  -4  -9    0.06    7.33   0-0.15071-0.48715 0.39464-0.66528-0.91483 0.53994
  -9  -2  -6    7.36    9.53   0-0.13567-0.49705 0.41686-0.54917-0.90652 0.64540
  -9   2  -2   17.47    9.83   0-0.13304-0.49370 0.42068-0.28337-0.90501 0.79540
  -9   4  -1    4.77    9.90   0-0.13670-0.48801 0.41535-0.14131-0.90711 0.83453
  -8  -6 -13    5.97    6.80   0-0.14860-0.43036 0.39778-0.80185-0.91371 0.39165
  -8  -5 -11   -4.76    8.51   0-0.13449-0.43923 0.41858-0.75853-0.90584 0.45819
  -8  -5 -10   -0.05    7.22   0-0.14766-0.42266 0.39918-0.73775-0.91320 0.50425
  -8  -4  -8    2.02    6.73   0-0.14179-0.42473 0.40787-0.67876-0.90998 0.57684
  -8  -3  -6   49.05    7.63   0-0.14508-0.41863 0.40301-0.60505-0.91180 0.65528
  -8   2  -1   45.59    9.11   0-0.13114-0.42426 0.42345-0.28742-0.90389 0.83568
  -8   8   0    3.22    9.39   0-0.13708-0.41765 0.41479 0.13082-0.90733 0.87540
  -7  -6 -12   -2.18    6.76   0-0.13967-0.36493 0.41099-0.81693-0.90880 0.42771
  -7  -5  -9   -4.64    7.06   0-0.14179-0.35724 0.40787-0.74668-0.90998 0.54280
  -7  -4  -7   79.72    9.37   0-0.13775-0.35791 0.41381-0.68377-0.90771 0.61747
  -7  -3  -5   30.93    7.08   0-0.14391-0.34883 0.40475-0.60658-0.91115 0.69634
  -7   7   1   50.08   12.45   0-0.13372-0.34834 0.41970 0.05750-0.90540 0.91565
  -7  10   0    0.73    9.29   0-0.13531-0.35294 0.41737 0.26199-0.90632 0.87753
  -6  -7 -14   -0.47    7.12   0-0.14297-0.29616 0.40613-0.87952-0.91064 0.35748
  -6  -6 -11   -2.36    9.25   0-0.13567-0.30110 0.41686-0.82225-0.90652 0.46790
  -6  -6 -10   -7.06    6.78   0-0.15024-0.28121 0.39534-0.80185-0.91458 0.51334
  -6  -5  -8    1.48    6.94   0-0.14085-0.28684 0.40926-0.74818-0.90946 0.58402
  -6  -4  -6   99.10    7.87   0-0.13991-0.28547 0.41064-0.68095-0.90893 0.66006
  -6  -3  -4  143.45    8.28   0-0.15118-0.27091 0.39394-0.59607-0.91508 0.74206
  -6  -2  -3   19.62    9.52   0-0.13754-0.28305 0.41411-0.54822-0.90759 0.77237
  -6   1   0   33.20    7.65   0-0.14790-0.26732 0.39883-0.32910-0.91333 0.89118
  -6   9   1   32.17    8.95   0-0.14156-0.27225 0.40822 0.20447-0.90985 0.92387
  -6  11   0    0.27   10.55   0-0.13661-0.28333 0.41548 0.33231-0.90706 0.88234
  -5  -7 -13   -2.30    7.02   0-0.14014-0.22778 0.41029-0.88390-0.90906 0.39771
  -5  -6 -10    5.16    8.98   0-0.13567-0.22969 0.41686-0.82243-0.90652 0.50959
  -5  -5  -7   15.66    7.15   0-0.14649-0.21283 0.40092-0.73870-0.91257 0.62946
  -5  -4  -5  101.78    7.79   0-0.14954-0.20566 0.39639-0.66625-0.91421 0.70688
  -5   2   1  641.49   23.75   0-0.13618-0.20851 0.41611-0.27884-0.90682 0.92593
  -5   5   2  110.03   12.10   0-0.13697-0.20573 0.41496-0.07400-0.90726 0.96375
  -5   7   2  136.66   11.21   0-0.13939-0.20314 0.41140 0.06488-0.90864 0.96463
  -5  10   1   13.78    6.91   0-0.14179-0.20309 0.40787 0.27357-0.90998 0.92719
  -4  -7 -12    0.97    7.23   0-0.14203-0.15465 0.40752-0.88111-0.91011 0.44056
  -4  -6  -9    3.33    6.57   0-0.14179-0.15220 0.40787-0.81361-0.90998 0.55473
  -4  -4  -5    4.65    9.79   0-0.13518-0.15122 0.41757-0.68838-0.90624 0.70260
  -4  -2  -2  357.24   11.42   0-0.13873-0.14207 0.41237-0.54630-0.90827 0.81857
  -4   0   0   11.13   12.84   0-0.13713-0.13906 0.41473-0.41372-0.90735 0.89248
  -4   8   2   51.21    7.27   0-0.14790-0.12607 0.39883 0.14513-0.91333 0.97277
  -4  11   1   -2.80    8.49   0-0.13343-0.14481 0.42013 0.32456-0.90523 0.92461
  -4  12   0    4.40    7.12   0-0.14203-0.13710 0.40752 0.40940-0.91011 0.89205
  -3  -8 -16   -9.73    7.51   0-0.14038-0.09521 0.40995-0.95095-0.90919 0.29158
  -3  -8 -15    0.56    6.88   0-0.14930-0.08423 0.39674-0.93789-0.91408 0.33450
  -3  -7 -12   52.01    9.79   0-0.13551-0.09401 0.41709-0.89112-0.90643 0.44117
  -3  -7 -11   -4.48    6.94   0-0.15024-0.07536 0.39534-0.86928-0.91458 0.48680
  -3  -6  -9    0.54    8.83   0-0.13461-0.08768 0.41841-0.82655-0.90591 0.55335
  -3  -3  -3   10.23    8.37   0-0.14156-0.07158 0.40822-0.61106-0.90985 0.78562
  -3   3   2    4.28   12.84   0-0.13506-0.06878 0.41775-0.21398-0.90617 0.97017
  -3   9   2   44.77    7.34   0-0.14038-0.06431 0.40995 0.20135-0.90919 0.97187
  -3  11   1   20.78    8.98   0-0.13944-0.06766 0.41133 0.33710-0.90867 0.93288
  -3  12   0    4.91    7.22   0-0.14907-0.06087 0.39708 0.41965-0.91396 0.89959
  -2  -8 -16    5.59    9.01   0-0.13656-0.03268 0.41555-0.95576-0.90703 0.29354
  -2  -8 -15    1.07    7.07   0-0.14649-0.01796 0.40092-0.94215-0.91257 0.33678
  -2  -7 -11   11.46    7.37   0-0.14743-0.01194 0.39953-0.87312-0.91308 0.48935
  -2  -5  -6  206.81    8.63   0-0.14954 0.00004 0.39639-0.73442-0.91421 0.68058
  -2  -3  -3   94.71   13.76   0-0.13630-0.00799 0.41594-0.61794-0.90688 0.78702
  -2   3   2 2751.93   34.77   0-0.14602 0.01004 0.40162-0.19660-0.91231 0.98035
  -2   9   2   33.15    7.16   0-0.14273 0.00711 0.40648 0.20523-0.91051 0.97688
  -2  11   1    3.92    6.85   0-0.14179 0.00326 0.40787 0.34058-0.90998 0.93773
  -1  -8 -16    2.25    8.61   0-0.13626 0.03920 0.41600-0.95558-0.90686 0.29788
  -1  -8 -15    2.47    6.96   0-0.14719 0.05182 0.39987-0.94093-0.91295 0.34098
  -1  -7 -11    0.65    6.87   0-0.14907 0.06163 0.39708-0.87098-0.91396 0.49372
  -1  -3  -3  314.95   12.92   0-0.14085 0.06519 0.40926-0.61131-0.90946 0.79357
  -1   3   2  376.51   18.12   0-0.13502 0.06813 0.41780-0.21300-0.90615 0.97778
  -1   9   2    2.60    6.83   0-0.13944 0.07255 0.41133 0.20063-0.90867 0.97862
  -1  11   1   -1.75    7.00   0-0.13967 0.06847 0.41099 0.33540-0.90880 0.94051
  -1  12   0   -1.28    7.03   0-0.14813 0.07440 0.39848 0.41634-0.91345 0.90710
   0  -8 -16    1.26    7.08   0-0.14132 0.11293 0.40856-0.94935-0.90972 0.30358
   0  -7 -12    1.06    9.44   0-0.13685 0.11384 0.41513-0.88917-0.90720 0.45274
   0  -6  -9   -1.69    9.51   0-0.13614 0.12159 0.41617-0.82179-0.90679 0.56606
   0  -2  -2  538.91   22.91   0-0.13545 0.13032 0.41718-0.55165-0.90640 0.83198
   0   4   2    6.00    9.31   0-0.14625 0.14953 0.40127-0.12968-0.91244 0.98732
   0   8   2   54.89    7.42   0-0.14414 0.14600 0.40440 0.13842-0.91128 0.98531
   0  11   1    3.94    8.43   0-0.13558 0.13524 0.41699 0.32704-0.90647 0.93972
   0  12   0   -5.53    6.86   0-0.14179 0.13733 0.40787 0.40684-0.90998 0.90735
   1  -8 -17    1.66    7.54   0-0.14085 0.17948 0.40926-0.95035-0.90946 0.26909
   1  -8 -16    0.29    7.33   0-0.15118 0.19187 0.39394-0.93525-0.91508 0.31271
   1  -7 -12   13.88    7.17   0-0.14837 0.19455 0.39813-0.87231-0.91358 0.46280
   1  -5  -7   12.14    7.27   0-0.14250 0.19863 0.40683-0.74628-0.91038 0.64855
   1   2   1  565.72   21.19   0-0.13683 0.20619 0.41516-0.27862-0.90719 0.94888
   1   5   2    3.05   10.60   0-0.13594 0.20818 0.41647-0.07696-0.90668 0.98507
   1   6   2    2.61    7.41   0-0.13991 0.21205 0.41064-0.00307-0.90893 0.98713
   1   7   2   -3.44    9.26   0-0.13649 0.20770 0.41565 0.05906-0.90699 0.98577
   1  10   1   90.18    7.66   0-0.14085 0.20946 0.40926 0.26966-0.90946 0.94845
   2  -7 -13    5.43    7.03   0-0.14696 0.26031 0.40022-0.87446-0.91282 0.42766
   2  -6 -10   12.65    7.58   0-0.14414 0.26321 0.40440-0.81089-0.91128 0.54028
   2   3   1  845.72   19.71   0-0.13683 0.27500 0.41516-0.21111-0.90718 0.95225
   2   8   1   14.68    7.20   0-0.15164 0.29048 0.39324 0.15008-0.91533 0.95838
   2   9   1   -6.19    6.45   0-0.13991 0.27727 0.41064 0.19946-0.90893 0.95228
   2  11   0   30.89    7.49   0-0.13897 0.27536 0.41202 0.33514-0.90840 0.91274
   2  12  -1    9.00    7.58   0-0.14579 0.27976 0.40196 0.41366-0.91218 0.87798
   3  -7 -15    1.73   10.13   0-0.13555 0.31622 0.41703-0.89049-0.90645 0.34953
   3  -6 -11   21.73    6.82   0-0.14555 0.33207 0.40231-0.80917-0.91206 0.50650
   3  -3  -5   10.50   12.08   0-0.13190 0.32877 0.42235-0.62624-0.90434 0.72667
   3   5   1  174.31   10.86   0-0.13521 0.34200 0.41753-0.07796-0.90626 0.95366
   3   6   1   67.96   10.58   0-0.13793 0.34553 0.41354-0.00630-0.90782 0.95541
   3   7   1   53.67   10.10   0-0.13614 0.34299 0.41617 0.05858-0.90679 0.95408
   3  10   0   14.26    9.26   0-0.13826 0.34386 0.41306 0.26621-0.90800 0.91611
   3  11  -1    4.37    7.16   0-0.14883 0.35222 0.39743 0.35004-0.91383 0.88365
   4  -7 -17    3.04   10.22   0-0.13614 0.38001 0.41617-0.89074-0.90679 0.27672
   4   2  -1   24.52    9.15   0-0.14883 0.42238 0.39743-0.26218-0.91383 0.89025
   4   4   0   12.99   10.90   0-0.13671 0.41279 0.41533-0.14419-0.90712 0.92072
   4   5   0    2.93    7.12   0-0.14649 0.42228 0.40092-0.06186-0.91257 0.92579
   4   6   0  307.62    9.79   0-0.14860 0.42294 0.39778 0.00954-0.91371 0.92720
   4   7   0  328.83    9.97   0-0.14555 0.41980 0.40231 0.07261-0.91206 0.92530
   4   8   0    9.86    6.61   0-0.13897 0.41414 0.41202 0.13100-0.90840 0.92073
   4  10  -1   15.94    7.09   0-0.14461 0.41743 0.40370 0.27558-0.91154 0.88535
   4  12  -2   17.69    9.73   0-0.13509 0.40518 0.41771 0.39768-0.90619 0.84139
   5  -4  -9    3.60    9.36   0-0.13464 0.46376 0.41836-0.69071-0.90593 0.58309
   5   4  -1   25.56    7.55   0-0.14179 0.48339 0.40787-0.13622-0.90998 0.88992
   5   5  -1   10.72    7.63   0-0.15024 0.49311 0.39534-0.05638-0.91458 0.89338
   5   6  -1  113.35    8.60   0-0.15164 0.49353 0.39324 0.01480-0.91533 0.89446
   5   7  -1   41.43    7.51   0-0.14837 0.49055 0.39813 0.07623-0.91358 0.89243
   5   8  -1   43.58    6.86   0-0.14179 0.48328 0.40787 0.13432-0.90998 0.88875
   5  10  -2  -16.26    6.49   0-0.14625 0.48457 0.40127 0.27720-0.91244 0.85262
   6  -6 -17    1.93    9.54   0-0.13567 0.51475 0.41686-0.81990-0.90652 0.28583
   6   2  -3  119.95    8.52   0-0.14367 0.55106 0.40509-0.26955-0.91102 0.81946
   6   4  -2  527.67   12.41   0-0.13797 0.54710 0.41349-0.14217-0.90783 0.85359
   6   5  -2    8.05    7.12   0-0.14649 0.55671 0.40092-0.06192-0.91257 0.85711
   6   6  -2   97.49    7.82   0-0.14837 0.55747 0.39813 0.00909-0.91358 0.85848
   6   7  -2   73.31    7.64   0-0.14579 0.55467 0.40196 0.07268-0.91218 0.85670
   6   8  -2    3.47    7.08   0-0.13967 0.54917 0.41099 0.13194-0.90880 0.85240
   6  10  -3   10.73    7.00   0-0.14297 0.55007 0.40613 0.27299-0.91064 0.81565
   6  11  -4   -1.17    7.35   0-0.14954 0.55278 0.39639 0.35065-0.91421 0.78205
   7  -5 -16    2.63   10.45   0-0.13536 0.58824 0.41731-0.75627-0.90634 0.32485
   7  -1  -7    7.02    9.51   0-0.13401 0.60353 0.41928-0.48757-0.90557 0.66533
   7   0  -6   -2.61    7.43   0-0.14602 0.61828 0.40162-0.40112-0.91231 0.71040
   7   1  -5   62.22    9.92   0-0.14024 0.61366 0.41015-0.34255-0.90912 0.74516
   7   5  -3  208.61   11.39   0-0.13708 0.61340 0.41479-0.07573-0.90733 0.81802
   7   6  -3    1.99    6.53   0-0.13991 0.61585 0.41064-0.00369-0.90893 0.81942
   7   7  -3    4.89    8.64   0-0.13803 0.61484 0.41341 0.06145-0.90787 0.81736
   7   9  -4    5.02    7.37   0-0.14766 0.62221 0.39918 0.21195-0.91320 0.78418
   7  10  -4    4.28   10.37   0-0.13614 0.61006 0.41617 0.26263-0.90679 0.77718
   8   2  -6   11.31    6.66   0-0.14649 0.68719 0.40092-0.26612-0.91257 0.71333
   8   4  -5   19.82    7.66   0-0.14555 0.68785 0.40231-0.13138-0.91206 0.75023
   8   7  -5   10.80    7.61   0-0.15071 0.69268 0.39464 0.08035-0.91483 0.75193
   8   8  -5   -0.73    7.18   0-0.14461 0.68501 0.40370 0.13953-0.91154 0.74941
   8   9  -5    4.90   10.29   0-0.13614 0.67732 0.41617 0.19458-0.90679 0.74308
   9  -2 -13   -1.62   14.72   0-0.11053 0.70847 0.45293-0.58962-0.89120 0.43043
   9  -1 -11   16.32   11.26   0-0.12516 0.72561 0.43210-0.50036-0.90033 0.51447
   9   2  -8    7.43    6.92   0-0.14930 0.75533 0.39674-0.26143-0.91408 0.64216
   9   3  -7    6.46    9.71   0-0.13620 0.74454 0.41609-0.21294-0.90682 0.67288
   9   4  -7    0.19    6.83   0-0.15047 0.75744 0.39499-0.12282-0.91471 0.68143
   9   6  -6    1.30    8.89   0-0.13567 0.74143 0.41686-0.01160-0.90652 0.70939
   9   8  -7   -8.67    7.36   0-0.14790 0.75362 0.39883 0.14499-0.91333 0.67909
  10  -1 -14    5.89   10.58   0-0.12363 0.78752 0.43430-0.50231-0.89941 0.40365
  10   1 -11    0.34   11.31   0-0.13472 0.80467 0.41823-0.35083-0.90598 0.52414
  10   2 -10    5.96    9.40   0-0.13632 0.80793 0.41591-0.28055-0.90689 0.56275
  10   4  -9    2.57    6.90   0-0.14414 0.81716 0.40440-0.13314-0.91128 0.60447
 -11  -1  -9  -10.48   10.34   0-0.11613-0.66182 0.44495-0.51204-0.89466 0.51125
 -11   0  -7   -1.58    6.92   0-0.12599-0.64810 0.43086-0.42985-0.90073 0.59321
 -11   1  -6    3.94    8.93   0-0.11704-0.65113 0.44367-0.37196-0.89523 0.62597
 -11   2  -5   -0.68    8.01   0-0.12480-0.64623 0.43257-0.29578-0.90001 0.66811
 -11   4  -4    4.39    9.49   0-0.11505-0.65469 0.44650-0.17145-0.89398 0.70026
 -10  -3 -11  -12.97    8.41   0-0.11578-0.59726 0.44546-0.64896-0.89444 0.43842
 -10  -3 -10   -2.16    7.12   0-0.12907-0.58037 0.42642-0.62911-0.90256 0.48533
 -10  -2  -8   -1.43    6.94   0-0.12860-0.57718 0.42711-0.56211-0.90228 0.56092
 -10  -1  -7    4.45    8.54   0-0.11506-0.59159 0.44648-0.51156-0.89398 0.59091
 -10   3  -3    3.36    8.40   0-0.11196-0.58629 0.45085-0.24425-0.89201 0.74022
  -9  -4 -11   -1.75    7.14   0-0.12053-0.52121 0.43869-0.70932-0.89740 0.44607
  -9  -3  -8   -4.35    6.57   0-0.13120-0.50492 0.42334-0.62650-0.90382 0.56645
  -9  -1  -5    9.27    6.81   0-0.12575-0.50667 0.43121-0.49628-0.90058 0.67750
  -9   0  -4   -0.12    9.46   0-0.11768-0.51078 0.44276-0.44247-0.89563 0.70933
  -9   1  -3    4.74    9.29   0-0.11748-0.51015 0.44304-0.37238-0.89550 0.74744
  -8  -5 -12    4.45    6.88   0-0.12053-0.45611 0.43869-0.77489-0.89740 0.41279
  -8  -4  -9   10.22    7.56   0-0.12338-0.44741 0.43461-0.70332-0.89915 0.52838
  -8  -3  -7    3.89    6.39   0-0.12101-0.44596 0.43801-0.63906-0.89769 0.60275
  -8  -2  -5   -3.07    6.59   0-0.12978-0.43139 0.42539-0.56114-0.90298 0.68323
  -8  -1  -4   66.05   10.37   0-0.11738-0.44288 0.44319-0.50907-0.89544 0.71413
  -8   1  -2   52.38    9.35   0-0.11228-0.44461 0.45040-0.38162-0.89222 0.78611
  -7  -6 -14   -5.21    8.37   0-0.11768-0.38951 0.44276-0.84767-0.89563 0.33895
  -7  -6 -13    8.27    6.90   0-0.12836-0.38094 0.42745-0.83170-0.90214 0.38345
  -7  -5 -10    3.82    7.47   0-0.12504-0.37836 0.43223-0.76894-0.90015 0.49529
  -7  -4  -8    2.86   10.03   0-0.11625-0.38311 0.44479-0.71415-0.89473 0.56557
  -7  -3  -6   27.64    9.66   0-0.11642-0.37968 0.44454-0.64669-0.89484 0.64140
  -7  -2  -4   -2.32    6.46   0-0.12907-0.36095 0.42642-0.56250-0.90256 0.72460
  -7  -1  -3   30.07    9.38   0-0.11725-0.37196 0.44337-0.50942-0.89536 0.75599
  -7   1  -1  161.42   12.35   0-0.11762-0.36828 0.44284-0.37347-0.89559 0.83129
  -7   8   1    7.86    9.44   0-0.11423-0.36890 0.44765 0.09749-0.89346 0.90307
  -6  -6 -12  -11.20    7.00   0-0.12172-0.31343 0.43699-0.84317-0.89813 0.42051
  -6  -5  -9   -0.69    6.63   0-0.12148-0.30800 0.43733-0.77621-0.89798 0.53423
  -6  -4  -7   -2.17    8.72   0-0.11435-0.31375 0.44749-0.71709-0.89353 0.60608
  -6  -3  -5    2.28    9.23   0-0.11673-0.30699 0.44411-0.64555-0.89503 0.68326
  -6  -1  -2  188.85    9.35   0-0.12860-0.29000 0.42711-0.49333-0.90228 0.80457
  -6   0  -1    0.64    7.41   0-0.12860-0.28693 0.42711-0.42780-0.90228 0.84160
  -6  10   1    3.33    9.76   0-0.11673-0.29729 0.44411 0.23627-0.89503 0.90727
  -5  -7 -15   -0.29    7.17   0-0.12053-0.25139 0.43869-0.91253-0.89740 0.30969
  -5  -7 -14    3.14    7.15   0-0.12978-0.24011 0.42539-0.89936-0.90298 0.35332
  -5  -6 -11    7.01    6.53   0-0.11982-0.24729 0.43971-0.84507-0.89696 0.46171
  -5  -5  -8    0.82    7.14   0-0.12386-0.23460 0.43393-0.77324-0.89943 0.57748
  -5  -4  -6    4.83    7.18   0-0.12006-0.23738 0.43937-0.70953-0.89711 0.65154
  -5  -3  -4   25.14    7.38   0-0.12860-0.22481 0.42711-0.62956-0.90228 0.73224
  -5   8   2    2.62    6.78   0-0.12552-0.21773 0.43155 0.11340-0.90044 0.95604
  -5  11   1   -3.85    9.91   0-0.11554-0.23230 0.44580 0.30078-0.89429 0.91040
  -4  -7 -14   -1.37    8.49   0-0.11756-0.18230 0.44293-0.91534-0.89555 0.35055
  -4  -7 -13   13.31    7.43   0-0.12954-0.17213 0.42574-0.89873-0.90284 0.39547
  -4  -6 -10   17.55    7.42   0-0.12291-0.17284 0.43529-0.84066-0.89886 0.50532
  -4  -5  -7   19.93    7.39   0-0.13333-0.15681 0.42025-0.75827-0.90506 0.62558
  -4  -1  -1   -0.11    8.99   0-0.13096-0.14565 0.42368-0.49236-0.90368 0.85056
  -4   9   2    4.49    6.73   0-0.12954-0.14474 0.42574 0.18701-0.90284 0.96193
  -3  -7 -13   -6.22    7.42   0-0.12172-0.10786 0.43699-0.91101-0.89813 0.39411
  -3  -5  -7  182.88    9.25   0-0.12338-0.09732 0.43461-0.77286-0.89915 0.62329
  -3  -4  -5   71.08    7.61   0-0.12338-0.09344 0.43461-0.70467-0.89915 0.69952
  -3  -2  -2  133.34   10.92   0-0.12243-0.08912 0.43597-0.56979-0.89857 0.81280
  -3  10   2   -4.92    8.77   0-0.11863-0.08909 0.44140 0.23912-0.89622 0.95997
  -3  12   1    4.78    8.03   0-0.11455-0.09311 0.44719 0.36871-0.89366 0.91739
  -2  -8 -17    2.91    7.74   0-0.12907-0.03937 0.42642-0.96741-0.90256 0.25058
  -2  -7 -13    0.71    9.32   0-0.11697-0.04344 0.44377-0.91767-0.89518 0.39496
  -2  -7 -12   -4.37    6.72   0-0.13143-0.02705 0.42299-0.89716-0.90396 0.44175
  -2  -6  -9   82.46    7.79   0-0.12954-0.02574 0.42574-0.83196-0.90284 0.55486
  -2  -5  -7    1.27    9.60   0-0.11673-0.03446 0.44411-0.78161-0.89503 0.62268
  -2  -4  -5  311.71   12.14   0-0.11692-0.03102 0.44384-0.71417-0.89515 0.69901
  -2  10   2   -6.71    6.41   0-0.12457-0.01322 0.43291 0.24554-0.89987 0.96635
  -2  12   1   -0.85   10.20   0-0.11815-0.02033 0.44208 0.37420-0.89593 0.92342
  -1  -8 -17   -1.87    7.07   0-0.12907 0.02963 0.42642-0.96795-0.90256 0.25435
  -1  -7 -13   -0.63    8.85   0-0.11649 0.02509 0.44445-0.91864-0.89488 0.39846
  -1  -7 -12    7.74    7.26   0-0.13167 0.03948 0.42265-0.89666-0.90410 0.44581
  -1  -6  -9   84.86    7.85   0-0.13049 0.04412 0.42437-0.83070-0.90340 0.55963
  -1  -5  -7  523.90   13.27   0-0.11800 0.03553 0.44230-0.78072-0.89583 0.62774
  -1  -4  -5   -0.85   10.87   0-0.11708 0.04100 0.44360-0.71467-0.89526 0.70207
  -1  10   2   -1.42    7.00   0-0.12291 0.05434 0.43529 0.24305-0.89886 0.96911
  -1  12   1   22.47   10.04   0-0.11744 0.04851 0.44310 0.37323-0.89548 0.92636
   0  -8 -17    1.33    7.46   0-0.13238 0.10195 0.42162-0.96272-0.90451 0.26022
   0  -7 -13   84.32    8.15   0-0.12029 0.09698 0.43903-0.91337-0.89725 0.40391
   0  -5  -7   -5.26    7.08   0-0.12528 0.11439 0.43189-0.77073-0.90030 0.63516
   0  -4  -5   32.30    8.51   0-0.12765 0.11740 0.42847-0.69905-0.90172 0.71343
   0   9   2   -4.26    6.59   0-0.13143 0.13255 0.42299 0.18729-0.90396 0.97828
   0  10   2   -0.86    9.18   0-0.11673 0.11723 0.44411 0.23421-0.89503 0.96907
   1  -7 -14   15.67    8.88   0-0.11543 0.15774 0.44595-0.92185-0.89422 0.36639
   1  -7 -13    7.09    6.86   0-0.13002 0.17412 0.42505-0.89933-0.90312 0.41418
   1  -6 -10    3.21    6.54   0-0.12338 0.17341 0.43461-0.84149-0.89915 0.52403
   1   4   2   26.40    9.22   0-0.12101 0.19196 0.43801-0.16689-0.89769 0.97667
   1   8   2   -0.23    6.71   0-0.13049 0.20115 0.42437 0.11758-0.90340 0.98135
   1   9   2   28.07    7.22   0-0.12006 0.19184 0.43937 0.17200-0.89711 0.97440
   1  11   1    9.19    7.09   0-0.12291 0.19213 0.43529 0.31252-0.89886 0.93792
   1  12   0    3.23    7.15   0-0.13191 0.19691 0.42231 0.39265-0.90424 0.90596
   2  -7 -15    7.75    8.85   0-0.11387 0.22308 0.44816-0.92243-0.89323 0.33190
   2  -7 -14    5.47    6.97   0-0.12907 0.24029 0.42642-0.90069-0.90256 0.37928
   2  -6 -11    2.30    9.76   0-0.11673 0.23400 0.44411-0.85140-0.89503 0.48555
   2  -5  -8   -1.77    7.06   0-0.12788 0.25291 0.42813-0.76679-0.90186 0.60634
   2  -4  -6  205.18   10.60   0-0.12575 0.25188 0.43121-0.70240-0.90058 0.68152
   2   1   0 4924.78   43.55   0-0.12599 0.26246 0.43086-0.36254-0.90073 0.90859
   2   6   2  324.91   11.99   0-0.11811 0.25795 0.44214-0.03451-0.89590 0.97810
   2   7   2    9.62    9.82   0-0.11799 0.25912 0.44232 0.03305-0.89582 0.97760
   2  10   1   22.43    6.72   0-0.12575 0.26406 0.43121 0.24879-0.90058 0.94356
   2  12   0    2.38    8.82   0-0.11673 0.25376 0.44411 0.37646-0.89503 0.90164
   3  -7 -16   -4.42    9.00   0-0.11863 0.29631 0.44140-0.91289-0.89622 0.30236
   3  -6 -12   12.78    9.44   0-0.11711 0.30136 0.44357-0.85045-0.89527 0.45148
   3  -5  -9  176.78    9.76   0-0.12243 0.31273 0.43597-0.77531-0.89857 0.56872
   3   2   0 1961.24   22.76   0-0.13025 0.33581 0.42471-0.28868-0.90326 0.91461
   3   4   1  188.06    9.49   0-0.12172 0.32872 0.43699-0.16523-0.89813 0.94686
   3   8   1   57.00    7.50   0-0.12954 0.33661 0.42574 0.11706-0.90284 0.95046
   3   9   1   52.89    7.61   0-0.12029 0.32766 0.43903 0.17151-0.89725 0.94450
   3  11   0    9.86    7.31   0-0.12243 0.32790 0.43597 0.31130-0.89857 0.90676
   3  12  -1    3.74    7.44   0-0.13002 0.33135 0.42505 0.38952-0.90312 0.87400
   4  -6 -13   -2.37    7.23   0-0.12812 0.38131 0.42779-0.83370-0.90200 0.42459
   4  -5 -10   90.45    8.68   0-0.12907 0.38651 0.42642-0.76580-0.90256 0.53833
   4  -4  -8   82.09   11.42   0-0.10989 0.37082 0.45378-0.72558-0.89068 0.60264
   4  -3  -6   56.47   12.30   0-0.11826 0.38225 0.44193-0.64561-0.89599 0.68401
   4   3   0  359.01   13.56   0-0.11652 0.39095 0.44441-0.24061-0.89490 0.90920
   4   9   0  151.69    8.30   0-0.12931 0.40395 0.42608 0.18515-0.90270 0.91526
   4  10   0   28.75    9.93   0-0.11736 0.39133 0.44321 0.23579-0.89543 0.90803
   4  11  -1   -6.85    7.13   0-0.12907 0.40001 0.42642 0.32005-0.90256 0.87739
   5  -6 -15    1.60    7.29   0-0.12646 0.44461 0.43018-0.83593-0.90101 0.35154
   5   3  -1  417.84   11.34   0-0.12291 0.46464 0.43529-0.23184-0.89886 0.87943
   5   6   0   20.31    9.70   0-0.11580 0.45932 0.44543-0.03949-0.89445 0.91088
   5   7   0   34.53    9.79   0-0.11619 0.45964 0.44487 0.02936-0.89470 0.91077
   5   9  -1   -1.44    6.52   0-0.13238 0.47331 0.42162 0.18887-0.90451 0.88350
   5  10  -1    6.28    6.93   0-0.12077 0.46280 0.43835 0.24069-0.89755 0.87544
   5  11  -2   -2.10    7.43   0-0.13096 0.46905 0.42368 0.32290-0.90368 0.84423
   6  -5 -14   18.18    9.77   0-0.10885 0.49787 0.45523-0.79438-0.89001 0.38036
   6   3  -2  197.72    8.73   0-0.12053 0.52989 0.43869-0.23526-0.89740 0.84324
   6   6  -1   72.33    9.38   0-0.11605 0.52645 0.44507-0.03839-0.89461 0.87648
   6   7  -1   18.76    9.23   0-0.11593 0.52674 0.44524 0.02920-0.89453 0.87632
   6   9  -2    4.82    7.01   0-0.13072 0.54004 0.42402 0.18687-0.90354 0.84730
   6  10  -2   -5.71    8.43   0-0.11673 0.52862 0.44411 0.23888-0.89503 0.84034
   6  11  -3   -4.24    7.06   0-0.12836 0.53378 0.42745 0.31945-0.90214 0.80859
   7  -5 -17    3.46   10.12   0-0.10839 0.55958 0.45589-0.79572-0.88971 0.26994
   7  -4 -13    0.16   11.28   0-0.10616 0.56390 0.45901-0.73022-0.88825 0.42116
   7   2  -4   12.68    7.22   0-0.12717 0.60202 0.42916-0.29461-0.90144 0.77504
   7   4  -3   57.85    7.56   0-0.12788 0.60439 0.42813-0.15750-0.90186 0.81309
   7   8  -3   -1.79    7.47   0-0.13262 0.60801 0.42128 0.12149-0.90465 0.81525
   7   9  -3   -0.13    6.90   0-0.12457 0.59957 0.43291 0.17776-0.89987 0.81023
   7  10  -3    8.28    8.99   0-0.11411 0.58994 0.44782 0.23128-0.89338 0.80269
   8  -4 -16    9.55   12.37   0-0.10956 0.63197 0.45424-0.72619-0.89047 0.31177
   8   3  -5   -2.28    7.36   0-0.13049 0.67249 0.42437-0.22072-0.90340 0.74279
   8   5  -4    9.83    7.11   0-0.12219 0.66633 0.43631-0.09766-0.89842 0.77441
   8   6  -4   13.10    6.97   0-0.12599 0.67029 0.43086-0.02412-0.90073 0.77663
   8   7  -4   18.18    7.02   0-0.12552 0.66950 0.43155 0.04316-0.90044 0.77602
   8   8  -4   -3.06    7.36   0-0.12148 0.66375 0.43733 0.10550-0.89798 0.77424
   8   9  -4   -8.64    9.06   0-0.11542 0.65566 0.44597 0.16362-0.89421 0.77009
   9   1  -8   -1.30    8.80   0-0.11470 0.71854 0.44698-0.37836-0.89376 0.62391
   9   4  -6    1.41    6.56   0-0.12077 0.72948 0.43835-0.16667-0.89755 0.70259
   9   5  -6    6.44    6.78   0-0.13002 0.73946 0.42505-0.08630-0.90312 0.70683
   9   7  -6   -4.78    6.96   0-0.13191 0.73999 0.42231 0.05318-0.90424 0.70875
   9   8  -6    3.28    7.51   0-0.12717 0.73509 0.42916 0.11433-0.90144 0.70581
  10   0 -12    6.05   10.82   0-0.11952 0.78694 0.44013-0.44078-0.89678 0.47725
  10   3  -9    3.13    7.40   0-0.13002 0.80301 0.42505-0.22211-0.90312 0.59694
  10   4  -8   -4.02    9.28   0-0.11756 0.79206 0.44293-0.17069-0.89555 0.62891
  10   5  -8    1.88    7.55   0-0.12765 0.80121 0.42847-0.08847-0.90172 0.63447
  10   6  -8   -0.47    7.65   0-0.13120 0.80431 0.42334-0.01545-0.90382 0.63628
 -11   0  -8    1.84    7.51   0-0.10310-0.67295 0.46313-0.46205-0.88630 0.54013
 -11   1  -7   -6.54    8.85   0-0.09759-0.68198 0.47077-0.39947-0.88260 0.57471
 -11   3  -5   -0.13   10.61   0-0.09759-0.67542 0.47077-0.26347-0.88260 0.65123
 -11   5  -4   -0.46    7.65   0-0.09435-0.67796 0.47523-0.13374-0.88038 0.68511
 -10  -2  -9   -4.86    7.05   0-0.10979-0.59787 0.45377-0.58872-0.89069 0.51072
 -10   0  -6   -1.77    6.83   0-0.10334-0.59942 0.46280-0.46225-0.88646 0.62023
 -10   1  -5   -2.62    9.67   0-0.09723-0.60416 0.47126-0.40294-0.88235 0.65396
 -10   2  -4   -0.24    9.98   0-0.09831-0.60207 0.46978-0.33079-0.88309 0.69326
  -9  -4 -13    4.65    9.67   0-0.09759-0.55101 0.47077-0.73937-0.88260 0.35557
  -9  -4 -12    5.56    7.28   0-0.10812-0.53803 0.45612-0.72446-0.88960 0.40061
  -9  -3 -10   11.98    9.84   0-0.09691-0.54583 0.47171-0.67277-0.88213 0.46902
  -9  -3  -9   -0.40    7.11   0-0.11265-0.52535 0.44974-0.65285-0.89253 0.51661
  -9  -2  -7    3.14    6.73   0-0.11313-0.52327 0.44907-0.58205-0.89283 0.59354
  -9  -1  -6    5.80    9.68   0-0.09711-0.53750 0.47144-0.53666-0.88227 0.62076
  -9   5  -1   -0.04   10.24   0-0.09975-0.52617 0.46779-0.12522-0.88406 0.81156
  -8  -5 -14   -6.60    8.33   0-0.09879-0.47757 0.46911-0.80601-0.88341 0.32239
  -8  -5 -13    0.62    7.24   0-0.10979-0.46642 0.45377-0.79244-0.89069 0.36682
  -8  -4 -10    8.75    7.44   0-0.10716-0.46576 0.45746-0.72632-0.88898 0.47979
  -8  -3  -8    6.07    8.51   0-0.09951-0.46933 0.46812-0.66905-0.88389 0.55050
  -8  -2  -6    4.56    6.55   0-0.10142-0.46368 0.46546-0.59876-0.88518 0.62763
  -8   0  -3   -0.97    6.70   0-0.11074-0.44726 0.45243-0.45261-0.89130 0.74675
  -8   5   0    6.81   13.45   0-0.06385-0.49060 0.51623-0.17673-0.85813 0.82573
  -8   9   0    0.15    9.76   0-0.09867-0.45837 0.46928 0.14282-0.88333 0.85087
  -7  -5 -12   -3.13    9.68   0-0.09771-0.40712 0.47060-0.80943-0.88268 0.40068
  -7  -5 -11   -0.69    7.10   0-0.11051-0.39222 0.45277-0.79155-0.89115 0.44720
  -7  -4  -9   58.80   10.23   0-0.09747-0.40329 0.47094-0.74117-0.88251 0.51473
  -7  -2  -5    0.94    8.85   0-0.09639-0.39681 0.47242-0.60904-0.88178 0.66515
  -7   0  -2   -3.63    6.80   0-0.11194-0.37476 0.45075-0.45118-0.89207 0.78929
  -7   9   1    0.05    8.56   0-0.09327-0.39081 0.47671 0.13333-0.87964 0.88801
  -6  -6 -14    3.86    8.82   0-0.09900-0.34210 0.46882-0.87206-0.88355 0.33107
  -6  -6 -13    3.29    7.02   0-0.11027-0.32701 0.45310-0.85954-0.89099 0.37502
  -6  -5 -10    8.34    6.83   0-0.10453-0.32992 0.46113-0.79858-0.88725 0.48578
  -6  -2  -4    0.54    9.27   0-0.09711-0.32374 0.47143-0.60781-0.88227 0.70767
  -5  -7 -16    5.10    6.86   0-0.11265-0.26435 0.44974-0.92241-0.89253 0.26710
  -5  -6 -12    2.65    7.09   0-0.10597-0.26012 0.45913-0.86573-0.88820 0.41409
  -5  -5  -9   30.33    7.02   0-0.10334-0.25912 0.46280-0.80057-0.88646 0.52694
  -5  -2  -3   57.90    8.38   0-0.10931-0.24244 0.45445-0.58832-0.89038 0.75855
  -5   9   2   -0.74    6.33   0-0.10812-0.23674 0.45612 0.15483-0.88960 0.94453
  -4  -7 -16   -5.72    7.19   0-0.10071-0.20405 0.46646-0.94006-0.88470 0.26262
  -4  -7 -15   12.72    7.08   0-0.10907-0.19680 0.45478-0.92798-0.89022 0.30655
  -4  -6 -11    5.14    6.81   0-0.10669-0.19120 0.45813-0.86379-0.88867 0.45688
  -4  -5  -8    1.02    7.07   0-0.10907-0.18012 0.45478-0.79408-0.89022 0.57179
  -4  -4  -6  384.95   10.20   0-0.10262-0.18521 0.46380-0.73399-0.88598 0.64423
  -4  -3  -4  113.49    7.92   0-0.10883-0.17555 0.45512-0.65691-0.89007 0.72437
  -4  10   2   -1.44    7.45   0-0.10931-0.16691 0.45445 0.22447-0.89038 0.94900
  -4  12   1   -5.57    6.93   0-0.10406-0.17532 0.46180 0.35351-0.88693 0.90704
  -3  -7 -15   -1.65    8.79   0-0.09879-0.13426 0.46911-0.94116-0.88341 0.30427
  -3  -7 -14   -4.87    7.17   0-0.11003-0.12161 0.45344-0.92743-0.89084 0.34865
  -3  -6 -11   27.33    9.98   0-0.09732-0.13122 0.47114-0.87825-0.88242 0.45421
  -3  -6 -10   10.93    6.69   0-0.11384-0.11283 0.44806-0.85402-0.89329 0.50327
  -3  -5  -8   10.59    9.69   0-0.09736-0.12539 0.47109-0.80939-0.88244 0.56825
  -3  -1  -1 1061.95   19.80   0-0.10740-0.10276 0.45712-0.52308-0.88913 0.84082
  -3   0   0    1.07   10.40   0-0.10406-0.10353 0.46180-0.46108-0.88693 0.87578
  -3   6   3  359.68   13.01   0-0.10111-0.10194 0.46589-0.05748-0.88497 0.98632
  -3   7   3   25.36    6.74   0-0.10429-0.09922 0.46147 0.01557-0.88709 0.98806
  -3   8   3   12.63    9.36   0-0.09903-0.10371 0.46878 0.07585-0.88357 0.98441
  -3  11   2   -9.96    9.49   0-0.09855-0.10936 0.46944 0.27804-0.88325 0.94616
  -2  -7 -14    9.08    7.25   0-0.10477-0.06075 0.46080-0.93462-0.88741 0.34924
  -2  -6 -10   94.24    7.76   0-0.10860-0.04818 0.45545-0.86229-0.88991 0.50341
  -2  -2  -2 1235.36   20.27   0-0.11265-0.03031 0.44974-0.58377-0.89253 0.81042
  -2   5   3  116.67   12.12   0-0.09763-0.03637 0.47071-0.13038-0.88263 0.98779
  -2   6   3    1.56    7.10   0-0.11051-0.02278 0.45277-0.04463-0.89115 0.99619
  -2   7   3   20.22    6.92   0-0.11146-0.02210 0.45142 0.02411-0.89176 0.99672
  -2   8   3   12.40    6.99   0-0.10597-0.02778 0.45913 0.08478-0.88820 0.99276
  -2   9   3    1.99    9.16   0-0.09759-0.03604 0.47077 0.14037-0.88260 0.98558
  -2  11   2   11.76    7.08   0-0.10477-0.03152 0.46080 0.28757-0.88741 0.95318
  -1  -7 -14    2.19    6.64   0-0.10310 0.00951 0.46313-0.93722-0.88630 0.35186
  -1  -6 -10   -2.24    6.91   0-0.10716 0.02146 0.45746-0.86412-0.88898 0.50628
  -1  -2  -2 2200.29   27.35   0-0.11361 0.03944 0.44840-0.58258-0.89313 0.81482
  -1   1   1 3185.06   71.74   0-0.09621 0.02776 0.47267-0.40319-0.88165 0.91625
  -1   5   3  180.74   12.77   0-0.09771 0.03243 0.47061-0.13026-0.88268 0.99170
  -1   6   3    4.48    7.36   0-0.10907 0.04491 0.45478-0.04688-0.89022 0.99902
  -1   7   3   99.01    7.52   0-0.11003 0.04501 0.45344 0.02221-0.89084 0.99963
  -1   8   3   28.21    6.92   0-0.10525 0.04005 0.46013 0.08316-0.88772 0.99614
  -1   9   3    8.17    9.66   0-0.09759 0.03292 0.47077 0.14018-0.88260 0.98941
  -1  11   2   -7.01    6.78   0-0.10453 0.03542 0.46113 0.28548-0.88725 0.95724
   0  -7 -14   26.87    7.24   0-0.10597 0.07995 0.45913-0.93335-0.88820 0.35761
   0  -6 -10   90.08    7.76   0-0.11170 0.09347 0.45109-0.85775-0.89192 0.51323
   0  -1  -1 1939.19   39.08   0-0.11027 0.10656 0.45310-0.52002-0.89099 0.85398
   0   3   2  290.48   14.21   0-0.11313 0.11501 0.44907-0.24431-0.89283 0.96858
   0   6   3  403.59   12.34   0-0.10047 0.10414 0.46679-0.05876-0.88454 0.99722
   0   7   3   11.80    6.56   0-0.10286 0.10742 0.46347 0.01238-0.88614 0.99844
   0   8   3   63.23    9.83   0-0.09903 0.10278 0.46878 0.07508-0.88357 0.99569
   0  11   2   25.81    8.19   0-0.09962 0.10191 0.46797 0.27961-0.88397 0.95775
   0  12   1    4.27    6.48   0-0.11218 0.11195 0.45042 0.36572-0.89222 0.92728
   1  -7 -15    4.34    8.75   0-0.09759 0.13701 0.47077-0.94139-0.88260 0.31974
   1  -6 -11   22.39    9.48   0-0.09846 0.14699 0.46956-0.87617-0.88319 0.47019
   1  -5  -8   52.21    7.43   0-0.10334 0.15770 0.46280-0.80191-0.88646 0.58737
   1  -3  -4  187.88   10.92   0-0.10621 0.16662 0.45880-0.66172-0.88835 0.74167
   1  10   2    2.23    6.78   0-0.10669 0.17646 0.45813 0.22029-0.88867 0.96660
   1  12   1    6.30    7.45   0-0.10429 0.17316 0.46147 0.35415-0.88709 0.92562
   2  -7 -16   -3.15    9.13   0-0.09939 0.20816 0.46828-0.94013-0.88381 0.28626
   2  -2  -3   13.90   11.55   0-0.10836 0.23926 0.45579-0.59107-0.88976 0.78474
   2   5   2  231.69    9.12   0-0.11074 0.25071 0.45243-0.11264-0.89130 0.97412
   2   8   2   59.43    7.29   0-0.11337 0.25344 0.44873 0.09486-0.89298 0.97459
   2   9   2    6.17    6.48   0-0.10477 0.24551 0.46080 0.15073-0.88741 0.96885
   2  11   1   49.07    7.62   0-0.11003 0.24834 0.45344 0.29427-0.89084 0.93372
   3  -7 -18    2.80    9.54   0-0.09855 0.27059 0.46944-0.94381-0.88325 0.21164
   3  -7 -17    0.91    7.19   0-0.10860 0.28475 0.45545-0.92928-0.88991 0.25712
   3  -6 -13   12.65    8.95   0-0.09492 0.27747 0.47445-0.88285-0.88077 0.39848
   3  -4  -7  636.11   15.74   0-0.11003 0.30343 0.45344-0.72506-0.89084 0.63736
   3   3   1  329.99   14.01   0-0.09643 0.30345 0.47237-0.26830-0.88180 0.93057
   3   7   2   32.05    9.68   0-0.09726 0.30678 0.47123 0.00345-0.88237 0.96696
   3  10   1   46.40    7.56   0-0.10860 0.31588 0.45545 0.22283-0.88991 0.93700
   3  11   1    7.29    9.03   0-0.09471 0.30177 0.47473 0.27281-0.88063 0.92728
   3  12   0   16.05    7.55   0-0.10501 0.31019 0.46047 0.35503-0.88757 0.89577
   4  -6 -14   31.25    7.98   0-0.10406 0.35431 0.46180-0.86893-0.88693 0.37007
   4   0  -2    4.51   12.86   0-0.09793 0.37049 0.47030-0.47101-0.88283 0.82173
   4   5   1  269.65    9.81   0-0.10094 0.37695 0.46613-0.12677-0.88486 0.93717
   4   6   1   10.12    7.35   0-0.10812 0.38563 0.45612-0.04912-0.88960 0.94109
   4   7   1  155.53    8.36   0-0.10907 0.38520 0.45478 0.02007-0.89022 0.94201
   4   8   1   20.93    6.88   0-0.10573 0.38170 0.45946 0.08348-0.88804 0.93942
   4   9   1   50.16    9.57   0-0.09872 0.37509 0.46921 0.14148-0.88336 0.93441
   4  11   0   -6.50    6.90   0-0.10358 0.37634 0.46247 0.28392-0.88662 0.89962
   4  12  -1   -5.37    7.35   0-0.11194 0.38234 0.45075 0.36396-0.89207 0.86699
   5  -6 -16    3.78    7.37   0-0.10621 0.42050 0.45880-0.86608-0.88835 0.30001
   5  -5 -12    4.48    7.53   0-0.10716 0.42933 0.45746-0.79712-0.88898 0.45253
   5   0  -3   17.23    8.34   0-0.10764 0.44625 0.45679-0.45749-0.88929 0.79457
   5   1  -2    4.09    7.70   0-0.10238 0.44389 0.46413-0.39709-0.88582 0.82819
   5   5   0   13.75    7.69   0-0.10860 0.45351 0.45545-0.11654-0.88991 0.90743
   5   8   0    6.83    6.51   0-0.11146 0.45562 0.45142 0.09142-0.89176 0.90836
   5   9   0    6.45    6.53   0-0.10429 0.44833 0.46147 0.14945-0.88709 0.90350
   5  11  -1    3.32    7.37   0-0.10716 0.44716 0.45746 0.28915-0.88898 0.86790
   6  -4 -11   -0.40   10.42   0-0.09903 0.49312 0.46878-0.73926-0.88357 0.48971
   6   0  -4  598.21   17.44   0-0.09709 0.50292 0.47145-0.47192-0.88226 0.75295
   6   1  -3  316.03   13.50   0-0.09777 0.50531 0.47051-0.40313-0.88272 0.79145
   6   4  -1    8.89    9.25   0-0.09602 0.50769 0.47293-0.20215-0.88153 0.86482
   6   5  -1   15.29    7.10   0-0.10860 0.52078 0.45545-0.11703-0.88991 0.87320
   6   8  -1   -2.72    7.24   0-0.11146 0.52153 0.45142 0.09099-0.89176 0.87485
   6   9  -1   49.31    7.39   0-0.10453 0.51508 0.46113 0.15011-0.88725 0.86972
   6  10  -1   -3.64    7.90   0-0.09639 0.50428 0.47242 0.20445-0.88178 0.86395
   6  11  -2    4.87    7.00   0-0.10645 0.51522 0.45846 0.28856-0.88851 0.83213
   7   3  -3  228.67    8.99   0-0.10931 0.58581 0.45445-0.25169-0.89038 0.80243
   7   5  -2   80.10    7.47   0-0.10262 0.58082 0.46380-0.12490-0.88598 0.83536
   7   6  -2    7.58    7.03   0-0.10860 0.58758 0.45545-0.04875-0.88991 0.83859
   7   7  -2   47.97    7.25   0-0.10955 0.58835 0.45411 0.02096-0.89053 0.83886
   7   8  -2   16.37    7.22   0-0.10669 0.58498 0.45813 0.08446-0.88867 0.83662
   7   9  -2    6.26    8.59   0-0.10023 0.57852 0.46712 0.14360-0.88438 0.83223
   8   0  -7    1.38    9.63   0-0.09879 0.63763 0.46911-0.47015-0.88341 0.64705
   8   1  -6   12.04    6.74   0-0.10740 0.64805 0.45712-0.38953-0.88913 0.69114
   8   2  -5   16.09    7.07   0-0.10286 0.64572 0.46347-0.32896-0.88614 0.72513
   8   4  -4   98.09    8.50   0-0.11146 0.65519 0.45142-0.18100-0.89176 0.76899
   8   6  -3   54.70   10.07   0-0.09801 0.64288 0.47019-0.06412-0.88288 0.79734
   8   7  -3   -5.02    9.21   0-0.09855 0.64424 0.46944 0.00636-0.88325 0.79849
   8   8  -3   17.67    9.99   0-0.09759 0.64272 0.47077 0.07093-0.88260 0.79603
   9   0  -9   11.05   10.93   0-0.09901 0.70304 0.46881-0.46991-0.88356 0.57465
   9   2  -7   44.04    7.44   0-0.11146 0.71905 0.45142-0.31720-0.89176 0.65863
   9   3  -6    1.16    6.87   0-0.10310 0.71182 0.46313-0.25946-0.88630 0.69205
   9   5  -5    8.78    7.30   0-0.10190 0.71334 0.46480-0.12624-0.88550 0.72780
   9   6  -5   -0.76    6.44   0-0.10788 0.71788 0.45646-0.04923-0.88945 0.73258
   9   7  -5    3.70    7.12   0-0.10907 0.71969 0.45478 0.01971-0.89022 0.73181
   9   8  -5   13.21    7.34   0-0.10621 0.71659 0.45880 0.08368-0.88835 0.72966
  10   1 -10   -2.23   10.11   0-0.09903 0.76974 0.46878-0.40187-0.88357 0.54031
  10   2  -9   -0.22    6.89   0-0.10477 0.77686 0.46080-0.32450-0.88741 0.58348
  10   3  -8    4.01    8.74   0-0.09976 0.77543 0.46777-0.26491-0.88406 0.61637
  10   5  -7   -0.86    7.63   0-0.10286 0.77845 0.46347-0.12379-0.88614 0.65754
  10   6  -7    4.84    7.71   0-0.10860 0.78491 0.45545-0.04885-0.88991 0.65962
 -11   0  -9   -1.45    7.38   0-0.08317-0.69484 0.49025-0.48909-0.87242 0.48830
 -11   2  -6   -1.38    7.30   0-0.09039-0.68253 0.48045-0.34357-0.87754 0.60711
 -10  -2 -11    3.52    9.14   0-0.07835-0.63429 0.49674-0.62878-0.86893 0.41386
 -10  -2 -10   -1.69    6.88   0-0.09351-0.61640 0.47617-0.61119-0.87971 0.46181
 -10  -1  -8   -0.08    6.86   0-0.09231-0.61384 0.47782-0.54502-0.87888 0.53683
 -10   0  -7   -1.89    9.62   0-0.07787-0.62732 0.49739-0.49711-0.86858 0.56449
 -10   4  -3    1.56    9.26   0-0.07835-0.62104 0.49674-0.22184-0.86893 0.71716
  -9  -3 -11    1.26    7.35   0-0.08221-0.56009 0.49155-0.69463-0.87173 0.41978
  -9  -2  -8   -9.13    6.49   0-0.09159-0.54496 0.47880-0.61425-0.87838 0.54036
  -9   0  -5    5.77    7.17   0-0.08390-0.54879 0.48928-0.48651-0.87294 0.64934
  -9   1  -4   -1.90    8.68   0-0.07667-0.55452 0.49900-0.43105-0.86769 0.68103
  -9   2  -3   10.57    8.59   0-0.07473-0.55404 0.50159-0.36423-0.86627 0.71777
  -9   3  -2    0.12    7.35   0-0.08871-0.53805 0.48274-0.27883-0.87636 0.76545
  -8  -4 -12    9.74    8.80   0-0.07842-0.49571 0.49666-0.76381-0.86898 0.38527
  -8  -4 -11    1.83    7.28   0-0.09279-0.47977 0.47716-0.74824-0.87921 0.43129
  -8  -3  -9    5.66    8.46   0-0.08027-0.49001 0.49417-0.69477-0.87033 0.49920
  -8  -2  -7   -1.20    9.71   0-0.07751-0.48845 0.49787-0.63424-0.86831 0.57223
  -8  -1  -5   -3.44    7.31   0-0.08365-0.47788 0.48960-0.55754-0.87277 0.65238
  -8   3  -1   19.79    9.62   0-0.07342-0.48236 0.50334-0.29924-0.86529 0.79634
  -7  -5 -14   -5.29    8.45   0-0.07835-0.43576 0.49674-0.83539-0.86893 0.30992
  -7  -5 -13    2.78    6.97   0-0.08630-0.42054 0.48601-0.82455-0.87466 0.35470
  -7  -4 -10   -0.20    8.63   0-0.07956-0.42013 0.49512-0.76535-0.86981 0.46430
  -7  -3  -7   54.07    7.31   0-0.09135-0.40543 0.47913-0.68152-0.87821 0.58699
  -7  -1  -4   75.16    9.89   0-0.07642-0.41461 0.49933-0.56609-0.86752 0.68966
  -7   3   0   -0.04    8.82   0-0.07353-0.41108 0.50319-0.29751-0.86537 0.83864
  -6  -6 -16   -3.83    6.90   0-0.08438-0.35933 0.48862-0.89498-0.87329 0.24325
  -6  -6 -15   -5.82    7.19   0-0.09159-0.35001 0.47880-0.88521-0.87838 0.28639
  -6  -5 -12   -3.32    8.56   0-0.07727-0.35959 0.49820-0.83861-0.86814 0.38925
  -6  -5 -11   -1.59    6.52   0-0.08943-0.34433 0.48176-0.82088-0.87686 0.43678
  -6  -4  -8   14.64    7.00   0-0.09231-0.33829 0.47782-0.74755-0.87888 0.55328
  -6  -3  -6   31.77    7.48   0-0.08847-0.33754 0.48307-0.68600-0.87619 0.62627
  -6  -1  -3   52.48   10.50   0-0.07787-0.34281 0.49739-0.56403-0.86858 0.73245
  -6   6   2   87.40   12.78   0-0.07255-0.33878 0.50449-0.09550-0.86465 0.91651
  -6   7   2   51.44   10.41   0-0.08486-0.32606 0.48797-0.01073-0.87363 0.92632
  -6   8   2    0.30    9.68   0-0.07956-0.33440 0.49512 0.04829-0.86981 0.92167
  -6  11   1    3.43    7.42   0-0.08558-0.32950 0.48699 0.26263-0.87415 0.88730
  -5  -6 -14   -6.62    6.61   0-0.08341-0.28684 0.48993-0.89624-0.87260 0.32251
  -5  -6 -13   -9.04    7.31   0-0.09399-0.27432 0.47551-0.88217-0.88004 0.36795
  -5  -5 -10   13.69    6.79   0-0.08558-0.27981 0.48699-0.82478-0.87415 0.47645
  -5  -4  -7  223.90    8.95   0-0.09327-0.26531 0.47650-0.74671-0.87954 0.59588
  -5  -3  -5    7.95    7.00   0-0.09303-0.26252 0.47683-0.67923-0.87938 0.67135
  -5  -1  -2   16.15    8.06   0-0.09279-0.25677 0.47716-0.54384-0.87921 0.78495
  -5   0  -1    1.67   11.51   0-0.07835-0.26791 0.49674-0.49509-0.86893 0.81177
  -5   1   0    1.91   11.10   0-0.07907-0.26470 0.49578-0.42668-0.86946 0.85008
  -5  10   2   -0.45    6.67   0-0.08750-0.25812 0.48438 0.19491-0.87551 0.93052
  -4  -7 -17   -7.39    7.30   0-0.09423-0.21293 0.47518-0.94912-0.88020 0.22012
  -4  -6 -13    3.38    9.43   0-0.07835-0.22278 0.49674-0.90068-0.86893 0.36136
  -4  -6 -12   11.86    6.92   0-0.09231-0.20779 0.47782-0.88354-0.87888 0.40909
  -4  -5  -9   11.22    7.24   0-0.08750-0.20659 0.48438-0.82238-0.87551 0.51956
  -4  -2  -3   66.50    8.51   0-0.08269-0.19953 0.49090-0.62480-0.87208 0.74429
  -4   6   3    0.70    9.73   0-0.07473-0.19698 0.50159-0.09278-0.86627 0.96416
  -4   7   3   54.13    9.15   0-0.08338-0.18821 0.48997-0.01342-0.87258 0.97047
  -4   8   3    8.97    8.72   0-0.08087-0.19076 0.49336 0.05146-0.87076 0.96843
  -4  11   2   -2.22    6.62   0-0.08726-0.18965 0.48471 0.26244-0.87534 0.93389
  -3  -7 -17   -1.26    7.37   0-0.08462-0.15344 0.48830-0.96215-0.87346 0.21728
  -3  -7 -16   -1.42    7.20   0-0.09183-0.14423 0.47848-0.95274-0.87854 0.26032
  -3  -6 -12    4.92    6.97   0-0.08149-0.14955 0.49253-0.89873-0.87121 0.40512
  -3  -4  -6    7.57    6.72   0-0.08847-0.13054 0.48307-0.75375-0.87619 0.63780
  -3  -3  -4  193.84    9.63   0-0.09255-0.12282 0.47749-0.67961-0.87904 0.71716
  -3   5   3  174.99   11.98   0-0.08253-0.12044 0.49113-0.15029-0.87196 0.97372
  -3   9   3   46.15    7.29   0-0.08823-0.11392 0.48340 0.12886-0.87602 0.97717
  -3  10   3   10.34    8.92   0-0.07674-0.12588 0.49890 0.17957-0.86775 0.96698
  -3  12   2    6.16    9.45   0-0.07722-0.12858 0.49826 0.31838-0.86811 0.93008
  -2  -7 -17   -7.75    9.49   0-0.07787-0.09369 0.49739-0.97091-0.86858 0.21649
  -2  -7 -16    5.41    7.64   0-0.08510-0.08472 0.48765-0.96113-0.87380 0.25964
  -2  -7 -15    8.03    6.97   0-0.09423-0.07357 0.47518-0.94906-0.88020 0.30402
  -2  -6 -11   95.08    7.52   0-0.08943-0.06868 0.48176-0.88802-0.87686 0.45245
  -2  -5  -8  405.79   10.08   0-0.08967-0.06361 0.48143-0.81993-0.87703 0.56678
  -2  -4  -6    6.21    9.90   0-0.07835-0.07126 0.49674-0.76750-0.86893 0.63428
  -2  -3  -4   42.51    9.20   0-0.08100-0.06558 0.49318-0.69536-0.87086 0.71292
  -2  -1  -1  321.48   16.07   0-0.08919-0.05194 0.48209-0.54815-0.87670 0.83225
  -2  10   3   23.94    8.53   0-0.08162-0.05213 0.49235 0.18787-0.87130 0.97603
  -2  12   2    7.71    7.63   0-0.08365-0.05296 0.48960 0.32681-0.87277 0.93846
  -1  -7 -16   -4.01    7.36   0-0.08221-0.01571 0.49155-0.96550-0.87173 0.26134
  -1  -7 -15    3.19    6.99   0-0.09183-0.00682 0.47848-0.95260-0.87854 0.30608
  -1  -6 -11   -0.41    6.97   0-0.08702-0.00085 0.48503-0.89173-0.87517 0.45449
  -1  -5  -8    6.90    6.89   0-0.08702 0.00240 0.48503-0.82394-0.87517 0.56842
  -1  -3  -4    9.64   12.88   0-0.07658-0.00018 0.49912-0.70279-0.86763 0.71242
  -1  -1  -1  201.66   16.85   0-0.08317 0.01078 0.49025-0.55639-0.87242 0.83188
  -1  10   3   -3.97    7.02   0-0.08341 0.01669 0.48993 0.18850-0.87260 0.98083
  -1  12   2    1.72    7.31   0-0.08462 0.01480 0.48830 0.32662-0.87346 0.94347
   0  -7 -17    7.74    8.47   0-0.07533 0.04194 0.50078-0.97542-0.86671 0.22176
   0  -7 -16    1.04    6.94   0-0.08341 0.05448 0.48993-0.96406-0.87260 0.26607
   0  -7 -15    3.47    6.62   0-0.09351 0.06400 0.47617-0.95034-0.87971 0.31100
   0  -6 -11   25.44    7.04   0-0.08967 0.06857 0.48143-0.88815-0.87703 0.46049
   0  -5  -8    9.23    6.94   0-0.09087 0.07540 0.47979-0.81899-0.87787 0.57484
   0  -4  -6  130.26   12.28   0-0.07826 0.06641 0.49687-0.76777-0.86886 0.64245
   0  -3  -4 1061.95   18.15   0-0.08245 0.07386 0.49123-0.69390-0.87191 0.72149
   0   5   3   31.75    8.42   0-0.08871 0.09192 0.48274-0.14311-0.87636 0.98942
   0   9   3   19.73    6.90   0-0.09087 0.09486 0.47979 0.13098-0.87787 0.99009
   0  10   3    9.68    8.99   0-0.07956 0.08369 0.49512 0.18485-0.86981 0.98168
   0  12   2   13.38    8.24   0-0.08149 0.08315 0.49253 0.32362-0.87121 0.94459
   1  -7 -17   -8.50    9.92   0-0.07908 0.11705 0.49577-0.96877-0.86946 0.22913
   1  -7 -16    4.98    7.15   0-0.08943 0.12703 0.48176-0.95639-0.87686 0.27381
   1  -6 -12   16.53    9.60   0-0.07828 0.12424 0.49684-0.90464-0.86888 0.41732
   1  -4  -6    6.03    8.39   0-0.09303 0.15061 0.47683-0.74839-0.87938 0.65589
   1   3   2  198.78   12.89   0-0.08726 0.15819 0.48471-0.28063-0.87534 0.95483
   1   6   3    9.71    7.35   0-0.08654 0.16069 0.48569-0.07800-0.87483 0.99143
   1   7   3   34.32    7.45   0-0.09039 0.16347 0.48045-0.00463-0.87754 0.99394
   1   8   3   13.83    6.80   0-0.08847 0.16212 0.48307 0.06042-0.87619 0.99202
   1   9   3   28.98    6.64   0-0.08173 0.15459 0.49220 0.11999-0.87138 0.98716
   1  11   2   11.43    7.01   0-0.09183 0.16281 0.47848 0.26922-0.87854 0.95567
   2  -7 -18    2.53    9.17   0-0.08221 0.18481 0.49155-0.96603-0.87173 0.19637
   2  -7 -17   -3.95    7.52   0-0.09063 0.19753 0.48012-0.95408-0.87771 0.24101
   2  -6 -12    4.99    7.26   0-0.09207 0.20681 0.47815-0.88521-0.87871 0.43128
   2  -5  -9   44.89    7.64   0-0.08847 0.20963 0.48307-0.82264-0.87619 0.54253
   2   2   1  185.93   14.32   0-0.08967 0.22793 0.48143-0.34514-0.87703 0.92273
   2   4   2  107.97    9.22   0-0.09351 0.23336 0.47617-0.20427-0.87971 0.96267
   2  10   2   53.69    7.47   0-0.09375 0.23346 0.47584 0.20347-0.87987 0.96129
   2  11   2   13.23    8.92   0-0.07932 0.21979 0.49545 0.25390-0.86964 0.95147
   2  12   1   11.67    7.14   0-0.09279 0.23070 0.47716 0.33866-0.87921 0.92203
   3  -5 -10   26.40    9.31   0-0.08237 0.27021 0.49134-0.83077-0.87184 0.50444
   3   5   2  509.26   10.70   0-0.08365 0.29257 0.48960-0.15000-0.87277 0.95942
   3   6   2  -10.80    7.82   0-0.09327 0.30289 0.47650-0.07020-0.87954 0.96568
   3   8   2    0.29    7.42   0-0.09351 0.30230 0.47617 0.06607-0.87971 0.96559
   3   9   2   13.18    7.35   0-0.08750 0.29714 0.48438 0.12678-0.87551 0.96054
   3  10   2   11.87    9.59   0-0.07829 0.28759 0.49683 0.18236-0.86888 0.95367
   3  12   1    4.31   10.18   0-0.07835 0.28548 0.49674 0.31962-0.86893 0.91634
   4  -6 -15    1.91    7.97   0-0.08438 0.33311 0.48862-0.89497-0.87329 0.32016
   4  -5 -11   14.23    7.31   0-0.08750 0.34291 0.48438-0.82393-0.87551 0.47347
   4   1  -1   62.55    9.93   0-0.09135 0.36417 0.47913-0.41104-0.87821 0.85595
   4   4   1  339.81   10.19   0-0.08462 0.36082 0.48830-0.21676-0.87346 0.92617
   4  10   1   52.58    7.75   0-0.08919 0.36496 0.48209 0.19636-0.87670 0.92762
   4  11   1   -4.66    9.10   0-0.07775 0.35184 0.49755 0.24837-0.86849 0.91914
   4  12   0   -4.46    7.34   0-0.08799 0.36016 0.48372 0.33096-0.87585 0.88896
   5  -6 -18   -0.76   10.97   0-0.07763 0.38935 0.49771-0.90421-0.86840 0.20532
   5  -6 -17   -0.70    7.92   0-0.08967 0.40319 0.48143-0.88760-0.87703 0.25190
   5  -5 -13   12.71    8.90   0-0.07302 0.39373 0.50387-0.84414-0.86500 0.39004
   5  -1  -4   19.75   11.59   0-0.08085 0.41782 0.49339-0.56170-0.87075 0.73833
   5   2  -1  627.94   13.59   0-0.08799 0.42978 0.48372-0.34819-0.87585 0.85669
   5   4   0  309.78   10.11   0-0.09423 0.43814 0.47518-0.20352-0.88020 0.89887
   5   6   1   22.74   10.06   0-0.07821 0.42292 0.49693-0.09052-0.86883 0.92355
   5   7   1   -8.74    9.11   0-0.07956 0.42598 0.49512-0.01952-0.86981 0.92629
   5   8   1    0.72    8.81   0-0.07908 0.42444 0.49577 0.04705-0.86946 0.92562
   5  10   0    3.27    7.16   0-0.09447 0.43666 0.47485 0.20367-0.88037 0.89763
   5  11   0   -5.65    7.00   0-0.08269 0.42443 0.49090 0.25561-0.87208 0.88912
   6  -5 -15   -3.11   10.18   0-0.07787 0.46446 0.49739-0.83615-0.86858 0.32315
   6   2  -2  177.47    9.28   0-0.08726 0.49634 0.48471-0.34948-0.87534 0.82205
   6   6   0    3.07    9.85   0-0.07835 0.49312 0.49674-0.08925-0.86893 0.89116
   6   7   0   30.75    7.33   0-0.08365 0.49640 0.48960-0.01559-0.87277 0.89356
   6   8   0  152.90    8.76   0-0.08245 0.49488 0.49123 0.05114-0.87191 0.89266
   6   9   0   -2.61    9.01   0-0.07799 0.48911 0.49723 0.11296-0.86867 0.88948
   6  11  -1   -0.00    7.59   0-0.08365 0.49251 0.48960 0.25702-0.87277 0.85562
   7   1  -4   18.07    9.96   0-0.08052 0.55469 0.49383-0.42751-0.87051 0.74507
   7   2  -3   -0.37    9.35   0-0.07763 0.55396 0.49771-0.36226-0.86840 0.78035
   7   4  -2    3.38    6.99   0-0.08919 0.56829 0.48209-0.21141-0.87670 0.82584
   7   6  -1    4.47    9.51   0-0.07743 0.55736 0.49799-0.09151-0.86825 0.85457
   7   7  -1   75.52    9.48   0-0.08031 0.56004 0.49411-0.01981-0.87036 0.85736
   7   8  -1   23.76   10.09   0-0.07921 0.55974 0.49559 0.04729-0.86956 0.85609
   7  10  -2    2.30    7.39   0-0.09159 0.56773 0.47880 0.19976-0.87838 0.82705
   8  -3 -13    2.27   15.13   0-0.04401 0.57126 0.54167-0.74608-0.84228 0.37863
   8   3  -4    8.14    7.54   0-0.09159 0.63601 0.47880-0.27615-0.87838 0.75546
   8   4  -3    0.71    9.43   0-0.07739 0.62165 0.49804-0.22696-0.86823 0.78344
   8   5  -3    9.39    7.11   0-0.09063 0.63648 0.48012-0.14155-0.87771 0.79225
   8   9  -3    1.82    7.50   0-0.09183 0.63538 0.47848 0.13226-0.87854 0.79323
   9   4  -5   12.48    6.79   0-0.08967 0.70089 0.48143-0.21086-0.87703 0.71956
   9   6  -4   10.08    8.40   0-0.08149 0.69445 0.49253-0.08600-0.87121 0.75136
   9   7  -4   11.05    7.05   0-0.08486 0.69727 0.48797-0.01351-0.87363 0.75336
   9   8  -4    7.67    7.16   0-0.08365 0.69597 0.48960 0.05292-0.87277 0.75233
  10  -1 -13    1.55   11.66   0-0.05900 0.72463 0.52234-0.59152-0.85429 0.39782
  10   0 -11   -1.66   10.52   0-0.07618 0.74413 0.49965-0.49867-0.86734 0.48821
  10   4  -7   -0.35    7.51   0-0.09111 0.76651 0.47946-0.20770-0.87804 0.64968
  10   5  -6   -1.20    9.79   0-0.07859 0.75557 0.49642-0.15803-0.86911 0.67666
  10   6  -6    8.19    7.51   0-0.08558 0.76329 0.48699-0.08051-0.87415 0.68184
  10   7  -6  -10.24    7.39   0-0.08799 0.76457 0.48372-0.00829-0.87585 0.68488
  11   2 -11   11.66   10.12   0-0.08148 0.82014 0.49253-0.35773-0.87121 0.49334
  11   3 -10    6.82    7.71   0-0.08606 0.82529 0.48634-0.28365-0.87449 0.53453
  11   4  -9    0.03    8.65   0-0.07992 0.82210 0.49464-0.22207-0.87007 0.56965
 -11   1  -8    0.77    6.76   0-0.07021-0.70596 0.50766-0.43840-0.86254 0.51633
 -11   2  -7    2.29    9.92   0-0.06149-0.71378 0.51913-0.37938-0.85588 0.54851
 -11   3  -6   -2.74   10.70   0-0.05883-0.71454 0.52260-0.31767-0.85380 0.58319
 -11   4  -5    1.31    9.31   0-0.06222-0.70707 0.51818-0.24557-0.85644 0.62354
 -10  -2 -12    0.98    6.69   0-0.06682-0.64707 0.51214-0.64683-0.85997 0.36595
 -10  -1 -10   -6.21    8.70   0-0.05786-0.65397 0.52387-0.59145-0.85304 0.43419
 -10  -1  -9    5.31    7.04   0-0.07311-0.63638 0.50381-0.56810-0.86471 0.48553
 -10   1  -6   -3.13    7.38   0-0.06513-0.63771 0.51437-0.44563-0.85868 0.59232
 -10   2  -5   -3.84   10.00   0-0.05871-0.64294 0.52276-0.38635-0.85371 0.62516
 -10   3  -4   -2.35    9.41   0-0.06004-0.64035 0.52103-0.31387-0.85475 0.66507
  -9  -3 -13    2.36    9.68   0-0.05907-0.58681 0.52229-0.72510-0.85399 0.32574
  -9  -3 -12   -8.00    7.12   0-0.06973-0.57434 0.50830-0.71107-0.86217 0.37213
  -9  -2 -10   -6.92    8.19   0-0.05774-0.58454 0.52402-0.66018-0.85295 0.43808
  -9  -2  -9    7.03    6.93   0-0.07287-0.56762 0.50413-0.63691-0.86453 0.48929
  -9  -1  -7   -1.74    6.88   0-0.07166-0.56310 0.50574-0.57318-0.86363 0.56341
  -9   6  -1    3.69   12.32   0-0.03765-0.58773 0.54975-0.13959-0.83664 0.76389
  -8  -4 -14   12.20    9.79   0-0.05942-0.52078 0.52184-0.78978-0.85426 0.29292
  -8  -4 -13    3.71    6.98   0-0.06948-0.50973 0.50862-0.77730-0.86199 0.33875
  -8  -3 -10    0.93    6.96   0-0.06440-0.50630 0.51532-0.71844-0.85812 0.44794
  -8   0  -4   50.05    7.59   0-0.06876-0.49135 0.50958-0.50835-0.86144 0.67954
  -8   1  -3   12.23    9.81   0-0.05849-0.50044 0.52306-0.45388-0.85353 0.70908
  -8   2  -2   86.54   10.73   0-0.05677-0.49988 0.52528-0.38915-0.85219 0.74558
  -7  -5 -15   -0.41    6.97   0-0.06876-0.44224 0.50958-0.84800-0.86144 0.26529
  -7  -4 -11   25.94    7.39   0-0.06610-0.43889 0.51309-0.78259-0.85942 0.41626
  -7  -3  -8   23.89    6.88   0-0.06924-0.42990 0.50894-0.71098-0.86181 0.53219
  -7  -2  -6   -0.39    6.70   0-0.06586-0.42792 0.51341-0.64919-0.85924 0.60474
  -7   0  -3   57.04   10.52   0-0.05971-0.42994 0.52146-0.51981-0.85449 0.71401
  -7  10   1    1.83    8.03   0-0.06085-0.42452 0.51997 0.16371-0.85538 0.86608
  -6  -5 -13    0.08    6.81   0-0.06465-0.37295 0.51500-0.85356-0.85831 0.34206
  -6  -4  -9   13.25    6.86   0-0.07263-0.35996 0.50446-0.77401-0.86435 0.50061
  -6  -3  -7   27.16    7.52   0-0.06222-0.36644 0.51818-0.72029-0.85644 0.56842
  -6  -2  -5   31.98    8.81   0-0.06150-0.36183 0.51913-0.65365-0.85588 0.64443
  -6   0  -2   28.60   10.60   0-0.06150-0.35731 0.51913-0.51701-0.85588 0.75773
  -6   2   0  278.68   14.16   0-0.05864-0.35673 0.52285-0.38561-0.85365 0.83068
  -6   9   2    1.39    6.72   0-0.06779-0.34465 0.51086 0.10286-0.86071 0.91293
  -5  -6 -17   12.02    8.70   0-0.05907-0.31782 0.52229-0.92400-0.85399 0.19252
  -5  -6 -16   -1.11    6.72   0-0.06755-0.30693 0.51118-0.91752-0.86053 0.23422
  -5  -6 -15   -8.85    6.87   0-0.07480-0.29756 0.50156-0.90790-0.86597 0.27770
  -5  -5 -12   14.12    8.17   0-0.05794-0.31276 0.52376-0.86332-0.85311 0.37821
  -5  -5 -11   23.83    6.74   0-0.06997-0.29663 0.50798-0.84565-0.86236 0.42704
  -5  -4  -8   75.25    7.76   0-0.06973-0.29100 0.50830-0.77821-0.86217 0.54035
  -5  -3  -6   13.97    9.64   0-0.06150-0.29547 0.51913-0.72163-0.85588 0.60964
  -5  -2  -4  150.65    8.91   0-0.06537-0.28796 0.51405-0.64831-0.85887 0.68879
  -5   4   2   12.57   13.56   0-0.05045-0.29180 0.53345-0.26045-0.84715 0.90350
  -5  11   2    3.21    7.55   0-0.06537-0.27830 0.51405 0.23548-0.85887 0.91443
  -4  -6 -15    3.82    9.52   0-0.06029-0.24611 0.52071-0.92633-0.85494 0.27089
  -4  -6 -14    6.52    7.02   0-0.06924-0.23504 0.50894-0.91457-0.86181 0.31580
  -4  -5 -10   33.61    7.12   0-0.06876-0.22702 0.50958-0.84755-0.86144 0.46731
  -4  -4  -7   28.22    7.85   0-0.07408-0.21571 0.50253-0.77263-0.86543 0.58536
  -4  -3  -5   35.82    7.42   0-0.07021-0.21548 0.50766-0.70960-0.86254 0.65905
  -4  -1  -2  133.15   12.61   0-0.05617-0.22472 0.52607-0.59217-0.85171 0.76132
  -4   9   3   -1.75    6.93   0-0.07190-0.20169 0.50542 0.10558-0.86381 0.96121
  -4  10   3    7.58   10.26   0-0.05888-0.21330 0.52254 0.15824-0.85384 0.95087
  -3  -6 -14   -1.66    9.06   0-0.05738-0.17745 0.52450-0.93070-0.85266 0.31017
  -3  -6 -13    5.61    7.84   0-0.06828-0.16477 0.51022-0.91608-0.86108 0.35682
  -3  -5  -9  293.75    9.63   0-0.07480-0.14944 0.50156-0.84000-0.86597 0.51386
  -3  -4  -7  177.02   10.85   0-0.05854-0.16198 0.52299-0.79367-0.85357 0.57784
  -3  -2  -3  336.22   15.20   0-0.05898-0.15470 0.52241-0.65660-0.85392 0.72979
  -3  11   3    1.31    9.41   0-0.05811-0.14747 0.52355 0.22323-0.85323 0.95374
  -2  -7 -18    0.48    7.47   0-0.07263-0.09864 0.50446-0.97890-0.86435 0.17375
  -2  -6 -13   62.95    9.69   0-0.05947-0.10301 0.52177-0.92820-0.85431 0.35265
  -2  -6 -12   54.82    7.93   0-0.07384-0.08667 0.50285-0.90943-0.86525 0.40287
  -2  -5  -9    8.20    7.51   0-0.06537-0.09052 0.51405-0.85277-0.85887 0.51018
  -2   0   0  548.46   22.35   0-0.06948-0.06998 0.50862-0.50666-0.86199 0.85527
  -2   4   3  384.76   15.62   0-0.06074-0.07326 0.52012-0.24702-0.85529 0.96135
  -2  11   3   -7.68    6.95   0-0.06586-0.07045 0.51341 0.23353-0.85924 0.96407
  -1  -7 -18    7.25    7.17   0-0.06876-0.03621 0.50958-0.98385-0.86144 0.17465
  -1  -7 -17   -2.51    7.38   0-0.07456-0.02552 0.50188-0.97582-0.86579 0.21723
  -1  -6 -12  108.37    8.14   0-0.06997-0.02134 0.50798-0.91505-0.86236 0.40296
  -1  -5  -9   58.88   10.00   0-0.06028-0.02583 0.52072-0.85922-0.85493 0.51063
  -1  -4  -6    9.63    7.70   0-0.07456-0.00619 0.50188-0.77314-0.86579 0.63469
  -1   4   3   14.70    9.31   0-0.06803 0.00406 0.51054-0.23890-0.86089 0.97038
  -1  11   3   20.42    6.88   0-0.06828 0.00435 0.51022 0.23826-0.86108 0.96944
   0  -7 -18   15.26    7.65   0-0.06828 0.03247 0.51022-0.98425-0.86108 0.17813
   0  -6 -12   19.48    6.90   0-0.07069 0.04774 0.50702-0.91373-0.86290 0.40796
   0  -5  -9   49.88    9.01   0-0.06095 0.04391 0.51985-0.85887-0.85545 0.51415
   0   1   1 1947.18   40.32   0-0.05907 0.05968 0.52229-0.45280-0.85399 0.89268
   0   4   3  268.73   13.70   0-0.06174 0.06567 0.51881-0.24615-0.85607 0.96976
   0  11   3    5.94    6.92   0-0.06586 0.06992 0.51341 0.23462-0.85924 0.97133
   1  -7 -19   -3.84    7.32   0-0.06731 0.10099 0.51150-0.98589-0.86034 0.14349
   1  -7 -18    6.23    7.52   0-0.07311 0.10648 0.50381-0.97868-0.86471 0.18535
   1  -6 -13   -7.93    9.79   0-0.05944 0.10542 0.52181-0.92813-0.85428 0.36525
   1  -5  -9    3.98    6.47   0-0.06973 0.12126 0.50830-0.84782-0.86217 0.52466
   1   5   3  411.57   10.86   0-0.07408 0.14691 0.50253-0.16224-0.86543 0.98273
   1  10   3   14.54    6.88   0-0.07190 0.14529 0.50542 0.17436-0.86381 0.97985
   1  11   3   -7.08    9.51   0-0.05920 0.13029 0.52213 0.22466-0.85409 0.97070
   1  12   2    4.94    7.23   0-0.07456 0.14554 0.50188 0.31431-0.86579 0.94371
   2  -6 -14    0.36    8.13   0-0.05726 0.17064 0.52465-0.93336-0.85257 0.32838
   2  -6 -13    9.94    7.23   0-0.07190 0.18445 0.50542-0.91252-0.86381 0.37818
   2  -5 -10   66.86    9.28   0-0.05601 0.17514 0.52627-0.86600-0.85159 0.48024
   2  -4  -7   20.95    8.10   0-0.06586 0.18991 0.51341-0.78500-0.85924 0.60174
   2  -3  -5    4.72   12.08   0-0.05809 0.18688 0.52357-0.72807-0.85322 0.67106
   2   3   2  191.17   15.21   0-0.05889 0.19899 0.52252-0.31882-0.85385 0.93707
   2   6   3   10.10    7.80   0-0.06924 0.21253 0.50894-0.10159-0.86181 0.98225
   2   7   3  125.23    8.48   0-0.07456 0.21635 0.50188-0.02618-0.86579 0.98633
   2   8   3    2.53    6.98   0-0.07408 0.21578 0.50253 0.03961-0.86543 0.98577
   2   9   3   -4.70    6.53   0-0.06924 0.21051 0.50894 0.10119-0.86181 0.98201
   2  10   3    1.37    9.09   0-0.06077 0.20331 0.52008 0.15949-0.85532 0.97515
   2  12   2  -13.51    6.96   0-0.06489 0.20289 0.51468 0.30015-0.85849 0.94077
   3  -6 -15    5.51    9.88   0-0.05886 0.23678 0.52256-0.93079-0.85383 0.29570
   3  -6 -14    5.04    7.41   0-0.07408 0.25377 0.50253-0.91004-0.86543 0.34547
   3   1   0  330.44   18.12   0-0.05834 0.26360 0.52324-0.45521-0.85342 0.86502
   3   4   2  843.06   13.51   0-0.06368 0.27271 0.51627-0.24446-0.85756 0.94473
   3   8   3   16.08    8.75   0-0.05779 0.26904 0.52396 0.01810-0.85299 0.97606
   3  11   2   15.49    7.08   0-0.06634 0.27574 0.51277 0.23466-0.85961 0.94494
   4  -6 -17    6.85    9.19   0-0.05665 0.29954 0.52544-0.93310-0.85209 0.22173
   4  -6 -16    6.68    8.07   0-0.06876 0.31343 0.50958-0.91703-0.86144 0.26920
   4  -5 -12   11.22    9.05   0-0.05447 0.30766 0.52827-0.86800-0.85036 0.41014
   4  -1  -3  407.38   22.46   0-0.06051 0.33011 0.52041-0.58849-0.85511 0.75707
   4   2   0   82.52    9.64   0-0.07528 0.35047 0.50092-0.36481-0.86632 0.88166
   4   6   2    7.93    7.39   0-0.06682 0.34638 0.51214-0.10513-0.85997 0.94995
   4   7   2  124.32    8.25   0-0.07214 0.35033 0.50510-0.02986-0.86399 0.95385
   4   8   2  247.84    8.76   0-0.07166 0.34966 0.50574 0.03724-0.86363 0.95356
   4   9   2   83.17    7.73   0-0.06731 0.34520 0.51150 0.09938-0.86034 0.95023
   4  10   2    3.84    9.78   0-0.05907 0.33793 0.52229 0.15770-0.85399 0.94425
   4  12   1    5.35    7.33   0-0.06319 0.33945 0.51691 0.29840-0.85719 0.90804
   5  -4 -10   45.11   10.10   0-0.05898 0.38538 0.52241-0.79487-0.85392 0.49288
   5   3   0  181.10    9.70   0-0.06852 0.41210 0.50990-0.30671-0.86126 0.88023
   5   5   1  173.00    9.17   0-0.06634 0.41192 0.51277-0.17388-0.85961 0.91614
   5   9   1   18.77    7.02   0-0.07528 0.42120 0.50092 0.10996-0.86632 0.92134
   5  10   1   -0.10    7.03   0-0.06755 0.41173 0.51118 0.16712-0.86053 0.91619
   5  11   1   -9.52    8.54   0-0.05823 0.40099 0.52339 0.22157-0.85333 0.90845
   6  -5 -16    0.96    9.60   0-0.05689 0.44214 0.52513-0.86511-0.85228 0.26778
   6  -1  -5   71.24   11.80   0-0.05983 0.46407 0.52130-0.58994-0.85458 0.68768
   6   3  -1   26.78    7.00   0-0.07166 0.48264 0.50574-0.30230-0.86363 0.84822
   6   5   0    9.54    7.30   0-0.07021 0.48419 0.50766-0.16897-0.86254 0.88416
   6  10   0   19.30    7.06   0-0.06997 0.48286 0.50798 0.17088-0.86236 0.88304
   6  11   0   -0.82    9.98   0-0.05956 0.47067 0.52166 0.22529-0.85437 0.87636
   7  -4 -14    0.43    8.76   0-0.05592 0.51411 0.52638-0.79846-0.85152 0.34687
   7   0  -5    0.67    7.37   0-0.06973 0.54336 0.50830-0.50857-0.86217 0.69893
   7   3  -2   28.46    6.85   0-0.06561 0.54373 0.51373-0.31109-0.85905 0.80922
   7   5  -1    1.79    6.92   0-0.06731 0.54725 0.51150-0.17292-0.86034 0.84814
   7   9  -1  -11.01    7.03   0-0.07528 0.55385 0.50092 0.10947-0.86632 0.85367
   7  10  -1   -0.85    7.23   0-0.06803 0.54632 0.51054 0.16790-0.86089 0.84820
   8  -1  -8   -1.06   10.49   0-0.05701 0.59353 0.52497-0.59259-0.85238 0.57945
   8   1  -5    5.12    8.04   0-0.05423 0.59680 0.52858-0.46196-0.85017 0.68990
   8   2  -4    5.64    9.07   0-0.05830 0.60238 0.52329-0.38871-0.85339 0.73079
   8   5  -2  120.95   10.94   0-0.05895 0.60594 0.52246-0.18412-0.85389 0.80650
   8   6  -2    1.65    6.71   0-0.06828 0.61473 0.51022-0.10363-0.86108 0.81456
   8   7  -2   18.06    7.02   0-0.07214 0.61987 0.50510-0.03061-0.86399 0.81668
   8   8  -2    7.15    7.15   0-0.07214 0.61945 0.50510 0.03734-0.86399 0.81636
   8   9  -2    4.00    7.22   0-0.06852 0.61553 0.50990 0.10052-0.86126 0.81337
   9  -1 -10    0.10   10.93   0-0.05318 0.65264 0.52993-0.59847-0.84934 0.50351
   9   1  -7   11.45    7.12   0-0.06682 0.67481 0.51214-0.44535-0.85997 0.62689
   9   2  -6   21.49    7.12   0-0.07214 0.68252 0.50510-0.37051-0.86399 0.66823
   9   3  -5    3.83    7.03   0-0.06779 0.67907 0.51086-0.30850-0.86071 0.70367
   9   4  -4    3.95    9.71   0-0.05878 0.67079 0.52267-0.25239-0.85376 0.73409
   9   5  -4   10.99    7.71   0-0.07311 0.68619 0.50381-0.16548-0.86471 0.74540
   9   7  -3    5.36    9.36   0-0.05930 0.67413 0.52199-0.04751-0.85417 0.77277
   9   8  -3   -1.12    9.68   0-0.05956 0.67332 0.52166 0.02145-0.85437 0.77430
  10   1  -9   -3.49    9.40   0-0.05920 0.73142 0.52213-0.45410-0.85409 0.55083
  10   2  -8    1.07    7.03   0-0.07021 0.74416 0.50766-0.37186-0.86254 0.59694
  10   3  -7   -0.27    7.65   0-0.06997 0.74547 0.50798-0.30438-0.86236 0.63447
  10   4  -6   -3.91    9.03   0-0.06101 0.74030 0.51976-0.24794-0.85550 0.66562
  10   6  -5   -3.58    8.99   0-0.06016 0.74031 0.52087-0.11301-0.85484 0.70251
  10   7  -5    6.63    7.17   0-0.06586 0.74534 0.51341-0.03919-0.85924 0.70516
  11   2 -10   -1.15    9.75   0-0.05592 0.79232 0.52638-0.39022-0.85152 0.51432
  11   3  -9    3.92   10.19   0-0.05871 0.80005 0.52276-0.32040-0.85371 0.55223
  11   4  -8    0.31    8.19   0-0.05774 0.79812 0.52402-0.25270-0.85295 0.59119
 -11   1  -9    8.05    7.25   0-0.05023-0.72909 0.53360-0.46180-0.84670 0.46379
 -11   2  -8    1.28    8.81   0-0.03954-0.74106 0.54723-0.40725-0.83794 0.49207
 -10  -1 -11    2.16    8.95   0-0.03954-0.66956 0.54723-0.61075-0.83794 0.38385
 -10   0  -8    0.20    7.02   0-0.05460-0.65184 0.52797-0.52714-0.85019 0.50815
 -10   1  -7   -3.31    9.36   0-0.03905-0.66633 0.54784-0.47949-0.83754 0.53336
 -10   5  -3   -2.40    9.54   0-0.03869-0.66056 0.54830-0.20767-0.83724 0.68473
  -9  -2 -11    2.16    8.94   0-0.04100-0.59935 0.54538-0.67995-0.83916 0.38748
  -9  -1  -8    4.63    7.41   0-0.04975-0.58874 0.53423-0.59911-0.84631 0.50903
  -9   0  -6   -3.36    6.78   0-0.05363-0.57956 0.52922-0.52885-0.84942 0.58723
  -9   1  -5    4.61   10.03   0-0.03857-0.59409 0.54846-0.47796-0.83713 0.61350
  -9   4  -2    0.25    9.80   0-0.03857-0.58885 0.54846-0.27634-0.83713 0.72659
  -8  -4 -15    2.87    7.28   0-0.05242-0.52804 0.53079-0.80145-0.84845 0.24818
  -8  -3 -12    4.43    9.22   0-0.03808-0.53869 0.54907-0.75051-0.83673 0.35096
  -8  -3 -11    4.31    7.40   0-0.05023-0.52493 0.53360-0.73457-0.84670 0.39930
  -8  -2  -8    6.68    6.40   0-0.05460-0.51445 0.52797-0.66110-0.85019 0.51672
  -8  -1  -6   41.40    7.31   0-0.05412-0.50982 0.52860-0.59450-0.84980 0.59288
  -7  -4 -13   -5.92    7.07   0-0.04270-0.46455 0.54322-0.81431-0.84056 0.32014
  -7  -4 -12   -0.30    7.35   0-0.05339-0.45176 0.52954-0.80066-0.84922 0.36685
  -7  -3  -9    5.58    6.74   0-0.04975-0.45201 0.53423-0.73552-0.84631 0.47864
  -7  -2  -7    8.35    9.43   0-0.04002-0.45776 0.54661-0.68004-0.83835 0.54659
  -7  -1  -5   50.37    9.77   0-0.04037-0.45299 0.54618-0.61231-0.83864 0.62229
  -7   1  -2   29.99    7.84   0-0.04902-0.43849 0.53516-0.46612-0.84572 0.74365
  -7   2  -1  101.13    8.97   0-0.04780-0.43820 0.53672-0.39976-0.84474 0.78035
  -6  -5 -16    9.69    9.94   0-0.03963-0.40578 0.54712-0.88349-0.83802 0.20806
  -6  -5 -15    1.10    6.65   0-0.04708-0.39465 0.53765-0.87637-0.84414 0.25163
  -6  -5 -14    2.07    6.75   0-0.05533-0.38449 0.52703-0.86607-0.85077 0.29625
  -6  -4 -11   13.85    9.64   0-0.04075-0.39607 0.54569-0.81540-0.83896 0.39905
  -6  -4 -10   29.28    7.53   0-0.05558-0.37878 0.52671-0.79663-0.85096 0.44917
  -6  -3  -8    1.92    9.65   0-0.03930-0.38868 0.54754-0.75138-0.83774 0.51098
  -6   1  -1   -2.09    7.50   0-0.05193-0.36385 0.53142-0.46400-0.84806 0.78703
  -6  10   2   -0.23    7.00   0-0.05023-0.36438 0.53360 0.14624-0.84670 0.89881
  -5  -5 -13    2.82    6.57   0-0.04489-0.32364 0.54044-0.87949-0.84236 0.32970
  -5  -4  -9   34.16    7.27   0-0.04926-0.31355 0.53485-0.80527-0.84592 0.48527
  -5  -1  -3    4.95   10.70   0-0.03662-0.31481 0.55091-0.61753-0.83550 0.70297
  -5   7   3   -2.21    9.70   0-0.04063-0.30147 0.54584-0.07056-0.83885 0.93337
  -5   8   3    6.80    8.83   0-0.04639-0.29480 0.53852 0.00705-0.84359 0.93836
  -5   9   3   -4.90    8.69   0-0.04051-0.30275 0.54600 0.06563-0.83875 0.93318
  -4  -6 -18  -13.13    8.99   0-0.04088-0.26718 0.54554-0.95026-0.83906 0.14149
  -4  -6 -17   -2.38    7.31   0-0.04683-0.26053 0.53796-0.94448-0.84395 0.18318
  -4  -6 -16    3.69    7.11   0-0.05291-0.25549 0.53016-0.93593-0.84884 0.22646
  -4  -5 -12   38.93    9.90   0-0.03904-0.26050 0.54786-0.88639-0.83753 0.36754
  -4  -5 -11   21.40    6.62   0-0.05266-0.24586 0.53048-0.86882-0.84864 0.41567
  -4  -4  -8   43.10    7.48   0-0.04951-0.24222 0.53454-0.80505-0.84611 0.52780
  -4   5   3  115.55   11.70   0-0.04070-0.23099 0.54576-0.20444-0.83891 0.93765
  -4  11   3    7.51    9.58   0-0.04067-0.23212 0.54580 0.20371-0.83888 0.93715
  -3  -6 -16   -2.57    9.75   0-0.03990-0.19576 0.54677-0.95295-0.83825 0.21934
  -3  -6 -15   14.53    7.52   0-0.04805-0.18914 0.53640-0.94250-0.84493 0.26428
  -3  -5 -11  148.69   10.79   0-0.03856-0.18934 0.54847-0.88789-0.83713 0.40860
  -3  -5 -10    2.20    7.12   0-0.05460-0.16946 0.52797-0.86698-0.85019 0.45921
  -3  -3  -5   42.93    8.30   0-0.04999-0.16706 0.53391-0.73623-0.84650 0.64644
  -3   8   4   -6.21    8.72   0-0.03844-0.16351 0.54861-0.00609-0.83703 0.97635
  -3  12   3   -6.43    9.22   0-0.03893-0.16733 0.54800 0.26712-0.83744 0.93842
  -2  -6 -15    3.74    9.50   0-0.03881-0.12862 0.54815-0.95498-0.83734 0.26003
  -2  -6 -14    0.18    6.68   0-0.04829-0.11478 0.53609-0.94301-0.84513 0.30608
  -2  -5 -10  140.45    8.58   0-0.04392-0.11305 0.54168-0.88043-0.84156 0.45447
  -2  -4  -7    3.56    6.86   0-0.04513-0.10673 0.54013-0.81095-0.84256 0.56955
  -2  -2  -3  399.77   17.01   0-0.03878-0.10592 0.54819-0.68254-0.83731 0.71718
  -2   6   4   33.25    9.85   0-0.03607-0.09563 0.55160-0.14333-0.83504 0.97869
  -2   7   4   63.75    7.87   0-0.04829-0.08379 0.53609-0.05957-0.84513 0.98886
  -2   8   4   13.18    7.10   0-0.05072-0.08153 0.53298 0.01124-0.84709 0.99079
  -2   9   4   63.13    7.60   0-0.04659-0.08552 0.53827 0.07356-0.84375 0.98751
  -2  10   4   -8.74    9.35   0-0.03881-0.09512 0.54815 0.13033-0.83734 0.98021
  -2  12   3    3.20    7.10   0-0.04780-0.08660 0.53672 0.27986-0.84474 0.94974
  -1  -6 -14   12.97    6.94   0-0.04270-0.05416 0.54322-0.94994-0.84056 0.30532
  -1  -6 -13   10.11    7.17   0-0.05509-0.03969 0.52734-0.93408-0.85057 0.35336
  -1  -5 -10   12.31    8.73   0-0.03866-0.05010 0.54834-0.88887-0.83721 0.45318
  -1  -4  -7   35.42   10.56   0-0.03816-0.04484 0.54897-0.82052-0.83680 0.56774
  -1   6   4   35.43    9.66   0-0.04294-0.02033 0.54291-0.13462-0.84076 0.98838
  -1   7   4   58.02    6.99   0-0.05315-0.00992 0.52985-0.05370-0.84903 0.99663
  -1   8   4   48.83    7.16   0-0.05509-0.00821 0.52734 0.01734-0.85057 0.99791
  -1   9   4    2.19    6.82   0-0.05096-0.01317 0.53267 0.07789-0.84728 0.99461
  -1  10   4   25.09    8.42   0-0.04243-0.02028 0.54356 0.13663-0.84034 0.98769
  -1  12   3   -2.68    7.05   0-0.05072-0.01700 0.53298 0.28226-0.84709 0.95645
   0  -6 -14   65.44    9.48   0-0.04124 0.01517 0.54507-0.95232-0.83936 0.30681
   0  -6 -13    5.29    7.48   0-0.05485 0.02919 0.52766-0.93478-0.85038 0.35684
   0   6   4  180.43   11.14   0-0.04140 0.04728 0.54487-0.13674-0.83949 0.99083
   0   7   4   80.42    7.21   0-0.05072 0.05644 0.53298-0.05676-0.84709 0.99849
   0   8   4  100.96    7.60   0-0.05266 0.05829 0.53048 0.01315-0.84864 0.99988
   0   9   4   -5.79    6.85   0-0.04902 0.05403 0.53516 0.07539-0.84572 0.99701
   0  10   4   -0.92    8.17   0-0.04173 0.04800 0.54446 0.13550-0.83976 0.99052
   0  12   3    2.43    6.88   0-0.04975 0.05124 0.53423 0.28068-0.84631 0.95929
   1  -6 -14    1.52    7.13   0-0.04489 0.08875 0.54044-0.94719-0.84236 0.31494
   1  -5 -10   21.01    9.37   0-0.04133 0.09084 0.54496-0.88453-0.83943 0.46380
   1  -4  -7  614.97   13.45   0-0.04440 0.09946 0.54106-0.81255-0.84196 0.58064
   1  -2  -3    6.09   15.63   0-0.03869 0.10247 0.54830-0.68546-0.83724 0.72677
   1   4   3  189.29   10.30   0-0.04805 0.12101 0.53641-0.26417-0.84493 0.96251
   1   7   4   24.90    7.16   0-0.04294 0.11855 0.54291-0.06752-0.84076 0.99572
   1   8   4   45.11    7.11   0-0.04586 0.12037 0.53920 0.00456-0.84315 0.99773
   1   9   4    7.89    6.67   0-0.04294 0.11853 0.54291 0.06875-0.84076 0.99535
   1  12   3   -3.54    7.08   0-0.04465 0.11534 0.54075 0.27407-0.84216 0.95901
   2  -6 -15    6.41    8.43   0-0.04148 0.14994 0.54477-0.95214-0.83956 0.27739
   2   5   3   14.66    7.09   0-0.05533 0.19821 0.52703-0.18735-0.85077 0.97176
   2  11   3   12.00    7.36   0-0.04975 0.19199 0.53423 0.21335-0.84631 0.96634
   2  12   3    0.78    8.70   0-0.03808 0.17713 0.54907 0.26337-0.83673 0.95582
   3  -6 -16    2.18    7.45   0-0.04513 0.22279 0.54013-0.94719-0.84256 0.24687
   3  -5 -11  187.13    9.66   0-0.04975 0.23614 0.53423-0.87406-0.84631 0.43969
   3  -4  -8   11.37    7.67   0-0.04853 0.23946 0.53578-0.80807-0.84533 0.55282
   3   0  -1 1379.06   27.14   0-0.04999 0.25359 0.53391-0.53386-0.84650 0.82053
   3   2   1  254.86   12.39   0-0.04586 0.25334 0.53920-0.40328-0.84315 0.89268
   3   6   3  175.34    8.51   0-0.04853 0.25928 0.53578-0.12833-0.84533 0.97008
   3   7   3   22.08    7.21   0-0.05558 0.26740 0.52671-0.05207-0.85096 0.97526
   3   9   3   17.93    7.34   0-0.05363 0.26534 0.52922 0.08193-0.84942 0.97329
   3  10   3   10.51    6.82   0-0.04683 0.25837 0.53796 0.14128-0.84395 0.96777
   3  11   3    9.59    8.70   0-0.03889 0.24920 0.54804 0.19681-0.83741 0.95973
   3  12   2    3.50    7.00   0-0.05242 0.25949 0.53079 0.28388-0.84845 0.93492
   4  -6 -19    4.36    9.97   0-0.03953 0.27834 0.54724-0.95457-0.83794 0.13093
   4  -6 -18    5.36    7.04   0-0.04683 0.28736 0.53796-0.94562-0.84395 0.17509
   4  -4  -9  222.46   12.69   0-0.04424 0.30305 0.54126-0.81349-0.84183 0.51493
   4   3   1   24.29    8.09   0-0.05460 0.33136 0.52797-0.32450-0.85019 0.90337
   4   5   2   48.46    8.07   0-0.05460 0.33342 0.52797-0.18876-0.85019 0.94077
   4   8   3   29.18    9.17   0-0.03816 0.31802 0.54896-0.00708-0.83680 0.96376
   4  11   2   -6.38    6.97   0-0.04999 0.32654 0.53391 0.21236-0.84650 0.93658
   5  -5 -14    4.69    8.57   0-0.04513 0.36285 0.54013-0.88039-0.84256 0.32936
   5   4   1    5.06    7.26   0-0.04683 0.39395 0.53796-0.26716-0.84395 0.90014
   5   6   2   63.72    9.88   0-0.03927 0.38645 0.54757-0.14074-0.83772 0.93134
   5   7   2    3.14    6.80   0-0.04586 0.39419 0.53920-0.06447-0.84315 0.93677
   5   8   2    0.90    6.41   0-0.04780 0.39458 0.53672 0.00533-0.84474 0.93865
   5   9   2    6.27    6.38   0-0.04537 0.39335 0.53982 0.07102-0.84276 0.93618
   5  10   2   19.69    9.49   0-0.03990 0.38750 0.54677 0.13205-0.83824 0.93141
   6  -5 -17   -2.14   10.40   0-0.03881 0.42146 0.54815-0.88788-0.83734 0.21507
   6  -4 -12   22.60   10.66   0-0.03989 0.43189 0.54679-0.81950-0.83823 0.40382
   6  -3  -9   18.74   12.11   0-0.03525 0.43176 0.55263-0.75823-0.83435 0.51450
   6   4   0   91.73    7.89   0-0.05266 0.46556 0.53048-0.25950-0.84864 0.87076
   6   6   1   37.04    7.28   0-0.04440 0.45901 0.54106-0.13482-0.84196 0.90194
   6   7   1  133.82    8.60   0-0.05072 0.46516 0.53298-0.05872-0.84709 0.90714
   6   8   1    4.51    6.85   0-0.05242 0.46759 0.53079 0.01180-0.84845 0.90761
   6   9   1   30.85    6.92   0-0.04975 0.46485 0.53423 0.07697-0.84631 0.90541
   6  10   1   36.42    7.43   0-0.04416 0.45940 0.54137 0.13645-0.84176 0.90057
   7   4  -1  131.26    8.24   0-0.04975 0.52980 0.53423-0.26386-0.84631 0.83429
   7   6   0    0.74    6.84   0-0.04392 0.52558 0.54168-0.13535-0.84156 0.86737
   7   7   0    9.35    7.01   0-0.05023 0.53277 0.53360-0.05917-0.84670 0.87175
   7   8   0   -2.34    7.04   0-0.05169 0.53265 0.53173 0.01052-0.84787 0.87356
   7   9   0   29.36    7.22   0-0.04926 0.53215 0.53485 0.07583-0.84592 0.87026
   7  10   0   -3.54    7.29   0-0.04367 0.52405 0.54199 0.13636-0.84136 0.86706
   8   3  -3  101.42    8.98   0-0.05193 0.59749 0.53142-0.32915-0.84806 0.76363
   8   4  -2   14.50    9.46   0-0.04005 0.58835 0.54658-0.27630-0.83837 0.79155
   8   6  -1  -11.24    9.45   0-0.03881 0.58641 0.54815-0.14186-0.83734 0.82836
   8   7  -1   27.78    7.51   0-0.04440 0.59339 0.54106-0.06645-0.84196 0.83309
   8   8  -1  -11.49    7.63   0-0.04635 0.59421 0.53858 0.00369-0.84355 0.83497
   8   9  -1   -7.99    7.21   0-0.04440 0.59192 0.54106 0.06918-0.84196 0.83330
   9   0  -8   -3.01   10.65   0-0.04063 0.64664 0.54584-0.54627-0.83885 0.56944
   9   5  -3   38.67    7.62   0-0.04319 0.65770 0.54261-0.20448-0.84096 0.76016
   9   6  -3   13.54    6.64   0-0.05436 0.66909 0.52828-0.12217-0.85000 0.76845
   9   8  -2   -0.65    8.70   0-0.03808 0.65060 0.54907-0.00785-0.83673 0.79318
  10   2  -7   -0.30    9.09   0-0.03698 0.71064 0.55045-0.41496-0.83581 0.60787
  10   3  -6    6.27   10.13   0-0.03784 0.71614 0.54938-0.34720-0.83652 0.64495
  10   5  -5   -3.90    7.30   0-0.05072 0.72979 0.53298-0.19405-0.84709 0.69477
  10   6  -4    9.41    9.10   0-0.03954 0.71645 0.54723-0.14290-0.83794 0.72100
  10   7  -4    5.98    8.52   0-0.04146 0.72454 0.54480-0.07006-0.83954 0.72387
  11   1 -11    2.49    9.46   0-0.03650 0.77091 0.55106-0.48447-0.83541 0.45810
  11   5  -7   -0.38    7.51   0-0.04805 0.79204 0.53640-0.19724-0.84493 0.62058
 -11   2  -9   -4.23    8.59   0-0.01856-0.76206 0.57326-0.43621-0.81973 0.43482
 -11   3  -7   -2.57    8.13   0-0.02843-0.74650 0.56110-0.35601-0.82835 0.51992
 -11   4  -6   -5.67    9.40   0-0.02332-0.74753 0.56743-0.29455-0.82391 0.55335
 -10  -1 -12    5.88    6.99   0-0.03063-0.68493 0.55837-0.62301-0.83024 0.33687
 -10   0 -10    3.88    9.97   0-0.02039-0.69243 0.57102-0.56825-0.82134 0.40404
 -10   0  -9   -2.61    6.97   0-0.03525-0.67276 0.55259-0.55184-0.83417 0.45378
 -10   1  -8   -2.07    8.82   0-0.01808-0.69119 0.57386-0.50564-0.81930 0.47651
 -10   2  -6   -6.52    7.27   0-0.02551-0.67766 0.56472-0.42812-0.82582 0.55936
 -10   3  -5    6.45    9.71   0-0.01866-0.68393 0.57314-0.36604-0.81982 0.59241
 -10   4  -4    1.62    8.94   0-0.01931-0.68116 0.57236-0.29720-0.82038 0.63082
  -9  -2 -13    5.74    9.93   0-0.02003-0.62771 0.57147-0.70415-0.82102 0.29342
  -9  -2 -12   -9.22    7.03   0-0.03038-0.61364 0.55868-0.69405-0.83003 0.33948
  -9  -1  -9   -8.66    6.82   0-0.03111-0.60748 0.55777-0.62543-0.83065 0.45418
  -9   0  -7   -5.54    6.44   0-0.02819-0.60697 0.56140-0.56121-0.82814 0.52769
  -9   2  -4    8.05    6.98   0-0.02795-0.60285 0.56171-0.42295-0.82793 0.64230
  -9   3  -3   -1.18    8.54   0-0.02271-0.60413 0.56818-0.36419-0.82338 0.67464
  -8  -3 -14    6.30    9.34   0-0.02015-0.56157 0.57132-0.77323-0.82113 0.25916
  -8  -3 -13   -6.46    6.98   0-0.02795-0.54850 0.56171-0.76521-0.82793 0.30321
  -8  -2 -10    2.45    8.97   0-0.01966-0.55298 0.57192-0.70522-0.82070 0.41086
  -8  -2  -9   -3.25    6.69   0-0.03598-0.53280 0.55167-0.68744-0.83478 0.46220
  -8  -1  -7   -0.96    6.94   0-0.02892-0.53640 0.56050-0.62846-0.82877 0.53218
  -8   0  -5   -2.76    7.67   0-0.03306-0.52858 0.55533-0.55534-0.83231 0.61168
  -7  -4 -16   -3.26    9.53   0-0.02027-0.49227 0.57117-0.84233-0.82124 0.18629
  -7  -4 -15   -4.08    7.17   0-0.02624-0.48441 0.56382-0.83500-0.82646 0.22959
  -7  -4 -14   -0.50    6.75   0-0.03379-0.47496 0.55442-0.82581-0.83293 0.27409
  -7  -3 -11   16.12    9.45   0-0.01971-0.48616 0.57186-0.77384-0.82074 0.37666
  -7  -3 -10    5.56    6.60   0-0.03330-0.47014 0.55503-0.75655-0.83252 0.42656
  -7  -2  -8    4.34    9.66   0-0.01869-0.48124 0.57311-0.70715-0.81984 0.48979
  -7   0  -4    5.60    8.39   0-0.01871-0.47527 0.57308-0.57141-0.81986 0.64173
  -6  -5 -17   -1.14    6.98   0-0.03550-0.40974 0.55228-0.89134-0.83437 0.16534
  -6  -4 -13  -24.04    8.74   0-0.01881-0.42012 0.57297-0.84606-0.81994 0.30196
  -6  -4 -12   13.73    6.98   0-0.02819-0.41021 0.56140-0.83135-0.82814 0.34988
  -6  -3  -9    5.73    9.67   0-0.02015-0.41242 0.57132-0.77345-0.82113 0.45689
  -6  -2  -6  103.31    7.90   0-0.03038-0.39531 0.55868-0.69312-0.83003 0.57978
  -6  -1  -4  158.03    8.28   0-0.03379-0.38861 0.55442-0.62057-0.83293 0.65866
  -6  11   2   -2.25    7.33   0-0.02892-0.38679 0.56050 0.18781-0.82877 0.88090
  -5  -5 -16    1.12    8.96   0-0.02051-0.35318 0.57088-0.90972-0.82145 0.19440
  -5  -5 -15    6.95    6.72   0-0.02746-0.34769 0.56231-0.90039-0.82751 0.23892
  -5  -5 -14    9.28    6.86   0-0.03550-0.33762 0.55228-0.89045-0.83437 0.28382
  -5  -4 -10    8.34    6.95   0-0.03184-0.33324 0.55685-0.82706-0.83128 0.43282
  -5  -3  -7    5.35    7.58   0-0.03428-0.32498 0.55381-0.75623-0.83334 0.54890
  -5  -2  -5    0.24    7.23   0-0.02746-0.32556 0.56231-0.69851-0.82751 0.61836
  -5   6   3  218.74   12.91   0-0.01729-0.32339 0.57482-0.16561-0.81860 0.91297
  -5  10   3    8.21    6.88   0-0.02989-0.31192 0.55928 0.12236-0.82961 0.92413
  -5  11   3    3.00    8.86   0-0.01832-0.32215 0.57357 0.17336-0.81951 0.91210
  -4  -5 -14    8.11    8.96   0-0.01930-0.28603 0.57236-0.91323-0.82038 0.27200
  -4  -5 -13   -6.02    6.70   0-0.02722-0.27174 0.56261-0.90222-0.82730 0.31808
  -4  -4  -9    5.05    7.09   0-0.02843-0.26562 0.56110-0.83186-0.82835 0.47160
  -4  -3  -6    5.90    6.92   0-0.03647-0.25155 0.55106-0.75373-0.83519 0.59249
  -4  -2  -4   55.34    8.12   0-0.03476-0.24923 0.55320-0.68735-0.83375 0.66775
  -4   0  -1   -0.37    8.92   0-0.02916-0.24786 0.56019-0.56099-0.82898 0.77543
  -3  -6 -18  -15.33    7.59   0-0.02989-0.20978 0.55928-0.96619-0.82961 0.13426
  -3  -6 -17    2.89    6.99   0-0.03476-0.20296 0.55320-0.96050-0.83375 0.17635
  -3  -5 -12   16.62    7.17   0-0.02356-0.20620 0.56713-0.90608-0.82413 0.35701
  -3  -4  -8   33.30    7.94   0-0.03184-0.19037 0.55685-0.82732-0.83128 0.51737
  -3  -1  -2   22.33   14.15   0-0.01983-0.19138 0.57171-0.63833-0.82085 0.73441
  -3   4   3 1195.59   22.58   0-0.02892-0.17388 0.56050-0.28711-0.82877 0.93146
  -3   7   4   34.39    7.61   0-0.03233-0.16857 0.55625-0.08022-0.83169 0.97202
  -3   9   4   11.56    7.62   0-0.03476-0.16654 0.55320 0.05981-0.83375 0.97385
  -3  10   4   -2.08    6.88   0-0.02648-0.17696 0.56352 0.11575-0.82667 0.96644
  -2  -6 -18    0.24    9.74   0-0.02015-0.15041 0.57132-0.97854-0.82113 0.12959
  -2  -6 -17   -0.51    7.33   0-0.02502-0.14368 0.56532-0.97281-0.82540 0.17183
  -2  -6 -16    1.99    7.28   0-0.03087-0.13569 0.55807-0.96516-0.83044 0.21502
  -2  -5 -11   11.72    6.52   0-0.02648-0.13311 0.56352-0.90273-0.82667 0.40133
  -2  -3  -5  434.04   11.62   0-0.03355-0.11484 0.55472-0.75722-0.83272 0.63630
  -2  11   4   -6.14    7.10   0-0.02600-0.10882 0.56412 0.18305-0.82625 0.96968
  -1  -6 -17    0.56    9.00   0-0.01820-0.08400 0.57371-0.98098-0.81940 0.16958
  -1  -6 -16    2.67    6.72   0-0.02454-0.07306 0.56593-0.97327-0.82498 0.21337
  -1  -6 -15   -4.99    6.39   0-0.03282-0.06274 0.55564-0.96303-0.83210 0.25851
  -1  -5 -11   -8.51    9.38   0-0.01942-0.06835 0.57222-0.91293-0.82048 0.39861
  -1  -3  -5  518.17   15.17   0-0.02207-0.05740 0.56896-0.77169-0.82282 0.63009
  -1  -2  -3 3145.56   30.02   0-0.02380-0.05227 0.56683-0.70136-0.82434 0.70772
  -1   0   0    1.59   14.92   0-0.03525-0.03411 0.55259-0.55234-0.83417 0.83048
  -1   2   2 2633.07   37.13   0-0.03452-0.03218 0.55350-0.41599-0.83355 0.90622
  -1   5   4    2.79   11.53   0-0.02015-0.04189 0.57132-0.23137-0.82113 0.96857
  -1  11   4    2.92    6.63   0-0.03111-0.03240 0.55777 0.19068-0.83065 0.97776
  -1  12   4    5.17    8.73   0-0.01780-0.04610 0.57420 0.24114-0.81905 0.96528
   0  -6 -16    6.25    8.73   0-0.02049-0.01055 0.57091-0.97685-0.82143 0.21378
   0  -6 -15   -2.03    6.58   0-0.03063 0.00405 0.55837-0.96574-0.83024 0.26053
   0  -5 -10   52.64    6.77   0-0.03623 0.01699 0.55137-0.89095-0.83499 0.45524
   0  -4  -7   -3.23    7.87   0-0.03647 0.02542 0.55106-0.82294-0.83519 0.56924
   0  -3  -5    5.62   13.21   0-0.01921 0.00976 0.57247-0.77680-0.82030 0.63028
   0  -2  -3  362.30   19.82   0-0.01977 0.01274 0.57179-0.70654-0.82079 0.70814
   0   2   2  549.33   18.85   0-0.03355 0.03588 0.55472-0.41760-0.83272 0.90912
   0   5   4  326.12   14.01   0-0.02031 0.02610 0.57113-0.23073-0.82127 0.97297
   0  11   4   13.12    7.04   0-0.03087 0.03646 0.55807 0.19019-0.83044 0.98135
   0  12   4    5.83    8.40   0-0.01736 0.02235 0.57473 0.24169-0.81866 0.96958
   1  -6 -16   -2.00    8.38   0-0.02356 0.06140 0.56713-0.97478-0.82413 0.21979
   1  -6 -15   14.42    7.75   0-0.03330 0.07319 0.55503-0.96270-0.83252 0.26623
   1  -5 -11   47.94    8.79   0-0.01869 0.06675 0.57311-0.91364-0.81984 0.40571
   1  -3  -5   97.29   10.28   0-0.02722 0.08576 0.56261-0.76581-0.82730 0.64234
   1   1   1  199.73   16.76   0-0.02380 0.09336 0.56683-0.49819-0.82434 0.86661
   1   6   4  384.37   10.27   0-0.03330 0.10797 0.55503-0.14701-0.83252 0.98784
   1  10   4   -9.66    6.57   0-0.03623 0.10944 0.55137 0.12726-0.83499 0.99005
   1  11   4    3.17    6.85   0-0.02648 0.10120 0.56352 0.18451-0.82667 0.98132
   2  -6 -17    5.61    8.57   0-0.02259 0.12756 0.56833-0.97645-0.82327 0.18452
   2  -6 -16    7.57    7.47   0-0.03087 0.13782 0.55807-0.96588-0.83044 0.22983
   2  -5 -11   38.51    6.89   0-0.02843 0.14569 0.56110-0.90105-0.82835 0.41806
   2  -4  -8  235.71   12.52   0-0.01901 0.14131 0.57271-0.84503-0.82013 0.52446
   2   4   3  107.92    9.02   0-0.02941 0.17135 0.55989-0.28778-0.82919 0.95063
   2   6   4  295.53   11.85   0-0.02057 0.16424 0.57081-0.16303-0.82150 0.98056
   2   7   4    2.53    7.39   0-0.03038 0.17528 0.55868-0.08290-0.83003 0.98916
   2   8   4   42.67    6.97   0-0.03428 0.17766 0.55381-0.01041-0.83334 0.99216
   2   9   4    9.31    6.95   0-0.03257 0.17692 0.55594 0.05581-0.83190 0.99060
   2  10   4   51.31    7.37   0-0.02746 0.17155 0.56231 0.11694-0.82751 0.98577
   2  11   4    4.77    9.98   0-0.01926 0.16273 0.57242 0.17493-0.82034 0.97804
   3  -6 -19   -3.35    8.68   0-0.02015 0.18963 0.57132-0.97735-0.82113 0.11249
   3  -6 -18    9.00    7.32   0-0.02770 0.19974 0.56201-0.97013-0.82772 0.15467
   3  -6 -17    2.03    7.42   0-0.03525 0.21137 0.55259-0.95999-0.83417 0.20011
   3  -5 -12    8.47    8.42   0-0.02264 0.20636 0.56827-0.90773-0.82332 0.37892
   3  -3  -6  126.16   13.22   0-0.01829 0.21305 0.57360-0.77797-0.81948 0.60368
   3   3   2   52.53    9.16   0-0.02795 0.23727 0.56171-0.35814-0.82793 0.91523
   3   5   3   11.76    6.98   0-0.03330 0.24572 0.55503-0.21569-0.83252 0.95733
   3   8   4   21.32    9.59   0-0.01994 0.23339 0.57158-0.02831-0.82095 0.98314
   3   9   4   -0.26    9.58   0-0.01978 0.23138 0.57177 0.03834-0.82081 0.98303
   3  12   3    7.77    7.19   0-0.02527 0.23599 0.56502 0.25066-0.82561 0.94961
   4  -5 -13    6.37    6.78   0-0.02892 0.28007 0.56050-0.90112-0.82877 0.34954
   4   4   2   -0.55    7.33   0-0.03257 0.31171 0.55594-0.28547-0.83190 0.92241
   4   6   3   14.33    7.56   0-0.02551 0.30675 0.56472-0.15767-0.82582 0.95412
   4   7   3    4.02    7.28   0-0.03428 0.31524 0.55381-0.07874-0.83334 0.96147
   4   9   3   17.93    6.82   0-0.03550 0.31603 0.55228 0.05893-0.83437 0.96234
   4  10   3   -5.89    7.27   0-0.03038 0.30898 0.55868 0.11967-0.83003 0.95841
   4  11   3   -2.74    8.56   0-0.02125 0.29999 0.56998 0.17822-0.82210 0.95143
   5  -5 -15   29.62    9.63   0-0.02502 0.34284 0.56532-0.90562-0.82540 0.27349
   5   1  -1   66.22   12.42   0-0.02307 0.36502 0.56773-0.50043-0.82370 0.80501
   5   2   0   18.84    8.61   0-0.02405 0.36835 0.56653-0.43179-0.82455 0.84316
   5   5   2   22.22    7.51   0-0.02454 0.37279 0.56593-0.22749-0.82498 0.91892
   5  11   2    2.82    7.02   0-0.03160 0.37683 0.55716 0.18919-0.83107 0.92511
   6  -5 -18   -3.96    9.50   0-0.02320 0.40267 0.56758-0.90579-0.82381 0.16469
   6   1  -2   79.55    8.38   0-0.02843 0.43773 0.56110-0.49417-0.82835 0.77522
   6   2  -1   97.89    8.45   0-0.03063 0.44147 0.55837-0.42354-0.83024 0.81498
   6   3   0   75.97    9.16   0-0.02304 0.43554 0.56776-0.36509-0.82367 0.84616
   6   5   1   21.80    7.62   0-0.03136 0.44634 0.55746-0.21887-0.83086 0.89106
   6   7   2   50.28    9.33   0-0.01936 0.43521 0.57229-0.09815-0.82043 0.91730
   6   8   2   17.84    8.82   0-0.02234 0.43858 0.56863-0.02658-0.82306 0.92059
   6   9   2   24.63    8.67   0-0.02116 0.43855 0.57009 0.04165-0.82202 0.91982
   6  10   2  -10.07    9.04   0-0.01905 0.43244 0.57267 0.10412-0.82016 0.91719
   6  11   1   -6.21    7.54   0-0.03574 0.44825 0.55198 0.19454-0.83458 0.89462
   7  -4 -15    1.90   10.43   0-0.01864 0.47317 0.57317-0.84676-0.81979 0.27545
   7  -3 -11    5.45   11.72   0-0.00591 0.46840 0.58859-0.79448-0.80830 0.41575
   7  -1  -6   10.24    9.65   0-0.01704 0.48892 0.57512-0.64460-0.81838 0.61596
   7   1  -3  144.40   10.98   0-0.02050 0.49707 0.57089-0.50430-0.82144 0.73373
   7   2  -2   -0.17    6.83   0-0.02624 0.50506 0.56382-0.42894-0.82646 0.77658
   7   3  -1   28.49    9.82   0-0.02112 0.50125 0.57013-0.36825-0.82199 0.81013
   7   5   0   88.71    7.95   0-0.03136 0.51333 0.55746-0.21888-0.83086 0.85691
   7   7   1    9.13    9.89   0-0.02017 0.50424 0.57130-0.09691-0.82115 0.88423
   7   8   1   31.28    7.46   0-0.02356 0.50773 0.56713-0.02454-0.82413 0.88722
   7   9   1    3.76    8.45   0-0.02098 0.50712 0.57031 0.04253-0.82186 0.88661
   7  10   1    8.78   10.10   0-0.02015 0.50290 0.57132 0.10667-0.82113 0.88308
   8   0  -6   61.35    8.03   0-0.03184 0.57242 0.55685-0.55854-0.83128 0.63286
   8   5  -1   -5.50    7.34   0-0.02527 0.57406 0.56502-0.22657-0.82561 0.81739
   8   8   0    0.23   10.53   0-0.01966 0.57100 0.57192-0.02935-0.82070 0.84996
   8   9   0   16.99    9.99   0-0.02001 0.57059 0.57149 0.03881-0.82101 0.84956
   9   1  -6   -1.40    9.09   0-0.01966 0.62888 0.57192-0.50475-0.82070 0.62693
   9   2  -5    2.63    7.19   0-0.03136 0.64302 0.55746-0.42353-0.83086 0.67379
   9   3  -4    2.73    7.55   0-0.03184 0.64507 0.55685-0.35488-0.83128 0.71205
   9   4  -3   60.03    7.69   0-0.02478 0.63942 0.56563-0.29649-0.82519 0.74403
   9   6  -2   35.92    7.17   0-0.02673 0.64367 0.56322-0.15821-0.82688 0.78290
   9   7  -2    7.17    7.32   0-0.03379 0.65038 0.55442-0.08031-0.83293 0.78948
  10   0 -10    0.32   10.46   0-0.02405 0.69483 0.56653-0.56860-0.82455 0.48109
  10   1  -8   14.71    9.69   0-0.01800 0.69307 0.57396-0.50791-0.81923 0.55123
  10   4  -5    0.98    7.34   0-0.03330 0.71259 0.55503-0.28421-0.83252 0.68027
  10   5  -4    5.27    8.70   0-0.02134 0.70630 0.56986-0.23129-0.82218 0.70718
  10   7  -3    2.39    9.45   0-0.02015 0.70217 0.57132-0.09777-0.82113 0.74237
  11   2  -9   -0.14   10.52   0-0.02088 0.76244 0.57043-0.43538-0.82177 0.52205
  11   3  -8    5.30    7.58   0-0.03087 0.77411 0.55807-0.35638-0.83044 0.56642
  11   4  -7   -8.64    7.42   0-0.03038 0.77465 0.55868-0.28770-0.83003 0.60574
  11   5  -6   -2.26    9.52   0-0.02198 0.77034 0.56908-0.22973-0.82274 0.63666
 -11   3  -8    1.69    9.04   0-0.00454-0.77319 0.59015-0.38204-0.80688 0.46147
 -10   0 -11   -4.25    7.25   0-0.00551-0.70669 0.58899-0.58775-0.80778 0.35101
 -10   1  -9   -0.50    9.03   0-0.00063-0.71379 0.59481-0.52371-0.80326 0.42272
 -10   2  -7    3.68    9.92   0 0.00009-0.70708 0.59567-0.45627-0.80258 0.49905
 -10   6  -3   -3.36    9.78   0 0.00046-0.70047 0.59611-0.18661-0.80224 0.64936
  -9  -2 -14   -0.36    7.30   0-0.01235-0.63598 0.58077-0.71588-0.81401 0.24702
  -9  -1 -11   -1.75    9.58   0-0.00112-0.64084 0.59423-0.66115-0.80372 0.35076
  -9  -1 -10   -1.40    6.62   0-0.01503-0.62547 0.57751-0.64468-0.81642 0.40164
  -9   0  -8   -1.78    7.42   0-0.00600-0.63074 0.58840-0.58754-0.80823 0.46942
  -9   1  -6    3.23    7.30   0-0.00747-0.62687 0.58665-0.51528-0.80958 0.54773
  -8  -3 -15   -3.74    7.18   0-0.01235-0.56800 0.58077-0.78377-0.81401 0.21292
  -8  -2 -11    8.75    7.12   0-0.00625-0.56876 0.58811-0.72110-0.80846 0.36043
  -8  -1  -8   10.76    7.05   0-0.00722-0.56191 0.58694-0.65203-0.80935 0.47536
  -8   0  -6   20.09    9.09   0-0.00214-0.56174 0.59301-0.58993-0.80467 0.54686
  -8   1  -4   69.87    7.77   0-0.01454-0.54620 0.57811-0.50896-0.81599 0.63345
  -8   2  -3   54.85    9.67   0 0.00022-0.55913 0.59582-0.45902-0.80246 0.65800
  -8   4  -1   51.85   11.07   0 0.00090-0.55673 0.59662-0.32514-0.80183 0.73250
  -7  -3 -12    3.27    7.50   0-0.00747-0.49764 0.58665-0.79005-0.80958 0.32648
  -7  -2  -9   23.76    9.39   0-0.00040-0.50194 0.59508-0.72906-0.80305 0.43473
  -7  -1  -6   14.46    6.90   0-0.01113-0.48451 0.58224-0.64846-0.81291 0.55836
  -7   9   2    3.84    9.68   0 0.00009-0.47960 0.59567 0.01611-0.80258 0.85018
  -6  -4 -15  -13.80    9.38   0-0.00100-0.43999 0.59437-0.86512-0.80360 0.21040
  -6  -4 -14    2.64    6.72   0-0.00869-0.43085 0.58518-0.85653-0.81069 0.25543
  -6  -3 -10   24.37    7.50   0-0.00332-0.43027 0.59161-0.79369-0.80576 0.40337
  -6  -2  -7    0.24    6.91   0-0.00405-0.42188 0.59074-0.72631-0.80643 0.51726
  -6  -1  -5   13.85    8.47   0 0.00229-0.42681 0.59827-0.66432-0.80052 0.58823
  -6   0  -3    3.09    7.13   0-0.00673-0.41423 0.58753-0.58547-0.80890 0.67249
  -5  -5 -18   -2.55    7.72   0-0.01235-0.36588 0.58077-0.91998-0.81401 0.11049
  -5  -5 -17    3.42    6.79   0-0.01600-0.36015 0.57633-0.91555-0.81730 0.15185
  -5  -4 -12   11.55    6.64   0-0.00405-0.36503 0.59074-0.86062-0.80643 0.33171
  -5  -4 -11    1.50    6.94   0-0.01674-0.34748 0.57544-0.84691-0.81795 0.38068
  -5  -3  -8   -2.80    6.87   0-0.01088-0.34778 0.58254-0.78637-0.81269 0.48939
  -5   0  -2    3.16    8.09   0-0.00698-0.34266 0.58723-0.58550-0.80913 0.71444
  -4  -5 -17   -3.03    8.17   0 0.00046-0.30838 0.59611-0.93714-0.80224 0.13926
  -4  -5 -16    7.46    8.50   0-0.00139-0.30515 0.59391-0.93006-0.80397 0.18249
  -4  -5 -15   -3.04    7.12   0-0.00917-0.29363 0.58459-0.92372-0.81113 0.22573
  -4  -4 -10   11.98    7.05   0-0.00991-0.28595 0.58371-0.85399-0.81180 0.41688
  -4  -3  -7  115.09    8.60   0-0.00795-0.28155 0.58606-0.78838-0.81002 0.52989
  -4   1   0  398.05   18.11   0-0.00064-0.27657 0.59479-0.52477-0.80327 0.78864
  -4   7   4   -3.67    9.02   0-0.00051-0.27059 0.59495-0.11953-0.80315 0.93920
  -4   8   4   93.66    7.95   0-0.01137-0.25828 0.58195-0.03707-0.81313 0.94999
  -4   9   4    1.11    6.98   0-0.01161-0.26056 0.58165 0.03011-0.81335 0.94952
  -4  10   4    6.73    8.94   0-0.00350-0.26807 0.59139 0.09157-0.80593 0.94319
  -3  -5 -14   -8.97    9.65   0-0.00112-0.23037 0.59423-0.93322-0.80372 0.26026
  -3  -5 -13   30.60    7.65   0-0.01161-0.22020 0.58165-0.92067-0.81335 0.30799
  -3  -4  -9   -4.78    7.53   0-0.00942-0.21266 0.58430-0.85618-0.81136 0.45778
  -3  -3  -6   -2.12    7.24   0-0.01381-0.20262 0.57899-0.78309-0.81533 0.57568
  -3  -2  -4   24.22    8.84   0-0.00551-0.20898 0.58899-0.72347-0.80778 0.64535
  -3   6   4   77.08    8.88   0-0.01430-0.18650 0.57840-0.16920-0.81577 0.95630
  -3  11   4   -3.95    6.88   0-0.01430-0.18980 0.57840 0.16928-0.81577 0.95545
  -3  12   4    8.11    9.10   0 0.00026-0.20241 0.59586 0.22115-0.80243 0.94169
  -2  -6 -19    1.75    7.19   0-0.01722-0.15559 0.57484-0.98244-0.81838 0.08853
  -2  -5 -13   -0.21    8.73   0 0.00083-0.16439 0.59654-0.93614-0.80189 0.30013
  -2  -5 -12   46.66    7.21   0-0.01113-0.15030 0.58224-0.92139-0.81291 0.34887
  -2  -4  -8   70.67    7.32   0-0.01722-0.13612 0.57484-0.84562-0.81838 0.50781
  -2   5   4   46.50    8.45   0-0.00625-0.12568 0.58811-0.24739-0.80846 0.95262
  -2   9   5   84.00    9.59   0 0.00087-0.13136 0.59659 0.01563-0.80186 0.98267
  -2  12   4   -3.03    7.42   0-0.01088-0.12466 0.58254 0.23311-0.81269 0.95621
  -1  -6 -19    3.00    6.92   0-0.00991-0.09383 0.58371-0.99107-0.81180 0.08598
  -1  -6 -18    0.34    7.36   0-0.01332-0.08835 0.57958-0.98702-0.81489 0.12708
  -1  -5 -12  118.47   10.64   0-0.00204-0.08966 0.59314-0.93258-0.80457 0.34408
  -1  -4  -8    1.84    7.29   0-0.00698-0.07504 0.58723-0.85938-0.80913 0.50121
  -1   3   3  922.08   21.16   0-0.00185-0.06302 0.59336-0.38799-0.80439 0.91499
  -1   8   5    9.80    6.77   0-0.00454-0.05634 0.59015-0.04546-0.80688 0.99291
  -1   9   5   36.48    7.30   0-0.00551-0.05578 0.58899 0.02290-0.80778 0.99370
  -1  10   5   14.27    9.41   0-0.00105-0.06048 0.59431 0.08664-0.80365 0.98963
   0  -6 -20   -6.39    7.37   0-0.00405-0.03278 0.59074-0.99818-0.80643 0.04649
   0  -6 -19   -6.40    6.63   0-0.00625-0.02851 0.58811-0.99564-0.80846 0.08653
   0  -6 -18   -3.27    6.89   0-0.00966-0.02302 0.58401-0.99136-0.81158 0.12774
   0  -6 -17    7.30    6.41   0-0.01503-0.01828 0.57751-0.98509-0.81642 0.17020
   0  -5 -12  162.68    9.92   0 0.00147-0.02404 0.59729-0.93748-0.80130 0.34594
   0  -5 -11   -2.22    6.93   0-0.01527-0.00344 0.57722-0.91706-0.81664 0.39872
   0  -4  -8   91.60   11.51   0-0.00163-0.01418 0.59362-0.86481-0.80419 0.50106
   0   3   3  372.82   14.08   0-0.00771 0.01186 0.58635-0.38137-0.80980 0.92400
   0   7   5  164.28   10.73   0-0.00020 0.00790 0.59532-0.11876-0.80285 0.99198
   0   8   5   97.76    7.67   0-0.00649 0.01450 0.58782-0.04353-0.80868 0.99831
   0   9   5   13.54    7.16   0-0.00722 0.01524 0.58694 0.02543-0.80935 0.99890
   0  10   5   12.34    8.49   0-0.00332 0.01108 0.59161 0.08872-0.80576 0.99506
   1  -6 -20    8.50    8.89   0-0.00354 0.03322 0.59134-0.99847-0.80596 0.04982
   1  -6 -19   -0.78    7.58   0-0.00649 0.04069 0.58782-0.99548-0.80868 0.09067
   1  -6 -18    5.62    7.01   0-0.01039 0.04417 0.58312-0.99089-0.81224 0.13172
   1  -6 -17    7.71    6.62   0-0.01601 0.05182 0.57633-0.98405-0.81730 0.17484
   1  -5 -12    7.02    9.36   0 0.00132 0.04464 0.59712-0.93726-0.80144 0.34902
   1  -4  -8   12.03    7.53   0-0.00454 0.05826 0.59015-0.86197-0.80688 0.50720
   1   2   2 2028.23   25.77   0-0.01722 0.08838 0.57484-0.43810-0.81838 0.89862
   1   3   3  307.62   16.49   0-0.00022 0.07316 0.59530-0.39082-0.80287 0.92065
   1   5   4    4.13    8.00   0-0.01332 0.08941 0.57958-0.23975-0.81489 0.97044
   1   8   5   14.38    8.98   0-0.00307 0.08039 0.59190-0.04778-0.80553 0.99856
   1   9   5    2.49    8.55   0-0.00381 0.08094 0.59103 0.02097-0.80621 0.99939
   1  10   5    4.12    8.74   0-0.00015 0.07656 0.59538 0.08490-0.80281 0.99602
   1  12   4   -2.05    7.15   0-0.01405 0.08607 0.57870 0.23636-0.81555 0.97078
   2  -6 -19    1.49    7.94   0-0.01161 0.11477 0.58165-0.98959-0.81335 0.09921
   2  -6 -18   -2.27    7.41   0-0.01576 0.12091 0.57662-0.98411-0.81708 0.14110
   2  -5 -12    1.39    7.37   0-0.00649 0.12363 0.58782-0.92773-0.80868 0.36057
   2   5   4  924.83   15.27   0-0.00084 0.14457 0.59457-0.25441-0.80345 0.96304
   2  12   4    2.87    7.10   0-0.00747 0.14862 0.58665 0.22811-0.80958 0.96849
   3  -5 -13    3.90    9.27   0-0.00109 0.18278 0.59426-0.93354-0.80369 0.32101
   3  -4  -9   29.58   10.42   0-0.00166 0.19183 0.59359-0.86619-0.80422 0.47344
   3  -2  -4   10.97   13.57   0 0.00257 0.19510 0.59860-0.73498-0.80026 0.66062
   3   4   3  990.79   14.01   0-0.00698 0.21786 0.58723-0.31548-0.80913 0.93461
   3   6   4  107.65    8.47   0-0.00405 0.21655 0.59074-0.18351-0.80643 0.96951
   3   7   4   66.21    7.66   0-0.01479 0.22770 0.57781-0.10278-0.81621 0.97937
   3  10   4   -0.92    7.02   0-0.01503 0.22640 0.57751 0.10095-0.81642 0.97940
   3  11   4   -2.13    7.31   0-0.00747 0.21842 0.58665 0.16006-0.80958 0.97272
   3  12   4   -8.71    9.20   0 0.00083 0.20850 0.59654 0.21613-0.80189 0.96331
   4  -5 -14   -1.74    7.14   0-0.00869 0.25964 0.58518-0.92536-0.81069 0.29440
   4  -4 -10    3.03    9.67   0 0.00193 0.25532 0.59784-0.87117-0.80086 0.43561
   4  -3  -7   44.70   10.44   0 0.00580 0.25625 0.60241-0.80747-0.79721 0.54682
   4   1   0  391.77   15.41   0-0.00055 0.27509 0.59490-0.52737-0.80319 0.81881
   4   2   1  291.03   11.25   0-0.00405 0.28046 0.59074-0.45526-0.80643 0.86001
   4   5   3   44.87    8.13   0-0.00893 0.28881 0.58489-0.24594-0.81091 0.94006
   4   8   4   45.12    9.17   0-0.00234 0.28448 0.59277-0.04970-0.80485 0.97146
   4   9   4   19.63    8.88   0-0.00269 0.28551 0.59236 0.01952-0.80517 0.97215
   4  10   4    4.95    9.87   0-0.00083 0.28276 0.59457 0.08428-0.80345 0.96917
   5  -5 -17   30.10   10.03   0 0.00107 0.31106 0.59682-0.93876-0.80167 0.17399
   5  -5 -16    4.70    7.13   0-0.00942 0.32355 0.58430-0.92543-0.81136 0.22170
   5  -4 -11   84.21    8.86   0-0.00820 0.33272 0.58577-0.85890-0.81024 0.41069
   5  -3  -8   18.89   10.53   0 0.00498 0.32446 0.60144-0.80719-0.79798 0.51294
   5   0  -2   -0.15   10.48   0-0.00002 0.34157 0.59553-0.59647-0.80269 0.74547
   5   3   1  566.00   12.14   0-0.01479 0.36032 0.57781-0.37474-0.81621 0.87348
   5   4   2  165.17   11.29   0-0.00060 0.34755 0.59484-0.32404-0.80323 0.89822
   5   6   3   20.53    9.96   0-0.00084 0.35044 0.59456-0.18857-0.80345 0.93547
   5   7   3    2.75    6.88   0-0.01088 0.35966 0.58254-0.10854-0.81269 0.94510
   5   8   3   -3.58    6.55   0-0.01527 0.36374 0.57722-0.03513-0.81664 0.94921
   5   9   3    8.08    6.95   0-0.01552 0.36493 0.57692 0.03380-0.81686 0.94868
   5  10   3   -3.76    6.77   0-0.01161 0.35928 0.58165 0.09661-0.81335 0.94601
   5  11   3    8.26    7.29   0-0.00527 0.35419 0.58928 0.15754-0.80756 0.93918
   6  -4 -13   -0.50   10.54   0-0.00088 0.39036 0.59452-0.86856-0.80349 0.33153
   6   0  -3   -1.67    9.15   0-0.00307 0.41308 0.59190-0.59323-0.80553 0.71434
   6   4   1   59.54    7.49   0-0.00991 0.42417 0.58371-0.31338-0.81180 0.87225
   6   6   2   60.06    7.52   0-0.00893 0.42531 0.58489-0.17886-0.81091 0.90940
   6  11   2    3.53    7.61   0-0.01113 0.42538 0.58224 0.16394-0.81291 0.91122
   7  -4 -16   -0.54    9.33   0 0.00266 0.45206 0.59871-0.87267-0.80017 0.21861
   7   4   0    6.64    7.08   0-0.01064 0.49345 0.58283-0.31282-0.81247 0.83814
   7   6   1   13.54    7.89   0-0.01113 0.49566 0.58224-0.17612-0.81291 0.87660
   8   1  -4  135.12   10.91   0-0.00124 0.54500 0.59409-0.52817-0.80382 0.68203
   8   2  -3   -0.03    6.77   0-0.01259 0.55842 0.58047-0.44600-0.81423 0.73055
   8   3  -2    7.38    7.32   0-0.01210 0.56018 0.58106-0.37933-0.81379 0.76718
   8   4  -1    0.53    6.65   0-0.00454 0.55350 0.59015-0.32002-0.80688 0.79896
   8   6   0   21.95    7.07   0-0.00747 0.55844 0.58665-0.18045-0.80958 0.83935
   8   7   0   12.91    7.81   0-0.01625 0.56761 0.57603-0.10211-0.81751 0.84679
   9   5  -2   -1.23    7.02   0-0.01308 0.62903 0.57988-0.24179-0.81467 0.77282
   9   6  -1   -4.03    8.54   0 0.00034 0.61522 0.59596-0.19064-0.80235 0.79790
   9   7  -1   15.30    7.32   0-0.00771 0.62611 0.58635-0.11272-0.80980 0.80472
   9   8  -1    2.46    7.04   0-0.01235 0.62869 0.58077-0.03894-0.81401 0.80966
  10  -1 -12    5.76   13.80   0 0.01463 0.65233 0.61271-0.68326-0.78872 0.36927
  10   2  -6    0.89    9.24   0-0.00063 0.67749 0.59481-0.46117-0.80326 0.61153
  10   3  -5    8.74    6.89   0-0.00527 0.68556 0.58928-0.38804-0.80756 0.65432
  10   4  -4    0.73    8.87   0-0.00210 0.68507 0.59306-0.32244-0.80462 0.69102
  10   6  -3    4.74    7.13   0-0.01064 0.69414 0.58283-0.17750-0.81247 0.73499
  11   1 -10    3.60    8.84   0 0.00402 0.73535 0.60032-0.53515-0.79889 0.45945
  11   3  -7    4.63   10.10   0-0.00185 0.74715 0.59336-0.39233-0.80440 0.57879
  11   4  -6   -6.00    8.48   0-0.00210 0.75032 0.59306-0.32241-0.80462 0.61890
  11   5  -5   12.68   10.60   0 0.00046 0.74779 0.59611-0.25888-0.80224 0.65247
 -10   0 -12   10.37    7.73   0 0.00578-0.72171 0.60240-0.59855-0.79679 0.30316
 -10   1 -10   -3.07   10.25   0 0.01872-0.72922 0.61743-0.54845-0.78430 0.36530
 -10   2  -8   -4.38    8.87   0 0.02092-0.73083 0.61995-0.48327-0.78213 0.43891
 -10   3  -6    0.91    9.19   0 0.01689-0.71870 0.61532-0.41051-0.78609 0.51949
 -10   4  -5   -0.44    8.57   0 0.02104-0.72528 0.62009-0.34667-0.78201 0.55310
 -10   5  -4    0.27    9.46   0 0.02055-0.72225 0.61953-0.27832-0.78249 0.59197
  -9  -1 -13   -5.35    9.88   0 0.01884-0.66521 0.61757-0.68485-0.78418 0.25488
  -9  -1 -12   -0.66    7.16   0 0.00944-0.65427 0.60668-0.67385-0.79330 0.30229
  -9   0  -9  -10.33    7.06   0 0.01164-0.65103 0.60924-0.60858-0.79119 0.41435
  -9   1  -7    2.58    9.39   0 0.01750-0.65431 0.61603-0.54470-0.78549 0.48578
  -9   2  -5    2.91    7.06   0 0.00969-0.64258 0.60697-0.46766-0.79306 0.56941
  -9   3  -4    0.58    8.43   0 0.02092-0.65329 0.61995-0.41518-0.78213 0.59523
  -9   5  -2   -2.58    9.59   0 0.01958-0.64750 0.61841-0.27761-0.78346 0.67271
  -9   7  -1    0.09   12.68   0 0.03086-0.65757 0.63124-0.15150-0.77219 0.70089
  -8  -2 -14    3.22    8.71   0 0.01897-0.60457 0.61771-0.75301-0.78406 0.21959
  -8  -2 -13   -3.60    7.40   0 0.01457-0.59148 0.61264-0.74784-0.78835 0.26315
  -8  -2 -12    7.99    7.52   0 0.00529-0.58237 0.60182-0.73468-0.79725 0.31110
  -8  -1  -9   -1.15    6.97   0 0.01091-0.58032 0.60839-0.67590-0.79189 0.41888
  -8   0  -7    3.21    9.04   0 0.01911-0.58975 0.61787-0.61573-0.78392 0.48721
  -8   1  -5    8.01    9.77   0 0.02057-0.58473 0.61955-0.54920-0.78248 0.56250
  -8   3  -2   69.93    8.41   0 0.00822-0.56555 0.60526-0.40080-0.79447 0.68796
  -8   9   1   -1.13   12.30   0 0.04262-0.59665 0.64435-0.02909-0.76009 0.76850
  -7  -3 -16   -4.14    9.16   0 0.02031-0.53532 0.61925-0.82420-0.78274 0.14565
  -7  -3 -15    5.70    8.47   0 0.01758-0.53050 0.61611-0.81692-0.78542 0.18947
  -7  -3 -14    6.38    7.04   0 0.01042-0.52248 0.60782-0.80917-0.79236 0.23381
  -7  -3 -13    0.25    7.26   0 0.00236-0.50971 0.59837-0.80181-0.80002 0.27868
  -7  -2 -10    7.10    7.03   0 0.01604-0.51998 0.61434-0.74771-0.78692 0.38055
  -7  -1  -7    0.13    6.81   0 0.01433-0.51033 0.61236-0.68008-0.78859 0.49545
  -7   0  -5  132.72    9.98   0 0.01901-0.51221 0.61776-0.61633-0.78401 0.56756
  -7   1  -3   29.88    7.23   0 0.00627-0.49604 0.60297-0.53312-0.79633 0.65610
  -7   8   2    3.20    9.21   0 0.01701-0.49860 0.61546-0.06878-0.78597 0.83576
  -7  10   2   -3.71    8.82   0 0.01823-0.50282 0.61687 0.06421-0.78478 0.83373
  -6  -4 -18   -3.78    7.40   0 0.01115-0.45908 0.60868-0.87983-0.79166 0.08392
  -6  -4 -17    7.47    7.13   0 0.00822-0.45704 0.60526-0.87479-0.79447 0.12552
  -6  -4 -16    6.41    6.76   0 0.00407-0.45077 0.60039-0.86990-0.79841 0.16754
  -6  -3 -11   26.31    7.72   0 0.01066-0.44682 0.60811-0.81013-0.79213 0.35107
  -6  -2  -8   99.85   10.33   0 0.01765-0.44735 0.61619-0.75069-0.78535 0.45858
  -6   1  -2  181.88   12.53   0 0.02076-0.43957 0.61977-0.55008-0.78229 0.68400
  -6   8   3    9.23   10.18   0 0.01823-0.42738 0.61687-0.07154-0.78478 0.87671
  -6   9   3    1.83    8.74   0 0.01359-0.42457 0.61151 0.00305-0.78930 0.88114
  -6  10   3   -1.06    9.30   0 0.01872-0.43202 0.61743 0.06326-0.78430 0.87511
  -5  -4 -15    0.37    8.73   0 0.02019-0.39396 0.61911-0.89246-0.78286 0.19169
  -5  -4 -14    0.75    6.96   0 0.01481-0.38543 0.61293-0.88451-0.78811 0.23643
  -5  -4 -13   10.85    6.72   0 0.00627-0.37772 0.60297-0.87306-0.79633 0.28327
  -5  -3  -9   79.85    7.97   0 0.00871-0.37100 0.60583-0.80842-0.79400 0.43371
  -5  -2  -6   13.08    7.27   0 0.00431-0.36139 0.60067-0.73475-0.79818 0.55193
  -5  -1  -4  142.66    9.31   0 0.00920-0.36270 0.60640-0.67252-0.79353 0.62315
  -4  -5 -19   -1.83    7.38   0 0.00724-0.31876 0.60411-0.94359-0.79540 0.05732
  -4  -5 -18    0.65    7.36   0 0.00505-0.31448 0.60153-0.94105-0.79749 0.09748
  -4  -4 -12   74.47    9.97   0 0.01803-0.31701 0.61663-0.88761-0.78498 0.31322
  -4  -4 -11   17.60    7.17   0 0.00529-0.30320 0.60182-0.87221-0.79725 0.36420
  -4  -3  -8  149.32    8.32   0 0.01628-0.30830 0.61462-0.81699-0.78669 0.46799
  -4  -2  -5  416.73   10.77   0 0.00553-0.29191 0.60211-0.73618-0.79702 0.59264
  -4  -1  -3    0.57    8.40   0 0.00505-0.28560 0.60153-0.66997-0.79749 0.66781
  -4   2   1   16.72   15.31   0 0.03387-0.30862 0.63462-0.49717-0.76912 0.79238
  -4  11   4    1.12    6.99   0 0.00651-0.27990 0.60326 0.14498-0.79610 0.93266
  -3  -5 -18    6.01    8.69   0 0.01978-0.26323 0.61864-0.95840-0.78326 0.08628
  -3  -5 -17    0.43    8.70   0 0.01811-0.25551 0.61673-0.95530-0.78490 0.12793
  -3  -5 -16    1.83    7.01   0 0.01262-0.24877 0.61038-0.94994-0.79024 0.17026
  -3  -5 -15    6.60    6.99   0 0.00651-0.24352 0.60326-0.94177-0.79610 0.21444
  -3  -4 -10   36.94    7.37   0 0.00969-0.23670 0.60697-0.87761-0.79306 0.40158
  -3  -3  -7  363.90    9.65   0 0.01652-0.23767 0.61490-0.81752-0.78645 0.50960
[truncated: 1,855,418 more chars]
